# Supplementary material
Source: publisher site journal article supplement (https://www.spandidos-publications.com/2423/downloadSupplementary)
Supplement: Supplementary file 1 [file downloadSupplementary]

## Sheet: 差异蛋白详情表
Table SIII. Detailed table of difference protein between BPA and control group.
Accession	Description	FC(BPA/C)	Log2FC(P/C)	P_value(BPA/C)	Regulate	Significant	BPA	C	GO Term	GO ID	KO ID	KO Name	Pathway ID	Pathway_defition	COG ID	COG_Functional Categories	Pfam ID	Domain	Domain Description	Subcellular Loc	Unique Peptides	Coverage（%）	MW [kDa]	FDR Confidence
Q9H8M2	Bromodomain-containing protein 9 OS=Homo sapiens OX=9606 GN=BRD9 PE=1 SV=2	4.85033	2.27808	0.004186	up	yes	5.088	1.049	BP:regulation of primary metabolic process;BP:regulation of metabolic process;BP:quinone metabolic process;BP:small molecule biosynthetic process;BP:organic cyclic compound biosynthetic process;BP:cellular component organization or biogenesis;BP:single-organism metabolic process;BP:single-organism biosynthetic process;BP:regulation of macromolecule metabolic process;BP:regulation of RNA biosynthe…	GO:0080090;GO:0019222;GO:1901661;GO:0044283;GO:1901362;GO:0071840;GO:0044710;GO:0044711;GO:0060255;GO:2001141;GO:0055114;GO:0046483;GO:0019438;GO:0044281;GO:0006807;GO:0050789;GO:0097659;GO:1901576;GO:0051186;GO:0044260;GO:1901663;GO:0051188;GO:0016043;GO:0065007;GO:1901360;GO:0018130;GO:0009889;GO:0050794;GO:0008150;GO:0008152;GO:0034654;GO:0016070;GO:0044271;GO:0015980;GO:0006355;GO:0010556;GO:…	K11723	BRD7_9	------	------	------	------	PF12024.5;PF00439.22	DUF3512;Bromodomain	Domain of unknown function;Bromodomain	nuclear	1	1	67	Medium
A0A087WWM0	Trafficking protein particle complex subunit OS=Homo sapiens OX=9606 GN=TRAPPC3 PE=1 SV=1	3.15789	1.65896	0.00804	up	yes	3.84	1.216	BP:COPII vesicle coating;BP:cellular component assembly;BP:macromolecular complex subunit organization;BP:vesicle coating;BP:cellular component organization or biogenesis;BP:ER to Golgi vesicle-mediated transport;BP:protein complex subunit organization;BP:cellular component organization;BP:macromolecular complex assembly;BP:single-organism process;BP:transport;BP:cellular process;BP:Golgi vesicle…	GO:0048208;GO:0022607;GO:0043933;GO:0006901;GO:0071840;GO:0006888;GO:0071822;GO:0016043;GO:0065003;GO:0044699;GO:0006810;GO:0009987;GO:0048193;GO:0006461;GO:0044765;GO:0008150;GO:0051649;GO:0051234;GO:0051179;GO:1902578;GO:0016192;GO:0006996;GO:0046907;GO:0016050;GO:1902582;GO:0005783;GO:0043229;GO:0043227;GO:0043226;GO:0044446;GO:0031090;GO:0016020;GO:0030008;GO:0044431;GO:0005794;GO:0098588;GO:…	------	------	------	------	------	------	PF04051.13	TRAPP	Transport protein particle	cytoplasmic	1	4	21.2	Medium
C9JF17	Apolipoprotein D (Fragment) OS=Homo sapiens OX=9606 GN=APOD PE=1 SV=1	2.93881	1.55523	0.02698	up	yes	3.506	1.193	BP:regulation of intracellular protein transport;BP:negative regulation of lipoprotein oxidation;BP:regulation of lipoprotein oxidation;BP:regulation of metabolic process;BP:regulation of transport;BP:negative regulation of response to stimulus;BP:negative regulation of intracellular transport;BP:regulation of response to stimulus;BP:response to axon injury;BP:negative regulation of defense respo…	GO:0033157;GO:0034443;GO:0034442;GO:0019222;GO:0051049;GO:0048585;GO:0032387;GO:0048583;GO:0048678;GO:0031348;GO:0007162;GO:0044710;GO:0044281;GO:0051893;GO:0051895;GO:0080090;GO:0051716;GO:0010605;GO:0009968;GO:0071704;GO:0009966;GO:0032101;GO:0009611;GO:0060588;GO:1904590;GO:0045833;GO:0048519;GO:0032386;GO:2000405;GO:0031103;GO:0031102;GO:1901889;GO:1901888;GO:0060255;GO:0042493;GO:2000098;GO:…	K03098	APOD	------	------	COG3040	M:Cell wall/membrane/envelope biogenesis	PF08212.9;PF00061.20	Lipocalin_2;Lipocalin	Lipocalin-like domain;Lipocalin / cytosolic fatty-acid binding protein family	lysosomal	1	3	24.1	Medium
Q99643	Succinate dehydrogenase cytochrome b560 subunit, mitochondrial OS=Homo sapiens OX=9606 GN=SDHC PE=1 SV=1	2.84534	1.5086	0.001157	up	yes	2.686	0.944	BP:cell projection organization;BP:carboxylic acid metabolic process;BP:neuron projection development;BP:generation of precursor metabolites and energy;BP:cellular component organization or biogenesis;BP:single-organism metabolic process;BP:tricarboxylic acid metabolic process;BP:cellular component organization;BP:organic substance metabolic process;BP:single-organism process;BP:respiratory elect…	GO:0030030;GO:0019752;GO:0031175;GO:0006091;GO:0071840;GO:0044710;GO:0072350;GO:0016043;GO:0071704;GO:0044699;GO:0022904;GO:0044763;GO:0061564;GO:0044238;GO:0022900;GO:0009987;GO:0045333;GO:0008150;GO:0008152;GO:0043436;GO:0055114;GO:0015980;GO:0006082;GO:0006099;GO:0009060;GO:0006101;GO:0044237;GO:0006121;GO:0044281;GO:0098800;GO:0099512;GO:0099513;GO:0019866;GO:0045257;GO:1990204;GO:0043226;GO:…	K00236	SDHC, SDH3	hsa00190;hsa00020;hsa01200;hsa05012;hsa05016;hsa05010;hsa04932	Oxidative phosphorylation;Citrate cycl;Carbon metabolism;Parkinson's disease;Huntington's disease;Alzheimer's disease;Non-alcoholic fatty liver diseas	COG2009	C:Energy production and conversion	PF01127.19	Sdh_cyt	Succinate dehydrogenase/Fumarate reductase transmembrane subunit	mitochondrial	1	5	18.6	Medium
O00194	Ras-related protein Rab-27B OS=Homo sapiens OX=9606 GN=RAB27B PE=1 SV=4	2.18744	1.12924	0.02655	up	yes	2.194	1.003	BP:regulation of secretion;BP:positive regulation of secretion;BP:regulation of transport;BP:signal transduction;BP:establishment of organelle localization;BP:pigment granule localization;BP:positive regulation of biological process;BP:positive regulation of transport;BP:vesicle-mediated transport;BP:secretion by cell;BP:intracellular signal transduction;BP:regulation of biological process;BP:exo…	GO:0051046;GO:0051047;GO:0051049;GO:0007165;GO:0051656;GO:0051875;GO:0048518;GO:0051050;GO:0016192;GO:0032940;GO:0035556;GO:0050789;GO:0006887;GO:0045055;GO:0065007;GO:0071985;GO:0006810;GO:0050794;GO:0008150;GO:0051234;GO:0046903;GO:1903530;GO:1903532;GO:0044699;GO:1902578;GO:0032402;GO:0032401;GO:0032400;GO:0017157;GO:0009987;GO:0060627;GO:0032879;GO:0051650;GO:0051905;GO:0051904;GO:0045921;GO:…	K07886	RAB27B	hsa04972	Pancreatic secretion	------	------	PF00071.19;PF08477.10;PF00025.18	Ras;Roc;Arf	Ras family;Ras of Complex, Roc, domain of DAPkinase;ADP-ribosylation factor family	mitochondrial	1	5	24.6	High
O75628	GTP-binding protein REM 1 OS=Homo sapiens OX=9606 GN=REM1 PE=1 SV=2	1.81851	0.862753	0.02094	up	yes	2.044	1.124	BP:regulation of primary metabolic process;BP:regulation of metabolic process;BP:regulation of homotypic cell-cell adhesion;BP:regulation of alpha-beta T cell differentiation;BP:regulation of transport;BP:regulation of extrathymic T cell differentiation;BP:regulation of alpha-beta T cell activation;BP:cell development;BP:signal transduction;BP:regulation of ion transmembrane transport;BP:negative…	GO:0080090;GO:0019222;GO:0034110;GO:0046637;GO:0051049;GO:0033082;GO:0046634;GO:0048468;GO:0007165;GO:0034765;GO:0034766;GO:1901362;GO:1901360;GO:0034763;GO:0010605;GO:0010604;GO:0009968;GO:0009966;GO:0048869;GO:0048514;GO:0048583;GO:0044092;GO:0048518;GO:0065007;GO:0031324;GO:0002066;GO:0048585;GO:0002064;GO:1901020;GO:0042127;GO:1901385;GO:0051051;GO:0060255;GO:0010959;GO:0006952;GO:0007281;GO:…	K07847	REM1	------	------	COG1100	R:General function prediction only	PF00071.19;PF08477.10	Ras;Roc	Ras family;Ras of Complex, Roc, domain of DAPkinase	cytoplasmic	1	4	32.9	High
P14174	Macrophage migration inhibitory factor OS=Homo sapiens OX=9606 GN=MIF PE=1 SV=4	2.02982	1.02135	0.007024	up	yes	2.042	1.006	BP:regulation of secretion;BP:positive regulation of secretion;BP:regulation of transport;BP:small molecule metabolic process;BP:small molecule biosynthetic process;BP:regulation of phosphate metabolic process;BP:cellular response to stimulus;BP:regulation of apoptotic signaling pathway;BP:primary amino compound metabolic process;BP:primary amino compound biosynthetic process;BP:aminergic neurotr…	GO:0051046;GO:0051047;GO:0051049;GO:0044281;GO:0044283;GO:0019220;GO:0051716;GO:2001233;GO:1901160;GO:1901162;GO:0015842;GO:0060548;GO:0045859;GO:0046483;GO:0042325;GO:0042327;GO:0002702;GO:0090342;GO:0090344;GO:0009893;GO:0002700;GO:0050671;GO:0071902;GO:0051222;GO:0051223;GO:0072331;GO:0072330;GO:0051347;GO:0006887;GO:0002684;GO:0002685;GO:0002682;GO:0071840;GO:0002688;GO:0018130;GO:0070201;GO:…	K07253	MIF	hsa00350;hsa00360	Tyrosine metabolism;Phenylalanine metabolism	------	------	PF01187.15	MIF	Macrophage migration inhibitory factor	cytoplasmic	2	26	12.5	High
Q9HCE1	Helicase MOV-10 OS=Homo sapiens OX=9606 GN=MOV10 PE=1 SV=2	1.93567	0.952835	0.000725	up	yes	1.986	1.026	BP:regulation of primary metabolic process;BP:regulation of metabolic process;BP:signal transduction;BP:cell surface receptor signaling pathway;BP:organic cyclic compound biosynthetic process;BP:cellular component organization or biogenesis;BP:RNA biosynthetic process;BP:negative regulation of macromolecule metabolic process;BP:posttranscriptional regulation of gene expression;BP:regulation of ge…	GO:0080090;GO:0019222;GO:0007165;GO:0007166;GO:1901362;GO:0071840;GO:0032774;GO:0010605;GO:0010608;GO:0040029;GO:0016458;GO:0048519;GO:0097576;GO:0060255;GO:0090501;GO:2001141;GO:0035279;GO:1903706;GO:0035567;GO:0046483;GO:0016197;GO:0016192;GO:0016055;GO:0016441;GO:0019438;GO:0006379;GO:0009892;GO:0009890;GO:0010629;GO:0035556;GO:0050789;GO:1901576;GO:0044260;GO:0016043;GO:0065007;GO:1901360;GO:…	K18422	MOV10	------	------	COG1112	L:Replication, recombination and repair	PF13087.3;PF13086.3;PF13604.3;PF13245.3;PF04851.12	AAA_12;AAA_11;AAA_30;AAA_19;ResIII	AAA domain;AAA domain;AAA domain;Part of AAA domain;Type III restriction enzyme, res subunit	cytoplasmic	2	2	113.6	High
P02675	Fibrinogen beta chain OS=Homo sapiens OX=9606 GN=FGB PE=1 SV=2	1.79434	0.843453	0.02486	up	yes	1.902	1.06	BP:negative regulation of apoptotic signaling pathway;BP:positive regulation of heterotypic cell-cell adhesion;BP:regulation of extrinsic apoptotic signaling pathway;BP:negative regulation of extrinsic apoptotic signaling pathway;BP:hemostasis;BP:regulation of secretion;BP:regulation of apoptotic signaling pathway;BP:regulation of transport;BP:negative regulation of response to stimulus;BP:blood …	GO:2001234;GO:0034116;GO:2001236;GO:2001237;GO:0007599;GO:0051046;GO:2001233;GO:0051049;GO:0048585;GO:0007596;GO:0048583;GO:0019229;GO:0007160;GO:0034109;GO:0034114;GO:0007165;GO:0003018;GO:0019220;GO:0045055;GO:0071840;GO:0044320;GO:0051716;GO:0009968;GO:0045785;GO:0009966;GO:0009967;GO:0051047;GO:0071310;GO:0032268;GO:0010720;GO:0048518;GO:0048519;GO:0016192;GO:0042325;GO:0031589;GO:0048584;GO:…	K03904	FGB	hsa04611;hsa04610	Platelet activation;Complement and coagulation cascades	------	------	PF00147.15;PF08702.7	Fibrinogen_C;Fib_alpha	Fibrinogen beta and gamma chains, C-terminal globular domain;Fibrinogen alpha/beta chain family	ER	2	3	55.9	High
Q9UHI7	Solute carrier family 23 member 1 OS=Homo sapiens OX=9606 GN=SLC23A1 PE=1 SV=3	1.96211	0.972406	0.000862	up	yes	1.916	0.9765	BP:nuclear transport;BP:spliceosomal tri-snRNP complex assembly;BP:regulation of primary metabolic process;BP:regulation of metabolic process;BP:response to toxic substance;BP:cell development;BP:transepithelial transport;BP:female gamete generation;BP:anion transport;BP:small molecule metabolic process;BP:cellular component organization or biogenesis;BP:single-organism metabolic process;BP:negat…	GO:0051169;GO:0000244;GO:0080090;GO:0019222;GO:0009636;GO:0048468;GO:0070633;GO:0007292;GO:0006820;GO:0044281;GO:0071840;GO:0044710;GO:0010605;GO:0048869;GO:0043067;GO:0042981;GO:0048513;GO:0048518;GO:0048519;GO:0098662;GO:0042127;GO:0006767;GO:0006766;GO:0060255;GO:0015849;GO:0015711;GO:0007281;GO:0003006;GO:0070904;GO:2001141;GO:0043436;GO:0046483;GO:0044702;GO:0048477;GO:1903825;GO:0043068;GO:…	K14611	SLC23A1_2, SVCT1_2	------	------	COG2233	F:Nucleotide transport and metabolism	PF00860.17	Xan_ur_permease	Permease family	peroxisomal	1	2	64.8	Medium
Q8NGA1	Olfactory receptor 1M1 OS=Homo sapiens OX=9606 GN=OR1M1 PE=2 SV=1	1.83678	0.877175	0.001296	up	yes	1.868	1.017	BP:signal transduction;BP:detection of chemical stimulus involved in sensory perception;BP:detection of chemical stimulus;BP:regulation of biological process;BP:biological regulation;BP:G-protein coupled receptor signaling pathway;BP:multicellular organismal process;BP:sensory perception of smell;BP:neurological system process;BP:sensory perception of chemical stimulus;BP:sensory perception;BP:re…	GO:0007165;GO:0050907;GO:0009593;GO:0050789;GO:0065007;GO:0007186;GO:0032501;GO:0007608;GO:0050877;GO:0007606;GO:0007600;GO:0050794;GO:0050911;GO:0008150;GO:0003008;GO:0051606;GO:0050896;GO:0050906;GO:0031224;GO:0016021;GO:0016020;GO:0005886;GO:0044464;GO:0005575;GO:0044425;GO:0038023;GO:0060089;GO:0003674;GO:0004871;GO:0004930;GO:0004888;GO:0004984;GO:0099600;GO:0004872	K04257	OLFR	hsa04740	Olfactory transduction	------	------	PF13853.3;PF00001.18	7tm_4;7tm_1	Olfactory receptor;7 transmembrane receptor	plasma membrane	1	2	34.8	High
P08697	Alpha-2-antiplasmin OS=Homo sapiens OX=9606 GN=SERPINF2 PE=1 SV=3	1.68609	0.753682	0.01139	up	yes	1.794	1.064	BP:regulation of MAPK cascade;BP:exocytosis;BP:regulation of phosphate metabolic process;BP:regulation of primary metabolic process;BP:regulation of metabolic process;BP:negative regulation of response to stimulus;BP:positive regulation of response to stimulus;BP:regulation of response to stimulus;BP:circulatory system process;BP:renal system process;BP:vascular process in circulatory system;BP:c…	GO:0043408;GO:0006887;GO:0019220;GO:0080090;GO:0019222;GO:0048585;GO:0048584;GO:0048583;GO:0003013;GO:0003014;GO:0003018;GO:0071840;GO:0071636;GO:0032231;GO:0032233;GO:0010604;GO:0043207;GO:0045785;GO:0009966;GO:0051496;GO:0051495;GO:0032101;GO:0051493;GO:0051492;GO:0001817;GO:0048514;GO:0009967;GO:0032940;GO:0044092;GO:0048518;GO:0048519;GO:0002526;GO:0042127;GO:0060255;GO:0032269;GO:0046330;GO:…	K03983	SERPINF2, AAP	hsa04610	Complement and coagulation cascades	COG4826	O:Posttranslational modification, protein turnover, chaperones	PF00079.17	Serpin	Serpin	extracellular	1	2	54.5	Medium
Q4KWH8	1-phosphatidylinositol 4,5-bisphosphate phosphodiesterase eta-1 OS=Homo sapiens OX=9606 GN=PLCH1 PE=1 SV=1	1.68868	0.755895	0.01841	up	yes	1.79	1.06	BP:signal transduction;BP:polyol metabolic process;BP:regulation of biological process;BP:cellular metabolic process;BP:intracellular signal transduction;BP:single-organism process;BP:alcohol metabolic process;BP:single-organism metabolic process;BP:phosphatidylinositol-mediated signaling;BP:phosphate-containing compound metabolic process;BP:lipid catabolic process;BP:organic substance metabolic …	GO:0007165;GO:0019751;GO:0050789;GO:0044237;GO:0035556;GO:0044699;GO:0006066;GO:0044710;GO:0048015;GO:0006796;GO:0016042;GO:0071704;GO:0065007;GO:0019637;GO:0006629;GO:0009987;GO:1901575;GO:0050794;GO:0008150;GO:0008152;GO:0044712;GO:0009056;GO:0048017;GO:0044238;GO:0043647;GO:0006793;GO:0044763;GO:1901615;GO:0044281;GO:0005886;GO:0043229;GO:0043227;GO:0043226;GO:0005737;GO:0016020;GO:0043231;GO:…	K19006	PLCH	hsa00562	Inositol phosphate metabolism	------	------	PF00388.16;PF00387.16;PF09279.8;PF00168.27;PF13499.3;PF00036.29;PF16457.2;PF14788.3	PI-PLC-X;PI-PLC-Y;EF-hand_like;C2;EF-hand_7;EF-hand_1;PH_12;EF-hand_10	Phosphatidylinositol-specific phospholipase C, X domain;Phosphatidylinositol-specific phospholipase C, Y domain;Phosphoinositide-specific phospholipase C, efhand-like;C2 domain;EF-hand domain pair;EF hand;Pleckstrin homology domain;EF hand	nuclear	1	0	189.1	High
O60637	Tetraspanin-3 OS=Homo sapiens OX=9606 GN=TSPAN3 PE=2 SV=1	1.62977	0.704666	0.0238	up	yes	1.752	1.075	BP:cell surface receptor signaling pathway;BP:glial cell development;BP:cell projection organization;BP:cell differentiation;BP:cell development;BP:signal transduction;BP:glial cell differentiation;BP:neuron projection development;BP:ensheathment of neurons;BP:regulation of biological process;BP:cellular component organization or biogenesis;BP:myelination;BP:cellular developmental process;BP:myel…	GO:0007166;GO:0021782;GO:0030030;GO:0030154;GO:0048468;GO:0007165;GO:0010001;GO:0031175;GO:0007272;GO:0050789;GO:0071840;GO:0042552;GO:0048869;GO:0061515;GO:0016043;GO:0048513;GO:0065007;GO:0032502;GO:0061564;GO:0009987;GO:0048709;GO:0050794;GO:0044767;GO:0006950;GO:0044763;GO:0008366;GO:0006954;GO:0014002;GO:0014005;GO:0006952;GO:0044699;GO:0007420;GO:0050896;GO:0048856;GO:0008150;GO:0005887;GO:…	K17293	TSPAN3	------	------	------	------	PF00335.17	Tetraspannin	Tetraspanin family	plasma membrane	3	9	28	High
Q86VZ5	Phosphatidylcholine:ceramide cholinephosphotransferase 1 OS=Homo sapiens OX=9606 GN=SGMS1 PE=1 SV=3	1.94566	0.960262	0.01453	up	yes	1.862	0.957	BP:negative regulation of apoptotic signaling pathway;BP:regulation of extrinsic apoptotic signaling pathway;BP:negative regulation of extrinsic apoptotic signaling pathway;BP:regulation of metabolic process;BP:regulation of apoptotic signaling pathway;BP:negative regulation of response to stimulus;BP:regulation of response to stimulus;BP:small molecule metabolic process;BP:small molecule biosynt…	GO:2001234;GO:2001236;GO:2001237;GO:0019222;GO:2001233;GO:0048585;GO:0048583;GO:0044281;GO:0044283;GO:0044707;GO:0051716;GO:0044711;GO:0010604;GO:0009968;GO:0009966;GO:0043067;GO:0009612;GO:0048518;GO:0048519;GO:0006665;GO:0006684;GO:0060255;GO:0060548;GO:1901564;GO:0010035;GO:0010033;GO:0009607;GO:0009605;GO:0044249;GO:0031667;GO:0033555;GO:0006672;GO:0009414;GO:0023051;GO:0032496;GO:0050789;GO:…	K04714	SGMS	hsa04071;hsa00600	Sphingolipid signaling pathway;Sphingolipid metabolism	------	------	PF14360.3;PF01569.18	PAP2_C;PAP2	PAP2 superfamily C-terminal;PAP2 superfamily	cytoplasmic	1	2	48.6	Medium
Q9NS39	Double-stranded RNA-specific editase B2 OS=Homo sapiens OX=9606 GN=ADARB2 PE=1 SV=1	1.5855	0.66494	0.01753	up	yes	1.706	1.076	BP:regulation of primary metabolic process;BP:regulation of metabolic process;BP:organic cyclic compound biosynthetic process;BP:organic cyclic compound metabolic process;BP:negative regulation of macromolecule metabolic process;BP:response to external biotic stimulus;BP:response to virus;BP:regulation of gene expression, epigenetic;BP:negative regulation of biological process;BP:heterocycle meta…	GO:0080090;GO:0019222;GO:1901362;GO:1901360;GO:0010605;GO:0043207;GO:0009615;GO:0040029;GO:0048519;GO:0046483;GO:0060255;GO:2001141;GO:0051707;GO:0051704;GO:0009607;GO:0009605;GO:0019438;GO:0009892;GO:0009890;GO:0006807;GO:0050789;GO:0097659;GO:1901576;GO:0044260;GO:0065007;GO:0065009;GO:0018130;GO:0009889;GO:0050794;GO:0008150;GO:0008152;GO:0034654;GO:0016070;GO:0016071;GO:0044271;GO:0050896;GO:…	K13194	ADARB	------	------	------	------	PF02137.15;PF00035.23	A_deamin;dsrm	Adenosine-deaminase;Double-stranded RNA binding motif	mitochondrial	1	1	80.6	Medium
P60468	Protein transport protein Sec61 subunit beta OS=Homo sapiens OX=9606 GN=SEC61B PE=1 SV=2	1.65583	0.727556	0.02142	up	yes	1.732	1.046	BP:protein localization;BP:signal transduction;BP:cellular response to stimulus;BP:intracellular protein transmembrane transport;BP:macromolecule localization;BP:establishment of protein localization;BP:protein catabolic process;BP:endoplasmic reticulum unfolded protein response;BP:protein metabolic process;BP:cellular response to stress;BP:regulation of biological process;BP:organic substance ca…	GO:0008104;GO:0007165;GO:0051716;GO:0065002;GO:0033036;GO:0045184;GO:0030163;GO:0030968;GO:0019538;GO:0033554;GO:0050789;GO:1901575;GO:0044265;GO:0006886;GO:0030970;GO:0065007;GO:0044699;GO:0006810;GO:0050794;GO:0006950;GO:0008150;GO:0008152;GO:0051234;GO:0051603;GO:0046907;GO:0050896;GO:0010498;GO:0006511;GO:0030433;GO:0044248;GO:0071806;GO:0043161;GO:0009057;GO:0006508;GO:0009987;GO:0019941;GO:…	K09481	SEC61B, SBH2	hsa04141;hsa05110;hsa04145;hsa03060	Protein processing in endoplasmic reticulum;Vibrio cholerae infection;Phagosome;Protein export	------	------	PF03911.13	Sec61_beta	Sec61beta family	mitochondrial	1	10	10	High
O95390	Growth/differentiation factor 11 OS=Homo sapiens OX=9606 GN=GDF11 PE=1 SV=1	1.8639	0.898321	0.007163	up	yes	1.794	0.9625	BP:regulation of phosphate metabolic process;BP:regulation of primary metabolic process;BP:regulation of metabolic process;BP:positive regulation of response to stimulus;BP:cell development;BP:cell maturation;BP:spinal cord anterior/posterior patterning;BP:skeletal system development;BP:signal transduction;BP:positive regulation of macromolecule metabolic process;BP:regulation of signal transduct…	GO:0019220;GO:0080090;GO:0019222;GO:0048584;GO:0048468;GO:0048469;GO:0021512;GO:0001501;GO:0007165;GO:0010604;GO:0009966;GO:0048869;GO:0001822;GO:0045665;GO:0045664;GO:0048513;GO:0010721;GO:0048518;GO:0048519;GO:0042127;GO:0060255;GO:0048583;GO:0003002;GO:0065009;GO:0042325;GO:0044700;GO:0042327;GO:0044707;GO:0060395;GO:0060393;GO:0009893;GO:0010862;GO:0021700;GO:0050789;GO:0009653;GO:0090100;GO:…	K05497	GDF8_11	------	------	------	------	PF00688.15;PF00019.17	TGFb_propeptide;TGF_beta	TGF-beta propeptide;Transforming growth factor beta like domain	ER	1	1	45.1	Medium
A0A2R8YF87	Vacuolar protein sorting-associated protein 33A OS=Homo sapiens OX=9606 GN=VPS33A PE=1 SV=1	1.7336	0.793771	0.006989	up	yes	1.731	0.9985	------	------	------	------	------	------	COG5158	U:Intracellular trafficking, secretion, and vesicular transport	PF00995.20	Sec1	Sec1 family	cytoplasmic	1	1	71.7	Medium
A0A1B0GVV9	Syntaxin-binding protein 1 OS=Homo sapiens OX=9606 GN=STXBP1 PE=1 SV=1	1.71688	0.779786	0.000308	up	yes	1.704	0.9925	BP:vesicle docking involved in exocytosis;BP:cellular process;BP:membrane docking;BP:vesicle docking;BP:single-organism cellular process;BP:biological_process;BP:single-organism process;MF:molecular_function;MF:binding;MF:nucleic acid binding;MF:DNA binding;MF:organic cyclic compound binding;MF:heterocyclic compound binding;	GO:0006904;GO:0009987;GO:0022406;GO:0048278;GO:0044763;GO:0008150;GO:0044699;GO:0003674;GO:0005488;GO:0003676;GO:0003677;GO:0097159;GO:1901363	K15292	STXBP1, MUNC18-1	hsa04721	Synaptic vesicle cycle	------	------	PF00995.20	Sec1	Sec1 family	nuclear	1	21	12.7	Medium
P61604	10 kDa heat shock protein, mitochondrial OS=Homo sapiens OX=9606 GN=HSPE1 PE=1 SV=2	1.65381	0.725792	0.000292	up	yes	1.672	1.011	BP:regulation of primary metabolic process;BP:regulation of metabolic process;BP:response to unfolded protein;BP:positive regulation of macromolecule metabolic process;BP:cellular developmental process;BP:positive regulation of molecular function;BP:regulation of cysteine-type endopeptidase activity involved in apoptotic process;BP:positive regulation of cysteine-type endopeptidase activity invol…	GO:0080090;GO:0019222;GO:0006986;GO:0010604;GO:0048869;GO:0044093;GO:0043281;GO:0043280;GO:0060255;GO:0030162;GO:0010033;GO:0019538;GO:0006457;GO:0009893;GO:0006458;GO:0051345;GO:0006919;GO:0065007;GO:0043085;GO:0065009;GO:0050790;GO:0050794;GO:0006950;GO:0008150;GO:0008152;GO:0061077;GO:0051336;GO:0051604;GO:0050896;GO:0030154;GO:0042221;GO:0044699;GO:0010952;GO:0051084;GO:0051085;GO:0051246;GO:…	K04078	groES, HSPE1	------	------	COG0234	O:Posttranslational modification, protein turnover, chaperones	PF00166.18	Cpn10	Chaperonin 10 Kd subunit	cytoplasmic	6	81	10.9	High
Q9UFH2	Dynein heavy chain 17, axonemal OS=Homo sapiens OX=9606 GN=DNAH17 PE=1 SV=3	1.52875	0.612349	0.01162	up	yes	1.622	1.061	BP:microtubule-based movement;BP:cilium or flagellum-dependent cell motility;BP:movement of cell or subcellular component;BP:cilium-dependent cell motility;BP:single-organism process;BP:cilium movement;BP:cellular process;BP:single-organism cellular process;BP:locomotion;BP:microtubule-based process;BP:cell motility;BP:biological_process;CC:supramolecular fiber;CC:organelle;CC:intracellular organ…	GO:0007018;GO:0001539;GO:0006928;GO:0060285;GO:0044699;GO:0003341;GO:0009987;GO:0044763;GO:0040011;GO:0007017;GO:0048870;GO:0008150;GO:0099512;GO:0043226;GO:0043229;GO:0043228;GO:0005929;GO:0030286;GO:0005874;GO:0099513;GO:0005737;GO:0044446;GO:0044447;GO:0031514;GO:0005858;GO:0005875;GO:0044430;GO:1902494;GO:0042995;GO:0005930;GO:0043234;GO:0032991;GO:0043232;GO:0044463;GO:0044464;GO:0005575;GO:…	K10408	DNAH	hsa05016	Huntington's disease	COG5245	Z:Cytoskeleton	PF03028.12;PF12777.4;PF12775.4;PF12780.4;PF08385.9;PF12774.4;PF08393.10;PF12781.4;PF07728.11	Dynein_heavy;MT;AAA_7;AAA_8;DHC_N1;AAA_6;DHC_N2;AAA_9;AAA_5	Dynein heavy chain and region D6 of dynein motor;Microtubule-binding stalk of dynein motor;P-loop containing dynein motor region D3;P-loop containing dynein motor region D4;Dynein heavy chain, N-terminal region 1;Hydrolytic ATP binding site of dynein motor region D1;Dynein heavy chain, N-terminal region 2;ATP-binding dynein motor region D5;AAA domain	cytoplasmic	1	0	509	High
P50914	60S ribosomal protein L14 OS=Homo sapiens OX=9606 GN=RPL14 PE=1 SV=4	1.53964	0.62259	0.007097	up	yes	1.612	1.047	BP:protein localization;BP:membrane organization;BP:organic cyclic compound biosynthetic process;BP:cellular component organization or biogenesis;BP:organic cyclic compound catabolic process;BP:cellular macromolecule localization;BP:peptide biosynthetic process;BP:macromolecule localization;BP:rRNA processing;BP:ncRNA processing;BP:protein targeting;BP:establishment of protein localization;BP:pro…	GO:0008104;GO:0061024;GO:1901362;GO:0071840;GO:1901361;GO:0070727;GO:0043043;GO:0033036;GO:0006364;GO:0034470;GO:0006605;GO:0045184;GO:0072657;GO:0046483;GO:1901566;GO:0019538;GO:0019438;GO:0006613;GO:0006612;GO:0006614;GO:0006807;GO:0034660;GO:1901576;GO:1901575;GO:0044265;GO:0044260;GO:0006886;GO:0016043;GO:1901360;GO:0018130;GO:0006810;GO:0046700;GO:0019439;GO:0008150;GO:0008152;GO:0034654;GO:…	K02875	RP-L14e, RPL14	hsa03010	Ribosome	COG2163	J:Translation, ribosomal structure and biogenesis	PF01929.14	Ribosomal_L14e	Ribosomal protein L14	cytoplasmic	5	24	23.4	High
Q9UBQ6	Exostosin-like 2 OS=Homo sapiens OX=9606 GN=EXTL2 PE=1 SV=1	1.49229	0.577531	0.009908	up	yes	1.549	1.038	BP:regulation of metabolic process;BP:single-organism metabolic process;BP:signal transduction;BP:organic cyclic compound metabolic process;BP:regulation of primary metabolic process;BP:cellular response to stimulus;BP:single-organism biosynthetic process;BP:UDP-N-acetylgalactosamine metabolic process;BP:posttranscriptional regulation of gene expression;BP:protein metabolic process;BP:regulation …	GO:0019222;GO:0044710;GO:0007165;GO:1901360;GO:0080090;GO:0051716;GO:0044711;GO:0019276;GO:0010608;GO:0019538;GO:0060255;GO:0006446;GO:0030166;GO:0043436;GO:1901564;GO:0046483;GO:0030968;GO:0006040;GO:0006044;GO:0010468;GO:0033554;GO:1901071;GO:0044281;GO:0030203;GO:0030201;GO:0006807;GO:0050789;GO:1901576;GO:0015012;GO:0065007;GO:0044699;GO:0006139;GO:0009889;GO:0050794;GO:0006950;GO:0008150;GO:…	K02369	EXTL2	hsa00534	Glycosaminoglycan biosynthesis - heparan sulfate / heparin	------	------	PF09258.7	Glyco_transf_64	Glycosyl transferase family 64 domain	ER	1	6	37.4	Medium
Q5RI15	Cytochrome c oxidase assembly protein COX20, mitochondrial OS=Homo sapiens OX=9606 GN=COX20 PE=1 SV=2	1.55391	0.6359	0.02477	up	yes	1.571	1.011	BP:mitochondrial respiratory chain complex IV assembly;BP:cellular component assembly;BP:protein complex biogenesis;BP:macromolecular complex subunit organization;BP:cytochrome complex assembly;BP:aerobic respiration;BP:cellular macromolecular complex assembly;BP:generation of precursor metabolites and energy;BP:respiratory chain complex IV assembly;BP:single-organism metabolic process;BP:protein…	GO:0033617;GO:0022607;GO:0070271;GO:0043933;GO:0017004;GO:0009060;GO:0034622;GO:0006091;GO:0008535;GO:0044710;GO:0071822;GO:0016043;GO:0065003;GO:0071840;GO:0044763;GO:0033108;GO:0009987;GO:0045333;GO:0006461;GO:0008150;GO:0008152;GO:0043623;GO:0055114;GO:0015980;GO:0044699;GO:0044237;GO:0097034;GO:0044085;GO:0019866;GO:0043229;GO:0005739;GO:0043227;GO:0043226;GO:0031224;GO:0044446;GO:0031090;GO:…	K18184	COX20	------	------	------	------	PF12597.5	DUF3767	Protein of unknown function	cytoplasmic	2	22	13.3	High
P02042	Hemoglobin subunit delta OS=Homo sapiens OX=9606 GN=HBD PE=1 SV=2	1.62278	0.698464	0.00705	up	yes	1.596	0.9835	BP:hemostasis;BP:blood coagulation;BP:single-organism process;BP:biological regulation;BP:regulation of biological quality;BP:oxygen transport;BP:multicellular organismal process;BP:regulation of body fluid levels;BP:transport;BP:single-organism transport;BP:coagulation;BP:biological_process;BP:establishment of localization;BP:localization;BP:single-organism localization;BP:single-multicellular o…	GO:0007599;GO:0007596;GO:0044699;GO:0065007;GO:0065008;GO:0015671;GO:0032501;GO:0050878;GO:0006810;GO:0044765;GO:0050817;GO:0008150;GO:0051234;GO:0051179;GO:1902578;GO:0044707;GO:0015669;GO:0072562;GO:0005833;GO:0043234;GO:0032991;GO:0005829;GO:0044464;GO:0005575;GO:0044444;GO:0044445;GO:0044424;GO:0044421;GO:0005344;GO:0046872;GO:0003674;GO:0005488;GO:0043167;GO:1901363;GO:0043169;GO:0020037;GO:…	K16151	HBD	------	------	COG1018	C:Energy production and conversion	PF00042.19	Globin	Globin	cytoplasmic	2	13	16	High
P00403	Cytochrome c oxidase subunit 2 OS=Homo sapiens OX=9606 GN=MT-CO2 PE=1 SV=1	1.57394	0.654376	0.01899	up	yes	1.57	0.9975	BP:regulation of phosphate metabolic process;BP:regulation of primary metabolic process;BP:regulation of metabolic process;BP:lactation;BP:regulation of ATP metabolic process;BP:small molecule metabolic process;BP:ribonucleoside monophosphate metabolic process;BP:positive regulation of nucleotide metabolic process;BP:organic cyclic compound metabolic process;BP:single-organism metabolic process;B…	GO:0019220;GO:0080090;GO:0019222;GO:0007595;GO:1903578;GO:0044281;GO:0009161;GO:0045981;GO:1901360;GO:0044710;GO:0010310;GO:0071704;GO:0010726;GO:0009199;GO:0022900;GO:0022904;GO:0048518;GO:0010728;GO:0098662;GO:0009205;GO:0046034;GO:1901564;GO:0046128;GO:0055114;GO:0046483;GO:0044707;GO:0009167;GO:1900373;GO:1900371;GO:0006163;GO:0010939;GO:0009893;GO:0009891;GO:0006123;GO:0009144;GO:0032941;GO:…	K02261	COX2	hsa00190;hsa04260;hsa04932;hsa05016;hsa05010;hsa05012	Oxidative phosphorylation;Cardiac muscle contraction;Non-alcoholic fatty liver diseas;Huntington's disease;Alzheimer's disease;Parkinson's disease	COG1622	C:Energy production and conversion	PF00116.17;PF02790.12	COX2;COX2_TM	Cytochrome C oxidase subunit II, periplasmic domain;Cytochrome C oxidase subunit II, transmembrane domain	peroxisomal	6	31	25.5	High
P58557	Endoribonuclease YbeY OS=Homo sapiens OX=9606 GN=YBEY PE=1 SV=2	1.64997	0.722443	0.004809	up	yes	1.598	0.9685	BP:nucleic acid metabolic process;BP:nucleic acid phosphodiester bond hydrolysis;BP:nitrogen compound metabolic process;BP:ncRNA metabolic process;BP:ncRNA processing;BP:cellular macromolecule metabolic process;BP:organic substance metabolic process;BP:organic cyclic compound metabolic process;BP:proteolysis;BP:rRNA processing;BP:nucleobase-containing compound metabolic process;BP:cellular proces…	GO:0090304;GO:0090305;GO:0006807;GO:0034660;GO:0034470;GO:0044260;GO:0071704;GO:1901360;GO:0006508;GO:0006364;GO:0006139;GO:0009987;GO:0006725;GO:0008150;GO:0008152;GO:0046483;GO:0016070;GO:0044238;GO:0016072;GO:0034641;GO:0044237;GO:0043170;GO:0019538;GO:0006396;GO:0043229;GO:0043227;GO:0043226;GO:0044446;GO:0005634;GO:0005739;GO:0005654;GO:0043231;GO:0044464;GO:0005575;GO:0044444;GO:0044428;GO:…	------	------	------	------	COG0319	R:General function prediction only	PF02130.14	UPF0054	Uncharacterized protein family UPF0054	mitochondrial	2	11	19.3	High
Q9Y3L5	Ras-related protein Rap-2c OS=Homo sapiens OX=9606 GN=RAP2C PE=1 SV=1	1.36624	0.450207	0.04821	up	yes	1.481	1.084	BP:exocytosis;BP:regulation of phosphate metabolic process;BP:regulation of primary metabolic process;BP:regulation of metabolic process;BP:cell development;BP:signal transduction;BP:establishment of endothelial barrier;BP:cellular component organization or biogenesis;BP:positive regulation of macromolecule metabolic process;BP:cellular developmental process;BP:positive regulation of biological p…	GO:0006887;GO:0019220;GO:0080090;GO:0019222;GO:0048468;GO:0007165;GO:0061028;GO:0071840;GO:0010604;GO:0048869;GO:0048518;GO:0065007;GO:0002064;GO:0060255;GO:0061097;GO:2001141;GO:0016192;GO:0042325;GO:0042327;GO:0050730;GO:0002274;GO:0050789;GO:0022607;GO:0009893;GO:0031954;GO:0031952;GO:0045321;GO:0030334;GO:0090557;GO:0002283;GO:0043549;GO:0045055;GO:0016043;GO:0002366;GO:0065009;GO:0006810;GO:…	K07839	RAP2C	hsa04530	Tight junction	COG1100	R:General function prediction only	PF00071.19;PF08477.10;PF00025.18;PF03193.13	Ras;Roc;Arf;DUF258	Ras family;Ras of Complex, Roc, domain of DAPkinase;ADP-ribosylation factor family;Protein of unknown function, DUF258	cytoplasmic	1	38	20.7	High
P68366	Tubulin alpha-4A chain OS=Homo sapiens OX=9606 GN=TUBA4A PE=1 SV=1	1.47864	0.564272	0.00719	up	yes	1.523	1.03	BP:G2/M transition of mitotic cell cycle;BP:cellular component organization or biogenesis;BP:vesicle-mediated transport;BP:regulation of biological process;BP:ciliary basal body docking;BP:regulation of mitotic cell cycle;BP:exocytosis;BP:cellular component organization;BP:regulated exocytosis;BP:biological regulation;BP:transport;BP:regulation of cellular process;BP:biological_process;BP:establi…	GO:0000086;GO:0071840;GO:0016192;GO:0050789;GO:0097711;GO:0007346;GO:0006887;GO:0016043;GO:0045055;GO:0065007;GO:0006810;GO:0050794;GO:0008150;GO:0051234;GO:0046903;GO:1901987;GO:1901990;GO:0044699;GO:0010564;GO:0051179;GO:0009987;GO:0032940;GO:0044839;GO:1903047;GO:0044770;GO:0044772;GO:0022402;GO:0002576;GO:0044765;GO:0044763;GO:0010389;GO:1902578;GO:0006996;GO:0007017;GO:0007010;GO:0051726;GO:…	K07374	TUBA	hsa04530;hsa04210;hsa05130;hsa04145;hsa04540	Tight junction;Apoptosis;Pathogenic Escherichia coli infection;Phagosome;Gap junction	COG5023	Z:Cytoskeleton	PF00091.22;PF03953.14	Tubulin;Tubulin_C	Tubulin/FtsZ family, GTPase domain;Tubulin C-terminal domain	cytoplasmic	8	69	49.9	High
O00148	ATP-dependent RNA helicase DDX39A OS=Homo sapiens OX=9606 GN=DDX39A PE=1 SV=2	1.47185	0.557625	0.01071	up	yes	1.516	1.03	BP:negative regulation of apoptotic signaling pathway;BP:nuclear transport;BP:nuclear export;BP:establishment of localization;BP:negative regulation of membrane depolarization;BP:regulation of metabolic process;BP:regulation of apoptotic signaling pathway;BP:regulation of transport;BP:regulation of intracellular transport;BP:positive regulation of response to stimulus;BP:regulation of response to…	GO:2001234;GO:0051169;GO:0051168;GO:0051234;GO:1904180;GO:0019222;GO:2001233;GO:0051049;GO:0032386;GO:0048584;GO:0048583;GO:0007610;GO:0007611;GO:0030111;GO:0001503;GO:0043524;GO:0007165;GO:0007166;GO:0030500;GO:0030501;GO:1901362;GO:1901360;GO:0032774;GO:0071705;GO:0051716;GO:1903910;GO:0045786;GO:0045787;GO:0009968;GO:0009966;GO:0009967;GO:0048869;GO:0048518;GO:0048519;GO:0048731;GO:0046483;GO:…	K13182	DDX39	------	------	COG0513	L:Replication, recombination and repair	PF00270.26;PF00271.28;PF14617.3;PF04851.12	DEAD;Helicase_C;CMS1;ResIII	DEAD/DEAH box helicase;Helicase conserved C-terminal domain;U3-containing 90S pre-ribosomal complex subunit;Type III restriction enzyme, res subunit	cytoplasmic	7	54	49.1	High
Q9H5X1	Cytosolic iron-sulfur assembly component 2A OS=Homo sapiens OX=9606 GN=CIAO2A PE=1 SV=1	1.55377	0.635772	0.03004	up	yes	1.546	0.995	BP:cellular component assembly;BP:cellular biosynthetic process;BP:cellular component organization or biogenesis;BP:cofactor metabolic process;BP:cofactor biosynthetic process;BP:cellular component organization;BP:single-organism process;BP:cellular process;BP:iron-sulfur cluster assembly;BP:biosynthetic process;BP:biological_process;BP:metabolic process;BP:chromosome segregation;BP:metallo-sulfu…	GO:0022607;GO:0044249;GO:0071840;GO:0051186;GO:0051188;GO:0016043;GO:0044699;GO:0009987;GO:0016226;GO:0009058;GO:0008150;GO:0008152;GO:0007059;GO:0031163;GO:0044237;GO:0044763;GO:0043229;GO:0043227;GO:0043226;GO:0005737;GO:0044446;GO:0005634;GO:0016020;GO:0005654;GO:0044425;GO:0005886;GO:0043231;GO:0005829;GO:0044464;GO:0031224;GO:0005575;GO:0044444;GO:0005576;GO:0044428;GO:0044424;GO:0016021;GO:…	------	------	------	------	COG5133	S:Function unknown	PF01883.16	DUF59	Domain of unknown function DUF59	extracellular	2	13	18.3	High
P62304	Small nuclear ribonucleoprotein E OS=Homo sapiens OX=9606 GN=SNRPE PE=1 SV=1	1.59632	0.674751	0.01556	up	yes	1.562	0.9785	BP:nuclear transport;BP:spliceosomal complex assembly;BP:organic cyclic compound biosynthetic process;BP:cellular component organization or biogenesis;BP:macromolecular complex assembly;BP:heterocycle metabolic process;BP:single-multicellular organism process;BP:mRNA splicing, via spliceosome;BP:aromatic compound biosynthetic process;BP:cellular component assembly;BP:nitrogen compound metabolic p…	GO:0051169;GO:0000245;GO:1901362;GO:0071840;GO:0065003;GO:0046483;GO:0044707;GO:0000398;GO:0019438;GO:0022607;GO:0006807;GO:1901576;GO:0000387;GO:0044260;GO:0016043;GO:1901360;GO:0006369;GO:0018130;GO:0006810;GO:0008150;GO:0008152;GO:0034654;GO:0051234;GO:0042303;GO:0016070;GO:0016071;GO:0044271;GO:0046907;GO:0000377;GO:0006353;GO:0032774;GO:0008334;GO:0044249;GO:0034641;GO:0044699;GO:0006139;GO:…	K11097	SNRPE, SME	hsa03040	Spliceosome	COG1958	K:Transcription	PF01423.19	LSM	LSM domain	mitochondrial	4	65	10.8	High
O95445	Apolipoprotein M OS=Homo sapiens OX=9606 GN=APOM PE=1 SV=2	1.58211	0.661845	0.00083	up	yes	1.556	0.9835	BP:negative regulation of lipoprotein oxidation;BP:regulation of lipoprotein oxidation;BP:negative regulation of plasma lipoprotein particle oxidation;BP:regulation of plasma lipoprotein particle oxidation;BP:regulation of metabolic process;BP:anion transport;BP:inorganic ion homeostasis;BP:cellular lipid metabolic process;BP:cellular component organization or biogenesis;BP:regulation of primary …	GO:0034443;GO:0034442;GO:0034445;GO:0034444;GO:0019222;GO:0006820;GO:0098771;GO:0044255;GO:0071840;GO:0080090;GO:0044710;GO:0010605;GO:0071704;GO:0098869;GO:0016101;GO:0048519;GO:0019725;GO:0034367;GO:0060255;GO:0034369;GO:1990748;GO:0043691;GO:0010033;GO:0044707;GO:0034284;GO:0019538;GO:0048878;GO:0009792;GO:0034377;GO:0034375;GO:0022607;GO:0009892;GO:0015918;GO:0015850;GO:0014070;GO:0098754;GO:…	------	------	------	------	------	------	PF11032.5	ApoM	ApoM domain	lysosomal	2	7	21.2	High
H7C1N3	BET1 homolog (Fragment) OS=Homo sapiens OX=9606 GN=BET1 PE=1 SV=1	1.6219	0.697686	0.01082	up	yes	1.57	0.968	BP:COPII vesicle coating;BP:cellular component assembly;BP:macromolecular complex subunit organization;BP:vesicle fusion;BP:vesicle coating;BP:membrane fusion;BP:membrane organization;BP:protein localization;BP:single-organism membrane organization;BP:cellular component organization or biogenesis;BP:protein complex subunit organization;BP:cellular component organization;BP:macromolecular complex …	GO:0048208;GO:0022607;GO:0043933;GO:0006906;GO:0006901;GO:0061025;GO:0061024;GO:0008104;GO:0044802;GO:0071840;GO:0071822;GO:0016043;GO:0065003;GO:0044699;GO:0006810;GO:0033036;GO:0009987;GO:0006461;GO:0045184;GO:0015031;GO:0044763;GO:0071702;GO:0044801;GO:0051234;GO:0051179;GO:0006996;GO:0090174;GO:0016050;GO:0048280;GO:1902589;GO:0048284;GO:0008150;GO:0005789;GO:0043229;GO:0031201;GO:0030133;GO:…	K08504	BET1	hsa04130	SNARE interactions in vesicular transport	------	------	------	------	------	cytoplasmic	1	14	15	High
Q969M3	Protein YIPF5 OS=Homo sapiens OX=9606 GN=YIPF5 PE=1 SV=1	1.51639	0.600636	0.004833	up	yes	1.527	1.007	BP:protein localization;BP:regulation of transport;BP:regulation of intracellular transport;BP:cellular component organization or biogenesis;BP:macromolecule localization;BP:establishment of protein localization;BP:vesicle-mediated transport;BP:single organism reproductive process;BP:response to external stimulus;BP:cellular component assembly;BP:cellular component organization;BP:biological regu…	GO:0008104;GO:0051049;GO:0032386;GO:0071840;GO:0033036;GO:0045184;GO:0016192;GO:0044702;GO:0009605;GO:0022607;GO:0016043;GO:0065007;GO:0007416;GO:1903649;GO:0006810;GO:0050794;GO:0008150;GO:0051234;GO:0051606;GO:0050896;GO:0050962;GO:0050808;GO:0009314;GO:0009416;GO:0044699;GO:0060628;GO:0048609;GO:0009987;GO:0060627;GO:0032879;GO:0060341;GO:0050906;GO:0050908;GO:0007276;GO:0050789;GO:0071702;GO:…	K20363	YIP1, YIPF5	------	------	COG5080	U:Intracellular trafficking, secretion, and vesicular transport	PF04893.14	Yip1	Yip1 domain	cytoplasmic	2	8	28	High
P51571	Translocon-associated protein subunit delta OS=Homo sapiens OX=9606 GN=SSR4 PE=1 SV=1	1.60762	0.684927	0.03299	up	yes	1.561	0.971	BP:glycolytic process from galactose;BP:glycolytic process through glucose-1-phosphate;BP:glycolytic process through glucose-6-phosphate;BP:small molecule metabolic process;BP:small molecule catabolic process;BP:ribonucleoside monophosphate metabolic process;BP:organic cyclic compound metabolic process;BP:single-organism catabolic process;BP:single-organism metabolic process;BP:organic substance …	GO:0061623;GO:0061622;GO:0061620;GO:0044281;GO:0044282;GO:0009161;GO:1901360;GO:0044712;GO:0044710;GO:0071704;GO:0009199;GO:0006733;GO:0009205;GO:0046034;GO:0046031;GO:0032787;GO:0043436;GO:1901564;GO:0046128;GO:0009179;GO:0046483;GO:0009167;GO:0016052;GO:0006163;GO:0006165;GO:0019637;GO:0019320;GO:0009141;GO:0009144;GO:0006807;GO:0046496;GO:1901575;GO:0051186;GO:0044262;GO:0006059;GO:0019400;GO:…	K04571	SSR4	hsa04141	Protein processing in endoplasmic reticulum	------	------	PF05404.9	TRAP-delta	Translocon-associated protein, delta subunit precursor	ER	4	31	19	High
O60831	PRA1 family protein 2 OS=Homo sapiens OX=9606 GN=PRAF2 PE=1 SV=1	1.72722	0.788455	0.01153	up	yes	1.602	0.9275	BP:protein localization;BP:anion transport;BP:cellular macromolecule localization;BP:intracellular protein transmembrane transport;BP:macromolecule localization;BP:organic acid transport;BP:organic anion transport;BP:establishment of protein localization;BP:dicarboxylic acid transport;BP:establishment of protein localization to mitochondrion;BP:mitochondrial transport;BP:protein localization to m…	GO:0008104;GO:0006820;GO:0070727;GO:0065002;GO:0033036;GO:0015849;GO:0015711;GO:0045184;GO:0006835;GO:0072655;GO:0006839;GO:0070585;GO:0006886;GO:0006811;GO:0006626;GO:0006810;GO:0008150;GO:0051234;GO:0046907;GO:0072594;GO:0006865;GO:0030150;GO:0044699;GO:0071806;GO:0046942;GO:0017038;GO:0015807;GO:0015800;GO:0055085;GO:0044743;GO:0033365;GO:0015813;GO:0071705;GO:1990542;GO:0071702;GO:0009987;GO:…	K20392	PRAF2	------	------	------	------	PF03208.16	PRA1	PRA1 family protein	ER	3	22	19.2	High
Q8N5I2	Arrestin domain-containing protein 1 OS=Homo sapiens OX=9606 GN=ARRDC1 PE=1 SV=1	1.61698	0.693299	0.01235	up	yes	1.562	0.966	BP:protein localization;BP:negative regulation of response to stimulus;BP:regulation of response to stimulus;BP:signal transduction;BP:signal transduction by protein phosphorylation;BP:cellular response to stimulus;BP:negative regulation of signal transduction;BP:regulation of signal transduction;BP:protein modification by small protein conjugation or removal;BP:protein modification by small prot…	GO:0008104;GO:0048585;GO:0048583;GO:0007165;GO:0023014;GO:0051716;GO:0009968;GO:0009966;GO:0070647;GO:0032446;GO:0048519;GO:0033036;GO:0045184;GO:0019538;GO:0000165;GO:0016567;GO:0033554;GO:0035556;GO:0050789;GO:0044267;GO:1901575;GO:0044265;GO:0044260;GO:0065007;GO:0006810;GO:0044710;GO:0050794;GO:0043412;GO:0036211;GO:0008150;GO:0008152;GO:0051234;GO:0051603;GO:0050896;GO:0006950;GO:0006511;GO:…	------	------	------	------	------	------	PF02752.19;PF00339.26	Arrestin_C;Arrestin_N	Arrestin;Arrestin	cytoplasmic	1	1	46	Medium
P08670	Vimentin OS=Homo sapiens OX=9606 GN=VIM PE=1 SV=4	1.36817	0.452251	0.02506	up	yes	1.453	1.062	BP:positive regulation of cellular amide metabolic process;BP:cytokine-mediated signaling pathway;BP:regulation of metabolic process;BP:cell development;BP:membrane fusion;BP:membrane organization;BP:signal transduction;BP:cell surface receptor signaling pathway;BP:negative regulation of cell projection organization;BP:cellular response to stimulus;BP:positive regulation of macromolecule metaboli…	GO:0034250;GO:0019221;GO:0019222;GO:0048468;GO:0061025;GO:0061024;GO:0007165;GO:0007166;GO:0031345;GO:0051716;GO:0010604;GO:0048869;GO:0044419;GO:0045664;GO:0044650;GO:0010721;GO:0048518;GO:0048519;GO:0007010;GO:0002064;GO:0030154;GO:0060255;GO:0030049;GO:0030048;GO:0010977;GO:0010975;GO:0010033;GO:0051704;GO:0045727;GO:0016192;GO:0032965;GO:0060395;GO:0045104;GO:0045103;GO:0009893;GO:0021782;GO:…	K07606	VIM	hsa05206;hsa05169	MicroRNAs in cancer;Epstein-Barr virus infection	------	------	PF00038.18;PF04732.11	Filament;Filament_head	Intermediate filament protein;Intermediate filament head	cytoplasmic	34	79	53.6	High
D6RJB7	Ankyrin repeat domain-containing protein 31 OS=Homo sapiens OX=9606 GN=ANKRD31 PE=4 SV=2	1.36604	0.449997	0.02331	up	yes	1.448	1.06	------	------	------	------	------	------	------	------	PF12796.4;PF13857.3;PF13606.3;PF00023.27;PF13637.3	Ank_2;Ank_5;Ank_3;Ank;Ank_4	Ankyrin repeats;Ankyrin repeats;Ankyrin repeat;Ankyrin repeat;Ankyrin repeats	nuclear	1	0	217.4	High
P03891	NADH-ubiquinone oxidoreductase chain 2 OS=Homo sapiens OX=9606 GN=MT-ND2 PE=1 SV=2	1.47483	0.560546	0.002912	up	yes	1.494	1.013	BP:cellular component assembly;BP:reactive oxygen species metabolic process;BP:protein complex biogenesis;BP:macromolecular complex subunit organization;BP:cellular macromolecular complex assembly;BP:generation of precursor metabolites and energy;BP:cellular component organization or biogenesis;BP:single-organism metabolic process;BP:protein complex subunit organization;BP:mitochondrial respirato…	GO:0022607;GO:0072593;GO:0070271;GO:0043933;GO:0034622;GO:0006091;GO:0071840;GO:0044710;GO:0071822;GO:0032981;GO:0010257;GO:0016043;GO:0065003;GO:0022900;GO:0022904;GO:0033108;GO:0009987;GO:0006461;GO:0008150;GO:0008152;GO:0043623;GO:0055114;GO:0044699;GO:0097031;GO:0044763;GO:0044237;GO:0006120;GO:0044085;GO:0019866;GO:1990204;GO:0031224;GO:0005739;GO:0098800;GO:0043227;GO:0044446;GO:0005743;GO:…	K03879	ND2	hsa04723;hsa05012;hsa00190	Retrograde endocannabinoid signaling;Parkinson's disease;Oxidative phosphorylation	COG1009;COG1007	C:Energy production and conversion;	PF00361.17;PF06444.8	Proton_antipo_M;NADH_dehy_S2_C	Proton-conducting membrane transporter;NADH dehydrogenase subunit 2 C-terminus	ER	1	3	38.9	High
O94887	FERM, ARHGEF and pleckstrin domain-containing protein 2 OS=Homo sapiens OX=9606 GN=FARP2 PE=1 SV=3	1.6069	0.68428	0.04954	up	yes	1.537	0.9565	BP:regulation of response to stimulus;BP:cell maturation;BP:signal transduction;BP:cell surface receptor signaling pathway;BP:cellular component organization or biogenesis;BP:macromolecular complex assembly;BP:regulation of signal transduction;BP:cellular developmental process;BP:leukocyte activation involved in immune response;BP:positive regulation of molecular function;BP:regulation of small G…	GO:0048583;GO:0048469;GO:0007165;GO:0007166;GO:0071840;GO:0065003;GO:0009966;GO:0048869;GO:0002366;GO:0044093;GO:0051056;GO:0002275;GO:0051128;GO:0016192;GO:0071526;GO:0002376;GO:0002274;GO:0022607;GO:0035023;GO:0045321;GO:0035556;GO:0002283;GO:0043547;GO:0016601;GO:0042551;GO:0006887;GO:0016043;GO:0045055;GO:0065007;GO:0044699;GO:0065009;GO:0043085;GO:0050790;GO:0006811;GO:0006810;GO:0071800;GO:…	K06082	FARP2, FRG	hsa04015;hsa04520	Rap1 signaling pathway;Adherens junction	------	------	PF00621.17;PF00169.26;PF09380.7;PF09379.7;PF08736.8;PF00373.15	RhoGEF;PH;FERM_C;FERM_N;FA;FERM_M	RhoGEF domain;PH domain;FERM C-terminal PH-like domain;FERM N-terminal domain;FERM adjacent;FERM central domain	cytoplasmic	1	1	119.8	Medium
G3V556	ATP synthase subunit ATP5MPL, mitochondrial OS=Homo sapiens OX=9606 GN=ATP5MPL PE=1 SV=1	1.39382	0.479047	0.01284	up	yes	1.444	1.036	CC:intracellular organelle part;CC:organelle;CC:cellular_component;CC:cell part;CC:intracellular organelle;CC:mitochondrion;CC:intracellular membrane-bounded organelle;CC:nucleoplasm;CC:cytoplasmic part;CC:nuclear part;CC:intracellular part;CC:membrane-bounded organelle;CC:organelle part;MF:organic cyclic compound binding;MF:RNA binding;MF:nucleic acid binding;MF:molecular_function;MF:heterocycli…	GO:0044446;GO:0043226;GO:0005575;GO:0044464;GO:0043229;GO:0005739;GO:0043231;GO:0005654;GO:0044444;GO:0044428;GO:0044424;GO:0043227;GO:0044422;GO:0097159;GO:0003723;GO:0003676;GO:0003674;GO:1901363;GO:0005488	------	------	------	------	------	------	PF08039.8	Mit_proteolip	Mitochondrial proteolipid	cytoplasmic	1	7	11.3	Medium
P06703	Protein S100-A6 OS=Homo sapiens OX=9606 GN=S100A6 PE=1 SV=1	1.34215	0.424551	0.02705	up	yes	1.42	1.058	BP:positive regulation of apoptotic signaling pathway;BP:positive regulation of nucleic acid-templated transcription;BP:positive regulation of nitrogen compound metabolic process;BP:establishment of localization;BP:regulation of primary metabolic process;BP:antimicrobial humoral response;BP:regulation of apoptotic signaling pathway;BP:regulation of RNA biosynthetic process;BP:positive regulation …	GO:2001235;GO:1903508;GO:0051173;GO:0051234;GO:0080090;GO:0019730;GO:2001233;GO:2001141;GO:0048584;GO:0048583;GO:0031349;GO:0007165;GO:0060326;GO:0032940;GO:0032989;GO:0050729;GO:0043207;GO:0009966;GO:0009967;GO:0071840;GO:0051493;GO:0050727;GO:0018193;GO:0033043;GO:0044093;GO:0048146;GO:0048518;GO:0002682;GO:0016192;GO:0051345;GO:0042127;GO:1902680;GO:0030595;GO:0030593;GO:0006935;GO:0060255;GO:…	------	------	------	------	------	------	PF01023.16;PF13499.3	S_100;EF-hand_7	S-100/ICaBP type calcium binding domain;EF-hand domain pair	cytoplasmic	8	66	10.2	High
K7EMV4	Transcription elongation factor 1 homolog OS=Homo sapiens OX=9606 GN=ELOF1 PE=1 SV=1	1.45148	0.53753	0.006555	up	yes	1.466	1.01	BP:regulation of primary metabolic process;BP:regulation of metabolic process;BP:signal transduction;BP:cell surface receptor signaling pathway;BP:organic cyclic compound biosynthetic process;BP:organic cyclic compound metabolic process;BP:regulation of macromolecule metabolic process;BP:regulation of RNA biosynthetic process;BP:heterocycle metabolic process;BP:aromatic compound biosynthetic proc…	GO:0080090;GO:0019222;GO:0007165;GO:0007166;GO:1901362;GO:1901360;GO:0060255;GO:2001141;GO:0046483;GO:0019438;GO:0006807;GO:0050789;GO:0097659;GO:1901576;GO:0044260;GO:0065007;GO:0007186;GO:0018130;GO:0009889;GO:0050794;GO:0008150;GO:0008152;GO:0034654;GO:0016070;GO:0044271;GO:0006355;GO:0010556;GO:0006351;GO:0032774;GO:0044249;GO:0034641;GO:0034645;GO:0006139;GO:0006725;GO:1903506;GO:0051252;GO:…	------	------	------	------	COG4888	R:General function prediction only	PF05129.10	Elf1	Transcription elongation factor Elf1 like	cytoplasmic	1	15	13.3	High
O75340	Programmed cell death protein 6 OS=Homo sapiens OX=9606 GN=PDCD6 PE=1 SV=1	1.38878	0.47382	0.01107	up	yes	1.436	1.034	BP:protein localization;BP:regulation of metabolic process;BP:cellular response to heat;BP:vesicle coating;BP:negative regulation of protein kinase B signaling;BP:signal transduction;BP:cell surface receptor signaling pathway;BP:enzyme linked receptor protein signaling pathway;BP:transmembrane receptor protein tyrosine kinase signaling pathway;BP:cellular component morphogenesis;BP:regulation of …	GO:0008104;GO:0019222;GO:0034605;GO:0006901;GO:0051898;GO:0007165;GO:0007166;GO:0007167;GO:0007169;GO:0032989;GO:0051896;GO:0071840;GO:0080090;GO:0014032;GO:0051716;GO:0014031;GO:0048864;GO:0010604;GO:0009968;GO:0009966;GO:0048869;GO:0044093;GO:0048518;GO:0048519;GO:0048585;GO:0042127;GO:0010634;GO:0060255;GO:0048583;GO:0045184;GO:0042221;GO:0030162;GO:0010038;GO:0010035;GO:0016192;GO:0010632;GO:…	------	------	------	------	------	------	PF00036.29;PF13499.3;PF13405.3;PF13833.3;PF13202.3	EF-hand_1;EF-hand_7;EF-hand_6;EF-hand_8;EF-hand_5	EF hand;EF-hand domain pair;EF-hand domain;EF-hand domain pair;EF hand	cytoplasmic	7	50	21.9	High
P84098	60S ribosomal protein L19 OS=Homo sapiens OX=9606 GN=RPL19 PE=1 SV=1	1.41487	0.500672	0.002643	up	yes	1.446	1.022	BP:protein localization;BP:membrane organization;BP:signal transduction;BP:cell chemotaxis;BP:positive regulation of establishment of protein localization to plasma membrane;BP:organic cyclic compound biosynthetic process;BP:cellular component organization or biogenesis;BP:organic cyclic compound catabolic process;BP:taxis;BP:cellular macromolecule localization;BP:peptide biosynthetic process;BP:…	GO:0008104;GO:0061024;GO:0007165;GO:0060326;GO:0090004;GO:1901362;GO:0071840;GO:1901361;GO:0042330;GO:0070727;GO:0043043;GO:0048513;GO:0044093;GO:0048518;GO:0033036;GO:0006364;GO:0034470;GO:0006935;GO:0031100;GO:0007264;GO:0006605;GO:0045184;GO:0072657;GO:0050794;GO:0046483;GO:1903827;GO:1901564;GO:1901566;GO:0048870;GO:0019538;GO:0019438;GO:0006613;GO:0019083;GO:0006614;GO:0006928;GO:0006807;GO:…	K02885	RP-L19e, RPL19	hsa03010	Ribosome	COG2147	J:Translation, ribosomal structure and biogenesis	PF01280.17	Ribosomal_L19e	Ribosomal protein L19e	cytoplasmic	9	38	23.5	High
P22352	Glutathione peroxidase 3 OS=Homo sapiens OX=9606 GN=GPX3 PE=1 SV=2	1.62813	0.703216	0.01111	up	yes	1.528	0.9385	BP:cellular component assembly;BP:protein homotetramerization;BP:macromolecular complex subunit organization;BP:response to reactive oxygen species;BP:cellular catabolic process;BP:hydrogen peroxide catabolic process;BP:cellular component organization;BP:cellular response to chemical stimulus;BP:detoxification;BP:cellular component organization or biogenesis;BP:single-organism catabolic process;B…	GO:0022607;GO:0051289;GO:0043933;GO:0000302;GO:0044248;GO:0042744;GO:0016043;GO:0070887;GO:0098754;GO:0071840;GO:0044712;GO:0098869;GO:0044710;GO:0071822;GO:0006982;GO:0051260;GO:0051262;GO:0010033;GO:0065003;GO:0044699;GO:0033554;GO:1901700;GO:0009987;GO:0006461;GO:0051716;GO:0072593;GO:0006950;GO:0008150;GO:0008152;GO:0042221;GO:0034599;GO:0009056;GO:0006979;GO:0055114;GO:0051259;GO:0050896;GO:…	K00432	gpx	hsa00590;hsa00480;hsa04918	Arachidonic acid metabolism;Glutathione metabolism;Thyroid hormone synthesis	COG0386	O:Posttranslational modification, protein turnover, chaperones	PF00255.16	GSHPx	Glutathione peroxidase	lysosomal	1	5	25.5	High
P46781	40S ribosomal protein S9 OS=Homo sapiens OX=9606 GN=RPS9 PE=1 SV=3	1.39046	0.47556	0.005957	up	yes	1.428	1.027	BP:protein localization;BP:regulation of primary metabolic process;BP:regulation of metabolic process;BP:positive regulation of translational fidelity;BP:membrane organization;BP:organic cyclic compound metabolic process;BP:organic cyclic compound catabolic process;BP:positive regulation of macromolecule metabolic process;BP:cellular macromolecule localization;BP:posttranscriptional regulation of…	GO:0008104;GO:0080090;GO:0019222;GO:0045903;GO:0061024;GO:1901360;GO:1901361;GO:0010604;GO:0070727;GO:0010608;GO:0043043;GO:0006388;GO:0048518;GO:0033036;GO:0006364;GO:0042127;GO:0006448;GO:0060255;GO:0006605;GO:0045184;GO:0090501;GO:0072657;GO:1901564;GO:0046483;GO:0000394;GO:0065008;GO:0019538;GO:0006450;GO:0009893;GO:0009891;GO:0006613;GO:0006612;GO:0006614;GO:0006807;GO:0034660;GO:0050789;GO:…	K02997	RP-S9e, RPS9	hsa03010	Ribosome	COG0522	J:Translation, ribosomal structure and biogenesis	PF01479.22;PF00163.16	S4;Ribosomal_S4	S4 domain;Ribosomal protein S4/S9 N-terminal domain	mitochondrial	11	37	22.6	High
A0A2R8Y3M9	Uncharacterized protein OS=Homo sapiens OX=9606 PE=4 SV=1	1.38012	0.464791	0.04079	up	yes	1.416	1.026	BP:regulation of complement activation;BP:regulation of primary metabolic process;BP:regulation of metabolic process;BP:regulation of response to external stimulus;BP:response to stimulus;BP:positive regulation of response to stimulus;BP:regulation of response to stimulus;BP:regulation of humoral immune response;BP:humoral immune response;BP:regulation of biological process;BP:regulation of defen…	GO:0030449;GO:0080090;GO:0019222;GO:0032101;GO:0050896;GO:0048584;GO:0048583;GO:0002920;GO:0006959;GO:0050789;GO:0031347;GO:0002376;GO:0044710;GO:0051234;GO:0072376;GO:0051246;GO:0050727;GO:0071704;GO:0002684;GO:0065007;GO:0044699;GO:0048518;GO:0002682;GO:1903034;GO:0010468;GO:0006956;GO:0002253;GO:0060255;GO:0045087;GO:0006810;GO:2000257;GO:0006952;GO:0006950;GO:0050776;GO:0008150;GO:0008152;GO:…	K01333;K01047	PLA2G, SPLA2;CFI	hsa04972;hsa04975;hsa04610;hsa00565;hsa00564;hsa00592;hsa00590;hsa00591;hsa04014;hsa05150;hsa04270	Pancreatic secretion;Fat digestion and absorption;Complement and coagulation cascades;Ether lipid metabolism;Glycerophospholipid metabolism;alpha-Linolenic acid metabolism;Arachidonic acid metabolism;Linoleic acid metabolism;Ras signaling pathway;Staphylococcus aureus infection;Vascular smooth muscle contraction	COG5640	O:Posttranslational modification, protein turnover, chaperones	PF06951.8;PF00089.23;PF00057.15;PF00530.15	PLA2G12;Trypsin;Ldl_recept_a;SRCR	Group XII secretory phospholipase A2 precursor;Trypsin;Low-density lipoprotein receptor domain class A;Scavenger receptor cysteine-rich domain	extracellular	1	2	71.3	High
Q04760	Lactoylglutathione lyase OS=Homo sapiens OX=9606 GN=GLO1 PE=1 SV=4	1.39842	0.4838	0.01219	up	yes	1.418	1.014	BP:regulation of primary metabolic process;BP:regulation of homotypic cell-cell adhesion;BP:regulation of T cell apoptotic process;BP:negative regulation of T cell apoptotic process;BP:positive regulation of alpha-beta T cell activation;BP:positive regulation of response to stimulus;BP:regulation of response to stimulus;BP:positive regulation of homeostatic process;BP:regulation of homeostatic pr…	GO:0080090;GO:0034110;GO:0070232;GO:0070233;GO:0046635;GO:0048584;GO:0048583;GO:0032846;GO:0032844;GO:0042035;GO:0007165;GO:0007166;GO:0060326;GO:0034112;GO:0051972;GO:0044710;GO:0042330;GO:0071704;GO:0009966;GO:0048869;GO:0070665;GO:0001775;GO:0002573;GO:0018193;GO:0046627;GO:0044093;GO:0048518;GO:0048519;GO:0048585;GO:0010543;GO:0070229;GO:0070228;GO:0051054;GO:0006935;GO:0032101;GO:0060255;GO:…	K01759	GLO1, gloA	hsa00620	Pyruvate metabolism	------	------	PF00903.22;PF13669.3	Glyoxalase;Glyoxalase_4	Glyoxalase/Bleomycin resistance protein/Dioxygenase superfamily;Glyoxalase/Bleomycin resistance protein/Dioxygenase superfamily	cytoplasmic	7	47	20.8	High
P08962	CD63 antigen OS=Homo sapiens OX=9606 GN=CD63 PE=1 SV=2	1.34686	0.4296	0.03716	up	yes	1.394	1.035	BP:protein localization;BP:regulation of metabolic process;BP:regulation of transport;BP:positive regulation of response to stimulus;BP:cell-matrix adhesion;BP:regulation of signal transduction;BP:regulation of ion transmembrane transport;BP:positive regulation of receptor-mediated endocytosis;BP:regulation of transmembrane transport;BP:cellular response to stimulus;BP:positive regulation of cell…	GO:0008104;GO:0019222;GO:0051049;GO:0048584;GO:0007160;GO:0009966;GO:0034765;GO:0048260;GO:0034762;GO:0051716;GO:0045785;GO:0048869;GO:0044419;GO:0030855;GO:0048518;GO:0065007;GO:0033036;GO:0031589;GO:0051050;GO:0060255;GO:0048583;GO:0050931;GO:0045184;GO:1901379;GO:0051704;GO:0016197;GO:0009605;GO:0048870;GO:0002275;GO:0002376;GO:0009877;GO:0002274;GO:0009893;GO:1902547;GO:1904062;GO:0006928;GO:…	K06497	CD63, MLA1, TSPAN30	hsa05205;hsa04142	Proteoglycans in cancer;Lysosome	------	------	PF00335.17	Tetraspannin	Tetraspanin family	extracellular	5	19	25.6	High
P00395	Cytochrome c oxidase subunit 1 OS=Homo sapiens OX=9606 GN=MT-CO1 PE=1 SV=1	1.60989	0.68696	0.0377	up	yes	1.498	0.9305	BP:copper ion homeostasis;BP:small molecule metabolic process;BP:transition metal ion homeostasis;BP:inorganic ion homeostasis;BP:organic cyclic compound metabolic process;BP:single-organism metabolic process;BP:purine ribonucleoside metabolic process;BP:organic substance metabolic process;BP:ribonucleoside triphosphate metabolic process;BP:electron transport chain;BP:respiratory electron transpo…	GO:0055070;GO:0044281;GO:0055076;GO:0098771;GO:1901360;GO:0044710;GO:0046128;GO:0071704;GO:0009199;GO:0022900;GO:0022904;GO:0009205;GO:0046034;GO:0019646;GO:0010038;GO:0010035;GO:0055114;GO:0046483;GO:1901564;GO:0009167;GO:0048878;GO:0006163;GO:0009141;GO:0009161;GO:0009144;GO:0009061;GO:0009060;GO:0015992;GO:0015990;GO:0065007;GO:0098662;GO:0098660;GO:0019637;GO:0065008;GO:0009150;GO:0006119;GO:…	K02256	COX1	hsa00190;hsa04260;hsa04932;hsa05016;hsa05010;hsa05012	Oxidative phosphorylation;Cardiac muscle contraction;Non-alcoholic fatty liver diseas;Huntington's disease;Alzheimer's disease;Parkinson's disease	COG0843	C:Energy production and conversion	PF00115.17	COX1	Cytochrome C and Quinol oxidase polypeptide I	cytoplasmic	1	6	57	High
O15260	Surfeit locus protein 4 OS=Homo sapiens OX=9606 GN=SURF4 PE=1 SV=3	1.39822	0.483593	0.04641	up	yes	1.415	1.012	BP:protein localization;BP:positive regulation of cell junction assembly;BP:behavior;BP:signal transduction;BP:single-multicellular organism process;BP:cellular component organization or biogenesis;BP:cellular developmental process;BP:spermatid differentiation;BP:positive regulation of biological process;BP:macromolecule localization;BP:vesicle-mediated transport;BP:regulation of cell junction as…	GO:0008104;GO:1901890;GO:0007610;GO:0007165;GO:0044707;GO:0071840;GO:0048869;GO:0048515;GO:0048518;GO:0033036;GO:0016192;GO:1901888;GO:0045184;GO:0003006;GO:0002275;GO:0003008;GO:0016197;GO:0044702;GO:0044708;GO:0002274;GO:0010638;GO:0045055;GO:0050789;GO:0007632;GO:0045321;GO:0097711;GO:0002283;GO:0007588;GO:0006886;GO:0006887;GO:0016043;GO:0002366;GO:0065007;GO:0051130;GO:0098602;GO:0098609;GO:…	K20369	ERV29, SURF4	------	------	COG2259	S:Function unknown	PF02077.12	SURF4	SURF4 family	cytoplasmic	5	21	30.4	High
P02649	Apolipoprotein E OS=Homo sapiens OX=9606 GN=APOE PE=1 SV=1	1.4343	0.52035	0.03568	up	yes	1.43	0.997	BP:regulation of membrane protein ectodomain proteolysis;BP:positive regulation of membrane protein ectodomain proteolysis;BP:regulation of transport;BP:small molecule metabolic process;BP:small molecule catabolic process;BP:small molecule biosynthetic process;BP:inorganic ion homeostasis;BP:regulation of inclusion body assembly;BP:negative regulation of phospholipid transport;BP:regulation of ph…	GO:0051043;GO:0051044;GO:0051049;GO:0044281;GO:0044282;GO:0044283;GO:0098771;GO:0090083;GO:2001139;GO:2001138;GO:0051651;GO:1903000;GO:0035640;GO:0051716;GO:0035641;GO:0016101;GO:0044794;GO:0031102;GO:0060548;GO:0045859;GO:0046486;GO:1903002;GO:2000644;GO:0042325;GO:0042326;GO:0010632;GO:0010633;GO:0019538;GO:0009896;GO:0009894;GO:0009892;GO:0009893;GO:0009890;GO:0009891;GO:0090261;GO:0000302;GO:…	K04524	APOE	hsa05010	Alzheimer's disease	------	------	PF01442.15	Apolipoprotein	Apolipoprotein A1/A4/E domain	extracellular	4	12	36.1	High
Q9BZX2	Uridine-cytidine kinase 2 OS=Homo sapiens OX=9606 GN=UCK2 PE=1 SV=1	1.40358	0.48911	0.00251	up	yes	1.412	1.006	BP:regulation of leukocyte cell-cell adhesion;BP:regulation of phosphate metabolic process;BP:regulation of primary metabolic process;BP:regulation of metabolic process;BP:positive regulation of secretion;BP:pyrimidine ribonucleotide metabolic process;BP:regulation of transport;BP:ribonucleoside monophosphate biosynthetic process;BP:regulation of alpha-beta T cell activation;BP:nucleotide biosynt…	GO:1903037;GO:0019220;GO:0080090;GO:0019222;GO:0051047;GO:0009218;GO:0051049;GO:0009156;GO:0046634;GO:0009165;GO:0002702;GO:0002700;GO:0046134;GO:1901362;GO:1901360;GO:0034112;GO:0044710;GO:0044711;GO:0051046;GO:0045785;GO:0002263;GO:0032729;GO:0048518;GO:0065007;GO:0042129;GO:0010138;GO:0046635;GO:0042127;GO:1902713;GO:0009201;GO:1902715;GO:0046035;GO:2000482;GO:2000484;GO:0009209;GO:0009208;GO:…	K00876	udk, UCK	hsa00983;hsa00240	Drug metabolism - other enzymes;Pyrimidine metabolism	COG0572	F:Nucleotide transport and metabolism	PF00485.15;PF01121.17	PRK;CoaE	Phosphoribulokinase / Uridine kinase family;Dephospho-CoA kinase	cytoplasmic	1	7	29.3	High
Q86WC4	Osteopetrosis-associated transmembrane protein 1 OS=Homo sapiens OX=9606 GN=OSTM1 PE=1 SV=1	1.36542	0.449347	0.003053	up	yes	1.39	1.018	BP:cell differentiation;BP:localization;BP:single-organism process;BP:cellular developmental process;BP:myeloid leukocyte differentiation;BP:leukocyte differentiation;BP:developmental process;BP:transport;BP:ion transport;BP:osteoclast differentiation;BP:single-organism developmental process;BP:ion transmembrane transport;BP:single-organism transport;BP:single-organism cellular process;BP:establi…	GO:0030154;GO:0051179;GO:0044699;GO:0048869;GO:0002573;GO:0002521;GO:0032502;GO:0006810;GO:0006811;GO:0030316;GO:0044767;GO:0034220;GO:0044765;GO:0044763;GO:0051234;GO:0055085;GO:1902578;GO:0030099;GO:0008150;GO:0009987;GO:0016021;GO:0000323;GO:0043229;GO:0005774;GO:0043227;GO:0043226;GO:0005764;GO:0031090;GO:0005773;GO:0098805;GO:0016020;GO:0044437;GO:0098588;GO:0044446;GO:0044425;GO:0043231;GO:…	------	------	------	------	------	------	PF09777.6	OSTMP1	Osteopetrosis-associated transmembrane protein 1 precursor	extracellular	2	6	37.2	High
Q9HDC9	Adipocyte plasma membrane-associated protein OS=Homo sapiens OX=9606 GN=APMAP PE=1 SV=2	1.402	0.487486	0.01263	up	yes	1.402	1	BP:regulation of transport;BP:regulation of intracellular transport;BP:regulation of response to stimulus;BP:regulation of calcium-mediated signaling;BP:calcium ion homeostasis;BP:inorganic ion homeostasis;BP:regulation of ion transmembrane transport;BP:regulation of transmembrane transport;BP:muscle organ development;BP:regulation of signal transduction;BP:animal organ development;BP:regulation …	GO:0051049;GO:0032386;GO:0048583;GO:0050848;GO:0055074;GO:0098771;GO:0034765;GO:0034762;GO:0007517;GO:0009966;GO:0048513;GO:0010522;GO:0019725;GO:0051282;GO:0060314;GO:0070838;GO:0032844;GO:0090279;GO:0007204;GO:0048878;GO:0032412;GO:1904062;GO:0050789;GO:0065007;GO:0065009;GO:0065008;GO:1903649;GO:0006812;GO:0006811;GO:0006810;GO:0006816;GO:0050794;GO:0008150;GO:0008152;GO:1902531;GO:0010959;GO:…	------	------	------	------	COG3386	G:Carbohydrate transport and metabolism	PF03088.13;PF08450.9	Str_synth;SGL	Strictosidine synthase;SMP-30/Gluconolaconase/LRE-like region	cytoplasmic	15	45	46.5	High
Q15257	Serine/threonine-protein phosphatase 2A activator OS=Homo sapiens OX=9606 GN=PTPA PE=1 SV=3	1.27757	0.353398	0.03095	up	yes	1.344	1.052	BP:regulation of microtubule polymerization or depolymerization;BP:negative regulation of microtubule polymerization or depolymerization;BP:regulation of phosphate metabolic process;BP:regulation of primary metabolic process;BP:regulation of metabolic process;BP:protein dephosphorylation;BP:negative regulation of response to stimulus;BP:regulation of response to stimulus;BP:regulation of protein …	GO:0031110;GO:0031111;GO:0019220;GO:0080090;GO:0019222;GO:0006470;GO:0048585;GO:0048583;GO:0034047;GO:0007165;GO:0007166;GO:0007167;GO:0007169;GO:0010605;GO:0010604;GO:0009968;GO:0051494;GO:0051493;GO:0018193;GO:0044093;GO:0044092;GO:0048518;GO:0048519;GO:0042325;GO:0060255;GO:0007051;GO:1901880;GO:0051129;GO:0042326;GO:0018208;GO:0044707;GO:0010633;GO:0019538;GO:0022402;GO:0031114;GO:0070507;GO:…	K17605	PPP2R4, PTPA	hsa04931	Insulin resistance	COG5057	T:Signal transduction mechanisms	PF03095.12	PTPA	Phosphotyrosyl phosphate activator	cytoplasmic	3	15	40.6	High
F8WCF6	Actin-related protein 2/3 complex subunit 4 OS=Homo sapiens OX=9606 GN=ARPC4-TTLL3 PE=3 SV=1	1.28804	0.365175	0.02164	up	yes	1.346	1.045	BP:positive regulation of response to stimulus;BP:regulation of response to stimulus;BP:regulation of actin polymerization or depolymerization;BP:signal transduction;BP:cell surface receptor signaling pathway;BP:enzyme linked receptor protein signaling pathway;BP:transmembrane receptor protein tyrosine kinase signaling pathway;BP:cellular component organization or biogenesis;BP:positive regulatio…	GO:0048584;GO:0048583;GO:0008064;GO:0007165;GO:0007166;GO:0007167;GO:0007169;GO:0071840;GO:0051495;GO:0051493;GO:0048518;GO:0002682;GO:0030041;GO:0002429;GO:0010638;GO:0002376;GO:0022607;GO:0050789;GO:0002764;GO:0002431;GO:0002768;GO:0002433;GO:0016043;GO:0090066;GO:0065003;GO:0002684;GO:0065007;GO:0065008;GO:0051130;GO:0050794;GO:0008154;GO:0008150;GO:0032956;GO:0043254;GO:0038096;GO:0002757;GO:…	K05755	ARPC4	hsa05132;hsa05131;hsa05130;hsa05100;hsa04144;hsa04666;hsa04810	Salmonella infection;Shigellosis;Pathogenic Escherichia coli infection;Bacterial invasion of epithelial cells;Endocytosis;Fc gamma R-mediated phagocytosis;Regulation of actin cytoskeleton	------	------	PF05856.9	ARPC4	ARP2/3 complex 20 kDa subunit	cytoplasmic	8	52	21	High
P56381	ATP synthase subunit epsilon, mitochondrial OS=Homo sapiens OX=9606 GN=ATP5F1E PE=1 SV=2	1.4596	0.545572	0.01508	up	yes	1.418	0.9715	BP:purine ribonucleoside monophosphate metabolic process;BP:nucleotide biosynthetic process;BP:small molecule metabolic process;BP:ribonucleoside monophosphate metabolic process;BP:organic cyclic compound biosynthetic process;BP:purine nucleoside biosynthetic process;BP:purine ribonucleoside monophosphate biosynthetic process;BP:mitochondrion organization;BP:single-organism metabolic process;BP:s…	GO:0009167;GO:0009165;GO:0044281;GO:0009161;GO:1901362;GO:0042451;GO:0009168;GO:0007005;GO:0044710;GO:0044711;GO:0071840;GO:1990542;GO:0009199;GO:0098662;GO:0009206;GO:0009205;GO:0009201;GO:0046034;GO:0098660;GO:0007006;GO:0006839;GO:0046129;GO:0046128;GO:0042455;GO:0046483;GO:1901564;GO:1901566;GO:0061024;GO:0006163;GO:0006164;GO:0019637;GO:0019438;GO:0009163;GO:0009141;GO:0009142;GO:0009144;GO:…	K02135	ATPeF1E, ATP5E, ATP15	hsa05016;hsa05010;hsa05012;hsa00190	Huntington's disease;Alzheimer's disease;Parkinson's disease;Oxidative phosphorylation	------	------	PF04627.10	ATP-synt_Eps	Mitochondrial ATP synthase epsilon chain	mitochondrial	2	29	5.8	High
O75394	39S ribosomal protein L33, mitochondrial OS=Homo sapiens OX=9606 GN=MRPL33 PE=1 SV=1	1.4173	0.503144	0.004716	up	yes	1.401	0.9885	BP:primary metabolic process;BP:macromolecular complex subunit organization;BP:cellular amide metabolic process;BP:cellular biosynthetic process;BP:cellular macromolecule biosynthetic process;BP:protein complex disassembly;BP:single-organism process;BP:organic substance biosynthetic process;BP:macromolecular complex disassembly;BP:cellular macromolecule metabolic process;BP:peptide biosynthetic p…	GO:0044238;GO:0043933;GO:0043603;GO:0044249;GO:0034645;GO:0043241;GO:0044699;GO:1901576;GO:0032984;GO:0044260;GO:0043043;GO:0016043;GO:0071704;GO:0071840;GO:0070126;GO:0070125;GO:0044267;GO:0044271;GO:0009987;GO:0009058;GO:0009059;GO:0008150;GO:0008152;GO:1901564;GO:0043624;GO:0006518;GO:0043604;GO:0071822;GO:1901566;GO:0019538;GO:0044763;GO:0034641;GO:0044237;GO:0043170;GO:0006807;GO:0022411;GO:…	K02913	RP-L33, MRPL33, rpmG	hsa03010	Ribosome	COG0267	J:Translation, ribosomal structure and biogenesis	PF00471.17	Ribosomal_L33	Ribosomal protein L33	mitochondrial	1	17	7.6	High
P17931	Galectin-3 OS=Homo sapiens OX=9606 GN=LGALS3 PE=1 SV=5	1.30821	0.387597	0.04576	up	yes	1.354	1.035	BP:negative regulation of apoptotic signaling pathway;BP:negative regulation of immunological synapse formation;BP:regulation of immunological synapse formation;BP:negative regulation of homotypic cell-cell adhesion;BP:regulation of apoptotic signaling pathway;BP:regulation of T cell apoptotic process;BP:regulation of transport;BP:negative regulation of response to stimulus;BP:regulation of respo…	GO:2001234;GO:2000521;GO:2000520;GO:0034111;GO:2001233;GO:0070232;GO:0051049;GO:0048585;GO:0048583;GO:2001236;GO:0007162;GO:2001237;GO:0060326;GO:0034764;GO:0034765;GO:0034767;GO:1901360;GO:0009968;GO:0009966;GO:0048869;GO:0070663;GO:0002685;GO:0030855;GO:0048518;GO:0048519;GO:0001906;GO:0051704;GO:0016192;GO:0042127;GO:0070228;GO:0030595;GO:0030593;GO:0006935;GO:0051051;GO:0051050;GO:0060548;GO:…	K06831	LGALS3	------	------	------	------	PF00337.19	Gal-bind_lectin	Galactoside-binding lectin	cytoplasmic	7	31	26.1	High
M0R2A0	ER membrane protein complex subunit 10 OS=Homo sapiens OX=9606 GN=EMC10 PE=1 SV=1	1.31845	0.398839	0.02428	up	yes	1.358	1.03	CC:protein complex;CC:intracellular organelle part;CC:macromolecular complex;CC:membrane protein complex;CC:cell part;CC:ER membrane protein complex;CC:cellular_component;CC:endoplasmic reticulum part;CC:cytoplasmic part;CC:extracellular region;CC:intracellular part;CC:membrane part;CC:organelle part;	GO:0043234;GO:0044446;GO:0032991;GO:0098796;GO:0044464;GO:0072546;GO:0005575;GO:0044432;GO:0044444;GO:0005576;GO:0044424;GO:0044425;GO:0044422	------	------	------	------	------	------	------	------	------	extracellular	2	11	39	High
H7C2K6	Band 4.1-like protein 1 (Fragment) OS=Homo sapiens OX=9606 GN=EPB41L1 PE=1 SV=1	1.30435	0.383329	0.01499	up	yes	1.35	1.035	BP:actin cytoskeleton organization;BP:single-organism organelle organization;BP:cellular component organization;BP:cellular component organization or biogenesis;BP:actin filament-based process;BP:cellular process;BP:biological_process;BP:organelle organization;BP:single-organism process;BP:cytoskeleton organization;BP:cortical actin cytoskeleton organization;BP:cortical cytoskeleton organization;…	GO:0030036;GO:1902589;GO:0016043;GO:0071840;GO:0030029;GO:0009987;GO:0008150;GO:0006996;GO:0044699;GO:0007010;GO:0030866;GO:0030865;GO:0044763;GO:0019898;GO:0043229;GO:0031229;GO:0031301;GO:0031300;GO:0034993;GO:0043226;GO:0031224;GO:0005856;GO:0044446;GO:0005639;GO:0016021;GO:0016020;GO:0044453;GO:0043234;GO:0005886;GO:0032991;GO:0043232;GO:0005829;GO:0044464;GO:0005575;GO:0044444;GO:0043228;GO:…	K06107	EPB41, 4.1R	------	------	------	------	PF04382.10;PF05902.10	SAB;4_1_CTD	SAB domain;4.1 protein C-terminal domain	cytoplasmic	1	44	29.1	High
Q96BR5	Cytochrome c oxidase assembly factor 7 OS=Homo sapiens OX=9606 GN=COA7 PE=1 SV=2	1.40666	0.492274	0.03059	up	yes	1.394	0.991	BP:regulation of primary metabolic process;BP:regulation of metabolic process;BP:regulation of transport;BP:signal transduction;BP:organic substance metabolic process;BP:peptidyl-amino acid modification;BP:positive regulation of molecular function;BP:positive regulation of biological process;BP:regulation of cell proliferation;BP:positive regulation of transport;BP:regulation of macromolecule met…	GO:0080090;GO:0019222;GO:0051049;GO:0007165;GO:0071704;GO:0018193;GO:0044093;GO:0048518;GO:0042127;GO:0051050;GO:0060255;GO:2001141;GO:0018209;GO:0019538;GO:0032411;GO:0035556;GO:0050789;GO:0044267;GO:0044260;GO:0065007;GO:0065009;GO:0006810;GO:0006811;GO:0009889;GO:0050794;GO:0043412;GO:0036211;GO:0008150;GO:0008152;GO:0051234;GO:0050896;GO:0006950;GO:0006355;GO:0010556;GO:0016310;GO:0051128;GO:…	K18180	COA7, SELRC1, RESA1	------	------	COG0790	R:General function prediction only	PF08238.9	Sel1	Sel1 repeat	cytoplasmic	4	28	25.7	High
Q96HV5	Transmembrane protein 41A OS=Homo sapiens OX=9606 GN=TMEM41A PE=1 SV=1	1.53004	0.613567	0.02461	up	yes	1.439	0.9405	BP:signal transduction;BP:regulation of biological process;BP:biological regulation;BP:regulation of cellular process;BP:biological_process;CC:intrinsic component of membrane;CC:integral component of membrane;CC:membrane;CC:plasma membrane;CC:cell part;CC:cellular_component;CC:membrane part;MF:purine ribonucleoside triphosphate binding;MF:molecular_function;MF:nucleotide binding;MF:nucleoside bin…	GO:0007165;GO:0050789;GO:0065007;GO:0050794;GO:0008150;GO:0031224;GO:0016021;GO:0016020;GO:0005886;GO:0044464;GO:0005575;GO:0044425;GO:0035639;GO:0003674;GO:0000166;GO:0001882;GO:0043168;GO:0019001;GO:1901363;GO:0032561;GO:0001883;GO:0032549;GO:0017076;GO:0005525;GO:0016787;GO:0003924;GO:0017111;GO:1901265;GO:0036094;GO:0003824;GO:0016818;GO:0043167;GO:0097367;GO:0097159;GO:0016817;GO:0016462;GO:…	------	------	------	------	COG0398	S:Function unknown	PF09335.8	SNARE_assoc	SNARE associated Golgi protein	extracellular	1	5	29.6	Medium
A0A0G2JH50	HLA class I histocompatibility antigen, C alpha chain OS=Homo sapiens OX=9606 GN=HLA-C PE=1 SV=1	1.41176	0.4975	0.007493	up	yes	1.392	0.986	BP:cytokine-mediated signaling pathway;BP:immune system process;BP:signal transduction;BP:regulation of biological process;BP:antigen processing and presentation of exogenous peptide antigen via MHC class I;BP:cell surface receptor signaling pathway;BP:interspecies interaction between organisms;BP:antigen processing and presentation of peptide antigen;BP:antigen processing and presentation of pep…	GO:0019221;GO:0002376;GO:0007165;GO:0050789;GO:0042590;GO:0007166;GO:0044419;GO:0048002;GO:0002474;GO:0002682;GO:0002479;GO:0002478;GO:0065007;GO:0019882;GO:0019884;GO:0009987;GO:0048583;GO:0050794;GO:0060333;GO:0008150;GO:0060337;GO:0006955;GO:0016032;GO:0044403;GO:0051704;GO:0002504;GO:0050776;GO:0002480;GO:0050896;GO:0044764;GO:0012507;GO:0030176;GO:0031227;GO:0031224;GO:0010008;GO:0031090;GO:…	------	------	------	------	------	------	PF00129.15;PF07654.12;PF06623.8	MHC_I;C1-set;MHC_I_C	Class I Histocompatibility antigen, domains alpha 1 and 2;Immunoglobulin C1-set domain;MHC_I C-terminus	plasma membrane	2	38	41.5	High
P61313	60S ribosomal protein L15 OS=Homo sapiens OX=9606 GN=RPL15 PE=1 SV=2	1.29651	0.374635	0.01754	up	yes	1.338	1.032	BP:protein localization;BP:regulation of metabolic process;BP:behavior;BP:membrane organization;BP:signal transduction;BP:organic cyclic compound biosynthetic process;BP:organic cyclic compound metabolic process;BP:organic cyclic compound catabolic process;BP:positive regulation of macromolecule metabolic process;BP:cellular macromolecule localization;BP:peptide biosynthetic process;BP:positive r…	GO:0008104;GO:0019222;GO:0007610;GO:0061024;GO:0007165;GO:1901362;GO:1901360;GO:1901361;GO:0010604;GO:0070727;GO:0043043;GO:0048518;GO:0033036;GO:0006364;GO:0034470;GO:0060255;GO:0006605;GO:0045184;GO:0072657;GO:1901564;GO:0010033;GO:0050794;GO:0046483;GO:1901566;GO:0019538;GO:0019438;GO:0007631;GO:0044707;GO:0009893;GO:0022603;GO:0006613;GO:0019083;GO:0006614;GO:0006807;GO:0034660;GO:0050789;GO:…	K02877	RP-L15e, RPL15	hsa03010	Ribosome	COG1632	J:Translation, ribosomal structure and biogenesis	PF00827.14	Ribosomal_L15e	Ribosomal L15	cytoplasmic	11	46	24.1	High
P04406	Glyceraldehyde-3-phosphate dehydrogenase OS=Homo sapiens OX=9606 GN=GAPDH PE=1 SV=3	1.28876	0.365983	0.01396	up	yes	1.33	1.032	BP:regulation of protein localization;BP:regulation of cytokine secretion;BP:regulation of primary metabolic process;BP:regulation of metabolic process;BP:positive regulation of secretion;BP:regulation of response to stimulus;BP:negative regulation of cellular macromolecule biosynthetic process;BP:purine ribonucleoside monophosphate metabolic process;BP:canonical glycolysis;BP:glycolytic process …	GO:0032880;GO:0050707;GO:0080090;GO:0019222;GO:0051047;GO:0048583;GO:2000113;GO:0009167;GO:0061621;GO:0061620;GO:0044281;GO:0044282;GO:0009161;GO:0031341;GO:0031343;GO:1901360;GO:0044712;GO:0043065;GO:0044710;GO:0044711;GO:0010605;GO:0043207;GO:0051707;GO:0018193;GO:0044419;GO:0009199;GO:0051817;GO:0016310;GO:0048518;GO:0048519;GO:0001906;GO:0051704;GO:0009205;GO:0051050;GO:0060255;GO:0046034;GO:…	K00134	GAPDH, gapA	hsa01230;hsa01200;hsa04066;hsa00010;hsa05010	Biosynthesis of amino acids;Carbon metabolism;HIF-1 signaling pathway;Glycolysis / Gluconeogenesis;Alzheimer's disease	COG0057	G:Carbohydrate transport and metabolism	PF02800.17;PF00044.21	Gp_dh_C;Gp_dh_N	Glyceraldehyde 3-phosphate dehydrogenase, C-terminal domain;Glyceraldehyde 3-phosphate dehydrogenase, NAD binding domain	cytoplasmic	26	87	36	High
Q9Y2R0	Cytochrome c oxidase assembly factor 3 homolog, mitochondrial OS=Homo sapiens OX=9606 GN=COA3 PE=1 SV=1	1.38586	0.47078	0.01635	up	yes	1.372	0.99	BP:positive regulation of mitochondrial translation;BP:regulation of primary metabolic process;BP:regulation of metabolic process;BP:cellular component organization or biogenesis;BP:positive regulation of macromolecule metabolic process;BP:posttranscriptional regulation of gene expression;BP:regulation of organelle organization;BP:positive regulation of biological process;BP:mitochondrial respira…	GO:0070131;GO:0080090;GO:0019222;GO:0071840;GO:0010604;GO:0010608;GO:0033043;GO:0048518;GO:0097034;GO:0060255;GO:0010638;GO:0022607;GO:0009893;GO:0009891;GO:0017004;GO:0010628;GO:0043170;GO:0050789;GO:1901576;GO:0044260;GO:0016043;GO:0065003;GO:0065007;GO:0044699;GO:0045727;GO:0051130;GO:0009889;GO:0050794;GO:0008150;GO:0008152;GO:0010556;GO:0022411;GO:0034250;GO:0033617;GO:0070271;GO:0051128;GO:…	K18175	CCDC56, COA3	------	------	------	------	PF09813.6	Coiled-coil_56	Coiled-coil domain-containing protein 56	cytoplasmic	3	27	11.7	High
P05386	60S acidic ribosomal protein P1 OS=Homo sapiens OX=9606 GN=RPLP1 PE=1 SV=1	1.26174	0.33542	0.04966	up	yes	1.316	1.043	BP:protein localization;BP:regulation of phosphate metabolic process;BP:regulation of primary metabolic process;BP:regulation of metabolic process;BP:activation of protein kinase activity;BP:membrane organization;BP:organic cyclic compound biosynthetic process;BP:organic cyclic compound metabolic process;BP:organic cyclic compound catabolic process;BP:cellular macromolecule localization;BP:peptid…	GO:0008104;GO:0019220;GO:0080090;GO:0019222;GO:0032147;GO:0061024;GO:1901362;GO:1901360;GO:1901361;GO:0070727;GO:0043043;GO:0044093;GO:0048518;GO:0033036;GO:0006364;GO:0034470;GO:0060255;GO:0045859;GO:0006605;GO:0045184;GO:0072657;GO:1901564;GO:0050794;GO:0046483;GO:0042325;GO:0030261;GO:0042327;GO:1901566;GO:0019538;GO:0050789;GO:0019438;GO:0071103;GO:0009893;GO:0033674;GO:0006613;GO:0019083;GO:…	K02942	RP-LP1, RPLP1	hsa03010	Ribosome	COG2058	J:Translation, ribosomal structure and biogenesis	PF00428.16	Ribosomal_60s	60s Acidic ribosomal protein	cytoplasmic	3	72	11.5	High
P30041	Peroxiredoxin-6 OS=Homo sapiens OX=9606 GN=PRDX6 PE=1 SV=3	1.23714	0.307012	0.04468	up	yes	1.299	1.05	BP:protein localization;BP:regulation of phosphate metabolic process;BP:regulation of primary metabolic process;BP:regulation of metabolic process;BP:regulation of apoptotic signaling pathway;BP:positive regulation of mRNA processing;BP:regulation of mRNA processing;BP:positive regulation of response to stimulus;BP:regulation of response to stimulus;BP:activation of protein kinase activity;BP:cel…	GO:0008104;GO:0019220;GO:0080090;GO:0019222;GO:2001233;GO:0050685;GO:0050684;GO:0048584;GO:0048583;GO:0032147;GO:0044242;GO:0045055;GO:0045454;GO:0044712;GO:0044710;GO:0032879;GO:0010604;GO:0009966;GO:0009967;GO:0098869;GO:0051048;GO:0044093;GO:0051049;GO:0048518;GO:0065007;GO:0033036;GO:0046503;GO:0019725;GO:0051051;GO:0060255;GO:0045859;GO:0045184;GO:1990748;GO:0046486;GO:0055114;GO:0016192;GO:…	K11188	PRDX6	------	------	COG0450	O:Posttranslational modification, protein turnover, chaperones	PF00578.18;PF10417.6;PF08534.7	AhpC-TSA;1-cysPrx_C;Redoxin	AhpC/TSA family;C-terminal domain of 1-Cys peroxiredoxin;Redoxin	cytoplasmic	13	59	25	High
J3KPS0	DnaJ (Hsp40) homolog, subfamily B, member 12, isoform CRA_c OS=Homo sapiens OX=9606 GN=DNAJB12 PE=1 SV=1	1.29619	0.374275	0.03318	up	yes	1.326	1.023	CC:cellular_component;CC:membrane part;CC:integral component of membrane;CC:intrinsic component of membrane;	GO:0005575;GO:0044425;GO:0016021;GO:0031224	K09518	DNAJB12	hsa04141	Protein processing in endoplasmic reticulum	COG0484	O:Posttranslational modification, protein turnover, chaperones	PF09320.8;PF00226.28	DUF1977;DnaJ	Domain of unknown function;DnaJ domain	mitochondrial	2	12	45.5	High
P40616	ADP-ribosylation factor-like protein 1 OS=Homo sapiens OX=9606 GN=ARL1 PE=1 SV=1	1.29199	0.369597	0.006768	up	yes	1.323	1.024	BP:protein localization;BP:rRNA pseudouridine synthesis;BP:RNA modification;BP:signal transduction;BP:snoRNA guided rRNA pseudouridine synthesis;BP:organic cyclic compound metabolic process;BP:single-organism metabolic process;BP:cellular macromolecule localization;BP:cellular component organization or biogenesis;BP:positive regulation of molecular function;BP:positive regulation of biological pr…	GO:0008104;GO:0031118;GO:0009451;GO:0007165;GO:0000454;GO:1901360;GO:0044710;GO:0070727;GO:0071840;GO:0044093;GO:0048518;GO:0033036;GO:0016192;GO:0042127;GO:0034470;GO:0031584;GO:0040031;GO:0046483;GO:0016197;GO:0000154;GO:0034067;GO:0006807;GO:0034660;GO:0035556;GO:0043170;GO:0044260;GO:0016043;GO:0043144;GO:0065007;GO:0006364;GO:0065009;GO:0043085;GO:0034613;GO:0006810;GO:0050794;GO:0043412;GO:…	K07942	ARL1	------	------	COG1100	R:General function prediction only	PF00025.18;PF08477.10;PF00071.19;PF00503.17;PF09439.7;PF04670.9	Arf;Roc;Ras;G-alpha;SRPRB;Gtr1_RagA	ADP-ribosylation factor family;Ras of Complex, Roc, domain of DAPkinase;Ras family;G-protein alpha subunit;Signal recognition particle receptor beta subunit;Gtr1/RagA G protein conserved region	cytoplasmic	8	64	20.4	High
Q9NP61	ADP-ribosylation factor GTPase-activating protein 3 OS=Homo sapiens OX=9606 GN=ARFGAP3 PE=1 SV=1	1.2955	0.373508	0.00535	up	yes	1.324	1.022	BP:positive regulation of GTPase activity;BP:protein localization;BP:regulation of catalytic activity;BP:single-organism process;BP:central nervous system development;BP:positive regulation of hydrolase activity;BP:regulation of GTPase activity;BP:biological regulation;BP:organic substance transport;BP:regulation of molecular function;BP:macromolecule localization;BP:developmental process;BP:posi…	GO:0043547;GO:0008104;GO:0050790;GO:0044699;GO:0007417;GO:0051345;GO:0043087;GO:0065007;GO:0071702;GO:0065009;GO:0033036;GO:0032502;GO:0043085;GO:0009987;GO:0044093;GO:0048193;GO:0009306;GO:0006810;GO:0048731;GO:0045184;GO:0015031;GO:0044765;GO:0008150;GO:0051649;GO:0006888;GO:0051234;GO:0051179;GO:1902578;GO:0016192;GO:0051336;GO:0046903;GO:0006890;GO:0046907;GO:0048856;GO:0032940;GO:0044763;GO:…	K12493	ARFGAP2_3	hsa04144	Endocytosis	COG5347	U:Intracellular trafficking, secretion, and vesicular transport	PF01412.15	ArfGap	Putative GTPase activating protein for Arf	cytoplasmic	2	5	56.9	High
Q8N5M9	Protein jagunal homolog 1 OS=Homo sapiens OX=9606 GN=JAGN1 PE=1 SV=1	1.31065	0.390283	0.03301	up	yes	1.329	1.014	BP:regulation of peptide transport;BP:protein localization;BP:regulation of secretion;BP:negative regulation of secretion;BP:negative regulation of response to stimulus;BP:regulation of response to stimulus;BP:neutrophil differentiation;BP:signal transduction;BP:cell surface receptor signaling pathway;BP:cellular component organization or biogenesis;BP:cytokine-mediated signaling pathway;BP:singl…	GO:0090087;GO:0008104;GO:0051046;GO:0051048;GO:0048585;GO:0048583;GO:0030223;GO:0007165;GO:0007166;GO:0071840;GO:0019221;GO:0044710;GO:0043207;GO:0048869;GO:0030851;GO:0090278;GO:0051049;GO:0048519;GO:0033036;GO:0051051;GO:0045184;GO:0090276;GO:0032845;GO:0032844;GO:0051707;GO:0055114;GO:0051704;GO:0065008;GO:0009607;GO:0009605;GO:0048870;GO:0002376;GO:1903530;GO:0051716;GO:0006928;GO:0050789;GO:…	------	------	------	------	------	------	PF07086.9	Jagunal	Jagunal, ER re-organisation during oogenesis	peroxisomal	3	14	21.1	High
P46977	Dolichyl-diphosphooligosaccharide--protein glycosyltransferase subunit STT3A OS=Homo sapiens OX=9606 GN=STT3A PE=1 SV=2	1.40699	0.492611	0.02058	up	yes	1.369	0.973	BP:peptidyl-amino acid modification;BP:single-organism catabolic process;BP:single-organism metabolic process;BP:single-organism biosynthetic process;BP:cellular glucan metabolic process;BP:energy reserve metabolic process;BP:myeloid cell activation involved in immune response;BP:oxidation-reduction process;BP:vesicle-mediated transport;BP:cellular catabolic process;BP:protein metabolic process;B…	GO:0018193;GO:0044712;GO:0044710;GO:0044711;GO:0006073;GO:0006112;GO:0002275;GO:0055114;GO:0016192;GO:0044248;GO:0019538;GO:0002274;GO:0016052;GO:0016051;GO:0002376;GO:0045321;GO:0051179;GO:0033692;GO:0044267;GO:1901575;GO:0044262;GO:0044260;GO:0006887;GO:0045055;GO:0002366;GO:0044699;GO:0000271;GO:0006810;GO:0043412;GO:0043413;GO:0008150;GO:0008152;GO:0044723;GO:0002283;GO:0051234;GO:0044724;GO:…	K07151	STT3	hsa04141;hsa00510	Protein processing in endoplasmic reticulum;N-Glycan biosynthesis	COG1287	R:General function prediction only	PF02516.11	STT3	Oligosaccharyl transferase STT3 subunit	ER	15	24	80.5	High
Q9NQT4	Exosome complex component RRP46 OS=Homo sapiens OX=9606 GN=EXOSC5 PE=1 SV=1	1.24138	0.311944	0.03057	up	yes	1.296	1.044	BP:regulation of metabolic process;BP:organic cyclic compound metabolic process;BP:organic cyclic compound catabolic process;BP:snRNA processing;BP:DNA modification;BP:response to external biotic stimulus;BP:response to virus;BP:U4 snRNA 3'-end processing;BP:polyadenylation-dependent snoRNA 3'-end processing;BP:snRNA 3'-end processing;BP:multi-organism process;BP:regulation of macromolecule metab…	GO:0019222;GO:1901360;GO:1901361;GO:0016180;GO:0006304;GO:0043207;GO:0009615;GO:0034475;GO:0071051;GO:0034472;GO:0051704;GO:0060255;GO:0051707;GO:0046483;GO:0009607;GO:0010468;GO:0002376;GO:0051607;GO:0006807;GO:0034661;GO:0034660;GO:1901575;GO:0044265;GO:0043144;GO:0065007;GO:0006364;GO:0065008;GO:0006139;GO:0046700;GO:0006952;GO:0019439;GO:0043412;GO:0008150;GO:0008152;GO:0034655;GO:0016070;GO:…	K12590	RRP46, EXOSC5	hsa03018	RNA degradation	COG0689	J:Translation, ribosomal structure and biogenesis	PF01138.18;PF03725.12	RNase_PH;RNase_PH_C	3' exoribonuclease family, domain 1;3' exoribonuclease family, domain 2	cytoplasmic	2	9	25.2	High
P62277	40S ribosomal protein S13 OS=Homo sapiens OX=9606 GN=RPS13 PE=1 SV=2	1.25241	0.324705	0.03038	up	yes	1.3	1.038	BP:protein localization;BP:regulation of primary metabolic process;BP:regulation of metabolic process;BP:membrane organization;BP:organic cyclic compound biosynthetic process;BP:organic cyclic compound metabolic process;BP:single-organism metabolic process;BP:negative regulation of macromolecule metabolic process;BP:cellular macromolecule localization;BP:peptide biosynthetic process;BP:negative r…	GO:0008104;GO:0080090;GO:0019222;GO:0061024;GO:1901362;GO:1901360;GO:0044710;GO:0010605;GO:0070727;GO:0043043;GO:0048519;GO:0033036;GO:0006364;GO:0034470;GO:0060255;GO:0006605;GO:0045184;GO:0072657;GO:1901564;GO:0046486;GO:0046483;GO:0019538;GO:0019438;GO:0007165;GO:0009892;GO:0006613;GO:0019083;GO:0006614;GO:0010629;GO:0006807;GO:0034660;GO:0050789;GO:1901576;GO:1901575;GO:0044265;GO:0044260;GO:…	K02953	RP-S13e, RPS13	hsa03010	Ribosome	COG0184	J:Translation, ribosomal structure and biogenesis	PF08069.9;PF00312.19	Ribosomal_S13_N;Ribosomal_S15	Ribosomal S13/S15 N-terminal domain;Ribosomal protein S15	mitochondrial	7	42	17.2	High
F5GYQ1	V-type proton ATPase subunit OS=Homo sapiens OX=9606 GN=ATP6V0D1 PE=1 SV=1	1.34336	0.425844	0.00031	up	yes	1.34	0.9975	BP:hydrogen ion transmembrane transport;BP:adherens junction organization;BP:cell junction maintenance;BP:cell junction organization;BP:adherens junction maintenance;BP:regulation of biological process;BP:signal transduction;BP:ATP hydrolysis coupled transmembrane transport;BP:single-organism process;BP:proton transport;BP:ATP hydrolysis coupled proton transport;BP:cellular component organization…	GO:1902600;GO:0034332;GO:0034331;GO:0034330;GO:0034334;GO:0050789;GO:0007165;GO:0090662;GO:0044699;GO:0015992;GO:0015991;GO:0071840;GO:0016043;GO:0051179;GO:0065007;GO:0098662;GO:0098660;GO:0015672;GO:0006818;GO:0006812;GO:0006811;GO:0006810;GO:0050794;GO:0034220;GO:0044765;GO:0008150;GO:0045216;GO:0051234;GO:0043954;GO:0055085;GO:1902578;GO:0015988;GO:0044763;GO:0009987;GO:0098655;GO:0098796;GO:…	------	------	------	------	COG1527	C:Energy production and conversion	PF01992.13	vATP-synt_AC39	ATP synthase	cytoplasmic	11	38	44.6	High
A0A2R8YD14	40S ribosomal protein S24 OS=Homo sapiens OX=9606 GN=RPS24 PE=1 SV=1	1.23218	0.30121	0.02738	up	yes	1.279	1.038	BP:protein localization;BP:membrane organization;BP:organic cyclic compound biosynthetic process;BP:organic cyclic compound metabolic process;BP:organic cyclic compound catabolic process;BP:cellular macromolecule localization;BP:myeloid cell homeostasis;BP:macromolecule localization;BP:rRNA processing;BP:ncRNA processing;BP:protein targeting;BP:establishment of protein localization;BP:maturation …	GO:0008104;GO:0061024;GO:1901362;GO:1901360;GO:1901361;GO:0070727;GO:0002262;GO:0033036;GO:0006364;GO:0034470;GO:0006605;GO:0045184;GO:0000462;GO:0072657;GO:0046483;GO:0048872;GO:0002376;GO:0019438;GO:0006613;GO:0006612;GO:0006614;GO:0006807;GO:0034660;GO:1901576;GO:1901575;GO:0044265;GO:0044260;GO:0006886;GO:0016043;GO:0065007;GO:0071840;GO:0065008;GO:0018130;GO:0006810;GO:0046700;GO:0019439;GO:…	K02974	RP-S24e, RPS24	hsa03010	Ribosome	COG2004	J:Translation, ribosomal structure and biogenesis	PF01282.16	Ribosomal_S24e	Ribosomal protein S24e	cytoplasmic	5	28	19.2	High
Q9H488	GDP-fucose protein O-fucosyltransferase 1 OS=Homo sapiens OX=9606 GN=POFUT1 PE=1 SV=1	1.39969	0.485106	0.01035	up	yes	1.35	0.9645	BP:regulation of metabolic process;BP:regulation of response to stimulus;BP:signal transduction;BP:cell surface receptor signaling pathway;BP:regulation of primary metabolic process;BP:single-organism metabolic process;BP:Notch signaling pathway;BP:regulation of signal transduction;BP:animal organ development;BP:regulation of macromolecule metabolic process;BP:regionalization;BP:regulation of RNA…	GO:0019222;GO:0048583;GO:0007165;GO:0007166;GO:0080090;GO:0044710;GO:0007219;GO:0009966;GO:0048513;GO:0060255;GO:0003002;GO:2001141;GO:0001756;GO:0044707;GO:0019538;GO:0044281;GO:0050789;GO:0036065;GO:0044267;GO:0036066;GO:0044260;GO:0065007;GO:0048646;GO:0016266;GO:0019318;GO:0009889;GO:0050794;GO:0043412;GO:0043413;GO:0008150;GO:0008152;GO:0044723;GO:0009952;GO:0006355;GO:0010556;GO:0023051;GO:…	K03691	POFUT	hsa00514	Other types of O-glycan biosynthesis	------	------	PF10250.6	O-FucT	GDP-fucose protein O-fucosyltransferase	ER	5	24	43.9	High
P69905	Hemoglobin subunit alpha OS=Homo sapiens OX=9606 GN=HBA1 PE=1 SV=2	1.34754	0.430327	0.0041	up	yes	1.328	0.9855	BP:anion transport;BP:small molecule metabolic process;BP:small molecule catabolic process;BP:cellular component organization or biogenesis;BP:single-organism catabolic process;BP:macromolecular complex assembly;BP:single-organism metabolic process;BP:cellular oxidant detoxification;BP:positive regulation of biological process;BP:dicarboxylic acid catabolic process;BP:protein heterooligomerizatio…	GO:0006820;GO:0044281;GO:0044282;GO:0071840;GO:0044712;GO:0065003;GO:0044710;GO:0098869;GO:0048518;GO:0043649;GO:0051291;GO:0015711;GO:1990748;GO:0043436;GO:0010035;GO:0043648;GO:0016192;GO:0016054;GO:0015701;GO:0022607;GO:0000302;GO:0042744;GO:0042743;GO:0098754;GO:0050789;GO:1901575;GO:0065007;GO:0006461;GO:0006811;GO:0006810;GO:0050794;GO:0006950;GO:0008150;GO:0008152;GO:0051234;GO:0006897;GO:…	K13822	HBA	hsa05143;hsa05144	African trypanosomiasis;Malaria	COG1018	C:Energy production and conversion	PF00042.19	Globin	Globin	cytoplasmic	3	22	15.2	High
Q9NQ29	Putative RNA-binding protein Luc7-like 1 OS=Homo sapiens OX=9606 GN=LUC7L PE=1 SV=1	1.32529	0.406307	0.01862	up	yes	1.318	0.9945	BP:regulation of response to stimulus;BP:cellular component organization or biogenesis;BP:leukocyte mediated cytotoxicity;BP:regulation of immune system process;BP:cell killing;BP:regulation of striated muscle tissue development;BP:lymphocyte activation;BP:immune system process;BP:mRNA splice site selection;BP:negative regulation of striated muscle tissue development;BP:cellular component assembl…	GO:0048583;GO:0071840;GO:0001909;GO:0002682;GO:0001906;GO:0016202;GO:0046649;GO:0002376;GO:0006376;GO:0045843;GO:0022607;GO:0045321;GO:0016043;GO:0065003;GO:0065007;GO:1901861;GO:1901862;GO:0050793;GO:0006952;GO:0006950;GO:0008150;GO:0051239;GO:0006955;GO:0050896;GO:0042267;GO:0001775;GO:0048635;GO:0048634;GO:0044699;GO:0051241;GO:0022618;GO:0002228;GO:0022610;GO:0009987;GO:0048519;GO:0051093;GO:…	------	------	------	------	COG5200	A:RNA processing and modification	PF03194.12	LUC7	LUC7 N_terminus	nuclear	3	23	43.7	High
P08236	Beta-glucuronidase OS=Homo sapiens OX=9606 GN=GUSB PE=1 SV=2	1.27679	0.352516	0.03044	up	yes	1.287	1.008	BP:nucleobase-containing compound metabolic process;BP:organic cyclic compound biosynthetic process;BP:organic cyclic compound metabolic process;BP:single-organism catabolic process;BP:single-organism metabolic process;BP:biological regulation;BP:hyaluronan metabolic process;BP:hyaluronan catabolic process;BP:heterocycle metabolic process;BP:organonitrogen compound metabolic process;BP:organonitr…	GO:0006139;GO:1901362;GO:1901360;GO:0044712;GO:0044710;GO:0065007;GO:0030212;GO:0030214;GO:0046483;GO:1901564;GO:1901565;GO:0002274;GO:0002376;GO:0019438;GO:0030203;GO:0045321;GO:0006807;GO:0051179;GO:1901576;GO:1901575;GO:0006887;GO:0045055;GO:0002366;GO:0006367;GO:0018130;GO:0006810;GO:0050794;GO:0001775;GO:0008150;GO:0008152;GO:0034654;GO:0051234;GO:0016070;GO:0046903;GO:0044271;GO:0043312;GO:…	K01195	uidA, GUSB	hsa00983;hsa00860;hsa04142;hsa00040;hsa00531	Drug metabolism - other enzymes;Porphyrin and chlorophyll metabolism;Lysosome;Pentose and glucuronate interconversions;Glycosaminoglycan degradation	COG3250	G:Carbohydrate transport and metabolism	PF02836.14;PF02837.15;PF00703.18	Glyco_hydro_2_C;Glyco_hydro_2_N;Glyco_hydro_2	Glycosyl hydrolases family 2, TIM barrel domain;Glycosyl hydrolases family 2, sugar binding domain;Glycosyl hydrolases family 2	lysosomal	2	5	74.7	High
Q4G148	Glucoside xylosyltransferase 1 OS=Homo sapiens OX=9606 GN=GXYLT1 PE=1 SV=2	1.2703	0.345166	0.03293	up	yes	1.283	1.01	BP:single-organism metabolic process;BP:organonitrogen compound metabolic process;BP:protein metabolic process;BP:glycosaminoglycan metabolic process;BP:nitrogen compound metabolic process;BP:cellular protein metabolic process;BP:cellular macromolecule metabolic process;BP:O-glycan processing;BP:macromolecule modification;BP:macromolecule glycosylation;BP:biological_process;BP:metabolic process;B…	GO:0044710;GO:1901564;GO:0019538;GO:0030203;GO:0006807;GO:0044267;GO:0044260;GO:0016266;GO:0043412;GO:0043413;GO:0008150;GO:0008152;GO:0044723;GO:0036211;GO:0006493;GO:0044699;GO:0005975;GO:1901135;GO:0043170;GO:0006486;GO:0071704;GO:0009987;GO:0070085;GO:0006464;GO:0006022;GO:0044763;GO:0044238;GO:0044237;GO:0016021;GO:0016020;GO:0016459;GO:0098588;GO:0043234;GO:0044424;GO:0044425;GO:0044422;GO:…	K13676	GXYLT	hsa00514	Other types of O-glycan biosynthesis	------	------	PF01501.17	Glyco_transf_8	Glycosyl transferase family 8	Golgi apparatus	3	8	50.5	High
P07355	Annexin A2 OS=Homo sapiens OX=9606 GN=ANXA2 PE=1 SV=2	1.26706	0.341487	0.01392	up	yes	1.281	1.011	BP:positive regulation of receptor-mediated endocytosis involved in cholesterol transport;BP:regulation of transport;BP:membrane budding;BP:skeletal system development;BP:positive regulation of low-density lipoprotein particle receptor binding;BP:positive regulation of low-density lipoprotein receptor activity;BP:regulation of organelle organization;BP:negative regulation by host of symbiont mole…	GO:1905602;GO:0051049;GO:0006900;GO:0001501;GO:1905597;GO:1905599;GO:0033043;GO:0052405;GO:0048468;GO:0051291;GO:0051290;GO:2000644;GO:0042325;GO:0042327;GO:0044359;GO:0019538;GO:0010638;GO:0009894;GO:0009895;GO:0009892;GO:0009893;GO:0044035;GO:0044033;GO:0050789;GO:0032091;GO:0048261;GO:0006886;GO:0006887;GO:2000273;GO:0098609;GO:0050794;GO:0008150;GO:0001775;GO:0048146;GO:0048145;GO:0051129;GO:…	K17092	ANXA2	------	------	------	------	PF00191.17	Annexin	Annexin	cytoplasmic	19	78	38.6	High
Q6PI48	Aspartate--tRNA ligase, mitochondrial OS=Homo sapiens OX=9606 GN=DARS2 PE=1 SV=1	1.2361	0.305793	0.02117	up	yes	1.267	1.025	BP:small molecule metabolic process;BP:cellular component organization or biogenesis;BP:single-organism metabolic process;BP:peptide biosynthetic process;BP:oxoacid metabolic process;BP:heterocycle metabolic process;BP:organonitrogen compound metabolic process;BP:organonitrogen compound biosynthetic process;BP:protein metabolic process;BP:amino acid activation;BP:tRNA aminoacylation;BP:cellular c…	GO:0044281;GO:0071840;GO:0044710;GO:0043043;GO:0043436;GO:0046483;GO:1901564;GO:1901566;GO:0019538;GO:0043038;GO:0043039;GO:0022607;GO:0006807;GO:0034660;GO:0044267;GO:0044260;GO:0016043;GO:0065003;GO:1901360;GO:0006421;GO:0008150;GO:0008152;GO:0016070;GO:0044271;GO:0043603;GO:0006518;GO:0044249;GO:0034641;GO:0034645;GO:0044699;GO:0006139;GO:0070145;GO:0009987;GO:0006725;GO:0051259;GO:0043604;GO:…	K01876	DARS, aspS	hsa00970	Aminoacyl-tRNA biosynthesis	COG0173	J:Translation, ribosomal structure and biogenesis	PF00152.17;PF02938.11;PF01336.22	tRNA-synt_2;GAD;tRNA_anti-codon	tRNA synthetases class II;GAD domain;OB-fold nucleic acid binding domain	mitochondrial	10	20	73.5	High
Q96HL8	SH3 domain-containing YSC84-like protein 1 OS=Homo sapiens OX=9606 GN=SH3YL1 PE=1 SV=1	1.36045	0.444087	0.02126	up	yes	1.321	0.971	BP:glycerolipid metabolic process;BP:glycerophospholipid metabolic process;BP:regulation of cellular component organization;BP:metabolic process;BP:regulation of biological process;BP:single-organism biosynthetic process;BP:maintenance of location in cell;BP:cellular component organization or biogenesis;BP:lipid metabolic process;BP:glycerolipid biosynthetic process;BP:single-organism metabolic p…	GO:0046486;GO:0006650;GO:0051128;GO:0008152;GO:0050789;GO:0044711;GO:0051651;GO:0071840;GO:0006629;GO:0045017;GO:0044710;GO:0019637;GO:1900027;GO:0040008;GO:0006796;GO:0016043;GO:0071704;GO:0065007;GO:0044699;GO:0006661;GO:0065008;GO:0031344;GO:0044255;GO:0006644;GO:0032507;GO:1901576;GO:0009987;GO:0050794;GO:0045185;GO:0009058;GO:0001558;GO:0008150;GO:0051235;GO:0090407;GO:0051179;GO:1902578;GO:…	K20523	SH3YL1	------	------	COG2930	S:Function unknown	PF04366.9;PF00018.25;PF14604.3;PF07653.14	Ysc84;SH3_1;SH3_9;SH3_2	Las17-binding protein actin regulator;SH3 domain;Variant SH3 domain;Variant SH3 domain	cytoplasmic	1	2	37.1	Medium
Q9BUH6	Protein PAXX OS=Homo sapiens OX=9606 GN=PAXX PE=1 SV=2	1.37552	0.459976	0.01197	up	yes	1.326	0.964	BP:primary metabolic process;BP:signal transduction;BP:nucleobase-containing compound metabolic process;BP:DNA ligation involved in DNA repair;BP:cell-matrix adhesion;BP:regulation of biological process;BP:cellular nitrogen compound metabolic process;BP:nitrogen compound metabolic process;BP:cell surface receptor signaling pathway;BP:organic cyclic compound metabolic process;BP:single-organism me…	GO:0044238;GO:0007165;GO:0006139;GO:0051103;GO:0007160;GO:0050789;GO:0034641;GO:0006807;GO:0007166;GO:1901360;GO:0044710;GO:0006303;GO:0006302;GO:0044260;GO:0046483;GO:0071704;GO:0006266;GO:0065007;GO:0044699;GO:0022610;GO:0031589;GO:0033554;GO:0006281;GO:0007229;GO:0009987;GO:0006725;GO:0051716;GO:0050794;GO:0006974;GO:0006259;GO:0006950;GO:0008150;GO:0008152;GO:0007155;GO:0000726;GO:0090304;GO:…	------	------	------	------	------	------	PF15384.3	PAXX	PAXX, PAralog of XRCC4 and XLF, also called C9orf142	cytoplasmic	2	13	21.6	High
O75915	PRA1 family protein 3 OS=Homo sapiens OX=9606 GN=ARL6IP5 PE=1 SV=1	1.35321	0.436389	0.006419	up	yes	1.316	0.9725	BP:regulation of transport;BP:dendrite development;BP:regulation of actin polymerization or depolymerization;BP:cellular response to stimulus;BP:regulation of cytoskeleton organization;BP:organic acid transport;BP:dicarboxylic acid transport;BP:regulation of phosphorylation;BP:positive regulation of phosphorylation;BP:positive regulation of metabolic process;BP:positive regulation of biosynthetic…	GO:0051049;GO:0016358;GO:0008064;GO:0051716;GO:0051493;GO:0015849;GO:0006835;GO:0042325;GO:0042327;GO:0009893;GO:0009891;GO:0031175;GO:0035556;GO:0050789;GO:0051345;GO:0002684;GO:0002682;GO:2000278;GO:0043410;GO:0032956;GO:0032890;GO:0032891;GO:0050794;GO:0010557;GO:0010556;GO:0048814;GO:0009967;GO:0051128;GO:0014070;GO:0060284;GO:0015813;GO:2000573;GO:0002220;GO:0002223;GO:0050870;GO:0051952;GO:…	K20393	ARL6IP5, PRAF3	------	------	------	------	PF03208.16	PRA1	PRA1 family protein	cytoplasmic	5	24	21.6	High
P61026	Ras-related protein Rab-10 OS=Homo sapiens OX=9606 GN=RAB10 PE=1 SV=1	1.28922	0.366502	0.01003	up	yes	1.286	0.9975	BP:asymmetric protein localization;BP:protein localization;BP:regulation of phosphate metabolic process;BP:regulation of metabolic process;BP:vesicle docking involved in exocytosis;BP:membrane organization;BP:plasma membrane organization;BP:establishment or maintenance of cell polarity;BP:signal transduction;BP:positive regulation of cyclin-dependent protein kinase activity;BP:cellular response t…	GO:0008105;GO:0008104;GO:0019220;GO:0019222;GO:0006904;GO:0061024;GO:0007009;GO:0007163;GO:0007165;GO:1904031;GO:0051716;GO:0007409;GO:0070727;GO:0048869;GO:0001775;GO:0044093;GO:0048522;GO:0048518;GO:0065007;GO:0033036;GO:0051254;GO:0030154;GO:0060255;GO:0045859;GO:0042327;GO:0045184;GO:0048278;GO:0032268;GO:0072657;GO:2001141;GO:0043434;GO:0010033;GO:0016192;GO:0035556;GO:0010243;GO:0006355;GO:…	K07903	RAB10	hsa04152;hsa04144	AMPK signaling pathway;Endocytosis	------	------	PF00071.19;PF08477.10;PF00025.18	Ras;Roc;Arf	Ras family;Ras of Complex, Roc, domain of DAPkinase;ADP-ribosylation factor family	cytoplasmic	12	69	22.5	High
Q6V1P9	Protocadherin-23 OS=Homo sapiens OX=9606 GN=DCHS2 PE=2 SV=1	1.36935	0.453492	0.04327	up	yes	1.318	0.9625	BP:biological adhesion;BP:developmental process;BP:cell-cell adhesion;BP:system development;BP:biological_process;BP:cell adhesion;BP:homophilic cell adhesion via plasma membrane adhesion molecules;BP:cell-cell adhesion via plasma-membrane adhesion molecules;BP:nervous system development;BP:anatomical structure development;CC:intrinsic component of membrane;CC:integral component of membrane;CC:me…	GO:0022610;GO:0032502;GO:0098609;GO:0048731;GO:0008150;GO:0007155;GO:0007156;GO:0098742;GO:0007399;GO:0048856;GO:0031224;GO:0016021;GO:0016020;GO:0005886;GO:0044464;GO:0005575;GO:0044425;GO:0003674;GO:0005488;GO:0043169;GO:0043167;GO:0005509;GO:0046872	K16507	DCHS1_2, PCDH16_23	hsa04392	Hippo signaling pathway -multiple species	------	------	PF00028.14;PF08266.9;PF16184.2	Cadherin;Cadherin_2;Cadherin_3	Cadherin domain;Cadherin-like;Cadherin-like	cytoplasmic	1	0	322	High
P08243	Asparagine synthetase [glutamine-hydrolyzing] OS=Homo sapiens OX=9606 GN=ASNS PE=1 SV=4	1.33197	0.413561	0.01278	up	yes	1.302	0.9775	BP:small molecule metabolic process;BP:small molecule biosynthetic process;BP:peptide biosynthetic process;BP:cellular response to starvation;BP:response to amino acid;BP:single-organism metabolic process;BP:single-organism biosynthetic process;BP:positive regulation of cell cycle;BP:glutamine metabolic process;BP:cellular response to organic substance;BP:response to mechanical stimulus;BP:animal…	GO:0044281;GO:0044283;GO:0043043;GO:0009267;GO:0043200;GO:0044710;GO:0044711;GO:0045787;GO:0006541;GO:0071310;GO:0009612;GO:0048513;GO:0034698;GO:0048519;GO:0060548;GO:0043436;GO:0010033;GO:0031668;GO:0031669;GO:1901564;GO:0009605;GO:1901566;GO:0070981;GO:0010243;GO:0016053;GO:0019538;GO:0033554;GO:0070982;GO:0007165;GO:0034645;GO:0031667;GO:0006807;GO:0009064;GO:0042981;GO:0050789;GO:1901576;GO:…	K01953	asnB, ASNS	hsa00250	Alanine, aspartate and glutamate metabolism	COG0367	E:Amino acid transport and metabolism	PF00733.18;PF13537.3;PF13522.3;PF12481.5	Asn_synthase;GATase_7;GATase_6;DUF3700	Asparagine synthase;Glutamine amidotransferase domain;Glutamine amidotransferase domain;Aluminium induced protein	cytoplasmic	11	27	64.3	High
P62318	Small nuclear ribonucleoprotein Sm D3 OS=Homo sapiens OX=9606 GN=SNRPD3 PE=1 SV=1	1.26541	0.339602	0.009145	up	yes	1.273	1.006	BP:protein methylation;BP:nuclear transport;BP:spliceosomal complex assembly;BP:organic cyclic compound biosynthetic process;BP:cellular component organization or biogenesis;BP:macromolecular complex assembly;BP:heterocycle metabolic process;BP:protein metabolic process;BP:mRNA splicing, via spliceosome;BP:aromatic compound biosynthetic process;BP:cellular component assembly;BP:nitrogen compound …	GO:0006479;GO:0051169;GO:0000245;GO:1901362;GO:0071840;GO:0065003;GO:0046483;GO:0019538;GO:0000398;GO:0019438;GO:0022607;GO:0006807;GO:0044267;GO:0000387;GO:0044260;GO:0016043;GO:1901360;GO:0006369;GO:0032259;GO:0018130;GO:0006810;GO:0043412;GO:0036211;GO:0043414;GO:0008152;GO:0034654;GO:0051234;GO:0016070;GO:0016071;GO:0044271;GO:0046907;GO:0000377;GO:0006353;GO:0008150;GO:0032774;GO:0008334;GO:…	K11088	SNRPD3, SMD3	hsa05322;hsa03040	Systemic lupus erythematosus;Spliceosome	COG1958	K:Transcription	PF01423.19	LSM	LSM domain	cytoplasmic	5	52	13.9	High
P34897	Serine hydroxymethyltransferase, mitochondrial OS=Homo sapiens OX=9606 GN=SHMT2 PE=1 SV=3	1.22843	0.296817	0.01032	up	yes	1.253	1.02	BP:protein metabolic process;BP:regulation of phosphate metabolic process;BP:regulation of primary metabolic process;BP:regulation of metabolic process;BP:protein homotetramerization;BP:regulation of cellular macromolecule biosynthetic process;BP:negative regulation of cellular macromolecule biosynthetic process;BP:regulation of ATP metabolic process;BP:nucleotide biosynthetic process;BP:deoxyrib…	GO:0019538;GO:0019220;GO:0080090;GO:0019222;GO:0051289;GO:2000112;GO:2000113;GO:1903578;GO:0009165;GO:0009162;GO:0042558;GO:0044282;GO:0044283;GO:0006220;GO:1901362;GO:1901360;GO:0010243;GO:0044712;GO:0044710;GO:0044711;GO:0042440;GO:1901565;GO:0006545;GO:0006544;GO:0070647;GO:0070646;GO:0010033;GO:0009219;GO:0048518;GO:0048519;GO:0070536;GO:0042127;GO:0006767;GO:0006766;GO:0006760;GO:0060255;GO:…	K00600	glyA, SHMT	hsa01523;hsa00670;hsa00630;hsa01230;hsa01200;hsa00260	Antifolate resistance;One carbon pool by folate;Glyoxylate and dicarboxylate metabolism;Biosynthesis of amino acids;Carbon metabolism;Glycine, serine and threonine metabolism	COG0112	E:Amino acid transport and metabolism	PF00464.16	SHMT	Serine hydroxymethyltransferase	mitochondrial	13	70	56	High
A0A2R8Y5Q8	Tubulin-specific chaperone E OS=Homo sapiens OX=9606 GN=TBCE PE=1 SV=1	1.25397	0.326501	0.01127	up	yes	1.264	1.008	------	------	------	------	------	------	------	------	PF12799.4;PF01302.22;PF13855.3;PF14580.3	LRR_4;CAP_GLY;LRR_8;LRR_9	Leucine Rich repeats;CAP-Gly domain;Leucine rich repeat;Leucine-rich repeat	cytoplasmic	4	14	61.8	High
E9PGC5	Receptor-type tyrosine-protein phosphatase kappa OS=Homo sapiens OX=9606 GN=PTPRK PE=1 SV=1	1.25845	0.331647	0.01558	up	yes	1.266	1.006	BP:regulation of small GTPase mediated signal transduction;BP:dephosphorylation;BP:protein dephosphorylation;BP:negative regulation of response to stimulus;BP:regulation of Ras protein signal transduction;BP:negative regulation of signaling;BP:regulation of signaling;BP:peptidyl-tyrosine dephosphorylation;BP:cellular protein metabolic process;BP:regulation of cell communication;BP:cellular macrom…	GO:0051056;GO:0016311;GO:0006470;GO:0048585;GO:0046578;GO:0023057;GO:0023051;GO:0035335;GO:0044267;GO:0010646;GO:0044260;GO:0009966;GO:0050789;GO:0071704;GO:0009968;GO:0065007;GO:0048519;GO:0007165;GO:0048583;GO:0009987;GO:0051058;GO:0043412;GO:0036211;GO:0008150;GO:0006464;GO:0008152;GO:1902532;GO:1902531;GO:0050794;GO:0044238;GO:0019538;GO:0046580;GO:0044237;GO:0043170;GO:0006796;GO:0010648;GO:…	------	------	------	------	COG5599	T:Signal transduction mechanisms	PF00102.24;PF00629.20;PF00041.18;PF00782.17;PF07679.13	Y_phosphatase;MAM;fn3;DSPc;I-set	Protein-tyrosine phosphatase;MAM domain, meprin/A5/mu;Fibronectin type III domain;Dual specificity phosphatase, catalytic domain;Immunoglobulin I-set domain	ER	2	2	165.9	High
Q14094	Cyclin-I OS=Homo sapiens OX=9606 GN=CCNI PE=1 SV=1	1.22309	0.290533	0.01038	up	yes	1.25	1.022	BP:cell differentiation;BP:multicellular organism development;BP:regulation of biological process;BP:single-organism process;BP:cellular developmental process;BP:biological regulation;BP:gamete generation;BP:developmental process;BP:multicellular organismal process;BP:multicellular organismal reproductive process;BP:cellular process;BP:regulation of cellular process;BP:single-organism development…	GO:0030154;GO:0007275;GO:0050789;GO:0044699;GO:0048869;GO:0065007;GO:0007276;GO:0032502;GO:0032501;GO:0048609;GO:0009987;GO:0050794;GO:0044767;GO:0022414;GO:0007283;GO:0008150;GO:0048232;GO:0044702;GO:0044707;GO:0051726;GO:0048856;GO:0044763;GO:0033150;GO:0043229;GO:0043227;GO:0043226;GO:0044446;GO:0005634;GO:0044430;GO:0043231;GO:0044464;GO:0005575;GO:0044444;GO:0044424;GO:0044422;GO:0005200;GO:…	------	------	------	------	COG5024	D:Cell cycle control, cell division, chromosome partitioning	PF00134.20	Cyclin_N	Cyclin, N-terminal domain	nuclear	1	3	42.5	Medium
P05141	ADP/ATP translocase 2 OS=Homo sapiens OX=9606 GN=SLC25A5 PE=1 SV=7	1.25723	0.330247	0.01135	up	yes	1.261	1.003	BP:negative regulation of apoptotic signaling pathway;BP:regulation of peptide transport;BP:regulation of secretion;BP:regulation of apoptotic signaling pathway;BP:regulation of transport;BP:regulation of intracellular transport;BP:negative regulation of intracellular transport;BP:regulation of response to stimulus;BP:membrane organization;BP:cellular component organization or biogenesis;BP:cellu…	GO:2001234;GO:0090087;GO:0051046;GO:2001233;GO:0051049;GO:0032386;GO:0032387;GO:0048583;GO:0061024;GO:0071840;GO:0051716;GO:0009968;GO:0043043;GO:0043067;GO:0044419;GO:0048518;GO:0048519;GO:0048585;GO:0042127;GO:0051051;GO:0060548;GO:0015711;GO:0090276;GO:1901564;GO:0051128;GO:0010033;GO:0051704;GO:0044249;GO:0019538;GO:0043069;GO:0010639;GO:1903530;GO:0015853;GO:0034645;GO:0015851;GO:0015858;GO:…	K05863	SLC25A4S, ANT	hsa04022;hsa04020;hsa05166;hsa05016;hsa05012	cGMP-PKG signaling pathway;Calcium signaling pathway;HTLV-I infection;Huntington's disease;Parkinson's disease	------	------	PF00153.24	Mito_carr	Mitochondrial carrier protein	cytoplasmic	7	51	32.8	High
O75787	Renin receptor OS=Homo sapiens OX=9606 GN=ATP6AP2 PE=1 SV=2	1.33954	0.421743	0.02637	up	yes	1.294	0.966	BP:regulation of phosphate metabolic process;BP:regulation of primary metabolic process;BP:regulation of metabolic process;BP:eye pigmentation;BP:positive regulation of response to stimulus;BP:regulation of response to stimulus;BP:developmental pigmentation;BP:regulation of Wnt signaling pathway;BP:signal transduction;BP:hormone metabolic process;BP:regulation of signal transduction;BP:positive r…	GO:0019220;GO:0080090;GO:0019222;GO:0048069;GO:0048584;GO:0048583;GO:0048066;GO:0030111;GO:0007165;GO:0042445;GO:0009966;GO:0009967;GO:0048518;GO:0060255;GO:0003002;GO:0071636;GO:1901564;GO:0042325;GO:0065008;GO:0016192;GO:0044707;GO:0019538;GO:0002275;GO:0002274;GO:0060323;GO:0002376;GO:0010647;GO:0045321;GO:0032940;GO:0006807;GO:0050789;GO:0002283;GO:0009653;GO:0006887;GO:0045055;GO:0002366;GO:…	K19514	ATP6AP2, PRR	hsa04614	Renin-angiotensin system	------	------	PF07850.11	Renin_r	Renin receptor-like protein	lysosomal	3	11	39	High
Q9BQC6	Ribosomal protein 63, mitochondrial OS=Homo sapiens OX=9606 GN=MRPL57 PE=1 SV=1	1.24553	0.316756	0.04669	up	yes	1.253	1.006	BP:mitochondrion organization;BP:single-organism metabolic process;BP:single-organism biosynthetic process;BP:peptide biosynthetic process;BP:single organism signaling;BP:organonitrogen compound metabolic process;BP:organonitrogen compound biosynthetic process;BP:protein metabolic process;BP:anterograde trans-synaptic signaling;BP:mitochondrial translational termination;BP:organic substance biosy…	GO:0007005;GO:0044710;GO:0044711;GO:0043043;GO:0044700;GO:1901564;GO:1901566;GO:0019538;GO:0098916;GO:0070126;GO:1901576;GO:0044260;GO:0016043;GO:0071840;GO:0032543;GO:0008150;GO:0008152;GO:0044271;GO:0022411;GO:0006518;GO:0099536;GO:0099537;GO:0044249;GO:0034641;GO:0023052;GO:0034645;GO:0043241;GO:0044699;GO:0009987;GO:0043604;GO:0043603;GO:0043170;GO:0006807;GO:0043933;GO:0032984;GO:0071822;GO:…	------	------	------	------	------	------	PF14978.3	MRP-63	Mitochondrial ribosome protein 63	mitochondrial	1	13	12.3	High
Q8WUX2	Glutathione-specific gamma-glutamylcyclotransferase 2 OS=Homo sapiens OX=9606 GN=CHAC2 PE=1 SV=1	1.23123	0.300095	0.03947	up	yes	1.246	1.012	BP:cellular modified amino acid biosynthetic process;BP:cellular modified amino acid catabolic process;BP:amino acid transport;BP:cellular catabolic process;BP:cellular biosynthetic process;BP:anion transport;BP:peptide catabolic process;BP:glutathione biosynthetic process;BP:single-organism process;BP:organic substance catabolic process;BP:peptide biosynthetic process;BP:nitrogen compound transp…	GO:0042398;GO:0042219;GO:0006865;GO:0044248;GO:0044249;GO:0006820;GO:0043171;GO:0006750;GO:0044699;GO:1901575;GO:0043043;GO:0071705;GO:0071704;GO:0006751;GO:0006749;GO:0071702;GO:1901566;GO:0019184;GO:0009987;GO:1901576;GO:0015849;GO:0006811;GO:0006810;GO:0015711;GO:0009058;GO:0044765;GO:0008150;GO:0008152;GO:0044271;GO:0051234;GO:0009056;GO:0051179;GO:1902578;GO:0046942;GO:0043604;GO:1901564;GO:…	------	------	------	------	COG3703	P:Inorganic ion transport and metabolism	PF04752.9	ChaC	ChaC-like protein	cytoplasmic	1	10	20.9	High
Q8IZ21	Phosphatase and actin regulator 4 OS=Homo sapiens OX=9606 GN=PHACTR4 PE=1 SV=1	1.26115	0.334743	0.00115	up	yes	1.258	0.9975	BP:regulation of phosphate metabolic process;BP:regulation of primary metabolic process;BP:regulation of metabolic process;BP:regulation of homotypic cell-cell adhesion;BP:regulation of alpha-beta T cell differentiation;BP:regulation of extrathymic T cell differentiation;BP:regulation of alpha-beta T cell activation;BP:regulation of response to stimulus;BP:signal transduction;BP:regulation of sig…	GO:0019220;GO:0080090;GO:0019222;GO:0034110;GO:0046637;GO:0033082;GO:0046634;GO:0048583;GO:0007165;GO:0009966;GO:0061386;GO:1901362;GO:0071840;GO:0032774;GO:0051716;GO:0010605;GO:0010604;GO:0009968;GO:0048869;GO:0010033;GO:0032268;GO:0044093;GO:0044092;GO:0048518;GO:0065007;GO:0048585;GO:0040011;GO:1904627;GO:0060255;GO:0001667;GO:0006952;GO:0034645;GO:2001141;GO:0001755;GO:1903706;GO:0001843;GO:…	K17585	PHACTR4	------	------	------	------	PF02755.12	RPEL	RPEL repeat	cytoplasmic	3	8	78.2	High
P39687	Acidic leucine-rich nuclear phosphoprotein 32 family member A OS=Homo sapiens OX=9606 GN=ANP32A PE=1 SV=1	1.23512	0.30465	0.01312	up	yes	1.245	1.008	BP:nuclear transport;BP:protein localization;BP:regulation of metabolic process;BP:signal transduction;BP:organic cyclic compound biosynthetic process;BP:cellular component organization or biogenesis;BP:regulation of primary metabolic process;BP:macromolecular complex assembly;BP:cellular macromolecule localization;BP:posttranscriptional regulation of gene expression;BP:ATP-dependent chromatin re…	GO:0051169;GO:0008104;GO:0019222;GO:0007165;GO:1901362;GO:0071840;GO:0080090;GO:0065003;GO:0070727;GO:0010608;GO:0043044;GO:0033036;GO:0060255;GO:0045184;GO:2001141;GO:0046483;GO:0006334;GO:0006997;GO:0006807;GO:0035556;GO:0042981;GO:0050789;GO:0097659;GO:1901576;GO:0044260;GO:0006886;GO:0016043;GO:0065007;GO:1901360;GO:0065004;GO:0065008;GO:0018130;GO:0034613;GO:0030474;GO:0006810;GO:0009889;GO:…	K18646	ANP32A_C_D	------	------	------	------	PF14580.3;PF12799.4;PF13855.3;PF13516.3	LRR_9;LRR_4;LRR_8;LRR_6	Leucine-rich repeat;Leucine Rich repeats;Leucine rich repeat;Leucine Rich repeat	cytoplasmic	3	29	28.6	High
G3V325	ATP5MF-PTCD1 readthrough OS=Homo sapiens OX=9606 GN=ATP5MF-PTCD1 PE=4 SV=1	1.29664	0.374774	0.01745	up	yes	1.272	0.981	BP:nucleic acid metabolic process;BP:cellular nitrogen compound metabolic process;BP:nitrogen compound metabolic process;BP:ncRNA metabolic process;BP:ncRNA processing;BP:organic cyclic compound metabolic process;BP:cellular macromolecule metabolic process;BP:tRNA metabolic process;BP:RNA processing;BP:organic substance metabolic process;BP:tRNA 3'-end processing;BP:tRNA processing;BP:nucleobase-…	GO:0090304;GO:0034641;GO:0006807;GO:0034660;GO:0034470;GO:1901360;GO:0044260;GO:0006399;GO:0006396;GO:0071704;GO:0042780;GO:0008033;GO:0006139;GO:0009987;GO:0006725;GO:0031123;GO:0008150;GO:0008152;GO:0043628;GO:0046483;GO:0016070;GO:0044238;GO:0044237;GO:0043170;GO:0031974;GO:0044446;GO:0005759;GO:0043233;GO:0044464;GO:0005575;GO:0070013;GO:0044444;GO:0044429;GO:0044424;GO:0044422;GO:0003674;GO:…	K02130;K17710	ATPeF0F, ATP5J2;PTCD1	hsa00190	Oxidative phosphorylation	------	------	PF13041.3;PF13812.3;PF17177.1;PF01535.17;PF12854.4	PPR_2;PPR_3;PPR_long;PPR;PPR_1	PPR repeat family;Pentatricopeptide repeat domain;Pentacotripeptide-repeat region of PROPR;PPR repeat;PPR repeat	cytoplasmic	4	7	84.1	High
Q9Y3D3	28S ribosomal protein S16, mitochondrial OS=Homo sapiens OX=9606 GN=MRPS16 PE=1 SV=1	1.2297	0.29831	0.01256	up	yes	1.242	1.01	BP:cellular component organization or biogenesis;BP:macromolecular complex assembly;BP:single-organism metabolic process;BP:single-organism biosynthetic process;BP:peptide biosynthetic process;BP:amide biosynthetic process;BP:actin filament polymerization;BP:organonitrogen compound metabolic process;BP:protein metabolic process;BP:cellular component assembly;BP:macromolecule metabolic process;BP:…	GO:0071840;GO:0065003;GO:0044710;GO:0044711;GO:0043043;GO:0043604;GO:0030041;GO:1901564;GO:0019538;GO:0022607;GO:0043170;GO:1901576;GO:0016043;GO:0007005;GO:0032543;GO:0008154;GO:0006950;GO:0008150;GO:0008152;GO:0044271;GO:0050896;GO:0022411;GO:0006518;GO:0044249;GO:0034641;GO:0034645;GO:0043241;GO:1901566;GO:0044699;GO:0044238;GO:0009987;GO:0006979;GO:0051258;GO:0043603;GO:0006807;GO:0030091;GO:…	K02959	RP-S16, MRPS16, rpsP	hsa03010	Ribosome	COG0228	J:Translation, ribosomal structure and biogenesis	PF00886.16	Ribosomal_S16	Ribosomal protein S16	mitochondrial	3	25	15.3	High
H7BYT1	Casein kinase I isoform delta OS=Homo sapiens OX=9606 GN=CSNK1D PE=1 SV=2	1.23758	0.307515	0.007051	up	yes	1.245	1.006	BP:phosphorylation;BP:regulation of biological process;BP:regulation of cell death;BP:regulation of apoptotic process;BP:cellular protein metabolic process;BP:cellular macromolecule metabolic process;BP:regulation of programmed cell death;BP:organic substance metabolic process;BP:negative regulation of apoptotic process;BP:biological regulation;BP:negative regulation of biological process;BP:nega…	GO:0016310;GO:0050789;GO:0010941;GO:0042981;GO:0044267;GO:0044260;GO:0043067;GO:0071704;GO:0043066;GO:0065007;GO:0048519;GO:0043069;GO:0006468;GO:0009987;GO:0060548;GO:0006464;GO:0050794;GO:0043412;GO:0036211;GO:0008150;GO:0008152;GO:0044238;GO:0019538;GO:0044237;GO:0043170;GO:0006796;GO:0006793;GO:0048523;GO:0005615;GO:0005575;GO:0044421;GO:0017076;GO:0004866;GO:0035639;GO:0032549;GO:0030414;GO:…	------	------	------	------	------	------	PF00069.22;PF07714.14	Pkinase;Pkinase_Tyr	Protein kinase domain;Protein tyrosine kinase	cytoplasmic	1	3	49	High
P62136	Serine/threonine-protein phosphatase PP1-alpha catalytic subunit OS=Homo sapiens OX=9606 GN=PPP1CA PE=1 SV=1	1.2326	0.30171	0.002599	up	yes	1.24	1.006	BP:positive regulation of apoptotic signaling pathway;BP:circadian regulation of gene expression;BP:response to abiotic stimulus;BP:regulation of primary metabolic process;BP:regulation of metabolic process;BP:regulation of apoptotic signaling pathway;BP:protein dephosphorylation;BP:positive regulation of response to stimulus;BP:regulation of response to stimulus;BP:regulation of extrinsic apopto…	GO:2001235;GO:0032922;GO:0009628;GO:0080090;GO:0019222;GO:2001233;GO:0006470;GO:0048584;GO:0048583;GO:2001239;GO:0030111;GO:1901360;GO:0044710;GO:0070873;GO:0009649;GO:0071704;GO:0009966;GO:0009967;GO:0071840;GO:0048511;GO:0048513;GO:0006073;GO:0044092;GO:0048518;GO:0006112;GO:0046483;GO:0006281;GO:0060255;GO:2001238;GO:0006446;GO:0042752;GO:0010038;GO:0010035;GO:2001236;GO:0055114;GO:0023056;GO:…	K06269	PPP1C	hsa05205;hsa04611;hsa05034;hsa05168;hsa04022;hsa04750;hsa04114;hsa04931;hsa04720;hsa04910;hsa03015;hsa04390;hsa04024;hsa04510;hsa05031;hsa04728;hsa04810;hsa04261;hsa04921;hsa04270	Proteoglycans in cancer;Platelet activation;Alcoholism;Herpes simplex infection;cGMP-PKG signaling pathway;Inflammatory mediator regulation of TRP channels;Oocyte meiosis;Insulin resistance;Long-term potentiation;Insulin signaling pathway;mRNA surveillance pathway;Hippo signaling pathway;cAMP signaling pathway;Focal adhesion;Amphetamine addiction;Dopaminergic synapse;Regulation of actin cytoskele…	COG0639	T:Signal transduction mechanisms	PF00149.25;PF16891.2	Metallophos;STPPase_N	Calcineurin-like phosphoesterase;Serine-threonine protein phosphatase N-terminal domain	cytoplasmic	2	49	37.5	High
Q6ZXV5	Protein O-mannosyl-transferase TMTC3 OS=Homo sapiens OX=9606 GN=TMTC3 PE=1 SV=2	1.20256	0.266105	0.04513	up	yes	1.223	1.017	BP:positive regulation of catabolic process;BP:regulation of catabolic process;BP:regulation of metabolic process;BP:positive regulation of cellular metabolic process;BP:regulation of cellular metabolic process;BP:regulation of primary metabolic process;BP:positive regulation of metabolic process;BP:cellular response to stimulus;BP:regulation of cellular catabolic process;BP:regulation of protein…	GO:0009896;GO:0009894;GO:0019222;GO:0031325;GO:0031323;GO:0080090;GO:0009893;GO:0051716;GO:0031329;GO:0051246;GO:0051247;GO:0050789;GO:0008150;GO:0060255;GO:0065007;GO:1901800;GO:0048518;GO:0032270;GO:0031331;GO:1903364;GO:0033554;GO:1903362;GO:1903052;GO:0061136;GO:1903050;GO:0009987;GO:0050794;GO:0006950;GO:0030162;GO:0045862;GO:0010604;GO:0032268;GO:0050896;GO:0042176;GO:0045732;GO:0034976;GO:…	------	------	------	------	COG0457	R:General function prediction only	PF13181.3;PF07719.14;PF08409.8;PF00515.25;PF13431.3;PF13414.3;PF13432.3;PF14559.3;PF13174.3	TPR_8;TPR_2;DUF1736;TPR_1;TPR_17;TPR_11;TPR_16;TPR_19;TPR_6	Tetratricopeptide repeat;Tetratricopeptide repeat;Domain of unknown function;Tetratricopeptide repeat;Tetratricopeptide repeat;TPR repeat;Tetratricopeptide repeat;Tetratricopeptide repeat;Tetratricopeptide repeat	ER	6	9	103.9	High
P21953	2-oxoisovalerate dehydrogenase subunit beta, mitochondrial OS=Homo sapiens OX=9606 GN=BCKDHB PE=1 SV=2	1.23031	0.299021	0.00055	up	yes	1.234	1.003	BP:regulation of primary metabolic process;BP:regulation of metabolic process;BP:cell development;BP:myelination in peripheral nervous system;BP:small molecule metabolic process;BP:small molecule catabolic process;BP:single-organism catabolic process;BP:single-organism metabolic process;BP:positive regulation of macromolecule metabolic process;BP:cellular developmental process;BP:epithelial cell …	GO:0080090;GO:0019222;GO:0048468;GO:0022011;GO:0044281;GO:0044282;GO:0044712;GO:0044710;GO:0010604;GO:0048869;GO:0030855;GO:0048518;GO:0030216;GO:0060255;GO:0032787;GO:0008366;GO:2001141;GO:0043436;GO:0046487;GO:0055114;GO:1901565;GO:1901564;GO:0016054;GO:0009893;GO:0021782;GO:0009891;GO:0009063;GO:0010628;GO:0050789;GO:1901575;GO:0042552;GO:0065007;GO:0009889;GO:0009888;GO:0050794;GO:0008150;GO:…	K00167	BCKDHB, bkdA2	hsa00280;hsa00640	Valine, leucine and isoleucine degradation;Propanoate metabolism	COG0022	C:Energy production and conversion	PF02779.21;PF02780.17	Transket_pyr;Transketolase_C	Transketolase, pyrimidine binding domain;Transketolase, C-terminal domain	mitochondrial	3	12	43.1	High
P04179	Superoxide dismutase [Mn], mitochondrial OS=Homo sapiens OX=9606 GN=SOD2 PE=1 SV=3	1.33299	0.41466	0.0183	up	yes	1.275	0.9565	BP:tissue homeostasis;BP:response to zinc ion;BP:response to manganese ion;BP:cellular response to stimulus;BP:double-strand break repair;BP:response to external biotic stimulus;BP:regulation of apoptotic signaling pathway;BP:apoptotic DNA fragmentation;BP:relaxation of smooth muscle;BP:DNA repair;BP:negative regulation of cell death;BP:pigment cell differentiation;BP:regulation of protein kinase…	GO:0001894;GO:0010043;GO:0010042;GO:0051716;GO:0006302;GO:0043207;GO:2001233;GO:0006309;GO:0044557;GO:0006281;GO:0060548;GO:0050931;GO:0045859;GO:0007283;GO:0046483;GO:0042325;GO:0042327;GO:0009607;GO:0006575;GO:0009605;GO:0034284;GO:0009892;GO:0009893;GO:0009890;GO:0009891;GO:0000305;GO:0000303;GO:0000302;GO:0098771;GO:0071902;GO:0035556;GO:0071900;GO:0050789;GO:0042554;GO:0051347;GO:0001817;GO:…	K04564	SOD2	hsa04211;hsa04213;hsa05016;hsa04068;hsa04146	Longevity regulating pathway;Longevity regulating pathway - multiple species;Huntington's disease;FoxO signaling pathway;Peroxisome	COG0605	P:Inorganic ion transport and metabolism	PF02777.15;PF00081.19	Sod_Fe_C;Sod_Fe_N	Iron/manganese superoxide dismutases, C-terminal domain;Iron/manganese superoxide dismutases, alpha-hairpin domain	mitochondrial	8	39	24.7	High
O95881	Thioredoxin domain-containing protein 12 OS=Homo sapiens OX=9606 GN=TXNDC12 PE=1 SV=1	1.25645	0.329352	0.005513	up	yes	1.242	0.9885	BP:negative regulation of apoptotic signaling pathway;BP:regulation of apoptotic signaling pathway;BP:negative regulation of response to stimulus;BP:cell differentiation;BP:regulation of endoplasmic reticulum stress-induced intrinsic apoptotic signaling pathway;BP:negative regulation of endoplasmic reticulum stress-induced intrinsic apoptotic signaling pathway;BP:homeostatic process;BP:negative r…	GO:2001234;GO:2001233;GO:0048585;GO:0030154;GO:1902235;GO:1902236;GO:0042592;GO:0023057;GO:0010648;GO:0023051;GO:1903573;GO:0010646;GO:0042981;GO:0050789;GO:0044699;GO:0044710;GO:0010941;GO:0009968;GO:0009966;GO:0048869;GO:0043067;GO:0043066;GO:0065007;GO:0060548;GO:0019725;GO:0048519;GO:0065008;GO:0043069;GO:2001243;GO:2001242;GO:0032502;GO:0048583;GO:0009987;GO:0050794;GO:0044767;GO:0008150;GO:…	K05360	TXNDC12	hsa00480	Glutathione metabolism	------	------	PF13899.3	Thioredoxin_7	Thioredoxin-like	ER	4	27	19.2	High
P62805	Histone H4 OS=Homo sapiens OX=9606 GN=H4C1 PE=1 SV=2	1.2669	0.341307	0.03591	up	yes	1.246	0.9835	BP:regulation of primary metabolic process;BP:regulation of metabolic process;BP:anatomical structure homeostasis;BP:ossification;BP:chromatin remodeling at centromere;BP:cellular component organization or biogenesis;BP:RNA biosynthetic process;BP:single-organism metabolic process;BP:negative regulation of macromolecule metabolic process;BP:double-strand break repair;BP:cellular developmental pro…	GO:0080090;GO:0019222;GO:0060249;GO:0001503;GO:0031055;GO:0071840;GO:0032774;GO:0044710;GO:0010605;GO:0006302;GO:0048869;GO:0043044;GO:0040029;GO:0016458;GO:0048518;GO:0048519;GO:0002683;GO:0051259;GO:0034723;GO:0006281;GO:0060255;GO:0051291;GO:0051290;GO:0060147;GO:2001141;GO:1903706;GO:1903707;GO:0046483;GO:0044707;GO:0019538;GO:0045652;GO:0045653;GO:0033554;GO:0019438;GO:0006334;GO:0022607;GO:…	K11254	H4	hsa05322;hsa05203;hsa05034	Systemic lupus erythematosus;Viral carcinogenesis;Alcoholism	COG2036	B:Chromatin structure and dynamics	PF15511.3	CENP-T_C	Centromere kinetochore component CENP-T histone fold	cytoplasmic	13	66	11.4	High
P02751	Fibronectin OS=Homo sapiens OX=9606 GN=FN1 PE=1 SV=5	1.25633	0.329218	0.0321	up	yes	1.24	0.987	BP:regulation of secretion;BP:negative regulation of secretion;BP:regulation of transport;BP:cellular response to stimulus;BP:response to external biotic stimulus;BP:cell junction assembly;BP:response to prostaglandin;BP:response to prostaglandin E;BP:negative regulation of cell death;BP:regulation of cell shape;BP:regulation of epithelial cell proliferation;BP:positive regulation of epithelial c…	GO:0051046;GO:0051048;GO:0051049;GO:0051716;GO:0043207;GO:0034329;GO:0034694;GO:0034695;GO:0060548;GO:0008360;GO:0050678;GO:0050679;GO:0042325;GO:0009607;GO:0009605;GO:0034284;GO:0019538;GO:0018149;GO:0009893;GO:0000302;GO:1901342;GO:0051223;GO:0051224;GO:0050789;GO:0000904;GO:0000902;GO:0051345;GO:0071560;GO:0006887;GO:0070201;GO:0098602;GO:0043412;GO:0002526;GO:0050710;GO:0071345;GO:0071347;GO:…	------	------	------	------	------	------	PF00041.18;PF00039.15;PF16656.2;PF00040.16	fn3;fn1;Pur_ac_phosph_N;fn2	Fibronectin type III domain;Fibronectin type I domain;Purple acid Phosphatase, N-terminal domain;Fibronectin type II domain	plasma membrane	18	11	272.2	High
I3L0E3	HCG1984214, isoform CRA_a OS=Homo sapiens OX=9606 GN=hCG_1984214 PE=4 SV=1	1.26911	0.343821	0.007519	up	yes	1.245	0.981	BP:regulation of primary metabolic process;BP:regulation of metabolic process;BP:cellular component organization or biogenesis;BP:single-organism metabolic process;BP:single-organism biosynthetic process;BP:peptide biosynthetic process;BP:regulation of macromolecule metabolic process;BP:regulation of RNA biosynthetic process;BP:organonitrogen compound metabolic process;BP:organonitrogen compound …	GO:0080090;GO:0019222;GO:0071840;GO:0044710;GO:0044711;GO:0043043;GO:0060255;GO:2001141;GO:1901564;GO:1901566;GO:0019538;GO:0043170;GO:0050789;GO:1901576;GO:0044260;GO:0016043;GO:0065007;GO:0007005;GO:0032543;GO:0009889;GO:0050794;GO:0008150;GO:0008152;GO:0044271;GO:0006355;GO:0010556;GO:0022411;GO:0006518;GO:0044249;GO:0034641;GO:0034645;GO:0043241;GO:0044699;GO:0009987;GO:1903506;GO:0043604;GO:…	K02961	RP-S17, MRPS17, rpsQ	hsa03010	Ribosome	------	------	PF01352.24;PF00366.17	KRAB;Ribosomal_S17	KRAB box;Ribosomal protein S17	cytoplasmic	3	18	25.7	High
P06576	ATP synthase subunit beta, mitochondrial OS=Homo sapiens OX=9606 GN=ATP5F1B PE=1 SV=3	1.26837	0.342973	0.04751	up	yes	1.243	0.98	BP:organonitrogen compound biosynthetic process;BP:ribonucleoside monophosphate biosynthetic process;BP:membrane organization;BP:negative regulation of cell adhesion;BP:nucleotide biosynthetic process;BP:small molecule metabolic process;BP:ribonucleoside monophosphate metabolic process;BP:inorganic ion homeostasis;BP:inner mitochondrial membrane organization;BP:mitochondrial membrane organization…	GO:1901566;GO:0009156;GO:0061024;GO:0007162;GO:0009165;GO:0044281;GO:0009161;GO:0098771;GO:0007007;GO:0007006;GO:0007005;GO:0044710;GO:0044711;GO:0048869;GO:1990542;GO:0009199;GO:0048522;GO:0048518;GO:0048519;GO:0051704;GO:0030155;GO:0098662;GO:0019725;GO:0009206;GO:0009205;GO:0006933;GO:0009167;GO:0009201;GO:0046034;GO:0043536;GO:0043535;GO:0006839;GO:1901564;GO:0046129;GO:0046128;GO:0042455;GO:…	K02133	ATPeF1B, ATP5B, ATP2	hsa05016;hsa05010;hsa05012;hsa00190	Huntington's disease;Alzheimer's disease;Parkinson's disease;Oxidative phosphorylation	COG0055	C:Energy production and conversion	PF00006.22;PF02874.20	ATP-synt_ab;ATP-synt_ab_N	ATP synthase alpha/beta family, nucleotide-binding domain;ATP synthase alpha/beta family, beta-barrel domain	mitochondrial	20	72	56.5	High
P09486	SPARC OS=Homo sapiens OX=9606 GN=SPARC PE=1 SV=1	1.24343	0.31433	0.001763	up	yes	1.231	0.99	BP:response to abiotic stimulus;BP:negative regulation of epithelial cell proliferation;BP:ossification;BP:signal transduction;BP:cellular component organization or biogenesis;BP:cellular response to stimulus;BP:response to external biotic stimulus;BP:response to wounding;BP:animal organ development;BP:positive regulation of biological process;BP:negative regulation of biological process;BP:regul…	GO:0009628;GO:0050680;GO:0001503;GO:0007165;GO:0071840;GO:0051716;GO:0043207;GO:0009611;GO:0048513;GO:0048518;GO:0048519;GO:0042127;GO:0031960;GO:0051592;GO:0051591;GO:0010038;GO:0050678;GO:0043434;GO:0010035;GO:0010033;GO:0010634;GO:0009607;GO:0016192;GO:0044707;GO:0010243;GO:0034284;GO:0031667;GO:0046683;GO:0030198;GO:0022604;GO:0022603;GO:1901343;GO:0032496;GO:0006887;GO:0016043;GO:0045055;GO:…	------	------	------	------	------	------	PF10591.6;PF00050.18;PF07648.12;PF09289.7	SPARC_Ca_bdg;Kazal_1;Kazal_2;FOLN	Secreted protein acidic and rich in cysteine Ca binding region;Kazal-type serine protease inhibitor domain;Kazal-type serine protease inhibitor domain;Follistatin/Osteonectin-like EGF domain	extracellular	3	19	34.6	High
Q6P1Q0	LETM1 domain-containing protein 1 OS=Homo sapiens OX=9606 GN=LETMD1 PE=1 SV=1	1.22061	0.287603	0.003218	up	yes	1.22	0.9995	BP:inorganic ion homeostasis;BP:organic cyclic compound metabolic process;BP:organic cyclic compound catabolic process;BP:DNA catabolic process;BP:cellular homeostasis;BP:heterocycle metabolic process;BP:regulation of biological quality;BP:chemical homeostasis;BP:aromatic compound catabolic process;BP:nitrogen compound metabolic process;BP:organic substance catabolic process;BP:cellular macromole…	GO:0098771;GO:1901360;GO:1901361;GO:0006308;GO:0019725;GO:0046483;GO:0065008;GO:0048878;GO:0019439;GO:0006807;GO:1901575;GO:0044265;GO:0044260;GO:0065007;GO:0006139;GO:0046700;GO:0008150;GO:0008152;GO:0034655;GO:0044270;GO:0050801;GO:0044248;GO:0034641;GO:0044699;GO:0006875;GO:0009987;GO:0006725;GO:0006873;GO:0030003;GO:0055080;GO:0055082;GO:0090304;GO:0043170;GO:0042592;GO:0071704;GO:0044763;GO:…	------	------	------	------	------	------	PF07766.10	LETM1	LETM1-like protein	mitochondrial	2	7	41.8	High
A0A0A0MRJ7	Coagulation factor V OS=Homo sapiens OX=9606 GN=F5 PE=1 SV=1	1.22306	0.290492	0.006225	up	yes	1.22	0.9975	BP:vesicle coating;BP:circulatory system process;BP:cellular component organization or biogenesis;BP:platelet activation;BP:system process;BP:vesicle organization;BP:cellular component assembly;BP:secretion by cell;BP:exocytosis;BP:cellular component organization;BP:regulated exocytosis;BP:macromolecular complex assembly;BP:blood circulation;BP:transport;BP:cell activation;BP:biological_process;B…	GO:0006901;GO:0003013;GO:0071840;GO:0030168;GO:0003008;GO:0016050;GO:0022607;GO:0032940;GO:0006887;GO:0016043;GO:0045055;GO:0065003;GO:0008015;GO:0006810;GO:0001775;GO:0008150;GO:0051234;GO:0046903;GO:0044699;GO:0032501;GO:0009987;GO:0048208;GO:0043933;GO:0071822;GO:0002576;GO:0006461;GO:0044765;GO:0044763;GO:0051179;GO:1902578;GO:0006996;GO:0016192;GO:0031974;GO:0044433;GO:0031983;GO:0031982;GO:…	K03902	F5	hsa04610	Complement and coagulation cascades	------	------	PF00754.22;PF07732.12	F5_F8_type_C;Cu-oxidase_3	F5/8 type C domain;Multicopper oxidase	cytoplasmic	10	6	252.1	High
O75151	Lysine-specific demethylase PHF2 OS=Homo sapiens OX=9606 GN=PHF2 PE=1 SV=4	1.34322	0.425696	0.04412	up	yes	1.268	0.944	BP:negative regulation of chromatin silencing;BP:regulation of primary metabolic process;BP:regulation of metabolic process;BP:regulation of mRNA processing;BP:histone monoubiquitination;BP:negative regulation of organelle organization;BP:regulation of chromatin silencing;BP:regulation of mRNA polyadenylation;BP:regulation of histone modification;BP:positive regulation of histone modification;BP:…	GO:0031936;GO:0080090;GO:0019222;GO:0050684;GO:0010390;GO:0010639;GO:0031935;GO:1900363;GO:0031056;GO:0031058;GO:1901362;GO:0071840;GO:0044710;GO:0033523;GO:0010604;GO:0040029;GO:0071704;GO:0070647;GO:0010033;GO:0032446;GO:0048513;GO:0048518;GO:0048519;GO:0033184;GO:0050686;GO:0060255;GO:1901800;GO:0030162;GO:0051129;GO:2001141;GO:0043434;GO:0055114;GO:0046483;GO:0070988;GO:0019538;GO:0010243;GO:…	K19414	PHF2, JHDM1E	------	------	------	------	PF02373.19;PF00628.26;PF13621.3	JmjC;PHD;Cupin_8	JmjC domain, hydroxylase;PHD-finger;Cupin-like domain	nuclear	1	2	120.7	High
P04004	Vitronectin OS=Homo sapiens OX=9606 GN=VTN PE=1 SV=1	1.23949	0.309751	0.003128	up	yes	1.224	0.9875	BP:primary metabolic process;BP:regulation of phosphate metabolic process;BP:regulation of primary metabolic process;BP:regulation of metabolic process;BP:regulation of transport;BP:negative regulation of response to stimulus;BP:positive regulation of response to stimulus;BP:regulation of response to stimulus;BP:cell-matrix adhesion;BP:regulation of lymphocyte mediated immunity;BP:negative regula…	GO:0044238;GO:0019220;GO:0080090;GO:0019222;GO:0051049;GO:0048585;GO:0048584;GO:0048583;GO:0007160;GO:0002706;GO:0050819;GO:0002704;GO:0002703;GO:0016043;GO:0048260;GO:0031347;GO:0044710;GO:0010605;GO:0061302;GO:0045785;GO:0009966;GO:0009967;GO:0071840;GO:0050727;GO:0048513;GO:0044093;GO:0044092;GO:0048518;GO:0065007;GO:0034622;GO:0016192;GO:0010604;GO:2000258;GO:0031589;GO:0051050;GO:0060255;GO:…	K06251	VTN	hsa05205;hsa04512;hsa04610;hsa04510;hsa04151	Proteoglycans in cancer;ECM-receptor interaction;Complement and coagulation cascades;Focal adhesion;PI3K-Akt signaling pathway	------	------	PF00045.16;PF01033.14	Hemopexin;Somatomedin_B	Hemopexin;Somatomedin B domain	ER	3	10	54.3	High
Q92759	General transcription factor IIH subunit 4 OS=Homo sapiens OX=9606 GN=GTF2H4 PE=1 SV=1	1.26591	0.340179	0.01275	up	yes	1.233	0.974	BP:regulation of primary metabolic process;BP:regulation of metabolic process;BP:7-methylguanosine RNA capping;BP:male gonad development;BP:organic cyclic compound biosynthetic process;BP:organic cyclic compound metabolic process;BP:transcription initiation from RNA polymerase I promoter;BP:single-organism metabolic process;BP:negative regulation of macromolecule metabolic process;BP:positive reg…	GO:0080090;GO:0019222;GO:0009452;GO:0008584;GO:1901362;GO:1901360;GO:0006361;GO:0044710;GO:0010605;GO:0010604;GO:0051254;GO:0040029;GO:0048513;GO:0048518;GO:0048519;GO:0042127;GO:0032392;GO:0006281;GO:0060255;GO:0006366;GO:0006289;GO:0003006;GO:0071103;GO:2001141;GO:0046483;GO:0044702;GO:0019538;GO:0006370;GO:0010557;GO:0033554;GO:0019438;GO:0006295;GO:0006294;GO:0022607;GO:0009892;GO:0009893;GO:…	K03144	TFIIH4, GTF2H4, TFB2	hsa03022;hsa05203;hsa03420	Basal transcription factors;Viral carcinogenesis;Nucleotide excision repair	COG5144	K:Transcription	PF03849.11;PF13625.3	Tfb2;Helicase_C_3	Transcription factor Tfb2;Helicase conserved C-terminal domain	cytoplasmic	1	3	52.2	High
Q9NZR1	Tropomodulin-2 OS=Homo sapiens OX=9606 GN=TMOD2 PE=1 SV=1	1.27761	0.353443	0.01849	up	yes	1.238	0.969	BP:positive regulation of response to stimulus;BP:behavior;BP:learning or memory;BP:regulation of actin polymerization or depolymerization;BP:muscle system process;BP:cellular component organization or biogenesis;BP:regulation of signal transduction;BP:positive regulation of signal transduction;BP:negative regulation of cytoskeleton organization;BP:regulation of cytoskeleton organization;BP:posit…	GO:0048584;GO:0007610;GO:0007611;GO:0008064;GO:0003012;GO:0071840;GO:0009966;GO:0009967;GO:0051494;GO:0051493;GO:0048518;GO:0048519;GO:0006936;GO:0048583;GO:1901880;GO:0003008;GO:0044700;GO:0044707;GO:0044708;GO:0008277;GO:0098916;GO:0031333;GO:0022607;GO:1901879;GO:0010639;GO:0016043;GO:0090066;GO:0065007;GO:0065008;GO:0048646;GO:0050794;GO:0051128;GO:0008150;GO:0048731;GO:0043254;GO:0050890;GO:…	K10370	TMOD	------	------	------	------	PF03250.11	Tropomodulin	Tropomodulin	cytoplasmic	1	2	39.6	High
Q8IUE6	Histone H2A type 2-B OS=Homo sapiens OX=9606 GN=HIST2H2AB PE=1 SV=3	1.23732	0.307222	0.01842	up	yes	1.22	0.986	BP:regulation of primary metabolic process;BP:regulation of metabolic process;BP:organic cyclic compound biosynthetic process;BP:cellular component organization or biogenesis;BP:negative regulation of macromolecule metabolic process;BP:regulation of gene expression, epigenetic;BP:gene silencing;BP:negative regulation of biological process;BP:regulation of macromolecule metabolic process;BP:regula…	GO:0080090;GO:0019222;GO:1901362;GO:0071840;GO:0010605;GO:0040029;GO:0016458;GO:0048519;GO:0060255;GO:2001141;GO:0046483;GO:0019438;GO:0009892;GO:0009890;GO:0010629;GO:0006807;GO:0097659;GO:1901576;GO:0044260;GO:0016043;GO:0065007;GO:1901360;GO:0018130;GO:0009889;GO:0050794;GO:0008150;GO:0008152;GO:0034654;GO:0016070;GO:0044271;GO:0006355;GO:0010556;GO:0006351;GO:0010558;GO:0032774;GO:0044249;GO:…	K11251	H2A	hsa05322;hsa05034	Systemic lupus erythematosus;Alcoholism	COG5262	B:Chromatin structure and dynamics	PF16211.2;PF00125.21	Histone_H2A_C;Histone	C-terminus of histone H2A;Core histone H2A/H2B/H3/H4	nuclear	2	42	14	High
O43653	Prostate stem cell antigen OS=Homo sapiens OX=9606 GN=PSCA PE=1 SV=2	1.3054	0.384487	0.02389	up	yes	1.246	0.9545	BP:negative regulation of phosphorus metabolic process;BP:regulation of phosphate metabolic process;BP:regulation of primary metabolic process;BP:regulation of metabolic process;BP:negative regulation of response to stimulus;BP:negative regulation of cellular metabolic process;BP:modulation of synaptic transmission;BP:negative regulation of signaling;BP:regulation of signaling;BP:negative regulat…	GO:0010563;GO:0019220;GO:0080090;GO:0019222;GO:0048585;GO:0031324;GO:0050804;GO:0023057;GO:0023051;GO:0009892;GO:0010646;GO:0051248;GO:1902531;GO:0010605;GO:0009968;GO:0009966;GO:0051246;GO:0050789;GO:0099601;GO:0065007;GO:0043409;GO:0031399;GO:0048519;GO:0065009;GO:0043408;GO:0010469;GO:0045936;GO:0060255;GO:0031323;GO:0048583;GO:0050794;GO:0051174;GO:0032268;GO:0008150;GO:1902532;GO:0001933;GO:…	------	------	------	------	------	------	PF00021.18;PF00087.18	UPAR_LY6;Toxin_1	u-PAR/Ly-6 domain;Snake toxin	extracellular	3	46	12	High
F8VVM2	Phosphate carrier protein, mitochondrial OS=Homo sapiens OX=9606 GN=SLC25A3 PE=1 SV=1	1.21774	0.284208	0.02937	up	yes	1.208	0.992	BP:cellular process;BP:biological_process;BP:metabolic process;BP:cellular metabolic process;BP:translational initiation;CC:intracellular organelle;CC:membrane-bounded organelle;CC:organelle;CC:intrinsic component of membrane;CC:integral component of membrane;CC:membrane;CC:mitochondrion;CC:intracellular membrane-bounded organelle;CC:cell part;CC:cellular_component;CC:cytoplasmic part;CC:intracel…	GO:0009987;GO:0008150;GO:0008152;GO:0044237;GO:0006413;GO:0043229;GO:0043227;GO:0043226;GO:0031224;GO:0016021;GO:0016020;GO:0005739;GO:0043231;GO:0044464;GO:0005575;GO:0044444;GO:0044424;GO:0044425;GO:0003674;GO:0005488;GO:0003676;GO:1901363;GO:0008135;GO:0097159;GO:0003723;GO:0003743	------	------	------	------	------	------	PF00153.24	Mito_carr	Mitochondrial carrier protein	mitochondrial	1	50	36.1	High
O15145	Actin-related protein 2/3 complex subunit 3 OS=Homo sapiens OX=9606 GN=ARPC3 PE=1 SV=3	1.23766	0.307614	0.0104	up	yes	1.216	0.9825	BP:positive regulation of response to stimulus;BP:regulation of response to stimulus;BP:regulation of actin polymerization or depolymerization;BP:membrane organization;BP:regulation of cell projection assembly;BP:signal transduction;BP:cell surface receptor signaling pathway;BP:enzyme linked receptor protein signaling pathway;BP:transmembrane receptor protein tyrosine kinase signaling pathway;BP:…	GO:0048584;GO:0048583;GO:0008064;GO:0061024;GO:0060491;GO:0007165;GO:0007166;GO:0007167;GO:0007169;GO:0031344;GO:0071840;GO:0065003;GO:0051716;GO:0045785;GO:0051495;GO:0051493;GO:0070848;GO:0010720;GO:0048518;GO:0002682;GO:0030041;GO:0010033;GO:0002429;GO:0048870;GO:0010638;GO:0002376;GO:0032535;GO:0022604;GO:0022607;GO:0022603;GO:0070358;GO:0006928;GO:0050789;GO:0002764;GO:0002431;GO:0002768;GO:…	K05756	ARPC3	hsa05132;hsa05131;hsa05130;hsa05100;hsa04144;hsa04666;hsa04810	Salmonella infection;Shigellosis;Pathogenic Escherichia coli infection;Bacterial invasion of epithelial cells;Endocytosis;Fc gamma R-mediated phagocytosis;Regulation of actin cytoskeleton	------	------	PF04062.11	P21-Arc	ARP2/3 complex ARPC3	cytoplasmic	4	21	20.5	High
O14656	Torsin-1A OS=Homo sapiens OX=9606 GN=TOR1A PE=1 SV=1	1.202	0.265443	0.002142	up	yes	1.199	0.9975	BP:modulation of synaptic transmission;BP:protein localization;BP:positive regulation of intracellular transport;BP:regulation of metabolic process;BP:regulation of synaptic vesicle endocytosis;BP:regulation of intracellular transport;BP:membrane organization;BP:signal transduction;BP:cell surface receptor signaling pathway;BP:enzyme linked receptor protein signaling pathway;BP:transmembrane rece…	GO:0050804;GO:0008104;GO:0032388;GO:0019222;GO:1900242;GO:0032386;GO:0061024;GO:0007165;GO:0007166;GO:0007167;GO:0007169;GO:0051656;GO:0030100;GO:0051650;GO:0071840;GO:0080090;GO:0044710;GO:0070727;GO:0006998;GO:0070647;GO:0070646;GO:0071704;GO:0051049;GO:0048518;GO:0097479;GO:0033036;GO:0051085;GO:0051050;GO:0032225;GO:0045184;GO:0048260;GO:0097480;GO:1903827;GO:0043161;GO:0016192;GO:0048870;GO:…	------	------	------	------	------	------	PF06309.8	Torsin	Torsin	ER	10	41	37.8	High
P30101	Protein disulfide-isomerase A3 OS=Homo sapiens OX=9606 GN=PDIA3 PE=1 SV=4	1.21396	0.279722	0.03566	up	yes	1.2	0.9885	BP:positive regulation of apoptotic signaling pathway;BP:regulation of extrinsic apoptotic signaling pathway;BP:protein localization;BP:regulation of apoptotic signaling pathway;BP:positive regulation of response to stimulus;BP:positive regulation of extrinsic apoptotic signaling pathway;BP:small molecule metabolic process;BP:small molecule biosynthetic process;BP:maintenance of location in cell;…	GO:2001235;GO:2001236;GO:0008104;GO:2001233;GO:0048584;GO:2001238;GO:0044281;GO:0044283;GO:0051651;GO:0042445;GO:0044710;GO:0006066;GO:0070727;GO:0009966;GO:0009967;GO:0048513;GO:0048518;GO:0019725;GO:0032341;GO:0048583;GO:0006606;GO:0045184;GO:0045185;GO:0043434;GO:0010033;GO:0055114;GO:0006081;GO:0065008;GO:0010243;GO:0046165;GO:0002376;GO:0019538;GO:0033554;GO:0051716;GO:0006457;GO:0006950;GO:…	K08056	PDIA3, GRP58	hsa04141;hsa04612	Protein processing in endoplasmic reticulum;Antigen processing and presentation	COG0526	O:Posttranslational modification, protein turnover, chaperones	PF00085.17;PF13848.3;PF13098.3;PF13905.3;PF13899.3	Thioredoxin;Thioredoxin_6;Thioredoxin_2;Thioredoxin_8;Thioredoxin_7	Thioredoxin;Thioredoxin-like domain;Thioredoxin-like domain;Thioredoxin-like;Thioredoxin-like	ER	25	63	56.7	High
P12236	ADP/ATP translocase 3 OS=Homo sapiens OX=9606 GN=SLC25A6 PE=1 SV=4	1.24859	0.320294	0.04273	up	yes	1.213	0.9715	BP:regulation of peptide transport;BP:protein localization;BP:modulation by symbiont of host immune response;BP:modulation by organism of immune response of other organism involved in symbiotic interaction;BP:regulation of secretion;BP:regulation of transport;BP:positive regulation of response to stimulus;BP:regulation of response to stimulus;BP:positive regulation of defense response;BP:membrane…	GO:0090087;GO:0008104;GO:0052553;GO:0052552;GO:0051046;GO:0051049;GO:0048584;GO:0048583;GO:0031349;GO:0061024;GO:0006820;GO:0046732;GO:0046730;GO:0052200;GO:0007006;GO:0007005;GO:0075136;GO:0000002;GO:0043207;GO:0070727;GO:0043043;GO:0044419;GO:0051817;GO:0048518;GO:0065007;GO:0033036;GO:0044416;GO:0060544;GO:0060547;GO:0060546;GO:0060548;GO:0015711;GO:0006605;GO:0045184;GO:0090276;GO:0072655;GO:…	K05863	SLC25A4S, ANT	hsa04022;hsa04020;hsa05166;hsa05016;hsa05012	cGMP-PKG signaling pathway;Calcium signaling pathway;HTLV-I infection;Huntington's disease;Parkinson's disease	------	------	PF00153.24	Mito_carr	Mitochondrial carrier protein	cytoplasmic	3	61	32.8	High
P07099	Epoxide hydrolase 1 OS=Homo sapiens OX=9606 GN=EPHX1 PE=1 SV=1	1.2128	0.27834	0.01342	up	yes	1.194	0.9845	BP:acylglycerol metabolic process;BP:neutral lipid metabolic process;BP:carboxylic acid metabolic process;BP:cellular catabolic process;BP:xenobiotic metabolic process;BP:dicarboxylic acid metabolic process;BP:response to organic cyclic compound;BP:single-organism catabolic process;BP:organic substance catabolic process;BP:organic substance metabolic process;BP:response to toxic substance;BP:lipi…	GO:0006639;GO:0006638;GO:0019752;GO:0044248;GO:0006805;GO:0043648;GO:0014070;GO:0044712;GO:1901575;GO:0071704;GO:0009636;GO:0016042;GO:0018904;GO:0046483;GO:0044255;GO:0006629;GO:0006641;GO:0019439;GO:0009987;GO:0006725;GO:0044710;GO:0008150;GO:0008152;GO:0043436;GO:0042221;GO:0046486;GO:0009056;GO:0010033;GO:0044238;GO:0044699;GO:0006082;GO:0097176;GO:0050896;GO:0044237;GO:0006108;GO:0044763;GO:…	K01253	EPHX1	hsa00980;hsa04976;hsa05204	Metabolism of xenobiotics by cytochrome P450;Bile secretion;Chemical carcinogenesis	COG0596	R:General function prediction only	PF06441.9;PF00561.17	EHN;Abhydrolase_1	Epoxide hydrolase N terminus;alpha/beta hydrolase fold	ER	16	49	52.9	High
P67812	Signal peptidase complex catalytic subunit SEC11A OS=Homo sapiens OX=9606 GN=SEC11A PE=1 SV=1	1.22462	0.292329	0.03036	up	yes	1.194	0.975	BP:metabolic process;BP:nitrogen compound metabolic process;BP:protein maturation;BP:cellular macromolecule metabolic process;BP:organic substance metabolic process;BP:proteolysis;BP:cellular protein metabolic process;BP:cellular process;BP:signal peptide processing;BP:biological_process;BP:protein processing;BP:organonitrogen compound metabolic process;BP:primary metabolic process;BP:cellular am…	GO:0008152;GO:0006807;GO:0051604;GO:0044260;GO:0071704;GO:0006508;GO:0044267;GO:0009987;GO:0006465;GO:0008150;GO:0016485;GO:1901564;GO:0044238;GO:0043603;GO:0019538;GO:0034641;GO:0044237;GO:0043170;GO:0006518;GO:0005787;GO:0005789;GO:0043229;GO:0043227;GO:0043226;GO:0031224;GO:0044446;GO:0031090;GO:0016021;GO:0016020;GO:0044432;GO:1902494;GO:0098588;GO:0031982;GO:1990234;GO:1903561;GO:0070062;GO:…	K13280	SEC11, sipW	hsa03060	Protein export	COG0681	U:Intracellular trafficking, secretion, and vesicular transport	PF00717.20	Peptidase_S24	Peptidase S24-like	cytoplasmic	5	21	20.6	High
Q5HYI7	Metaxin-3 OS=Homo sapiens OX=9606 GN=MTX3 PE=1 SV=2	1.20203	0.265473	0.02725	up	yes	1.184	0.985	BP:protein localization;BP:establishment of localization in cell;BP:single-organism process;BP:cellular macromolecule localization;BP:intracellular protein transport;BP:organic substance transport;BP:macromolecule localization;BP:cellular protein localization;BP:establishment of protein localization to organelle;BP:protein targeting to mitochondrion;BP:transport;BP:protein targeting;BP:establishm…	GO:0008104;GO:0051649;GO:0044699;GO:0070727;GO:0006886;GO:0071702;GO:0033036;GO:0034613;GO:0072594;GO:0006626;GO:0006810;GO:0006605;GO:0045184;GO:0033365;GO:0044765;GO:0008150;GO:0072655;GO:0006839;GO:0051234;GO:0051179;GO:1902578;GO:0051641;GO:0070585;GO:0046907;GO:0015031;GO:1902582;GO:1902580;GO:0031968;GO:0019867;GO:0043229;GO:0044424;GO:0043227;GO:0043226;GO:0044446;GO:0031090;GO:0016020;GO:…	K17776	MTX	------	------	------	------	PF10568.6;PF17171.1;PF17172.1;PF13410.3	Tom37;GST_C_6;GST_N_4;GST_C_2	Outer mitochondrial membrane transport complex protein;Glutathione S-transferase, C-terminal domain;Glutathione S-transferase N-terminal domain;Glutathione S-transferase, C-terminal domain	peroxisomal	2	9	35.1	High
Q9H1I8	Activating signal cointegrator 1 complex subunit 2 OS=Homo sapiens OX=9606 GN=ASCC2 PE=1 SV=3	1.23721	0.30709	0.02727	up	yes	1.197	0.9675	BP:regulation of nucleobase-containing compound metabolic process;BP:regulation of primary metabolic process;BP:regulation of metabolic process;BP:DNA dealkylation;BP:regulation of cellular biosynthetic process;BP:regulation of cellular metabolic process;BP:nucleic acid metabolic process;BP:regulation of biological process;BP:cellular nitrogen compound metabolic process;BP:nitrogen compound metab…	GO:0019219;GO:0080090;GO:0019222;GO:0035510;GO:0031326;GO:0031323;GO:0090304;GO:0050789;GO:0034641;GO:0006807;GO:0034645;GO:0009058;GO:1901360;GO:0032774;GO:0006307;GO:0006139;GO:0006304;GO:0044260;GO:1901362;GO:2000112;GO:0071704;GO:0065007;GO:0097659;GO:0010468;GO:0018130;GO:1901576;GO:0060255;GO:0009889;GO:0009987;GO:0006725;GO:1903506;GO:0050794;GO:0043412;GO:0009059;GO:0008150;GO:0051171;GO:…	K18667	ASCC2	------	------	------	------	PF02845.13	CUE	CUE domain	cytoplasmic	2	6	86.3	High
P21912	Succinate dehydrogenase [ubiquinone] iron-sulfur subunit, mitochondrial OS=Homo sapiens OX=9606 GN=SDHB PE=1 SV=3	1.21454	0.280412	0.01584	up	yes	1.186	0.9765	BP:small molecule metabolic process;BP:tricarboxylic acid metabolic process;BP:single-organism metabolic process;BP:electron transport chain;BP:respiratory electron transport chain;BP:oxoacid metabolic process;BP:oxidation-reduction process;BP:dicarboxylic acid metabolic process;BP:aerobic respiration;BP:cellular respiration;BP:metabolic process;BP:citrate metabolic process;BP:biological_process;…	GO:0044281;GO:0072350;GO:0044710;GO:0022900;GO:0022904;GO:0043436;GO:0055114;GO:0043648;GO:0009060;GO:0045333;GO:0008152;GO:0006101;GO:0008150;GO:0044699;GO:0044238;GO:0009987;GO:0015980;GO:0006082;GO:0006121;GO:0019752;GO:0006099;GO:0006091;GO:0006105;GO:0071704;GO:0044763;GO:0044237;GO:0045283;GO:0031982;GO:0016020;GO:1902494;GO:0031966;GO:0043234;GO:0045257;GO:0043230;GO:0043231;GO:0044428;GO:…	K00235	SDHB, SDH2	hsa00190;hsa00020;hsa01200;hsa05012;hsa05016;hsa05010;hsa04932	Oxidative phosphorylation;Citrate cycl;Carbon metabolism;Parkinson's disease;Huntington's disease;Alzheimer's disease;Non-alcoholic fatty liver diseas	COG0479	C:Energy production and conversion	PF13085.3;PF13534.3;PF13183.3;PF13237.3	Fer2_3;Fer4_17;Fer4_8;Fer4_10	2Fe-2S iron-sulfur cluster binding domain;4Fe-4S dicluster domain;4Fe-4S dicluster domain;4Fe-4S dicluster domain	mitochondrial	6	24	31.6	High
Q9NVK5	FGFR1 oncogene partner 2 OS=Homo sapiens OX=9606 GN=FGFR1OP2 PE=1 SV=1	1.24974	0.321625	0.04038	up	yes	1.191	0.953	BP:regulation of nucleobase-containing compound metabolic process;BP:regulation of primary metabolic process;BP:regulation of metabolic process;BP:phosphorylation;BP:regulation of cellular metabolic process;BP:peptidyl-tyrosine phosphorylation;BP:regulation of biological process;BP:cellular protein metabolic process;BP:cellular macromolecule metabolic process;BP:peptidyl-tyrosine modification;BP:…	GO:0019219;GO:0080090;GO:0019222;GO:0016310;GO:0031323;GO:0018108;GO:0050789;GO:0044267;GO:0044260;GO:0018212;GO:0009611;GO:0018193;GO:0006796;GO:0071704;GO:0065007;GO:0031326;GO:2000112;GO:0010468;GO:0006468;GO:0060255;GO:0009987;GO:0009889;GO:0006464;GO:0050794;GO:0006950;GO:0036211;GO:0008150;GO:1903506;GO:0008152;GO:2001141;GO:0042060;GO:0044238;GO:0019538;GO:0051252;GO:0043412;GO:0044237;GO:…	------	------	------	------	------	------	PF05769.8	DUF837	Protein of unknown function	cytoplasmic	1	3	29.4	Medium
Q9NRG9	Aladin OS=Homo sapiens OX=9606 GN=AAAS PE=1 SV=1	1.24869	0.320413	0.03874	up	yes	1.19	0.953	BP:nuclear transport;BP:nuclear export;BP:regulation of metabolic process;BP:regulation of transport;BP:regulation of intracellular transport;BP:learning;BP:behavior;BP:learning or memory;BP:membrane organization;BP:protein localization;BP:organic cyclic compound biosynthetic process;BP:single-multicellular organism process;BP:organic cyclic compound metabolic process;BP:single-organism metabolic…	GO:0051169;GO:0051168;GO:0019222;GO:0051049;GO:0032386;GO:0007612;GO:0007610;GO:0007611;GO:0061024;GO:0008104;GO:1901362;GO:0044707;GO:1901360;GO:0044710;GO:0016925;GO:0010605;GO:0006409;GO:0070647;GO:0018193;GO:0075733;GO:0044419;GO:0032446;GO:0016458;GO:0048519;GO:0003008;GO:0060255;GO:0048583;GO:0045184;GO:0007077;GO:0055114;GO:0051704;GO:0044702;GO:0018205;GO:0044708;GO:0009566;GO:0010468;GO:…	K14320	AAAS	hsa03013	RNA transport	------	------	PF12894.4;PF00400.29	ANAPC4_WD40;WD40	Anaphase-promoting complex subunit 4 WD40 domain;WD domain, G-beta repeat	cytoplasmic	10	28	59.5	High
Q9NVN8	Guanine nucleotide-binding protein-like 3-like protein OS=Homo sapiens OX=9606 GN=GNL3L PE=1 SV=1	1.24211	0.312787	0.04653	up	yes	1.18	0.95	BP:regulation of primary metabolic process;BP:regulation of metabolic process;BP:regulation of response to stimulus;BP:negative regulation of homeostatic process;BP:regulation of homeostatic process;BP:regulation of G-protein coupled receptor protein signaling pathway;BP:cellular component organization or biogenesis;BP:negative regulation of macromolecule metabolic process;BP:regulation of signal…	GO:0080090;GO:0019222;GO:0048583;GO:0032845;GO:0032844;GO:0008277;GO:0071840;GO:0010605;GO:0009966;GO:0044093;GO:0044092;GO:0048518;GO:0048519;GO:0033234;GO:0051053;GO:0051052;GO:0060255;GO:0090073;GO:0010639;GO:0006275;GO:0009892;GO:0009890;GO:1904814;GO:0051100;GO:0033233;GO:0050789;GO:0032091;GO:0032092;GO:0042254;GO:0065007;GO:0065009;GO:0065008;GO:2000279;GO:2000278;GO:0009889;GO:0050794;GO:…	K14538	NUG1, GNL3	hsa03008	Ribosome biogenesis in eukaryotes	COG1161	R:General function prediction only	PF01926.20;PF02421.15	MMR_HSR1;FeoB_N	50S ribosome-binding GTPase;Ferrous iron transport protein B	cytoplasmic	3	9	65.5	High
P56270	Myc-associated zinc finger protein OS=Homo sapiens OX=9606 GN=MAZ PE=1 SV=1	0.797585	-0.326291	0.03118	down	yes	0.8255	1.035	BP:regulation of primary metabolic process;BP:regulation of metabolic process;BP:signal transduction;BP:organic cyclic compound biosynthetic process;BP:organic cyclic compound metabolic process;BP:phosphorelay signal transduction system;BP:regulation of macromolecule metabolic process;BP:regulation of RNA biosynthetic process;BP:heterocycle metabolic process;BP:regulation of gene expression;BP:ar…	GO:0080090;GO:0019222;GO:0007165;GO:1901362;GO:1901360;GO:0000160;GO:0060255;GO:2001141;GO:0046483;GO:0010468;GO:0019438;GO:0006807;GO:0035556;GO:0043170;GO:0050789;GO:1901576;GO:0044260;GO:0065007;GO:0006367;GO:0006369;GO:0018130;GO:0009889;GO:0050794;GO:0008150;GO:0008152;GO:0034654;GO:0016070;GO:0044271;GO:0006355;GO:0010556;GO:0006352;GO:0032774;GO:0044249;GO:0034641;GO:0034645;GO:0006139;GO:…	------	------	------	------	COG5048	R:General function prediction only	PF13894.3;PF13465.3;PF00096.23;PF13912.3;PF12171.5	zf-C2H2_4;zf-H2C2_2;zf-C2H2;zf-C2H2_6;zf-C2H2_jaz	C2H2-type zinc finger;Zinc-finger double domain;Zinc finger, C2H2 type;C2H2-type zinc finger;Zinc-finger double-stranded RNA-binding	cytoplasmic	2	5	48.6	High
Q6R327	Rapamycin-insensitive companion of mTOR OS=Homo sapiens OX=9606 GN=RICTOR PE=1 SV=1	0.786333	-0.346788	0.03758	down	yes	0.817	1.039	BP:activation of protein kinase B activity;BP:regulation of phosphate metabolic process;BP:regulation of primary metabolic process;BP:regulation of metabolic process;BP:regulation of homotypic cell-cell adhesion;BP:positive regulation of response to stimulus;BP:regulation of response to stimulus;BP:activation of protein kinase activity;BP:regulation of actin polymerization or depolymerization;BP:…	GO:0032148;GO:0019220;GO:0080090;GO:0019222;GO:0034110;GO:0048584;GO:0048583;GO:0032147;GO:0008064;GO:0007163;GO:0007165;GO:0051897;GO:0051896;GO:0034112;GO:0010604;GO:0045785;GO:0009966;GO:0009967;GO:0051495;GO:0032101;GO:0051493;GO:0050727;GO:0018193;GO:0044093;GO:0048518;GO:0002682;GO:0031295;GO:0031294;GO:0042127;GO:0042325;GO:0060255;GO:0045859;GO:0042327;GO:0018209;GO:0044707;GO:0044089;GO:…	K08267	RICTOR	hsa04150	mTOR signaling pathway	------	------	PF14664.3;PF14666.3;PF14665.3;PF14663.3;PF14668.3	RICTOR_N;RICTOR_M;RICTOR_phospho;RasGEF_N_2;RICTOR_V	Rapamycin-insensitive companion of mTOR, N-term;Rapamycin-insensitive companion of mTOR, middle domain;Rapamycin-insensitive companion of mTOR, phosphorylation-site;Rapamycin-insensitive companion of mTOR RasGEF_N domain;Rapamycin-insensitive companion of mTOR, domain 5	cytoplasmic	1	1	192.1	High
O76024	Wolframin OS=Homo sapiens OX=9606 GN=WFS1 PE=1 SV=2	0.764565	-0.387288	0.03493	down	yes	0.8005	1.047	BP:negative regulation of apoptotic signaling pathway;BP:regulation of phosphate metabolic process;BP:regulation of metabolic process;BP:regulation of apoptotic signaling pathway;BP:regulation of transport;BP:negative regulation of response to stimulus;BP:proteolysis involved in cellular protein catabolic process;BP:regulation of response to stimulus;BP:regulation of cyclic nucleotide metabolic p…	GO:2001234;GO:0019220;GO:0019222;GO:2001233;GO:0051049;GO:0048585;GO:0051603;GO:0048583;GO:0030799;GO:0043523;GO:0043524;GO:0055074;GO:0098771;GO:1903573;GO:1901360;GO:0080090;GO:0006984;GO:0051716;GO:0010605;GO:0010604;GO:0006983;GO:0009966;GO:0048869;GO:0001822;GO:0048513;GO:0010959;GO:0044093;GO:0044092;GO:0048518;GO:0048519;GO:0003008;GO:0043687;GO:1903892;GO:0006364;GO:0019725;GO:0030154;GO:…	K14020	WFS1	hsa04141	Protein processing in endoplasmic reticulum	------	------	------	------	------	cytoplasmic	3	5	100.2	High
Q9NWY4	Histone PARylation factor 1 OS=Homo sapiens OX=9606 GN=HPF1 PE=1 SV=2	0.736792	-0.44067	0.04327	down	yes	0.781	1.06	BP:regulation of primary metabolic process;BP:regulation of metabolic process;BP:protein homotetramerization;BP:protein ADP-ribosylation;BP:regulation of cellular macromolecule biosynthetic process;BP:RNA modification;BP:organic cyclic compound metabolic process;BP:single-organism metabolic process;BP:peptidyl-amino acid modification;BP:ncRNA processing;BP:regulation of macromolecule metabolic pr…	GO:0080090;GO:0019222;GO:0051289;GO:0006471;GO:2000112;GO:0009451;GO:1901360;GO:0044710;GO:0018193;GO:0034470;GO:0060255;GO:1903018;GO:0046483;GO:0018209;GO:0019538;GO:0033554;GO:0022607;GO:0006807;GO:0034660;GO:0044267;GO:0044260;GO:0016043;GO:0065003;GO:0065007;GO:0071840;GO:0006139;GO:0009889;GO:0051716;GO:0050794;GO:0006950;GO:0043413;GO:0008150;GO:0008152;GO:0044723;GO:0016070;GO:0050896;GO:…	------	------	------	------	------	------	PF10228.6	DUF2228	Uncharacterised conserved protein	cytoplasmic	3	10	39.4	High
Q5TCU3	Tropomyosin beta chain OS=Homo sapiens OX=9606 GN=TPM2 PE=1 SV=1	0.749525	-0.415952	0.03774	down	yes	0.7885	1.052	------	------	------	------	------	------	------	------	PF00261.17;PF12718.4;PF16526.2;PF06009.9	Tropomyosin;Tropomyosin_1;CLZ;Laminin_II	Tropomyosin;Tropomyosin like;C-terminal leucine zipper domain of cyclic nucleotide-gated channels;Laminin Domain II	cytoplasmic	2	52	32.8	High
Q03169	Tumor necrosis factor alpha-induced protein 2 OS=Homo sapiens OX=9606 GN=TNFAIP2 PE=2 SV=2	0.795898	-0.329344	0.04509	down	yes	0.815	1.024	BP:protein localization;BP:cellular protein complex localization;BP:cell differentiation;BP:secretion by cell;BP:cellular localization;BP:angiogenesis;BP:single-organism process;BP:cellular macromolecule localization;BP:cellular developmental process;BP:exocytosis;BP:multicellular organism development;BP:macromolecule localization;BP:cellular protein localization;BP:developmental process;BP:prote…	GO:0008104;GO:0034629;GO:0030154;GO:0032940;GO:0051641;GO:0001525;GO:0044699;GO:0070727;GO:0048869;GO:0006887;GO:0007275;GO:0033036;GO:0034613;GO:0032502;GO:0031503;GO:0006810;GO:0032501;GO:0009987;GO:0044767;GO:0044765;GO:0044763;GO:0051234;GO:0051179;GO:1902578;GO:0046903;GO:0051601;GO:0016192;GO:0044707;GO:0048856;GO:0048646;GO:0008150;GO:0000323;GO:0043227;GO:0043226;GO:0005764;GO:0005615;GO:…	K19989	TNFAIP2, EXOC3L3	------	------	COG5173	U:Intracellular trafficking, secretion, and vesicular transport	PF06046.10	Sec6	Exocyst complex component Sec6	nuclear	4	8	72.6	High
A0A2R8Y602	Caseinolytic peptidase B protein homolog (Fragment) OS=Homo sapiens OX=9606 GN=CLPB PE=1 SV=1	0.787805	-0.34409	0.03134	down	yes	0.8075	1.025	BP:cellular response to heat;BP:cellular response to stimulus;BP:cellular response to stress;BP:cellular process;BP:response to stress;BP:biological_process;BP:response to temperature stimulus;BP:response to heat;BP:response to abiotic stimulus;BP:response to stimulus;CC:intracellular organelle;CC:membrane-bounded organelle;CC:organelle;CC:mitochondrion;CC:intracellular membrane-bounded organelle…	GO:0034605;GO:0051716;GO:0033554;GO:0009987;GO:0006950;GO:0008150;GO:0009266;GO:0009408;GO:0009628;GO:0050896;GO:0043229;GO:0043227;GO:0043226;GO:0005739;GO:0043231;GO:0044464;GO:0005575;GO:0044444;GO:0044424;GO:0035639;GO:0003674;GO:0005488;GO:0016887;GO:0000166;GO:0001883;GO:0001882;GO:0043168;GO:1901363;GO:0043167;GO:1901265;GO:0032549;GO:0017076;GO:0005524;GO:0016787;GO:0017111;GO:0036094;GO:…	------	------	------	------	COG0542	O:Posttranslational modification, protein turnover, chaperones	PF07724.11;PF12796.4;PF00023.27;PF13857.3;PF07728.11;PF00004.26;PF13606.3;PF00158.23;PF06414.9	AAA_2;Ank_2;Ank;Ank_5;AAA_5;AAA;Ank_3;Sigma54_activat;Zeta_toxin	AAA domain;Ankyrin repeats;Ankyrin repeat;Ankyrin repeats;AAA domain;ATPase family associated with various cellular activities;Ankyrin repeat;Sigma-54 interaction domain;Zeta toxin	cytoplasmic	1	27	43.3	High
Q5JSH3	WD repeat-containing protein 44 OS=Homo sapiens OX=9606 GN=WDR44 PE=1 SV=1	0.796569	-0.328129	0.018	down	yes	0.8125	1.02	BP:regulation of biological process;BP:biological regulation;BP:regulation of cell migration;BP:regulation of cellular process;BP:regulation of locomotion;BP:biological_process;BP:regulation of localization;BP:regulation of cellular component movement;BP:regulation of cell motility;CC:supramolecular fiber;CC:polymeric cytoskeletal fiber;CC:Golgi apparatus;CC:intracellular organelle;CC:vacuolar me…	GO:0050789;GO:0065007;GO:0030334;GO:0050794;GO:0040012;GO:0008150;GO:0032879;GO:0051270;GO:2000145;GO:0099512;GO:0099513;GO:0005794;GO:0043229;GO:0005774;GO:0043227;GO:0031224;GO:0005737;GO:0044446;GO:0031090;GO:0005773;GO:0005874;GO:0016021;GO:0016020;GO:0043226;GO:0044430;GO:0044437;GO:0048471;GO:0010008;GO:0044440;GO:0098588;GO:0043231;GO:0005829;GO:0044464;GO:0005575;GO:0044444;GO:0044424;GO:…	K20241	WDR44, RAB11BP	------	------	------	------	PF00400.29	WD40	WD domain, G-beta repeat	cytoplasmic	2	4	101.3	High
Q9BQ61	Telomerase RNA component interacting RNase OS=Homo sapiens OX=9606 GN=TRIR PE=1 SV=1	0.769082	-0.37879	0.02543	down	yes	0.796	1.035	BP:organic cyclic compound metabolic process;BP:organic cyclic compound catabolic process;BP:single-organism metabolic process;BP:mitochondrial tRNA processing;BP:ncRNA processing;BP:aromatic compound catabolic process;BP:heterocycle metabolic process;BP:ncRNA catabolic process;BP:nitrogen compound metabolic process;BP:mitochondrial tRNA 3'-end processing;BP:ncRNA metabolic process;BP:organic sub…	GO:1901360;GO:1901361;GO:0044710;GO:0090646;GO:0034470;GO:0019439;GO:0046483;GO:0034661;GO:0006807;GO:1990180;GO:0034660;GO:1901575;GO:0044265;GO:0044260;GO:0016043;GO:0071840;GO:0046700;GO:0008150;GO:0008152;GO:0034655;GO:0016070;GO:0016072;GO:0016075;GO:0043628;GO:0044248;GO:0034641;GO:0007005;GO:0044699;GO:0006139;GO:0000963;GO:0000965;GO:0034414;GO:0008033;GO:0009987;GO:0006725;GO:0044270;GO:…	------	------	------	------	------	------	------	------	------	cytoplasmic	1	14	18.4	High
P51580	Thiopurine S-methyltransferase OS=Homo sapiens OX=9606 GN=TPMT PE=1 SV=1	0.787879	-0.343954	0.03802	down	yes	0.806	1.023	BP:organic cyclic compound metabolic process;BP:organic substance metabolic process;BP:response to organic substance;BP:heterocycle metabolic process;BP:response to organic cyclic compound;BP:cellular component assembly;BP:nitrogen compound metabolic process;BP:cellular component organization;BP:response to endogenous stimulus;BP:macromolecular complex assembly;BP:cellular component organization …	GO:1901360;GO:0071704;GO:0010033;GO:0046483;GO:0014070;GO:0022607;GO:0006807;GO:0016043;GO:0009719;GO:0065003;GO:0071840;GO:0032259;GO:0008150;GO:0008152;GO:1901698;GO:0034641;GO:0014074;GO:0006139;GO:0009987;GO:0006725;GO:0051259;GO:0033198;GO:0050896;GO:0043933;GO:0071822;GO:0017144;GO:0051291;GO:0046683;GO:0006461;GO:0010243;GO:0042221;GO:1901700;GO:0044238;GO:0044237;GO:0031982;GO:0016021;GO:…	K00569	TPMT, tpmT	hsa00983	Drug metabolism - other enzymes	------	------	PF05724.8	TPMT	Thiopurine S-methyltransferase	cytoplasmic	1	4	28.2	High
O95104	SR-related and CTD-associated factor 4 OS=Homo sapiens OX=9606 GN=SCAF4 PE=1 SV=3	0.777237	-0.363573	0.02114	down	yes	0.799	1.028	CC:cytoplasmic part;CC:organelle;CC:intracellular organelle;CC:membrane-bounded organelle;CC:intrinsic component of membrane;CC:cellular_component;CC:integral component of membrane;CC:nucleoplasm;CC:respiratory chain complex;CC:cytochrome complex;CC:inner mitochondrial membrane protein complex;CC:mitochondrial respiratory chain complex IV;CC:nuclear part;CC:protein complex;CC:intracellular organe…	GO:0044444;GO:0043226;GO:0043229;GO:0043227;GO:0031224;GO:0005575;GO:0016021;GO:0005654;GO:0098803;GO:0070069;GO:0098800;GO:0005751;GO:0044428;GO:0043234;GO:0044446;GO:0032991;GO:0045277;GO:0005634;GO:0044455;GO:0044464;GO:0043231;GO:0098796;GO:0044429;GO:0044424;GO:0044425;GO:0044422;GO:0098798;GO:0003674;GO:0005488;GO:0003676;GO:0000166;GO:1901363;GO:0016491;GO:0015077;GO:1901265;GO:0015002;GO:…	K13167	SFRS15, SCAF4	------	------	------	------	PF04818.10;PF00076.19	CTD_bind;RRM_1	RNA polymerase II-binding domain.;RNA recognition motif.	cytoplasmic	4	8	125.8	High
O60826	Coiled-coil domain-containing protein 22 OS=Homo sapiens OX=9606 GN=CCDC22 PE=1 SV=1	0.790686	-0.338823	0.009563	down	yes	0.8065	1.02	BP:regulation of intracellular protein transport;BP:regulation of secretion;BP:positive regulation of secretion;BP:regulation of transport;BP:purine ribonucleoside monophosphate metabolic process;BP:small molecule metabolic process;BP:small molecule catabolic process;BP:ribonucleoside monophosphate metabolic process;BP:inorganic ion homeostasis;BP:maintenance of location in cell;BP:ribonucleoside…	GO:0033157;GO:0051046;GO:0051047;GO:0051049;GO:0009167;GO:0044281;GO:0044282;GO:0009161;GO:0098771;GO:0051651;GO:0009199;GO:0048585;GO:0048584;GO:0046483;GO:0051196;GO:0051197;GO:0051194;GO:0051193;GO:0034284;GO:0019538;GO:0045821;GO:1904589;GO:0009896;GO:0019320;GO:0009894;GO:0009893;GO:0010906;GO:0051220;GO:0051222;GO:0051223;GO:0051224;GO:0050789;GO:0051347;GO:0045981;GO:0006110;GO:0045913;GO:…	------	------	------	------	------	------	PF05667.8	DUF812	Protein of unknown function	cytoplasmic	7	19	70.7	High
P67936	Tropomyosin alpha-4 chain OS=Homo sapiens OX=9606 GN=TPM4 PE=1 SV=3	0.785784	-0.347795	0.02702	down	yes	0.8015	1.02	BP:muscle system process;BP:signal transduction;BP:cellular component organization or biogenesis;BP:neuropeptide signaling pathway;BP:cellular developmental process;BP:muscle contraction;BP:muscle filament sliding;BP:actin filament-based movement;BP:system process;BP:movement of cell or subcellular component;BP:cellular component organization;BP:biological regulation;BP:G-protein coupled receptor…	GO:0003012;GO:0007165;GO:0071840;GO:0007218;GO:0048869;GO:0006936;GO:0030049;GO:0030048;GO:0003008;GO:0006928;GO:0016043;GO:0065007;GO:0007186;GO:0050794;GO:0008150;GO:0030154;GO:0044699;GO:0033275;GO:0032502;GO:0032501;GO:0009987;GO:0043933;GO:0001649;GO:0071822;GO:0050789;GO:0030029;GO:0044767;GO:0044763;GO:0007015;GO:0070252;GO:0032432;GO:0099512;GO:0099513;GO:0097517;GO:0030055;GO:0031982;GO:…	K10375	TPM4	hsa05410;hsa05414;hsa04260;hsa04261	Hypertrophic cardiomyopath;Dilated cardiomyopathy;Cardiac muscle contraction;Adrenergic signaling in cardiomyocytes	------	------	PF00261.17;PF12718.4;PF06009.9	Tropomyosin;Tropomyosin_1;Laminin_II	Tropomyosin;Tropomyosin like;Laminin Domain II	cytoplasmic	6	61	28.5	High
Q9NRY5	Protein FAM114A2 OS=Homo sapiens OX=9606 GN=FAM114A2 PE=1 SV=4	0.760638	-0.394718	0.01967	down	yes	0.7865	1.034	BP:regulation of primary metabolic process;BP:regulation of metabolic process;BP:negative regulation of response to stimulus;BP:regulation of response to stimulus;BP:negative regulation of vascular permeability;BP:regulation of actin polymerization or depolymerization;BP:regulation of cell projection assembly;BP:establishment or maintenance of cell polarity;BP:signal transduction;BP:vascular proc…	GO:0080090;GO:0019222;GO:0048585;GO:0048583;GO:0043116;GO:0008064;GO:0060491;GO:0007163;GO:0007165;GO:0003018;GO:1901362;GO:0071840;GO:0031346;GO:0051716;GO:0010605;GO:0009968;GO:0009966;GO:0048869;GO:0051493;GO:0097659;GO:0045664;GO:0019438;GO:0048513;GO:0010720;GO:0048522;GO:0048518;GO:0048519;GO:0003008;GO:0010769;GO:0051056;GO:0051960;GO:0060255;GO:0031668;GO:0051058;GO:0008360;GO:0010976;GO:…	------	------	------	------	------	------	PF05334.10	DUF719	Protein of unknown function	cytoplasmic	2	5	55.4	High
B7Z645	Heterogeneous nuclear ribonucleoprotein Q OS=Homo sapiens OX=9606 GN=SYNCRIP PE=1 SV=1	0.782843	-0.353205	0.009254	down	yes	0.7985	1.02	BP:regulation of metabolic process;BP:negative regulation of mRNA modification;BP:regulation of mRNA modification;BP:RNA splicing, via transesterification reactions with bulged adenosine as nucleophile;BP:negative regulation of cellular macromolecule biosynthetic process;BP:CRD-mediated mRNA stabilization;BP:organic cyclic compound metabolic process;BP:regulation of primary metabolic process;BP:s…	GO:0019222;GO:0090367;GO:0090365;GO:0000377;GO:2000113;GO:0070934;GO:1901360;GO:0080090;GO:0044710;GO:0010605;GO:0010604;GO:0071704;GO:0010608;GO:0044419;GO:0048511;GO:0048518;GO:0048519;GO:0046483;GO:0060255;GO:0010033;GO:0055114;GO:0051704;GO:0045727;GO:0000398;GO:0051252;GO:0009892;GO:0009893;GO:0009890;GO:0009891;GO:0010628;GO:0050789;GO:0044260;GO:0065007;GO:0065008;GO:0007623;GO:0034097;GO:…	K13160	SYNCRIP, HNRPQ	------	------	------	------	PF00076.19;PF13893.3	RRM_1;RRM_5	RNA recognition motif.;RNA recognition motif.	cytoplasmic	1	51	52	High
Q96GQ5	RUS1 family protein C16orf58 OS=Homo sapiens OX=9606 GN=C16orf58 PE=1 SV=2	0.763337	-0.389609	0.01582	down	yes	0.787	1.031	BP:cell-cell adhesion;BP:biological_process;BP:cell adhesion;BP:heterophilic cell-cell adhesion via plasma membrane cell adhesion molecules;BP:biological adhesion;BP:cell-cell adhesion via plasma-membrane adhesion molecules;CC:focal adhesion;CC:integral component of membrane;CC:cell junction;CC:membrane;CC:cellular_component;CC:intrinsic component of membrane;CC:adherens junction;CC:anchoring jun…	GO:0098609;GO:0008150;GO:0007155;GO:0007157;GO:0022610;GO:0098742;GO:0005925;GO:0016021;GO:0030054;GO:0016020;GO:0005575;GO:0031224;GO:0005912;GO:0070161;GO:0044425;GO:0005924;GO:0030055	------	------	------	------	------	------	PF04884.11	DUF647	Vitamin B6 photo-protection and homoeostasis	cytoplasmic	3	9	51	High
Q9UMX0	Ubiquilin-1 OS=Homo sapiens OX=9606 GN=UBQLN1 PE=1 SV=2	0.741611	-0.431266	0.02568	down	yes	0.7735	1.043	BP:primary metabolic process;BP:positive regulation of proteasomal ubiquitin-dependent protein catabolic process;BP:regulation of metabolic process;BP:regulation of apoptotic signaling pathway;BP:regulation of transport;BP:negative regulation of response to stimulus;BP:positive regulation of response to stimulus;BP:regulation of response to stimulus;BP:regulation of ion transmembrane transport;BP…	GO:0044238;GO:0032436;GO:0019222;GO:2001233;GO:0051049;GO:0048585;GO:0048584;GO:0048583;GO:0034765;GO:0034766;GO:0071840;GO:0034763;GO:0051716;GO:0009968;GO:1904294;GO:0070647;GO:1904292;GO:1905037;GO:1903201;GO:0044092;GO:0048518;GO:0048519;GO:0097576;GO:1903069;GO:0002683;GO:0051051;GO:0060255;GO:1901800;GO:1900407;GO:0030162;GO:0032108;GO:0033043;GO:0019538;GO:0010639;GO:0030163;GO:0010507;GO:…	K04523	UBQLN, DSK2	hsa04141	Protein processing in endoplasmic reticulum	COG5272	O:Posttranslational modification, protein turnover, chaperones	PF00240.20;PF00627.28;PF11976.5	ubiquitin;UBA;Rad60-SLD	Ubiquitin family;UBA/TS-N domain;Ubiquitin-2 like Rad60 SUMO-like	cytoplasmic	5	35	62.5	High
O95363	Phenylalanine--tRNA ligase, mitochondrial OS=Homo sapiens OX=9606 GN=FARS2 PE=1 SV=1	0.79496	-0.331045	0.03903	down	yes	0.8045	1.012	BP:regulation of cytokine secretion;BP:regulation of primary metabolic process;BP:regulation of metabolic process;BP:positive regulation of secretion;BP:regulation of transport;BP:protein acetylation;BP:positive regulation of response to stimulus;BP:regulation of response to stimulus;BP:positive regulation of transcription, DNA-templated;BP:small molecule metabolic process;BP:organic substance bi…	GO:0050707;GO:0080090;GO:0019222;GO:0051047;GO:0051049;GO:0006473;GO:0048584;GO:0048583;GO:0045893;GO:0044281;GO:1901576;GO:0032732;GO:1901360;GO:0010243;GO:0044710;GO:0010604;GO:0009966;GO:0009967;GO:0071840;GO:0043043;GO:0018193;GO:0030856;GO:0048518;GO:0030858;GO:0034470;GO:0043966;GO:0043967;GO:0060255;GO:0006475;GO:2001141;GO:0043436;GO:0043434;GO:0010033;GO:0046483;GO:1901564;GO:1901566;GO:…	K01889	FARSA, pheS	hsa00970	Aminoacyl-tRNA biosynthesis	COG0016;COG0072	J:Translation, ribosomal structure and biogenesis;	PF01409.17;PF03147.11	tRNA-synt_2d;FDX-ACB	tRNA synthetases class II core domain;Ferredoxin-fold anticodon binding domain	peroxisomal	4	11	52.3	High
Q01968	Inositol polyphosphate 5-phosphatase OCRL OS=Homo sapiens OX=9606 GN=OCRL PE=1 SV=3	0.792984	-0.334636	0.009577	down	yes	0.8025	1.012	BP:regulation of response to stimulus;BP:membrane organization;BP:small molecule metabolic process;BP:cellular component organization or biogenesis;BP:single-organism metabolic process;BP:single-organism biosynthetic process;BP:positive regulation of molecular function;BP:phosphatidylinositol biosynthetic process;BP:phosphatidylinositol metabolic process;BP:glycerolipid metabolic process;BP:singl…	GO:0048583;GO:0061024;GO:0044281;GO:0071840;GO:0044710;GO:0044711;GO:0044093;GO:0006661;GO:0046488;GO:0046486;GO:0044707;GO:0044249;GO:0043647;GO:0019637;GO:0007165;GO:1901576;GO:0010646;GO:0043547;GO:0051345;GO:0016043;GO:0065007;GO:0046856;GO:0065009;GO:0043085;GO:0006629;GO:0050790;GO:0050794;GO:0008150;GO:0008152;GO:1902531;GO:0090407;GO:0051336;GO:0008654;GO:0009966;GO:0044767;GO:0048869;GO:…	K01099	INPP5B_F	hsa00562;hsa04070	Inositol phosphate metabolism;Phosphatidylinositol signaling system	COG5411	T:Signal transduction mechanisms	PF16726.2;PF03372.20;PF00620.24	OCRL_clath_bd;Exo_endo_phos;RhoGAP	Inositol polyphosphate 5-phosphatase clathrin binding domain;Endonuclease/Exonuclease/phosphatase family;RhoGAP domain	cytoplasmic	2	3	104.1	High
Q8TF01	Arginine/serine-rich protein PNISR OS=Homo sapiens OX=9606 GN=PNISR PE=1 SV=2	0.769043	-0.378864	0.01207	down	yes	0.7875	1.024	BP:response to endogenous stimulus;BP:response to stimulus;BP:cellular process involved in reproduction in multicellular organism;BP:cell development;BP:multicellular organism development;BP:female gamete generation;BP:single-organism process;BP:cellular developmental process;BP:gamete generation;BP:response to steroid hormone;BP:oogenesis;BP:developmental process;BP:multicellular organismal proc…	GO:0009719;GO:0050896;GO:0022412;GO:0048468;GO:0007275;GO:0007292;GO:0044699;GO:0048869;GO:0007276;GO:0048545;GO:0048477;GO:0032502;GO:0032501;GO:0048609;GO:0009987;GO:0044767;GO:0003006;GO:0008150;GO:0042221;GO:0010033;GO:0007281;GO:0044702;GO:0044707;GO:0022414;GO:0048856;GO:0014070;GO:0009725;GO:0044763;GO:0033993;GO:0043229;GO:0043227;GO:0016607;GO:0044446;GO:0016604;GO:0005634;GO:0016020;GO:…	K13170	SFRS18	------	------	------	------	PF15996.2	PNISR	Arginine/serine-rich protein PNISR	nuclear	2	3	92.5	High
P23634	Plasma membrane calcium-transporting ATPase 4 OS=Homo sapiens OX=9606 GN=ATP2B4 PE=1 SV=2	0.724286	-0.465369	0.02858	down	yes	0.7605	1.05	BP:regulation of transport;BP:negative regulation of calcium-mediated signaling;BP:regulation of calcium-mediated signaling;BP:inorganic ion homeostasis;BP:cellular response to stimulus;BP:negative regulation of cellular amine metabolic process;BP:regulation of cellular amine metabolic process;BP:inorganic ion transmembrane transport;BP:spermatogenesis;BP:regulation of phosphorylation;BP:negative…	GO:0051049;GO:0050849;GO:0050848;GO:0098771;GO:0051716;GO:0033239;GO:0033238;GO:0098660;GO:0007283;GO:0042325;GO:0051001;GO:0009894;GO:0009895;GO:0009892;GO:0009893;GO:0009890;GO:0071867;GO:0071868;GO:0071869;GO:0071900;GO:0050789;GO:0051341;GO:0051347;GO:0097553;GO:2000378;GO:0050790;GO:2000377;GO:1903522;GO:0050999;GO:0010556;GO:0071871;GO:0021766;GO:0098736;GO:0051174;GO:0009415;GO:1904406;GO:…	------	------	------	------	------	------	PF00689.18;PF00122.17;PF12424.5;PF13246.3;PF00690.23;PF00702.23;PF08282.9	Cation_ATPase_C;E1-E2_ATPase;ATP_Ca_trans_C;Cation_ATPase;Cation_ATPase_N;Hydrolase;Hydrolase_3	Cation transporting ATPase, C-terminus;E1-E2 ATPase;Plasma membrane calcium transporter ATPase C terminal;Cation transport ATPase;Cation transporter/ATPase, N-terminus;haloacid dehalogenase-like hydrolase;haloacid dehalogenase-like hydrolase	cytoplasmic	3	11	137.8	High
Q9Y376	Calcium-binding protein 39 OS=Homo sapiens OX=9606 GN=CAB39 PE=1 SV=1	0.790801	-0.338613	0.03099	down	yes	0.7995	1.011	BP:exocytosis;BP:regulation of phosphate metabolic process;BP:regulation of primary metabolic process;BP:regulation of metabolic process;BP:regulation of transport;BP:activation of protein kinase activity;BP:positive regulation of peptidyl-threonine phosphorylation;BP:signal transduction;BP:regulation of ion transmembrane transport;BP:negative regulation of ion transmembrane transport;BP:negative…	GO:0006887;GO:0019220;GO:0080090;GO:0019222;GO:0051049;GO:0032147;GO:0010800;GO:0007165;GO:0034765;GO:0034766;GO:0032413;GO:0023014;GO:0034763;GO:0065003;GO:0044710;GO:0032879;GO:0045786;GO:0010604;GO:0071840;GO:0002263;GO:0010257;GO:0018193;GO:0022900;GO:0044093;GO:0022904;GO:0048518;GO:0048519;GO:0051051;GO:0060255;GO:0045859;GO:1901379;GO:0002275;GO:0055114;GO:0042325;GO:0042327;GO:0018209;GO:…	K08272	CAB39, MO25	hsa04152;hsa04150	AMPK signaling pathway;mTOR signaling pathway	------	------	PF08569.8	Mo25	Mo25-like	cytoplasmic	4	16	39.8	High
O60231	Pre-mRNA-splicing factor ATP-dependent RNA helicase DHX16 OS=Homo sapiens OX=9606 GN=DHX16 PE=1 SV=2	0.784024	-0.351031	0.004247	down	yes	0.795	1.014	BP:regulation of protein localization;BP:regulation of peptide transport;BP:positive regulation of dendritic spine morphogenesis;BP:primary metabolic process;BP:regulation of secretion;BP:lactation;BP:regulation of transport;BP:learning;BP:memory;BP:behavior;BP:learning or memory;BP:positive regulation of neuron differentiation;BP:signal transduction;BP:cell surface receptor signaling pathway;BP:…	GO:0032880;GO:0090087;GO:0061003;GO:0044238;GO:0051046;GO:0007595;GO:0051049;GO:0007612;GO:0007613;GO:0007610;GO:0007611;GO:0045666;GO:0007165;GO:0007166;GO:0007167;GO:0048266;GO:1901360;GO:0031346;GO:0032879;GO:0071704;GO:0009966;GO:0048523;GO:0009612;GO:0060999;GO:0010720;GO:0048518;GO:0048519;GO:0016192;GO:0051056;GO:0051051;GO:0035176;GO:0048583;GO:0007264;GO:0007528;GO:0090276;GO:0010976;GO:…	K12813	DHX16	hsa03040	Spliceosome	COG1643	L:Replication, recombination and repair	PF04408.20;PF07717.13;PF00271.28;PF00270.26	HA2;OB_NTP_bind;Helicase_C;DEAD	Helicase associated domain;Oligonucleotide/oligosaccharide-binding;Helicase conserved C-terminal domain;DEAD/DEAH box helicase	nuclear	7	10	119.2	High
Q86YS6	Ras-related protein Rab-43 OS=Homo sapiens OX=9606 GN=RAB43 PE=1 SV=1	0.762671	-0.390868	0.01121	down	yes	0.7825	1.026	BP:signal transduction;BP:cellular component organization or biogenesis;BP:cellular response to stimulus;BP:interspecies interaction between organisms;BP:positive regulation of biological process;BP:biological regulation;BP:response to organic substance;BP:multi-organism process;BP:neural retina development;BP:cellular component assembly;BP:intracellular signal transduction;BP:regulation of biolo…	GO:0007165;GO:0071840;GO:0051716;GO:0044419;GO:0048518;GO:0065007;GO:0010033;GO:0051704;GO:0003407;GO:0022607;GO:0035556;GO:0050789;GO:0090068;GO:0016043;GO:0034097;GO:0006810;GO:0050794;GO:0008150;GO:0051234;GO:0045787;GO:0044767;GO:0046907;GO:0071345;GO:0050896;GO:0071346;GO:0019068;GO:0051649;GO:0070887;GO:1901998;GO:0044699;GO:0010564;GO:0032502;GO:0009987;GO:0035526;GO:0007030;GO:0051302;GO:…	K07930	RAB43	------	------	------	------	PF00071.19;PF08477.10;PF00025.18	Ras;Roc;Arf	Ras family;Ras of Complex, Roc, domain of DAPkinase;ADP-ribosylation factor family	cytoplasmic	1	17	23.3	High
P05546	Heparin cofactor 2 OS=Homo sapiens OX=9606 GN=SERPIND1 PE=1 SV=3	0.781281	-0.356087	0.01052	down	yes	0.793	1.015	BP:hemostasis;BP:regulation of primary metabolic process;BP:regulation of metabolic process;BP:blood coagulation;BP:negative regulation of macromolecule metabolic process;BP:taxis;BP:negative regulation of molecular function;BP:negative regulation of biological process;BP:chemotaxis;BP:regulation of macromolecule metabolic process;BP:regulation of proteolysis;BP:single-multicellular organism proc…	GO:0007599;GO:0080090;GO:0019222;GO:0007596;GO:0010605;GO:0042330;GO:0044092;GO:0048519;GO:0006935;GO:0060255;GO:0030162;GO:0044707;GO:0019538;GO:0009892;GO:0050789;GO:0044267;GO:0051346;GO:0044260;GO:0065007;GO:0065009;GO:0065008;GO:0050790;GO:0050794;GO:0043412;GO:0036211;GO:0008150;GO:0008152;GO:0051336;GO:0050817;GO:0043086;GO:0044699;GO:0051248;GO:0051246;GO:0032501;GO:0050878;GO:0043687;GO:…	K03912	SERPIND1, HCF2	hsa04610	Complement and coagulation cascades	COG4826	O:Posttranslational modification, protein turnover, chaperones	PF00079.17	Serpin	Serpin	ER	1	2	57	High
M0QXZ5	Zinc finger protein 428 (Fragment) OS=Homo sapiens OX=9606 GN=ZNF428 PE=1 SV=1	0.703582	-0.50721	0.04018	down	yes	0.7465	1.061	BP:regulation of primary metabolic process;BP:regulation of metabolic process;BP:regulation of cellular biosynthetic process;BP:regulation of cellular metabolic process;BP:regulation of biological process;BP:regulation of cellular macromolecule biosynthetic process;BP:regulation of nucleobase-containing compound metabolic process;BP:biological regulation;BP:regulation of gene expression;BP:regula…	GO:0080090;GO:0019222;GO:0031326;GO:0031323;GO:0050789;GO:2000112;GO:0019219;GO:0065007;GO:0010468;GO:0060255;GO:0009889;GO:1903506;GO:0050794;GO:0008150;GO:0051171;GO:2001141;GO:0051252;GO:0006355;GO:0010556;GO:0044464;GO:0005622;GO:0005575;GO:0003674;GO:0005488;GO:0003676;GO:1901363;GO:0097159	------	------	------	------	------	------	------	------	------	peroxisomal	1	8	23.6	High
Q5C9Z4	Nucleolar MIF4G domain-containing protein 1 OS=Homo sapiens OX=9606 GN=NOM1 PE=1 SV=1	0.735577	-0.443052	0.02492	down	yes	0.765	1.04	BP:single-multicellular organism process;BP:cell differentiation;BP:cellular component organization or biogenesis;BP:ribosomal small subunit biogenesis;BP:developmental maturation;BP:hair follicle maturation;BP:single-organism process;BP:ribonucleoprotein complex biogenesis;BP:developmental process;BP:multicellular organismal process;BP:cellular process;BP:hair cycle process;BP:single-organism de…	GO:0044707;GO:0030154;GO:0071840;GO:0042274;GO:0021700;GO:0048820;GO:0044699;GO:0022613;GO:0032502;GO:0032501;GO:0009987;GO:0022405;GO:0044767;GO:0008150;GO:0022008;GO:0071695;GO:0022404;GO:0044085;GO:0048869;GO:0044763;GO:0043229;GO:0043228;GO:0043227;GO:0043226;GO:0005575;GO:0005634;GO:0043231;GO:0043232;GO:0005730;GO:0044464;GO:0044446;GO:0044428;GO:0044424;GO:0044422;GO:0003674;GO:0005488;GO:…	K17583	NOM1	------	------	------	------	PF02847.14;PF02854.16	MA3;MIF4G	MA3 domain;MIF4G domain	nuclear	2	4	96.2	High
P06213	Insulin receptor OS=Homo sapiens OX=9606 GN=INSR PE=1 SV=4	0.779093	-0.360133	0.01246	down	yes	0.79	1.014	BP:cellular component maintenance;BP:response to manganese ion;BP:cellular response to stimulus;BP:peptidyl-tyrosine modification;BP:regulation of transport;BP:regulation of mitotic nuclear division;BP:regulation of protein kinase activity;BP:protein heterooligomerization;BP:protein heterotetramerization;BP:heterocycle metabolic process;BP:regulation of phosphorylation;BP:positive regulation of c…	GO:0043954;GO:0010042;GO:0051716;GO:0018212;GO:0051049;GO:0007088;GO:0045859;GO:0051291;GO:0051290;GO:0046483;GO:0042325;GO:0051197;GO:0042327;GO:0042326;GO:0051193;GO:0009605;GO:0019538;GO:0010638;GO:0006275;GO:0051783;GO:0051781;GO:0045821;GO:0009896;GO:0009894;GO:0060263;GO:0032410;GO:0009893;GO:0060267;GO:0019087;GO:0010906;GO:0010907;GO:0071902;GO:0071900;GO:0050789;GO:0051347;GO:0045981;GO:…	K04527	INSR, CD220	hsa04960;hsa04913;hsa04022;hsa04923;hsa04932;hsa04910;hsa04072;hsa04930;hsa04211;hsa04015;hsa04014;hsa04520;hsa04068;hsa04066;hsa04213;hsa04152;hsa04931;hsa04150;hsa04151	Aldosterone-regulated sodium reabsorption;Ovarian steroidogenesis;cGMP-PKG signaling pathway;Regulation of lipolysis in adipocytes;Non-alcoholic fatty liver diseas;Insulin signaling pathway;Phospholipase D signaling pathway;Type II diabetes mellitus;Longevity regulating pathway;Rap1 signaling pathway;Ras signaling pathway;Adherens junction;FoxO signaling pathway;HIF-1 signaling pathway;Longevity …	COG0515	T:Signal transduction mechanisms	PF07714.14;PF01030.21;PF00069.22;PF00757.17;PF00041.18	Pkinase_Tyr;Recep_L_domain;Pkinase;Furin-like;fn3	Protein tyrosine kinase;Receptor L domain;Protein kinase domain;Furin-like cysteine rich region;Fibronectin type III domain	plasma membrane	1	2	156.2	High
Q8NDT2	Putative RNA-binding protein 15B OS=Homo sapiens OX=9606 GN=RBM15B PE=1 SV=3	0.787909	-0.343899	0.02076	down	yes	0.795	1.009	BP:nuclear transport;BP:regulation of primary metabolic process;BP:regulation of metabolic process;BP:regulation of mRNA processing;BP:organic cyclic compound biosynthetic process;BP:organic cyclic compound metabolic process;BP:negative regulation of macromolecule metabolic process;BP:interspecies interaction between organisms;BP:negative regulation of biological process;BP:multi-organism process…	GO:0051169;GO:0080090;GO:0019222;GO:0050684;GO:1901362;GO:1901360;GO:0010605;GO:0044419;GO:0048519;GO:0051704;GO:0060255;GO:2001141;GO:0046483;GO:0019438;GO:0009892;GO:0009890;GO:0006807;GO:0050789;GO:0097659;GO:1901576;GO:0000381;GO:0044260;GO:0065007;GO:0018130;GO:0006810;GO:0009889;GO:0050794;GO:0008150;GO:0008152;GO:0034654;GO:0051234;GO:0016070;GO:1902679;GO:0044271;GO:0046907;GO:0006355;GO:…	K13190	RBM15	------	------	------	------	PF00076.19;PF07744.10	RRM_1;SPOC	RNA recognition motif.;SPOC domain	cytoplasmic	3	7	97.1	High
A0A087X2H1	E3 ubiquitin-protein ligase HECTD1 OS=Homo sapiens OX=9606 GN=HECTD1 PE=1 SV=1	0.757797	-0.400116	0.04021	down	yes	0.7775	1.026	BP:metabolic process;BP:regulation of biological process;BP:positive regulation of cell death;BP:regulation of cell death;BP:cellular macromolecule metabolic process;BP:organic substance metabolic process;BP:regulation of apoptotic process;BP:protein modification by small protein conjugation or removal;BP:positive regulation of apoptotic process;BP:protein modification by small protein conjugatio…	GO:0008152;GO:0050789;GO:0010942;GO:0010941;GO:0044260;GO:0071704;GO:0042981;GO:0070647;GO:0043065;GO:0032446;GO:0043067;GO:0048518;GO:0065007;GO:0042787;GO:0043068;GO:0044267;GO:0009987;GO:0006464;GO:0050794;GO:0043412;GO:0036211;GO:0008150;GO:0044238;GO:0019538;GO:0043170;GO:0016567;GO:0044237;GO:0048522;GO:0035770;GO:0000932;GO:0043229;GO:0043228;GO:0036464;GO:1990904;GO:0043227;GO:0043226;GO:…	K12231	HECTD1	------	------	COG5021	O:Posttranslational modification, protein turnover, chaperones	PF00632.22;PF07738.10;PF06701.10;PF12796.4;PF13857.3;PF13637.3;PF00023.27	HECT;Sad1_UNC;MIB_HERC2;Ank_2;Ank_5;Ank_4;Ank	HECT-domain;Sad1 / UNC-like C-terminal;Mib_herc2;Ankyrin repeats;Ankyrin repeats;Ankyrin repeats;Ankyrin repeat	cytoplasmic	1	0	289.5	Medium
P62979	Ubiquitin-40S ribosomal protein S27a OS=Homo sapiens OX=9606 GN=RPS27A PE=1 SV=2	0.75731	-0.401044	0.01079	down	yes	0.777	1.026	BP:cellular response to stimulus;BP:postreplication repair;BP:signal transduction involved in DNA damage checkpoint;BP:MAPK cascade;BP:intracellular transport of virus;BP:transcription-coupled nucleotide-excision repair;BP:DNA repair;BP:negative regulation of cell death;BP:regulation of protein kinase activity;BP:nucleotide-excision repair;BP:heterocycle metabolic process;BP:regulation of phospho…	GO:0051716;GO:0006301;GO:0072422;GO:0000165;GO:0075733;GO:0006283;GO:0006281;GO:0060548;GO:0045859;GO:0006289;GO:0046483;GO:0042325;GO:0042327;GO:0019538;GO:0000717;GO:0000715;GO:0009896;GO:0009894;GO:0009892;GO:0009893;GO:0009890;GO:0009891;GO:0090263;GO:0019083;GO:0051254;GO:0030177;GO:0071902;GO:0035556;GO:0071900;GO:0072331;GO:0050789;GO:0051340;GO:0051347;GO:0006886;GO:0051348;GO:0002684;GO:…	K04551;K08770;K02977;K02927	RP-S27Ae, RPS27A;RP-L40e, RPL40;UBB;UBC	hsa04137;hsa03320;hsa05012;hsa03010	Mitophagy - animal;PPAR signaling pathway;Parkinson's disease;Ribosome	COG5272	O:Posttranslational modification, protein turnover, chaperones	PF00240.20;PF01599.16;PF11976.5;PF14560.3	ubiquitin;Ribosomal_S27;Rad60-SLD;Ubiquitin_2	Ubiquitin family;Ribosomal protein S27a;Ubiquitin-2 like Rad60 SUMO-like;Ubiquitin-like domain	cytoplasmic	3	67	18	High
Q99707	Methionine synthase OS=Homo sapiens OX=9606 GN=MTR PE=1 SV=2	0.783383	-0.352211	0.02317	down	yes	0.792	1.011	BP:aspartate family amino acid biosynthetic process;BP:regulation of response to stimulus;BP:response to axon injury;BP:signal transduction;BP:small molecule biosynthetic process;BP:organic cyclic compound metabolic process;BP:single-organism metabolic process;BP:single-organism biosynthetic process;BP:response to wounding;BP:biological regulation;BP:water-soluble vitamin metabolic process;BP:vit…	GO:0009067;GO:0048583;GO:0048678;GO:0007165;GO:0044283;GO:1901360;GO:0044710;GO:0044711;GO:0009611;GO:0065007;GO:0006767;GO:0006766;GO:0031103;GO:0031102;GO:0000097;GO:0000096;GO:0043436;GO:0010035;GO:0046483;GO:0009066;GO:1901564;GO:1901566;GO:0016053;GO:0042558;GO:0006555;GO:0033554;GO:0044281;GO:0000302;GO:0006807;GO:0031175;GO:0050789;GO:1901576;GO:0016043;GO:0033013;GO:0071840;GO:0032259;GO:…	K00548	metH, MTR	hsa01230;hsa00450;hsa00270;hsa00670	Biosynthesis of amino acids;Selenocompound metabolism;Cysteine and methionine metabolism;One carbon pool by folate	COG1410;COG0646	E:Amino acid transport and metabolism;	PF02965.14;PF02574.13;PF00809.19;PF02607.14;PF02310.16	Met_synt_B12;S-methyl_trans;Pterin_bind;B12-binding_2;B12-binding	Vitamin B12 dependent methionine synthase, activation domain;Homocysteine S-methyltransferase;Pterin binding enzyme;B12 binding domain;B12 binding domain	cytoplasmic	2	3	140.4	High
Q9NVG8	TBC1 domain family member 13 OS=Homo sapiens OX=9606 GN=TBC1D13 PE=1 SV=3	0.788194	-0.343377	0.001623	down	yes	0.7945	1.008	BP:protein localization;BP:establishment of localization;BP:developmental growth;BP:regulation of transport;BP:regulation of cell projection assembly;BP:multicellular organism growth;BP:regulation of cell projection organization;BP:single-organism metabolic process;BP:single-organism biosynthetic process;BP:animal organ development;BP:positive regulation of molecular function;BP:macromolecule loc…	GO:0008104;GO:0051234;GO:0048589;GO:0051049;GO:0060491;GO:0035264;GO:0031344;GO:0044710;GO:0044711;GO:0048513;GO:0044093;GO:0033036;GO:0045184;GO:0003006;GO:0046337;GO:0046486;GO:1902017;GO:0044702;GO:0044707;GO:0009790;GO:0022604;GO:0022603;GO:0050789;GO:1901576;GO:0043547;GO:0051345;GO:0006886;GO:0065007;GO:0043085;GO:0019637;GO:0065009;GO:0006629;GO:0050793;GO:0050790;GO:0008150;GO:0008152;GO:…	------	------	------	------	COG5210	R:General function prediction only	PF00566.15	RabGAP-TBC	Rab-GTPase-TBC domain	cytoplasmic	2	9	46.5	High
Q9P253	Vacuolar protein sorting-associated protein 18 homolog OS=Homo sapiens OX=9606 GN=VPS18 PE=1 SV=2	0.797109	-0.327152	0.0277	down	yes	0.7995	1.003	BP:protein localization;BP:vesicle docking involved in exocytosis;BP:calcium ion homeostasis;BP:positive regulation of transmembrane transport;BP:regulation of ion transmembrane transport;BP:positive regulation of ion transmembrane transport;BP:cellular component organization or biogenesis;BP:activation of store-operated calcium channel activity;BP:interspecies interaction between organisms;BP:po…	GO:0008104;GO:0006904;GO:0055074;GO:0034764;GO:0034765;GO:0034767;GO:0071840;GO:0032237;GO:0044419;GO:0044093;GO:0051049;GO:0048518;GO:0019725;GO:0051050;GO:0045184;GO:0048278;GO:1904427;GO:0072511;GO:0051701;GO:0051704;GO:0016197;GO:0048878;GO:0046718;GO:0032411;GO:0032412;GO:1904062;GO:1901341;GO:0098771;GO:0006886;GO:0042592;GO:0016043;GO:0006874;GO:0065007;GO:0034762;GO:0065009;GO:0065008;GO:…	K20181	VPS18, PEP3	------	------	------	------	PF05131.11;PF00637.17	Pep3_Vps18;Clathrin	Pep3/Vps18/deep orange family;Region in Clathrin and VPS	cytoplasmic	4	7	110.1	High
O15525	Transcription factor MafG OS=Homo sapiens OX=9606 GN=MAFG PE=1 SV=1	0.797904	-0.325713	6.1e-05	down	yes	0.7995	1.002	BP:regulation of kinase activity;BP:hemostasis;BP:cytokine-mediated signaling pathway;BP:regulation of secretion;BP:regulation of homotypic cell-cell adhesion;BP:regulation of transport;BP:negative regulation of response to stimulus;BP:blood coagulation;BP:regulation of response to stimulus;BP:behavior;BP:regulation of response to cytokine stimulus;BP:signal transduction;BP:cell surface receptor …	GO:0043549;GO:0007599;GO:0019221;GO:0051046;GO:0034110;GO:0051049;GO:0048585;GO:0007596;GO:0048583;GO:0007610;GO:0060759;GO:0007165;GO:0007166;GO:0098771;GO:0019220;GO:0010556;GO:1901362;GO:1901360;GO:0080090;GO:0043200;GO:0051716;GO:0010605;GO:0009968;GO:0045785;GO:0009966;GO:0048869;GO:0070647;GO:0042532;GO:0032446;GO:0030856;GO:0048518;GO:0048519;GO:0030155;GO:0019725;GO:0034112;GO:0044708;GO:…	K09037	MAFF_G_K	------	------	------	------	PF03131.14	bZIP_Maf	bZIP Maf transcription factor	cytoplasmic	1	13	17.8	High
Q86UP2	Kinectin OS=Homo sapiens OX=9606 GN=KTN1 PE=1 SV=1	0.793825	-0.333108	0.004911	down	yes	0.797	1.004	BP:single organismal cell-cell adhesion;BP:adherens junction organization;BP:cell junction organization;BP:metabolic process;BP:macromolecule metabolic process;BP:single-organism process;BP:microtubule-based process;BP:cellular macromolecule metabolic process;BP:organic substance metabolic process;BP:movement of cell or subcellular component;BP:microtubule-based movement;BP:cellular component org…	GO:0016337;GO:0034332;GO:0034330;GO:0008152;GO:0043170;GO:0044699;GO:0007017;GO:0044260;GO:0071704;GO:0006928;GO:0007018;GO:0016043;GO:0071840;GO:0022610;GO:0098602;GO:0044267;GO:0098609;GO:0009987;GO:0006464;GO:0043687;GO:0043412;GO:0036211;GO:0008150;GO:0045216;GO:0007155;GO:0007156;GO:0098742;GO:0044238;GO:0019538;GO:0044237;GO:0044763;GO:0005783;GO:0005788;GO:0005789;GO:0043229;GO:0005887;GO:…	K17975	KTN1	------	------	------	------	------	------	------	ER	33	33	156.2	High
O95425	Supervillin OS=Homo sapiens OX=9606 GN=SVIL PE=1 SV=2	0.776134	-0.365622	0.03313	down	yes	0.787	1.014	BP:regulation of primary metabolic process;BP:regulation of metabolic process;BP:nucleobase-containing compound metabolic process;BP:organic cyclic compound biosynthetic process;BP:negative regulation of macromolecule metabolic process;BP:positive regulation of cell cycle;BP:skeletal muscle tissue development;BP:positive regulation of biological process;BP:negative regulation of biological proces…	GO:0080090;GO:0019222;GO:0006139;GO:1901362;GO:0010605;GO:0045787;GO:0007519;GO:0048518;GO:0048519;GO:0046483;GO:0060255;GO:0007601;GO:0007600;GO:0042752;GO:2001141;GO:0003008;GO:0051781;GO:0019438;GO:0009892;GO:0009890;GO:0009605;GO:0050789;GO:0097659;GO:0090068;GO:0044260;GO:0016043;GO:0065007;GO:0071840;GO:2001222;GO:0018130;GO:0050767;GO:0050793;GO:0009889;GO:0009888;GO:0050953;GO:0050794;GO:…	K10369	SVIL	------	------	------	------	PF00626.19;PF02209.16	Gelsolin;VHP	Gelsolin repeat;Villin headpiece domain	nuclear	5	3	247.6	High
Q9BYC8	39S ribosomal protein L32, mitochondrial OS=Homo sapiens OX=9606 GN=MRPL32 PE=1 SV=1	0.763957	-0.388437	0.02535	down	yes	0.78	1.021	BP:regulation of metabolic process;BP:regulation of response to stimulus;BP:small molecule metabolic process;BP:small molecule catabolic process;BP:enzyme linked receptor protein signaling pathway;BP:organic cyclic compound metabolic process;BP:single-organism catabolic process;BP:single-organism metabolic process;BP:single-organism biosynthetic process;BP:peptide biosynthetic process;BP:peptidyl…	GO:0019222;GO:0048583;GO:0044281;GO:0044282;GO:0007167;GO:1901360;GO:0044712;GO:0044710;GO:0044711;GO:0043043;GO:0018193;GO:0007178;GO:0060255;GO:1901564;GO:0007179;GO:0046483;GO:0044707;GO:0048870;GO:0019538;GO:0016052;GO:0016051;GO:0050789;GO:0007165;GO:0019320;GO:0007166;GO:0006928;GO:0006807;GO:0044267;GO:1901575;GO:0044260;GO:0016043;GO:0065007;GO:0010468;GO:0016477;GO:0019317;GO:0019318;GO:…	K02911	RP-L32, MRPL32, rpmF	hsa03010	Ribosome	COG0333	J:Translation, ribosomal structure and biogenesis	PF01783.20	Ribosomal_L32p	Ribosomal L32p protein family	mitochondrial	1	12	21.4	High
Q9P000	COMM domain-containing protein 9 OS=Homo sapiens OX=9606 GN=COMMD9 PE=1 SV=2	0.792622	-0.335295	0.001749	down	yes	0.795	1.003	BP:regulation of microtubule polymerization or depolymerization;BP:protein localization;BP:regulation of microtubule depolymerization;BP:regulation of primary metabolic process;BP:regulation of metabolic process;BP:regulation of RNA biosynthetic process;BP:membrane budding;BP:membrane organization;BP:establishment of organelle localization;BP:organic cyclic compound biosynthetic process;BP:cellul…	GO:0031110;GO:0008104;GO:0031114;GO:0080090;GO:0019222;GO:2001141;GO:0006900;GO:0061024;GO:0051656;GO:1901362;GO:0071840;GO:0051493;GO:0000920;GO:0044419;GO:0007080;GO:0007088;GO:0009058;GO:0060255;GO:0045184;GO:0002275;GO:1904903;GO:0051704;GO:0016197;GO:0090304;GO:1901673;GO:0016050;GO:0048878;GO:0051783;GO:0002274;GO:0019438;GO:0001919;GO:0070507;GO:0033036;GO:0022607;GO:0034645;GO:0043299;GO:…	------	------	------	------	------	------	PF07258.11	HCaRG	HCaRG protein	cytoplasmic	4	41	21.8	High
A0A087WY96	Transporter OS=Homo sapiens OX=9606 GN=SLC6A6 PE=1 SV=1	0.737911	-0.438481	0.02375	down	yes	0.763	1.034	BP:neurotransmitter transport;BP:carboxylic acid metabolic process;BP:anion transport;BP:nitrogen compound metabolic process;BP:small molecule metabolic process;BP:organic acid transport;BP:single-organism process;BP:single-organism metabolic process;BP:cellular amino acid metabolic process;BP:transmembrane transport;BP:nitrogen compound transport;BP:organic substance metabolic process;BP:transpo…	GO:0006836;GO:0019752;GO:0006820;GO:0006807;GO:0044281;GO:0015849;GO:0044699;GO:0044710;GO:0006520;GO:0055085;GO:0071705;GO:0071704;GO:0006810;GO:0071702;GO:0006865;GO:0006811;GO:0009987;GO:0015711;GO:0015734;GO:0034220;GO:0044765;GO:0044763;GO:0008152;GO:0043436;GO:0051234;GO:0051179;GO:1902578;GO:0046942;GO:0044238;GO:1901564;GO:0006082;GO:0003333;GO:0072348;GO:1903825;GO:0044237;GO:1905039;GO:…	K05039	SLC6A6S	------	------	COG0733	P:Inorganic ion transport and metabolism	PF00209.15	SNF	Sodiu	cytoplasmic	3	5	81.3	High
F5H6I6	Cullin-associated NEDD8-dissociated protein 1 (Fragment) OS=Homo sapiens OX=9606 GN=CAND1 PE=1 SV=1	0.776733	-0.36451	0.005002	down	yes	0.7845	1.01	BP:cellular component assembly;BP:macromolecular complex subunit organization;BP:peptide biosynthetic process;BP:cell differentiation;BP:cellular macromolecule biosynthetic process;BP:organonitrogen compound metabolic process;BP:cellular biosynthetic process;BP:nitrogen compound metabolic process;BP:cellular macromolecular complex assembly;BP:organic substance biosynthetic process;BP:macromolecul…	GO:0022607;GO:0043933;GO:0043043;GO:0030154;GO:0034645;GO:1901564;GO:0044249;GO:0006807;GO:0034622;GO:1901576;GO:0065003;GO:0071840;GO:0071822;GO:0071704;GO:0048869;GO:0070647;GO:0016043;GO:0043086;GO:0032446;GO:0043604;GO:0065007;GO:0044699;GO:0044092;GO:0065009;GO:1901566;GO:0050790;GO:0009059;GO:0032502;GO:0009987;GO:0009058;GO:0044267;GO:0044271;GO:0006461;GO:0006464;GO:0044260;GO:0044767;GO:…	K17263	CAND1	------	------	------	------	------	------	------	cytoplasmic	1	22	6.1	Medium
P50336	Protoporphyrinogen oxidase OS=Homo sapiens OX=9606 GN=PPOX PE=1 SV=1	0.798897	-0.323919	0.000528	down	yes	0.7965	0.997	BP:porphyrin-containing compound metabolic process;BP:porphyrin-containing compound biosynthetic process;BP:organic cyclic compound biosynthetic process;BP:organic cyclic compound metabolic process;BP:single-organism metabolic process;BP:single-organism biosynthetic process;BP:pigment metabolic process;BP:heme biosynthetic process;BP:protoporphyrinogen IX biosynthetic process;BP:protoporphyrinoge…	GO:0006778;GO:0006779;GO:1901362;GO:1901360;GO:0044710;GO:0044711;GO:0042440;GO:0006783;GO:0006782;GO:0046501;GO:0055114;GO:0046483;GO:1901564;GO:1901566;GO:0042493;GO:0006807;GO:1901576;GO:0051186;GO:0051188;GO:0033014;GO:0033013;GO:0018130;GO:0008150;GO:0008152;GO:0019438;GO:0046148;GO:0044271;GO:0050896;GO:0044249;GO:0034641;GO:0044699;GO:0042168;GO:0009987;GO:0006725;GO:0071704;GO:0009058;GO:…	K00231	PPOX, hemY	hsa00860	Porphyrin and chlorophyll metabolism	COG1232	H:Coenzyme transport and metabolism	PF01593.21;PF13450.3;PF01266.21	Amino_oxidase;NAD_binding_8;DAO	Flavin containing amine oxidoreductase;NA;FAD dependent oxidoreductase	mitochondrial	6	24	50.7	High
Q92667	A-kinase anchor protein 1, mitochondrial OS=Homo sapiens OX=9606 GN=AKAP1 PE=1 SV=1	0.778274	-0.36165	0.03101	down	yes	0.7845	1.008	BP:regulation of intracellular protein transport;BP:hemostasis;BP:regulation of primary metabolic process;BP:regulation of metabolic process;BP:regulation of transport;BP:negative regulation of protein dephosphorylation;BP:blood coagulation;BP:regulation of response to stimulus;BP:regulation of phosphate metabolic process;BP:response to purine-containing compound;BP:cellular component organizatio…	GO:0033157;GO:0007599;GO:0080090;GO:0019222;GO:0051049;GO:0035308;GO:0007596;GO:0048583;GO:0019220;GO:0014074;GO:0071840;GO:0051716;GO:0010605;GO:0009966;GO:0048519;GO:0032386;GO:0032387;GO:0051051;GO:0060255;GO:0043434;GO:0042992;GO:0010033;GO:0042990;GO:0044707;GO:0010243;GO:0071320;GO:0050789;GO:0071407;GO:0014741;GO:0014743;GO:0009892;GO:0034645;GO:1903650;GO:0023051;GO:1904589;GO:0051223;GO:…	K16518	AKAP1	------	------	------	------	PF00567.21;PF00013.26	TUDOR;KH_1	Tudor domain;KH domain	ER	6	9	97.3	High
O95630	STAM-binding protein OS=Homo sapiens OX=9606 GN=STAMBP PE=1 SV=1	0.751222	-0.412689	0.02093	down	yes	0.7685	1.023	BP:negative regulation of response to stimulus;BP:regulation of response to stimulus;BP:regulation of neuron apoptotic process;BP:negative regulation of neuron apoptotic process;BP:signal transduction;BP:signal transduction involved in mitotic DNA damage checkpoint;BP:signal transduction involved in mitotic DNA integrity checkpoint;BP:intracellular signal transduction involved in G1 DNA damage ch…	GO:0048585;GO:0048583;GO:0043523;GO:0043524;GO:0007165;GO:1902402;GO:1902403;GO:1902400;GO:1901360;GO:1901361;GO:0051716;GO:2000134;GO:0045787;GO:0009968;GO:0072422;GO:0009966;GO:0070647;GO:0070646;GO:0032446;GO:0048518;GO:0048519;GO:0042127;GO:0051056;GO:0060548;GO:0051058;GO:0072413;GO:0046483;GO:0000910;GO:0019538;GO:0016567;GO:0051865;GO:0033554;GO:0019439;GO:0006807;GO:0061640;GO:0035556;GO:…	K11866	STAMBP, AMSH	hsa04144	Endocytosis	COG1310	R:General function prediction only	PF08969.8;PF01398.18;PF14464.3	USP8_dimer;JAB;Prok-JAB	USP8 dimerisation domain;JAB1/Mov34/MPN/PAD-1 ubiquitin protease;Prokaryotic homologs of the JAB domain	cytoplasmic	2	7	48	High
P48681	Nestin OS=Homo sapiens OX=9606 GN=NES PE=1 SV=2	0.782371	-0.354076	0.02998	down	yes	0.7855	1.004	BP:protein localization;BP:G2/M transition of mitotic cell cycle;BP:regulation of neuron apoptotic process;BP:negative regulation of neuron apoptotic process;BP:cellular component morphogenesis;BP:single-multicellular organism process;BP:cellular component organization or biogenesis;BP:cellular response to stimulus;BP:cellular macromolecule localization;BP:cellular developmental process;BP:positi…	GO:0008104;GO:0000086;GO:0043523;GO:0043524;GO:0032989;GO:0044707;GO:0071840;GO:0051716;GO:0070727;GO:0048869;GO:0051495;GO:0051493;GO:0009612;GO:0045667;GO:0048513;GO:0044092;GO:0048518;GO:0048519;GO:0033036;GO:0045669;GO:0042127;GO:0060548;GO:0007283;GO:0044702;GO:0045108;GO:0009605;GO:1901214;GO:0043069;GO:0010638;GO:0030842;GO:0030844;GO:0033554;GO:0090342;GO:0090343;GO:0048568;GO:1901879;GO:…	K07609	NES	------	------	------	------	PF00038.18	Filament	Intermediate filament protein	cytoplasmic	4	3	177.3	High
Q5T6F2	Ubiquitin-associated protein 2 OS=Homo sapiens OX=9606 GN=UBAP2 PE=1 SV=1	0.767787	-0.381223	0.01653	down	yes	0.777	1.012	BP:metabolic process;BP:regulation of metabolic process;BP:cellular metabolic process;BP:regulation of biological process;BP:positive regulation of metabolic process;BP:positive regulation of macromolecule metabolic process;BP:organic substance metabolic process;BP:protein modification by small protein conjugation or removal;BP:protein modification by small protein conjugation;BP:biological regul…	GO:0008152;GO:0019222;GO:0044237;GO:0050789;GO:0009893;GO:0010604;GO:0071704;GO:0070647;GO:0032446;GO:0065007;GO:0048518;GO:0010468;GO:0044267;GO:0060255;GO:0009987;GO:0006464;GO:0044260;GO:0043412;GO:0036211;GO:0008150;GO:0044238;GO:0019538;GO:0043170;GO:0016567;GO:0010628;GO:0043229;GO:0043228;GO:0043227;GO:0043226;GO:0005737;GO:0044446;GO:0080008;GO:0005813;GO:0005634;GO:0005815;GO:0044430;GO:…	------	------	------	------	------	------	PF12478.5	DUF3697	Ubiquitin-associated protein 2	nuclear	4	5	117	High
Q9UHB6	LIM domain and actin-binding protein 1 OS=Homo sapiens OX=9606 GN=LIMA1 PE=1 SV=1	0.795683	-0.329735	0.003561	down	yes	0.7925	0.996	BP:cellular response to menadione;BP:regulation of actin polymerization or depolymerization;BP:cellular component organization or biogenesis;BP:cellular response to stimulus;BP:negative regulation of cytoskeleton organization;BP:regulation of cytoskeleton organization;BP:negative regulation of biological process;BP:negative regulation of protein depolymerization;BP:response to organic substance;B…	GO:0036245;GO:0008064;GO:0071840;GO:0051716;GO:0051494;GO:0051493;GO:0048519;GO:1901880;GO:0010033;GO:0055114;GO:0065008;GO:0010639;GO:0043242;GO:0032535;GO:0022607;GO:1901879;GO:0050789;GO:0016043;GO:0090066;GO:0065007;GO:0044710;GO:0050794;GO:0008150;GO:0008152;GO:0032956;GO:0050896;GO:0061572;GO:0033043;GO:0051129;GO:0051128;GO:0070887;GO:0043244;GO:0044699;GO:0030030;GO:0031529;GO:0007015;GO:…	------	------	------	------	------	------	PF00412.19	LIM	LIM domain	cytoplasmic	26	44	85.2	High
Q9NVT9	Armadillo repeat-containing protein 1 OS=Homo sapiens OX=9606 GN=ARMC1 PE=1 SV=1	0.79338	-0.333916	0.004796	down	yes	0.791	0.997	BP:carboxylic acid metabolic process;BP:nucleic acid metabolic process;BP:nitrogen compound metabolic process;BP:ncRNA metabolic process;BP:single-organism process;BP:nucleobase-containing compound metabolic process;BP:single-organism metabolic process;BP:cellular macromolecule metabolic process;BP:cellular amino acid metabolic process;BP:amino acid activation;BP:localization;BP:organic substance…	GO:0019752;GO:0090304;GO:0006807;GO:0034660;GO:0044699;GO:0006139;GO:0044710;GO:0044260;GO:0006520;GO:0043038;GO:0051179;GO:0071704;GO:1902578;GO:0044763;GO:0009987;GO:0006812;GO:0006811;GO:0006810;GO:0006725;GO:0044765;GO:0030001;GO:0008152;GO:0043436;GO:0051234;GO:0046483;GO:0016070;GO:0044238;GO:1901564;GO:0006082;GO:0034641;GO:0044237;GO:0043170;GO:0006399;GO:0043039;GO:0006418;GO:0008150;GO:…	K17306	ARMC1	------	------	------	------	------	------	------	cytoplasmic	4	22	31.3	High
Q9Y5K8	V-type proton ATPase subunit D OS=Homo sapiens OX=9606 GN=ATP6V1D PE=1 SV=1	0.792879	-0.334828	0.04923	down	yes	0.7905	0.997	BP:protein localization;BP:regulation of metabolic process;BP:regulation of transport;BP:regulation of response to stimulus;BP:regulation of response to extracellular stimulus;BP:regulation of actin cytoskeleton reorganization;BP:iron ion transport;BP:signal transduction;BP:cell surface receptor signaling pathway;BP:enzyme linked receptor protein signaling pathway;BP:inorganic ion homeostasis;BP:…	GO:0008104;GO:0019222;GO:0051049;GO:0048583;GO:0032104;GO:2000249;GO:0006826;GO:0007165;GO:0007166;GO:0007167;GO:0098771;GO:0007169;GO:0090383;GO:0030100;GO:0071840;GO:0070727;GO:0048869;GO:0051493;GO:0033043;GO:0002366;GO:0048518;GO:0048519;GO:0033036;GO:0019725;GO:0045851;GO:0006818;GO:0045184;GO:0000041;GO:0016192;GO:1903827;GO:0019538;GO:0002274;GO:0016050;GO:0048878;GO:0050789;GO:0009894;GO:…	K02149	ATPeV1D, ATP6M	hsa05120;hsa04966;hsa00190;hsa05323;hsa04721;hsa04145;hsa05110;hsa04150	Epithelial cell signaling in Helicobacter pylori infection;Collecting duct acid secretion;Oxidative phosphorylation;Rheumatoid arthritis;Synaptic vesicle cycle;Phagosome;Vibrio cholerae infection;mTOR signaling pathway	COG1394	C:Energy production and conversion	PF01813.14	ATP-synt_D	ATP synthase subunit D	cytoplasmic	3	21	28.2	High
B0I1T2	Unconventional myosin-Ig OS=Homo sapiens OX=9606 GN=MYO1G PE=1 SV=2	0.792775	-0.335017	0.01246	down	yes	0.79	0.9965	BP:phagocytosis;BP:positive regulation of response to stimulus;BP:regulation of response to stimulus;BP:signal transduction;BP:cell surface receptor signaling pathway;BP:T cell mediated immunity;BP:positive regulation of biological process;BP:biological regulation;BP:cell-substrate adhesion;BP:immune response-activating cell surface receptor signaling pathway;BP:vesicle-mediated transport;BP:cell…	GO:0006909;GO:0048584;GO:0048583;GO:0007165;GO:0007166;GO:0002456;GO:0048518;GO:0065007;GO:0031589;GO:0002429;GO:0016192;GO:0048870;GO:0002376;GO:0006928;GO:0032940;GO:0002764;GO:0002431;GO:0002768;GO:0002433;GO:0006887;GO:0002684;GO:0002682;GO:0016477;GO:0006810;GO:0050794;GO:0072676;GO:0008150;GO:0071976;GO:0051234;GO:0072678;GO:0038096;GO:0046903;GO:0002757;GO:0006897;GO:0038093;GO:0050896;GO:…	K10356	MYO1	------	------	COG5022	Z:Cytoskeleton	PF00063.18;PF06017.10	Myosin_head;Myosin_TH1	Myosin head;Unconventional myosin tail, actin- and lipid-binding	cytoplasmic	13	21	116.4	High
Q15334	Lethal(2) giant larvae protein homolog 1 OS=Homo sapiens OX=9606 GN=LLGL1 PE=1 SV=3	0.794975	-0.331019	0.01201	down	yes	0.791	0.995	BP:regulation of secretion;BP:regulation of transport;BP:regulation of response to stimulus;BP:cellular component organization or biogenesis;BP:regulation of signal transduction;BP:cellular developmental process;BP:positive regulation of molecular function;BP:establishment of spindle orientation;BP:establishment of spindle localization;BP:vesicle-mediated transport;BP:cellular component assembly;…	GO:0051046;GO:0051049;GO:0048583;GO:0071840;GO:0009966;GO:0048869;GO:0044093;GO:0051294;GO:0051293;GO:0016192;GO:0022607;GO:0051223;GO:0050789;GO:0051656;GO:0050708;GO:0043547;GO:0051345;GO:0006887;GO:0016043;GO:0065003;GO:0065007;GO:0043085;GO:0065009;GO:0070201;GO:0050790;GO:0006810;GO:0050794;GO:0008150;GO:0051234;GO:0051336;GO:0006892;GO:0046903;GO:0046907;GO:0030866;GO:0030865;GO:0048812;GO:…	K06094	LLGL	hsa04530;hsa04390	Tight junction;Hippo signaling pathway	------	------	PF08366.10	LLGL	LLGL2	cytoplasmic	3	5	115.3	High
Q9BTT4	Mediator of RNA polymerase II transcription subunit 10 OS=Homo sapiens OX=9606 GN=MED10 PE=1 SV=1	0.760848	-0.39432	0.01051	down	yes	0.7715	1.014	BP:nuclear transport;BP:regulation of primary metabolic process;BP:regulation of metabolic process;BP:organic cyclic compound biosynthetic process;BP:cellular component organization or biogenesis;BP:macromolecular complex assembly;BP:positive regulation of macromolecule metabolic process;BP:ATP-dependent chromatin remodeling;BP:protein modification by small protein conjugation or removal;BP:prote…	GO:0051169;GO:0080090;GO:0019222;GO:1901362;GO:0071840;GO:0065003;GO:0010604;GO:0043044;GO:0070647;GO:0032446;GO:0048518;GO:0060255;GO:0065004;GO:2001141;GO:0046483;GO:0019827;GO:0044707;GO:0019538;GO:0034641;GO:0016567;GO:0019438;GO:0016569;GO:0009893;GO:0009891;GO:0006807;GO:0042981;GO:0050789;GO:0097659;GO:0044267;GO:0044260;GO:0016043;GO:0065007;GO:1901360;GO:0006367;GO:0018130;GO:0006810;GO:…	K15151	MED10, NUT2	------	------	------	------	PF09748.6	Med10	Transcription factor subunit Med10 of Mediator complex	cytoplasmic	2	24	15.7	High
Q8NEY8	Periphilin-1 OS=Homo sapiens OX=9606 GN=PPHLN1 PE=1 SV=2	0.78016	-0.358159	0.02375	down	yes	0.7825	1.003	BP:protein localization;BP:regulation of primary metabolic process;BP:regulation of metabolic process;BP:positive regulation of response to stimulus;BP:regulation of response to stimulus;BP:regulation of Wnt signaling pathway;BP:iron ion transport;BP:signal transduction;BP:cell surface receptor signaling pathway;BP:enzyme linked receptor protein signaling pathway;BP:inorganic ion homeostasis;BP:t…	GO:0008104;GO:0080090;GO:0019222;GO:0048584;GO:0048583;GO:0030111;GO:0006826;GO:0007165;GO:0007166;GO:0007167;GO:0098771;GO:0007169;GO:1901362;GO:1901360;GO:0010605;GO:0009966;GO:0009967;GO:1903506;GO:0048518;GO:0065007;GO:0033036;GO:0019725;GO:0045851;GO:0060255;GO:0045184;GO:2001141;GO:0046483;GO:0010506;GO:0048878;GO:0010629;GO:0019438;GO:0009894;GO:0044707;GO:0009892;GO:0009890;GO:0050789;GO:…	------	------	------	------	------	------	PF11488.5	Lge1	Transcriptional regulatory protein LGE1	cytoplasmic	1	3	52.7	Medium
Q9UPT8	Zinc finger CCCH domain-containing protein 4 OS=Homo sapiens OX=9606 GN=ZC3H4 PE=1 SV=3	0.794162	-0.332495	0.04237	down	yes	0.789	0.9935	BP:regulation of phosphate metabolic process;BP:regulation of primary metabolic process;BP:regulation of metabolic process;BP:positive regulation of response to stimulus;BP:regulation of response to stimulus;BP:activation of protein kinase activity;BP:positive regulation of macromolecule metabolic process;BP:regulation of signal transduction;BP:positive regulation of signal transduction;BP:positi…	GO:0019220;GO:0080090;GO:0019222;GO:0048584;GO:0048583;GO:0032147;GO:0010604;GO:0009966;GO:0009967;GO:0044093;GO:0048518;GO:0060255;GO:0045859;GO:0046330;GO:2001141;GO:0042325;GO:0042327;GO:0016192;GO:0009893;GO:0033674;GO:0046328;GO:0071900;GO:0050789;GO:0051347;GO:0043549;GO:0065007;GO:0065009;GO:0050790;GO:0006810;GO:0009889;GO:0050794;GO:0043410;GO:0008150;GO:1902533;GO:1902531;GO:0080134;GO:…	------	------	------	------	COG5084	R:General function prediction only	PF00642.21	zf-CCCH	Zinc finger C-x8-C-x5-C-x3-H type	nuclear	6	11	140.2	High
P19838	Nuclear factor NF-kappa-B p105 subunit OS=Homo sapiens OX=9606 GN=NFKB1 PE=1 SV=2	0.755665	-0.404181	0.006991	down	yes	0.767	1.015	BP:regulation of transport;BP:regulation of cytokine biosynthetic process;BP:negative regulation of cytokine biosynthetic process;BP:positive regulation of hyaluronan biosynthetic process;BP:cellular response to stimulus;BP:response to external biotic stimulus;BP:MAPK cascade;BP:negative regulation of cell death;BP:heterocycle metabolic process;BP:response to biotic stimulus;BP:response to extern…	GO:0051049;GO:0042035;GO:0042036;GO:1900127;GO:0051716;GO:0043207;GO:0000165;GO:0060548;GO:0046483;GO:0009607;GO:0009605;GO:0019538;GO:0010884;GO:0009892;GO:0009893;GO:0009890;GO:0009891;GO:0090263;GO:0051254;GO:0030177;GO:0035556;GO:0050789;GO:0035994;GO:0051341;GO:0006887;GO:0002684;GO:0070741;GO:0002682;GO:0045913;GO:0018130;GO:0050790;GO:0032481;GO:0016070;GO:0071345;GO:0071347;GO:0035094;GO:…	K02580	NFKB1	hsa04659;hsa04658;hsa05131;hsa05222;hsa05132;hsa05212;hsa05133;hsa04024;hsa05215;hsa05200;hsa05168;hsa04722;hsa04380;hsa04066;hsa04064;hsa04062;hsa04920;hsa05203;hsa05418;hsa01523;hsa05142;hsa05140;hsa05146;hsa05169;hsa05145;hsa04211;hsa04210;hsa05166;hsa04933;hsa05160;hsa05161;hsa05162;hsa05120;hsa05220;hsa05321;hsa05206;hsa04620;hsa04621;hsa04622;hsa04623;hsa04660;hsa05164;hsa04662;hsa04014;hsa…	Th17 cell differentiation;Th1 and Th2 cell differentiation;Shigellosis;Small cell lung cancer;Salmonella infection;Pancreatic cancer;Pertussis;cAMP signaling pathway;Prostate cancer;Pathways in cancer;Herpes simplex infection;Neurotrophin signaling pathway;Osteoclast differentiation;HIF-1 signaling pathway;NF-kappa B signaling pathway;Chemokine signaling pathway;Adipocytokine signaling pathway;Vi…	COG0666	R:General function prediction only	PF00554.19;PF16179.2;PF12796.4;PF13637.3;PF00023.27;PF13857.3;PF00531.19	RHD_DNA_bind;RHD_dimer;Ank_2;Ank_4;Ank;Ank_5;Death	Rel homology DNA-binding domain;Rel homology dimerisation domain;Ankyrin repeats;Ankyrin repeats;Ankyrin repeat;Ankyrin repeats;Death domain	cytoplasmic	5	9	105.3	High
P31483	Nucleolysin TIA-1 isoform p40 OS=Homo sapiens OX=9606 GN=TIA1 PE=1 SV=3	0.771372	-0.374502	0.01728	down	yes	0.776	1.006	BP:protein localization;BP:regulation of primary metabolic process;BP:regulation of metabolic process;BP:regulation of mRNA processing;BP:anion transport;BP:regulation of cytokine biosynthetic process;BP:signal transduction;BP:cell surface receptor signaling pathway;BP:negative regulation of cytokine biosynthetic process;BP:transmembrane receptor protein tyrosine kinase signaling pathway;BP:singl…	GO:0008104;GO:0080090;GO:0019222;GO:0050684;GO:0006820;GO:0042035;GO:0007165;GO:0007166;GO:0042036;GO:0007169;GO:0044712;GO:0044710;GO:0010605;GO:0070727;GO:0010608;GO:0048518;GO:0048519;GO:0015718;GO:0060255;GO:0015849;GO:0015711;GO:0032268;GO:0043068;GO:0032309;GO:0009892;GO:0009890;GO:0007167;GO:0046717;GO:0042981;GO:0015908;GO:1901575;GO:1901571;GO:0001817;GO:0016042;GO:0065007;GO:1904037;GO:…	K13201	TIA1, TIAL1	------	------	------	------	PF00076.19;PF16842.2;PF14605.3	RRM_1;RRM_occluded;Nup35_RRM_2	RNA recognition motif.;Occluded RNA-recognition motif;Nup53/35/40-type RNA recognition motif	cytoplasmic	2	11	42.9	High
O75817	Ribonuclease P protein subunit p20 OS=Homo sapiens OX=9606 GN=POP7 PE=1 SV=2	0.797277	-0.326847	0.02393	down	yes	0.7905	0.9915	BP:regulation of phosphate metabolic process;BP:regulation of primary metabolic process;BP:regulation of metabolic process;BP:signal transduction;BP:organic cyclic compound metabolic process;BP:positive regulation of macromolecule metabolic process;BP:positive regulation of biological process;BP:heterocycle metabolic process;BP:regulation of phosphorylation;BP:ncRNA processing;BP:regulation of ma…	GO:0019220;GO:0080090;GO:0019222;GO:0007165;GO:1901360;GO:0010604;GO:0048518;GO:0046483;GO:0042325;GO:0034470;GO:0060255;GO:0042493;GO:0042327;GO:0009893;GO:0006807;GO:0034660;GO:0035556;GO:0050789;GO:0044260;GO:0001682;GO:0065007;GO:0050794;GO:0008150;GO:0008152;GO:0016070;GO:0050896;GO:0031401;GO:0044767;GO:0090501;GO:0034641;GO:0009653;GO:0044699;GO:0006139;GO:0010562;GO:0051246;GO:0051247;GO:…	K14527	RPP20, POP7	hsa03008;hsa03013	Ribosome biogenesis in eukaryotes;RNA transport	------	------	PF12328.5;PF01918.18	Rpp20;Alba	Rpp20 subunit of nuclear RNase MRP and P;Alba	cytoplasmic	2	24	15.6	High
Q96ST2	Protein IWS1 homolog OS=Homo sapiens OX=9606 GN=IWS1 PE=1 SV=2	0.743879	-0.426861	0.02597	down	yes	0.7595	1.021	BP:regulation of primary metabolic process;BP:regulation of metabolic process;BP:regulation of transport;BP:regulation of intracellular transport;BP:regulation of histone modification;BP:organic cyclic compound biosynthetic process;BP:organic cyclic compound metabolic process;BP:regulation of histone acetylation;BP:regulation of nucleobase-containing compound transport;BP:regulation of mRNA proce…	GO:0080090;GO:0019222;GO:0051049;GO:0032386;GO:0031056;GO:1901362;GO:1901360;GO:0035065;GO:0032239;GO:0050684;GO:0060255;GO:0032784;GO:0031060;GO:2001141;GO:0046483;GO:0019438;GO:0006807;GO:0051028;GO:0050789;GO:0097659;GO:1901576;GO:0044260;GO:0065007;GO:0006366;GO:0006368;GO:0018130;GO:1903649;GO:0006810;GO:0009889;GO:0050794;GO:0010793;GO:1901983;GO:0008152;GO:0034654;GO:0051236;GO:0051234;GO:…	K17498	SPN1, IWS1	------	------	COG5139	S:Function unknown	PF08711.8	Med26	TFIIS helical bundle-like domain	cytoplasmic	2	4	91.9	High
Q9BUK6	Protein misato homolog 1 OS=Homo sapiens OX=9606 GN=MSTO1 PE=1 SV=1	0.78089	-0.356808	0.01767	down	yes	0.7805	0.9995	BP:organelle localization;BP:mitochondrion organization;BP:single-organism process;BP:cellular component organization;BP:cellular component organization or biogenesis;BP:mitochondrion distribution;BP:cellular process;BP:biological_process;BP:mitochondrion localization;BP:localization;BP:single-organism localization;BP:cellular localization;BP:organelle organization;BP:single-organism organelle or…	GO:0051640;GO:0007005;GO:0044699;GO:0016043;GO:0071840;GO:0048311;GO:0009987;GO:0008150;GO:0051646;GO:0051179;GO:1902578;GO:0051641;GO:0006996;GO:1902589;GO:0044763;GO:1902580;GO:0031968;GO:0031970;GO:0031974;GO:0019867;GO:0043229;GO:0005739;GO:0043227;GO:0043226;GO:0005737;GO:0044446;GO:0031090;GO:0098805;GO:0016020;GO:0044444;GO:0005758;GO:0098588;GO:0031966;GO:0043231;GO:0044464;GO:0005575;GO:…	------	------	------	------	------	------	PF10644.6;PF14881.3;PF00091.22	Misat_Tub_SegII;Tubulin_3;Tubulin	Misato Segment II tubulin-like domain;Tubulin domain;Tubulin/FtsZ family, GTPase domain	cytoplasmic	1	4	61.8	High
Q8NHH9	Atlastin-2 OS=Homo sapiens OX=9606 GN=ATL2 PE=1 SV=2	0.787544	-0.344568	0.006119	down	yes	0.784	0.9955	BP:membrane organization;BP:cellular component organization or biogenesis;BP:peptidyl-amino acid modification;BP:vesicle-mediated transport;BP:protein metabolic process;BP:peptidyl-glutamic acid modification;BP:cellular component assembly;BP:cellular protein metabolic process;BP:ER to Golgi vesicle-mediated transport;BP:cellular macromolecule metabolic process;BP:cellular component organization;B…	GO:0061024;GO:0071840;GO:0018193;GO:0016192;GO:0019538;GO:0018200;GO:0022607;GO:0044267;GO:0006888;GO:0044260;GO:0016043;GO:0065003;GO:0044699;GO:0006810;GO:0043412;GO:0036211;GO:0008150;GO:0008152;GO:0051234;GO:0018095;GO:0046907;GO:1990809;GO:0044802;GO:0090158;GO:0051013;GO:0009987;GO:0051259;GO:0007030;GO:0043170;GO:0043933;GO:0071786;GO:0071822;GO:0007029;GO:0051260;GO:0071704;GO:0048193;GO:…	K17339	ATL	------	------	------	------	PF02263.16;PF02841.11	GBP;GBP_C	Guanylate-binding protein, N-terminal domain;Guanylate-binding protein, C-terminal domain	cytoplasmic	7	20	66.2	High
O43663	Protein regulator of cytokinesis 1 OS=Homo sapiens OX=9606 GN=PRC1 PE=1 SV=2	0.784353	-0.350425	0.000216	down	yes	0.782	0.997	BP:protein localization;BP:cellular component organization or biogenesis;BP:positive regulation of cell cycle;BP:cellular macromolecule localization;BP:positive regulation of biological process;BP:macromolecule localization;BP:regulation of cell proliferation;BP:cytokinesis;BP:heterocycle metabolic process;BP:mRNA splicing, via spliceosome;BP:microtubule cytoskeleton organization;BP:mitotic spind…	GO:0008104;GO:0071840;GO:0045787;GO:0070727;GO:0048518;GO:0033036;GO:0042127;GO:0000910;GO:0046483;GO:0000398;GO:0000226;GO:0000022;GO:0050789;GO:0090068;GO:0007346;GO:0044260;GO:0016043;GO:0065007;GO:0050794;GO:1901987;GO:0008150;GO:0008152;GO:0051231;GO:1901989;GO:0016070;GO:0016071;GO:0001578;GO:0034641;GO:1901990;GO:1901992;GO:0044699;GO:0006139;GO:0010564;GO:0008380;GO:0008284;GO:0009987;GO:…	K16732	PRC1	------	------	------	------	PF03999.9	MAP65_ASE1	Microtubule associated protein	cytoplasmic	8	18	71.6	High
P51784	Ubiquitin carboxyl-terminal hydrolase 11 OS=Homo sapiens OX=9606 GN=USP11 PE=1 SV=3	0.793643	-0.333438	0.005061	down	yes	0.7865	0.991	BP:regulation of primary metabolic process;BP:regulation of metabolic process;BP:organic cyclic compound biosynthetic process;BP:organic cyclic compound metabolic process;BP:protein modification by small protein conjugation or removal;BP:protein modification by small protein removal;BP:biological regulation;BP:regulation of macromolecule metabolic process;BP:regulation of RNA biosynthetic process…	GO:0080090;GO:0019222;GO:1901362;GO:1901360;GO:0070647;GO:0070646;GO:0065007;GO:0060255;GO:2001141;GO:1903706;GO:1903707;GO:0046483;GO:0044707;GO:0019538;GO:0019438;GO:0050789;GO:0097659;GO:1901576;GO:1901575;GO:0044265;GO:0044260;GO:0002682;GO:0002683;GO:0016579;GO:0018130;GO:0050793;GO:0009889;GO:0050794;GO:0043412;GO:0036211;GO:0008150;GO:0008152;GO:0034654;GO:0016070;GO:0051603;GO:0044271;GO:…	K11835	USP4_11, UBP12	------	------	COG5560	O:Posttranslational modification, protein turnover, chaperones	PF00443.26;PF06337.9;PF13423.3;PF14836.3;PF14533.3	UCH;DUSP;UCH_1;Ubiquitin_3;USP7_C2	Ubiquitin carboxyl-terminal hydrolase;DUSP domain;Ubiquitin carboxyl-terminal hydrolase;Ubiquitin-like domain;Ubiquitin-specific protease C-terminal	cytoplasmic	1	2	109.7	Medium
P41440	Reduced folate transporter OS=Homo sapiens OX=9606 GN=SLC19A1 PE=1 SV=3	0.734863	-0.444452	0.04896	down	yes	0.7525	1.024	BP:anion transport;BP:small molecule metabolic process;BP:organic cyclic compound metabolic process;BP:single-organism metabolic process;BP:methotrexate transport;BP:multi-organism process;BP:water-soluble vitamin metabolic process;BP:vitamin metabolic process;BP:folic acid-containing compound metabolic process;BP:organic acid transport;BP:organic substance transport;BP:organic anion transport;BP…	GO:0006820;GO:0044281;GO:1901360;GO:0044710;GO:0051958;GO:0051704;GO:0006767;GO:0006766;GO:0006760;GO:0015849;GO:0071702;GO:0015711;GO:0006835;GO:0043436;GO:0046483;GO:0043648;GO:0044703;GO:1901564;GO:0006575;GO:0002275;GO:0044706;GO:0002376;GO:0015884;GO:0007565;GO:0002274;GO:0045321;GO:0032940;GO:0006807;GO:0072337;GO:0046655;GO:0051186;GO:0051181;GO:0051180;GO:0006887;GO:0042558;GO:0045055;GO:…	K14609	SLC19A1, RFC1	hsa01523;hsa04977	Antifolate resistance;Vitamin digestion and absorption	------	------	PF01770.15	Folate_carrier	Reduced folate carrier	cytoplasmic	1	5	64.8	High
O95721	Synaptosomal-associated protein 29 OS=Homo sapiens OX=9606 GN=SNAP29 PE=1 SV=1	0.796259	-0.328691	0.03238	down	yes	0.7875	0.989	BP:protein localization;BP:regulation of stem cell differentiation;BP:negative regulation of stem cell differentiation;BP:regulation of metabolic process;BP:positive regulation of stem cell differentiation;BP:vesicle fusion;BP:nucleobase-containing compound metabolic process;BP:vesicle targeting;BP:membrane fusion;BP:membrane organization;BP:regulation of phosphate metabolic process;BP:organic cy…	GO:0008104;GO:2000736;GO:2000737;GO:0019222;GO:2000738;GO:0006906;GO:0006139;GO:0006903;GO:0061025;GO:0061024;GO:0019220;GO:1901362;GO:0071840;GO:0080090;GO:0051196;GO:0070873;GO:0010604;GO:0048869;GO:0044801;GO:0002252;GO:2000035;GO:0010720;GO:2000036;GO:0048518;GO:0048519;GO:0097576;GO:0006367;GO:0007033;GO:0060255;GO:0051194;GO:0000083;GO:0045184;GO:2001141;GO:0045026;GO:0031329;GO:0070875;GO:…	K08509	SNAP29	hsa04140;hsa04130	Autophagy - animal;SNARE interactions in vesicular transport	------	------	------	------	------	cytoplasmic	3	15	29	High
Q8N201	Integrator complex subunit 1 OS=Homo sapiens OX=9606 GN=INTS1 PE=1 SV=2	0.781627	-0.355449	0.004749	down	yes	0.7785	0.996	BP:behavior;BP:organic cyclic compound biosynthetic process;BP:cellular component organization or biogenesis;BP:snRNA processing;BP:organic substance metabolic process;BP:U2 snRNA 3'-end processing;BP:ncRNA processing;BP:snRNA 3'-end processing;BP:sensory perception of sound;BP:sensory perception;BP:cell-cell adhesion via plasma-membrane adhesion molecules;BP:system process;BP:aromatic compound b…	GO:0007610;GO:1901362;GO:0071840;GO:0016180;GO:0071704;GO:0034474;GO:0034470;GO:0034472;GO:0007605;GO:0007600;GO:0098742;GO:0003008;GO:0019438;GO:0006807;GO:0034660;GO:0097659;GO:1901576;GO:0044260;GO:0046483;GO:0016043;GO:1901360;GO:0006366;GO:0018130;GO:0007626;GO:0098609;GO:0050954;GO:0009301;GO:0008150;GO:0008152;GO:0034654;GO:0016070;GO:0016073;GO:0044271;GO:0006351;GO:0032774;GO:0043628;GO:…	K13138	INTS1	------	------	------	------	PF12432.5	DUF3677	Protein of unknown function	cytoplasmic	6	4	244.1	High
Q14558	Phosphoribosyl pyrophosphate synthase-associated protein 1 OS=Homo sapiens OX=9606 GN=PRPSAP1 PE=1 SV=2	0.770459	-0.37621	0.002786	down	yes	0.772	1.002	BP:negative regulation of kinase activity;BP:negative regulation of transferase activity;BP:regulation of phosphate metabolic process;BP:regulation of metabolic process;BP:negative regulation of cellular metabolic process;BP:regulation of cellular metabolic process;BP:cellular biosynthetic process;BP:cellular nitrogen compound metabolic process;BP:nitrogen compound metabolic process;BP:regulation…	GO:0033673;GO:0051348;GO:0019220;GO:0019222;GO:0031324;GO:0031323;GO:0044249;GO:0034641;GO:0006807;GO:0051338;GO:0009892;GO:1901362;GO:0050789;GO:1901360;GO:0006139;GO:0044710;GO:0044711;GO:0043549;GO:0043086;GO:0071704;GO:0065007;GO:0044699;GO:0044092;GO:0048519;GO:0065009;GO:0044281;GO:0018130;GO:0006793;GO:0042325;GO:0050790;GO:0045936;GO:0009987;GO:0006725;GO:0050794;GO:0051174;GO:0009058;GO:…	------	------	------	------	COG0462	F:Nucleotide transport and metabolism	PF14572.3;PF13793.3;PF00156.24	Pribosyl_synth;Pribosyltran_N;Pribosyltran	Phosphoribosyl synthetase-associated domain;N-terminal domain of ribose phosphate pyrophosphokinase;Phosphoribosyl transferase domain	cytoplasmic	5	29	39.4	High
Q8N9A8	Nuclear envelope phosphatase-regulatory subunit 1 OS=Homo sapiens OX=9606 GN=CNEP1R1 PE=1 SV=1	0.749507	-0.415986	0.045	down	yes	0.76	1.014	BP:protein localization;BP:regulation of phosphate metabolic process;BP:regulation of primary metabolic process;BP:regulation of metabolic process;BP:membrane organization;BP:cellular component organization or biogenesis;BP:single-organism metabolic process;BP:positive regulation of macromolecule metabolic process;BP:cellular macromolecule localization;BP:cellular developmental process;BP:positiv…	GO:0008104;GO:0019220;GO:0080090;GO:0019222;GO:0061024;GO:0071840;GO:0044710;GO:0010604;GO:0070727;GO:0048869;GO:0045834;GO:0048518;GO:0033036;GO:0060255;GO:0007077;GO:0009893;GO:0009891;GO:0050789;GO:0010867;GO:0010866;GO:0016043;GO:0065007;GO:0006629;GO:0009889;GO:0050794;GO:0044802;GO:0008152;GO:0035303;GO:0035304;GO:0035307;GO:0035306;GO:0051174;GO:0031401;GO:0008150;GO:0010562;GO:0090208;GO:…	------	------	------	------	------	------	PF09771.6	Tmemb_18A	Transmembrane protein 188	peroxisomal	1	12	14.3	High
Q96A46	Mitoferrin-2 OS=Homo sapiens OX=9606 GN=SLC25A28 PE=2 SV=1	0.729045	-0.455921	0.009087	down	yes	0.748	1.026	BP:iron ion homeostasis;BP:iron ion transport;BP:signal transduction;BP:transition metal ion homeostasis;BP:inorganic ion homeostasis;BP:peptide biosynthetic process;BP:protein modification by small protein conjugation;BP:mitochondrial transport;BP:organonitrogen compound metabolic process;BP:organonitrogen compound biosynthetic process;BP:protein metabolic process;BP:chemical homeostasis;BP:regu…	GO:0055072;GO:0006826;GO:0007165;GO:0055076;GO:0098771;GO:0043043;GO:0032446;GO:0006839;GO:1901564;GO:1901566;GO:0019538;GO:0048878;GO:0050789;GO:0016567;GO:0006807;GO:0035556;GO:0044267;GO:0044260;GO:0065007;GO:0044699;GO:0065008;GO:0006812;GO:0006811;GO:0006810;GO:0050794;GO:0043412;GO:0036211;GO:0008150;GO:0008152;GO:0051234;GO:0044271;GO:0046907;GO:0009058;GO:0048250;GO:0006518;GO:0070647;GO:…	K15113	SLC25A28_37, MFRN	------	------	------	------	PF00153.24	Mito_carr	Mitochondrial carrier protein	cytoplasmic	1	4	39.2	High
E9PJD7	Cysteine and histidine-rich protein 1 OS=Homo sapiens OX=9606 GN=CYHR1 PE=1 SV=1	0.755446	-0.4046	0.04759	down	yes	0.763	1.01	BP:biological_process;BP:transport;BP:establishment of localization;BP:localization;CC:intracellular organelle part;CC:cellular_component;CC:integral component of membrane;CC:cell part;CC:nucleoplasm;CC:nuclear part;CC:intrinsic component of membrane;CC:intracellular part;CC:membrane part;CC:organelle part;MF:binding;MF:molecular_function;MF:metal ion binding;MF:transition metal ion binding;MF:ca…	GO:0008150;GO:0006810;GO:0051234;GO:0051179;GO:0044446;GO:0005575;GO:0016021;GO:0044464;GO:0005654;GO:0044428;GO:0031224;GO:0044424;GO:0044425;GO:0044422;GO:0005488;GO:0003674;GO:0046872;GO:0046914;GO:0043169;GO:0043167;GO:0008270	------	------	------	------	------	------	PF13920.3	zf-C3HC4_3	Zinc finger, C3HC4 type	cytoplasmic	1	4	43.8	High
Q8WWZ8	Oncoprotein-induced transcript 3 protein OS=Homo sapiens OX=9606 GN=OIT3 PE=1 SV=2	0.77722	-0.363605	0.01126	down	yes	0.7745	0.9965	BP:cellular component organization or biogenesis;BP:biological regulation;BP:macromolecular complex remodeling;BP:protein-lipid complex remodeling;BP:plasma lipoprotein particle remodeling;BP:reverse cholesterol transport;BP:single-multicellular organism process;BP:chemical homeostasis;BP:high-density lipoprotein particle remodeling;BP:sterol transport;BP:organic hydroxy compound transport;BP:cel…	GO:0071840;GO:0065007;GO:0034367;GO:0034368;GO:0034369;GO:0043691;GO:0044707;GO:0048878;GO:0034375;GO:0015918;GO:0015850;GO:0016043;GO:0044699;GO:0065008;GO:0050793;GO:0006810;GO:0050794;GO:0008150;GO:0051234;GO:0006869;GO:0030301;GO:0032501;GO:0009987;GO:0045596;GO:0045595;GO:0048519;GO:0055085;GO:0051093;GO:0043933;GO:0042592;GO:0071825;GO:0071827;GO:0050789;GO:0071702;GO:0010745;GO:0010743;GO:…	------	------	------	------	------	------	PF00100.20;PF14670.3;PF12662.4	Zona_pellucida;FXa_inhibition;cEGF	Zona pellucida-like domain;Coagulation Factor Xa inhibitory site;Complement Clr-like EGF-like	extracellular	1	1	60	Medium
P09471	Guanine nucleotide-binding protein G(o) subunit alpha OS=Homo sapiens OX=9606 GN=GNAO1 PE=1 SV=4	0.774436	-0.368782	0.02544	down	yes	0.7725	0.9975	BP:regulation of phosphate metabolic process;BP:regulation of primary metabolic process;BP:regulation of metabolic process;BP:regulation of transport;BP:organic substance catabolic process;BP:muscle system process;BP:circulatory system process;BP:cell surface receptor signaling pathway;BP:cellular component organization or biogenesis;BP:hormone metabolic process;BP:hormone catabolic process;BP:ne…	GO:0019220;GO:0080090;GO:0019222;GO:0051049;GO:1901575;GO:0003012;GO:0003013;GO:0007166;GO:0071840;GO:0042445;GO:0042447;GO:0010605;GO:0010604;GO:0071704;GO:0010608;GO:0001822;GO:0048513;GO:0010959;GO:0044093;GO:0044092;GO:0048518;GO:0048519;GO:0042127;GO:0042325;GO:0015718;GO:0006936;GO:0045859;GO:0042327;GO:0007283;GO:0007610;GO:0014072;GO:0046717;GO:0009887;GO:0001990;GO:1903706;GO:0010033;GO:…	K04534	GNAO, G-ALPHA-O	hsa05032;hsa05034;hsa04921;hsa04915;hsa04723;hsa05142;hsa04916;hsa04015;hsa04725;hsa04724;hsa04727;hsa04726;hsa04728;hsa04713;hsa05145;hsa04730	Morphine addiction;Alcoholism;Oxytocin signaling pathway;Estrogen signaling pathway;Retrograde endocannabinoid signaling;Chagas diseas;Melanogenesis;Rap1 signaling pathway;Cholinergic synapse;Glutamatergic synapse;GABAergic synapse;Serotonergic synapse;Dopaminergic synapse;Circadian entrainment;Toxoplasmosis;Long-term depression	------	------	PF00503.17;PF00025.18	G-alpha;Arf	G-protein alpha subunit;ADP-ribosylation factor family	cytoplasmic	1	11	40	High
Q969T4	Ubiquitin-conjugating enzyme E2 E3 OS=Homo sapiens OX=9606 GN=UBE2E3 PE=1 SV=1	0.72179	-0.470349	0.01041	down	yes	0.742	1.028	BP:protein localization;BP:protein K48-linked ubiquitination;BP:protein modification by small protein conjugation or removal;BP:protein modification by small protein conjugation;BP:macromolecule localization;BP:protein K63-linked ubiquitination;BP:establishment of protein localization;BP:protein metabolic process;BP:protein ubiquitination;BP:regulation of biological process;BP:cellular protein me…	GO:0008104;GO:0070936;GO:0070647;GO:0032446;GO:0033036;GO:0070534;GO:0045184;GO:0019538;GO:0016567;GO:0050789;GO:0044267;GO:0044260;GO:0065007;GO:0006810;GO:0043412;GO:0036211;GO:0008150;GO:0051234;GO:0008152;GO:0000209;GO:0070979;GO:0051179;GO:0009987;GO:0043170;GO:0040008;GO:0071704;GO:0071702;GO:0006464;GO:0044238;GO:0044237;GO:0015031;GO:0044437;GO:0031901;GO:0098588;GO:0043231;GO:0005829;GO:…	K20217	UBE2E	hsa04120	Ubiquitin mediated proteolysis	COG5078	O:Posttranslational modification, protein turnover, chaperones	PF00179.23	UQ_con	Ubiquitin-conjugating enzyme	cytoplasmic	1	4	22.9	Medium
O75683	Surfeit locus protein 6 OS=Homo sapiens OX=9606 GN=SURF6 PE=1 SV=3	0.798272	-0.325047	0.01485	down	yes	0.7855	0.984	BP:cellular component organization or biogenesis;BP:ribosomal large subunit biogenesis;BP:ribosomal small subunit biogenesis;BP:ribosome biogenesis;BP:ribonucleoprotein complex biogenesis;BP:biological_process;BP:cellular component biogenesis;CC:large ribosomal subunit;CC:cytosolic large ribosomal subunit;CC:ribonucleoprotein complex;CC:intracellular organelle;CC:non-membrane-bounded organelle;CC…	GO:0071840;GO:0042273;GO:0042274;GO:0042254;GO:0022613;GO:0008150;GO:0044085;GO:0015934;GO:0022625;GO:1990904;GO:0043229;GO:0043228;GO:0043227;GO:0043226;GO:0005575;GO:0005634;GO:0030529;GO:0005654;GO:0044445;GO:0044452;GO:0044391;GO:0001652;GO:0032991;GO:0043231;GO:0043232;GO:0005730;GO:0044464;GO:0044446;GO:0044444;GO:0044428;GO:0044424;GO:0044422;GO:1901363;GO:0003674;GO:0005488;GO:0003676;GO:…	------	------	------	------	------	------	PF04935.9	SURF6	Surfeit locus protein 6	nuclear	8	29	41.4	High
Q9Y2S6	Translation machinery-associated protein 7 OS=Homo sapiens OX=9606 GN=TMA7 PE=1 SV=1	0.750495	-0.414086	0.04291	down	yes	0.758	1.01	BP:cell cycle process;BP:single-organism process;BP:cellular response to stimulus;BP:DNA integrity checkpoint;BP:biological_process;BP:cellular process;BP:cellular response to DNA damage stimulus;BP:response to stress;BP:single-organism cellular process;BP:DNA damage checkpoint;BP:cell cycle checkpoint;BP:response to stimulus;BP:cellular response to stress;CC:integral component of membrane;CC:int…	GO:0022402;GO:0044699;GO:0051716;GO:0031570;GO:0008150;GO:0009987;GO:0006974;GO:0006950;GO:0044763;GO:0000077;GO:0000075;GO:0050896;GO:0033554;GO:0016021;GO:0031224;GO:0044425;GO:0005575;GO:0005488;GO:0003676;GO:1901363;GO:0097159;GO:0003674	------	------	------	------	------	------	PF09072.7	TMA7	Translation machinery associated TMA7	cytoplasmic	1	23	7.1	High
Q13643	Four and a half LIM domains protein 3 OS=Homo sapiens OX=9606 GN=FHL3 PE=1 SV=4	0.784848	-0.349514	0.007087	down	yes	0.777	0.99	BP:regulation of transport;BP:regulation of homeostatic process;BP:regulation of ion transmembrane transport;BP:cellular component organization or biogenesis;BP:muscle organ development;BP:negative regulation of G1/S transition of mitotic cell cycle;BP:cellular developmental process;BP:animal organ development;BP:positive regulation of biological process;BP:negative regulation of biological proce…	GO:0051049;GO:0032844;GO:0034765;GO:0071840;GO:0007517;GO:2000134;GO:0048869;GO:0048513;GO:0048518;GO:0048519;GO:0051050;GO:0010972;GO:1901379;GO:0042391;GO:0032412;GO:1904062;GO:0007346;GO:0016043;GO:0065007;GO:0065009;GO:0065008;GO:0009887;GO:0050794;GO:1901987;GO:0008150;GO:0045786;GO:1901988;GO:0044767;GO:0022898;GO:0030308;GO:0030154;GO:0051128;GO:1901991;GO:1901990;GO:0061061;GO:0009653;GO:…	------	------	------	------	------	------	PF00412.19	LIM	LIM domain	cytoplasmic	4	21	31.2	High
Q6ZNB6	NF-X1-type zinc finger protein NFXL1 OS=Homo sapiens OX=9606 GN=NFXL1 PE=1 SV=2	0.79482	-0.3313	0.03486	down	yes	0.7825	0.9845	BP:regulation of primary metabolic process;BP:regulation of metabolic process;BP:organic cyclic compound biosynthetic process;BP:organic cyclic compound metabolic process;BP:single-organism metabolic process;BP:negative regulation of macromolecule metabolic process;BP:negative regulation of biological process;BP:DNA repair;BP:regulation of macromolecule metabolic process;BP:regulation of RNA bios…	GO:0080090;GO:0019222;GO:1901362;GO:1901360;GO:0044710;GO:0010605;GO:0048519;GO:0006281;GO:0060255;GO:2001141;GO:0046483;GO:0000012;GO:0033554;GO:0009892;GO:0009890;GO:0010629;GO:0006807;GO:0050789;GO:0097659;GO:1901576;GO:0044260;GO:0065007;GO:0006366;GO:0018130;GO:0009889;GO:0051716;GO:0050794;GO:0006950;GO:0008150;GO:0008152;GO:0019438;GO:0034654;GO:0016070;GO:0044271;GO:0050896;GO:0006355;GO:…	K15683	NFXL1, OZFP	------	------	------	------	PF01422.14	zf-NF-X1	NF-X1 type zinc finger	nuclear	4	7	101.3	High
A0A140T8X7	Lysosomal thioesterase PPT2 OS=Homo sapiens OX=9606 GN=PPT2 PE=1 SV=1	0.798473	-0.324684	0.03456	down	yes	0.7845	0.9825	BP:coenzyme biosynthetic process;BP:regulation of phosphate metabolic process;BP:regulation of metabolic process;BP:coenzyme metabolic process;BP:regulation of cellular metabolic process;BP:macromolecule depalmitoylation;BP:cellular metabolic process;BP:macromolecule deacylation;BP:acyl-CoA metabolic process;BP:long-chain fatty-acyl-CoA metabolic process;BP:regulation of primary metabolic process…	GO:0009108;GO:0019220;GO:0019222;GO:0006732;GO:0031323;GO:0098734;GO:0044237;GO:0098732;GO:0006637;GO:0035336;GO:0080090;GO:0043549;GO:0051246;GO:0051188;GO:0050789;GO:0071704;GO:0031399;GO:0065007;GO:0065009;GO:0071616;GO:0035383;GO:0050790;GO:0035384;GO:0060255;GO:0045859;GO:0050794;GO:0051174;GO:0043412;GO:0051186;GO:0008150;GO:0008152;GO:0042325;GO:0032268;GO:1901576;GO:0046949;GO:0009058;GO:…	K01074	PPT	hsa00062;hsa04142;hsa01212	Fatty acid elongation;Lysosome;Fatty acid metabolism	COG1075	R:General function prediction only	PF02089.12;PF00561.17	Palm_thioest;Abhydrolase_1	Palmitoyl protein thioesterase;alpha/beta hydrolase fold	lysosomal	2	10	34.9	High
Q8NC44	Reticulophagy regulator 2 OS=Homo sapiens OX=9606 GN=RETREG2 PE=1 SV=3	0.786039	-0.347326	0.01005	down	yes	0.777	0.9885	BP:negative regulation of metabolic process;BP:negative regulation of phosphorus metabolic process;BP:regulation of phosphate metabolic process;BP:regulation of primary metabolic process;BP:regulation of metabolic process;BP:negative regulation of response to stimulus;BP:negative regulation of cellular metabolic process;BP:regulation of cellular metabolic process;BP:regulation of biological proce…	GO:0009892;GO:0010563;GO:0019220;GO:0080090;GO:0019222;GO:0048585;GO:0031324;GO:0031323;GO:0050789;GO:0035690;GO:0070887;GO:0023051;GO:0031400;GO:0032268;GO:0043408;GO:0051716;GO:1902531;GO:0010605;GO:0009968;GO:0010646;GO:0009966;GO:0051246;GO:0065007;GO:0043409;GO:0031399;GO:0048519;GO:0065008;GO:0045936;GO:0060255;GO:0048583;GO:0009987;GO:0051248;GO:0050794;GO:0051174;GO:0042326;GO:0008150;GO:…	------	------	------	------	------	------	------	------	------	plasma membrane	5	19	57.8	High
Q9H3Z4	DnaJ homolog subfamily C member 5 OS=Homo sapiens OX=9606 GN=DNAJC5 PE=1 SV=1	0.795119	-0.330756	0.008588	down	yes	0.782	0.9835	BP:signal release from synapse;BP:negative regulation of neuron apoptotic process;BP:establishment of organelle localization;BP:cellular developmental process;BP:animal organ development;BP:negative regulation of biological process;BP:synaptic vesicle localization;BP:negative regulation of cell death;BP:myeloid cell activation involved in immune response;BP:establishment of synaptic vesicle local…	GO:0099643;GO:0043524;GO:0051656;GO:0048869;GO:0048513;GO:0048519;GO:0097479;GO:0060548;GO:0002275;GO:0097480;GO:0016192;GO:0002274;GO:0002376;GO:0043523;GO:0045321;GO:0050789;GO:0048489;GO:0002283;GO:0006887;GO:0045055;GO:0065007;GO:0006810;GO:0050794;GO:0001775;GO:0008150;GO:1901214;GO:0051234;GO:0046903;GO:0046907;GO:0016079;GO:0043312;GO:0099531;GO:0002263;GO:0031017;GO:0051649;GO:0044699;GO:…	K09525	DNAJC5	hsa04141	Protein processing in endoplasmic reticulum	COG0484	O:Posttranslational modification, protein turnover, chaperones	PF00226.28	DnaJ	DnaJ domain	cytoplasmic	3	27	22.1	High
K7ELG9	Protein LSM12 homolog OS=Homo sapiens OX=9606 GN=LSM12 PE=1 SV=1	0.797352	-0.326711	0.01686	down	yes	0.783	0.982	------	------	------	------	------	------	------	------	PF09793.6	AD	Anticodon-binding domain	cytoplasmic	4	29	24.9	High
A6NDU8	UPF0600 protein C5orf51 OS=Homo sapiens OX=9606 GN=C5orf51 PE=1 SV=1	0.738916	-0.436517	0.0191	down	yes	0.75	1.015	BP:protein localization;BP:regulation of organelle organization;BP:regulation of transport;BP:regulation of cellular component organization;BP:regulation of GTPase activity;BP:regulation of biological process;BP:positive regulation of catalytic activity;BP:establishment of localization;BP:positive regulation of GTPase activity;BP:positive regulation of hydrolase activity;BP:intracellular protein …	GO:0008104;GO:0033043;GO:0051049;GO:0051128;GO:0043087;GO:0050789;GO:0043085;GO:0051234;GO:0043547;GO:0051345;GO:0006886;GO:0065007;GO:0044093;GO:0071702;GO:0065009;GO:0033036;GO:0031338;GO:0050790;GO:0006810;GO:0060627;GO:0045184;GO:0008150;GO:0051649;GO:0032879;GO:0051179;GO:0050794;GO:0051336;GO:0046907;GO:0090630;GO:0015031;GO:0005886;GO:0044424;GO:0044446;GO:0016020;GO:0005654;GO:0012505;GO:…	------	------	------	------	------	------	------	------	------	cytoplasmic	4	23	33.6	High
Q15018	BRISC complex subunit Abraxas 2 OS=Homo sapiens OX=9606 GN=ABRAXAS2 PE=1 SV=2	0.689655	-0.536053	0.0365	down	yes	0.72	1.044	BP:regulation of microtubule polymerization or depolymerization;BP:negative regulation of microtubule polymerization or depolymerization;BP:regulation of microtubule depolymerization;BP:regulation of metabolic process;BP:protein acetylation;BP:internal protein amino acid acetylation;BP:organic cyclic compound biosynthetic process;BP:cellular component organization or biogenesis;BP:regulation of p…	GO:0031110;GO:0031111;GO:0031114;GO:0019222;GO:0006473;GO:0006475;GO:1901362;GO:0071840;GO:0080090;GO:0044710;GO:0010605;GO:0010604;GO:0051494;GO:0051493;GO:0040029;GO:0018193;GO:0016458;GO:0048518;GO:0048519;GO:0070536;GO:1902680;GO:0043967;GO:0060255;GO:1901880;GO:2001141;GO:0006476;GO:0002931;GO:0046483;GO:0019538;GO:0010639;GO:0018205;GO:0033554;GO:0019438;GO:0070507;GO:0070646;GO:0016569;GO:…	K20799	FAM175B, ABRO1	------	------	------	------	------	------	------	cytoplasmic	1	3	46.9	Medium
A0A0A0MQR2	Replication termination factor 2 OS=Homo sapiens OX=9606 GN=RTF2 PE=1 SV=1	0.79674	-0.32782	0.00849	down	yes	0.782	0.9815	BP:nuclear DNA replication termination;BP:DNA replication termination;BP:mitotic cell cycle process;BP:nucleic acid metabolic process;BP:nitrogen compound metabolic process;BP:cell cycle process;BP:cell cycle DNA replication termination;BP:organic cyclic compound metabolic process;BP:nucleobase-containing compound metabolic process;BP:single-organism metabolic process;BP:cellular macromolecule me…	GO:1902317;GO:0006274;GO:1903047;GO:0090304;GO:0006807;GO:0022402;GO:1902294;GO:1901360;GO:0006139;GO:0044710;GO:0044260;GO:0071704;GO:1902979;GO:0044699;GO:0009987;GO:0006725;GO:0008150;GO:0008152;GO:0046483;GO:0044238;GO:0034641;GO:0044237;GO:0043170;GO:0006259;GO:0044763;GO:0043229;GO:0043227;GO:0043226;GO:0005634;GO:0044424;GO:0043231;GO:0044464;GO:0005575	------	------	------	------	------	------	PF04641.9	Rtf2	Rtf2 RING-finger	nuclear	3	12	37.5	High
A0A2R8Y851	40S ribosomal protein S29 OS=Homo sapiens OX=9606 GN=RPS29 PE=1 SV=1	0.771859	-0.37359	0.000562	down	yes	0.768	0.995	BP:primary metabolic process;BP:cellular biosynthetic process;BP:cellular nitrogen compound metabolic process;BP:nitrogen compound metabolic process;BP:cellular macromolecule biosynthetic process;BP:cellular protein metabolic process;BP:cellular macromolecule metabolic process;BP:peptide biosynthetic process;BP:organic substance metabolic process;BP:organic substance biosynthetic process;BP:cellu…	GO:0044238;GO:0044249;GO:0034641;GO:0006807;GO:0034645;GO:0044267;GO:0044260;GO:0043043;GO:0071704;GO:1901576;GO:0009987;GO:0009058;GO:0009059;GO:0008150;GO:0008152;GO:0044271;GO:0043604;GO:1901564;GO:0043603;GO:1901566;GO:0019538;GO:0044237;GO:0043170;GO:0006518;GO:0006412;GO:0044464;GO:0030529;GO:0015935;GO:0005575;GO:0032991;GO:0044391;GO:1990904;GO:0044446;GO:0044444;GO:0044424;GO:0044422;GO:…	K02980	RP-S29e, RPS29	hsa03010	Ribosome	COG0199	J:Translation, ribosomal structure and biogenesis	PF00253.18	Ribosomal_S14	Ribosomal protein S14p/S29e	mitochondrial	1	8	10.2	High
Q96IW7	Vesicle-trafficking protein SEC22a OS=Homo sapiens OX=9606 GN=SEC22A PE=1 SV=1	0.783907	-0.351246	0.007682	down	yes	0.7745	0.988	BP:exocytosis;BP:single-organism membrane organization;BP:establishment of localization in cell;BP:vesicle fusion;BP:membrane organization;BP:protein localization;BP:cellular component organization or biogenesis;BP:ER to Golgi vesicle-mediated transport;BP:single-organism organelle organization;BP:cellular component organization;BP:regulation of biological process;BP:biological regulation;BP:sing…	GO:0006887;GO:0044802;GO:0051649;GO:0006906;GO:0061024;GO:0008104;GO:0071840;GO:0006888;GO:1902589;GO:0016043;GO:0050789;GO:0065007;GO:0044699;GO:0071702;GO:0048280;GO:0044763;GO:0009987;GO:0048193;GO:0006810;GO:0046903;GO:0044801;GO:0050794;GO:0045184;GO:0015031;GO:0044765;GO:0008150;GO:0051234;GO:0051179;GO:1902578;GO:0006996;GO:0061025;GO:0033036;GO:0016192;GO:0046907;GO:0090174;GO:0032940;GO:…	K08520	SEC22A_C	------	------	COG5143	U:Intracellular trafficking, secretion, and vesicular transport	PF13774.3	Longin	Regulated-SNARE-like domain	cytoplasmic	2	10	34.9	High
Q9NZM5	Ribosome biogenesis protein NOP53 OS=Homo sapiens OX=9606 GN=NOP53 PE=1 SV=2	0.786113	-0.347192	0.01713	down	yes	0.7755	0.9865	BP:regulation of protein deubiquitination;BP:protein localization;BP:positive regulation of proteasomal ubiquitin-dependent protein catabolic process;BP:regulation of primary metabolic process;BP:regulation of metabolic process;BP:negative regulation of proteasomal ubiquitin-dependent protein catabolic process;BP:negative regulation of response to stimulus;BP:regulation of response to stimulus;BP…	GO:0090085;GO:0008104;GO:0032436;GO:0080090;GO:0019222;GO:0032435;GO:0048585;GO:0048583;GO:0051169;GO:0051898;GO:0019220;GO:0051656;GO:0051896;GO:0071840;GO:0050688;GO:0051716;GO:0010605;GO:0032434;GO:0009968;GO:0071704;GO:0009966;GO:0070727;GO:1901799;GO:0048518;GO:0048519;GO:0033036;GO:0016479;GO:0022607;GO:0006281;GO:0060255;GO:0071456;GO:0010972;GO:0050776;GO:0030162;GO:2001141;GO:0033753;GO:…	K14840	NOP53, GLTSCR2	hsa05168	Herpes simplex infection	------	------	PF07767.8	Nop53	Nop53	nuclear	4	13	54.4	High
E7EWW0	VPS35 endosomal protein sorting factor-like OS=Homo sapiens OX=9606 GN=VPS35L PE=1 SV=2	0.793683	-0.333365	0.01586	down	yes	0.779	0.9815	BP:protein localization;BP:single-organism process;BP:organic substance transport;BP:macromolecule localization;BP:Golgi vesicle transport;BP:transport;BP:establishment of protein localization;BP:single-organism transport;BP:biological_process;BP:establishment of localization in cell;BP:establishment of localization;BP:localization;BP:single-organism localization;BP:Golgi to plasma membrane trans…	GO:0008104;GO:0044699;GO:0071702;GO:0033036;GO:0048193;GO:0006810;GO:0045184;GO:0044765;GO:0008150;GO:0051649;GO:0051234;GO:0051179;GO:1902578;GO:0006893;GO:0006892;GO:1902582;GO:0016192;GO:0046907;GO:0015031;GO:0043229;GO:0043227;GO:0043226;GO:0031224;GO:0005773;GO:0016021;GO:0044424;GO:0043231;GO:0044464;GO:0005575;GO:0044444;GO:0044425;GO:0005768;GO:0005769;GO:0003674;GO:0005488;GO:0005515	------	------	------	------	------	------	------	------	------	cytoplasmic	4	5	118.5	High
P78382	CMP-sialic acid transporter OS=Homo sapiens OX=9606 GN=SLC35A1 PE=1 SV=1	0.777385	-0.363299	0.01343	down	yes	0.77	0.9905	BP:anion transport;BP:small molecule metabolic process;BP:single-organism metabolic process;BP:galactose metabolic process;BP:organic anion transport;BP:nucleotide transmembrane transport;BP:protein metabolic process;BP:transport;BP:carbohydrate derivative transport;BP:cellular protein metabolic process;BP:proton transport;BP:cellular macromolecule metabolic process;BP:carbohydrate transport;BP:h…	GO:0006820;GO:0044281;GO:0044710;GO:0006012;GO:0015711;GO:1901679;GO:0019538;GO:0006810;GO:1901264;GO:0044267;GO:0015992;GO:0044260;GO:0008643;GO:0006818;GO:0006812;GO:0006811;GO:0019318;GO:0043412;GO:0036211;GO:0008150;GO:0008152;GO:0044723;GO:0051234;GO:0015782;GO:0015781;GO:0015780;GO:0015785;GO:0090481;GO:0015931;GO:0006862;GO:0044699;GO:0072531;GO:0015672;GO:0055085;GO:0005996;GO:0043170;GO:…	K15272	SLC35A1_2_3	------	------	COG0697;COG0697	G:Carbohydrate transport and metabolism;E:Amino acid transport and metabolism	PF04142.12;PF08449.8	Nuc_sug_transp;UAA	Nucleotide-sugar transporter;UAA transporter family	ER	2	7	36.8	High
H3BQM0	Terminal nucleotidyltransferase 4B OS=Homo sapiens OX=9606 GN=TENT4B PE=1 SV=1	0.72043	-0.47307	0.03963	down	yes	0.737	1.023	CC:intracellular organelle part;CC:cellular_component;CC:cell part;CC:nucleoplasm;CC:nuclear part;CC:intracellular part;CC:organelle part;MF:nucleotidyltransferase activity;MF:transferase activity, transferring phosphorus-containing groups;MF:catalytic activity;MF:transferase activity;MF:molecular_function;	GO:0044446;GO:0005575;GO:0044464;GO:0005654;GO:0044428;GO:0044424;GO:0044422;GO:0016779;GO:0016772;GO:0003824;GO:0016740;GO:0003674	------	------	------	------	COG5260	L:Replication, recombination and repair	PF01909.20;PF03828.16	NTP_transf_2;PAP_assoc	Nucleotidyltransferase domain;Cid1 family poly A polymerase	nuclear	1	3	64.7	High
P37840	Alpha-synuclein OS=Homo sapiens OX=9606 GN=SNCA PE=1 SV=1	0.76568	-0.385187	0.000884	down	yes	0.763	0.9965	BP:regulation of presynapse assembly;BP:regulation of secretion;BP:positive regulation of secretion;BP:negative regulation of secretion;BP:regulation of transport;BP:neurotransmitter uptake;BP:regulation of neurotransmitter levels;BP:inorganic ion homeostasis;BP:regulation of phosphate metabolic process;BP:response to iro;BP:establishment of vesicle localization;BP:cellular response to stimulus;B…	GO:1905606;GO:0051046;GO:0051047;GO:0051048;GO:0051049;GO:0001504;GO:0001505;GO:0098771;GO:0019220;GO:0010040;GO:0051650;GO:0051716;GO:0043207;GO:0043206;GO:0051494;GO:0051493;GO:0033239;GO:0033238;GO:1902932;GO:0048585;GO:0015844;GO:0032101;GO:0060548;GO:0045859;GO:0006836;GO:0097480;GO:0046483;GO:0042325;GO:0042327;GO:0042326;GO:0009607;GO:0051193;GO:0009605;GO:0019538;GO:0010639;GO:0001956;GO:…	K04528	SNCA	hsa05010;hsa05012	Alzheimer's disease;Parkinson's disease	------	------	PF01387.14	Synuclein	Synuclein	cytoplasmic	3	22	14.5	High
Q16643	Drebrin OS=Homo sapiens OX=9606 GN=DBN1 PE=1 SV=4	0.734714	-0.444745	0.003005	down	yes	0.745	1.014	BP:nuclear transport;BP:primary metabolic process;BP:spliceosomal complex assembly;BP:maintenance of location in cell;BP:regulation of cell projection organization;BP:cellular component organization or biogenesis;BP:organic substance metabolic process;BP:cellular developmental process;BP:regulation of neuron differentiation;BP:maintenance of protein location;BP:regulation of neuron projection dev…	GO:0051169;GO:0044238;GO:0000245;GO:0051651;GO:0031344;GO:0071840;GO:0071704;GO:0048869;GO:0045664;GO:0045185;GO:0010975;GO:0046483;GO:0044707;GO:0019438;GO:0022607;GO:0008152;GO:0043170;GO:0050789;GO:1901576;GO:0000387;GO:0044260;GO:1901362;GO:0016043;GO:0065007;GO:0044699;GO:0065008;GO:0018130;GO:0006139;GO:0050793;GO:0006810;GO:0050794;GO:0051128;GO:0008150;GO:0051239;GO:0034654;GO:0051235;GO:…	------	------	------	------	------	------	PF00241.17	Cofilin_ADF	Cofilin/tropomyosin-type actin-binding protein	cytoplasmic	15	42	71.4	High
Q9H6X2	Anthrax toxin receptor 1 OS=Homo sapiens OX=9606 GN=ANTXR1 PE=1 SV=2	0.77716	-0.363716	0.01289	down	yes	0.769	0.9895	BP:regulation of primary metabolic process;BP:regulation of metabolic process;BP:substrate adhesion-dependent cell spreading;BP:positive regulation of metallopeptidase activity;BP:signal transduction;BP:cellular component morphogenesis;BP:cellular component organization or biogenesis;BP:cellular developmental process;BP:positive regulation of molecular function;BP:positive regulation of biologica…	GO:0080090;GO:0019222;GO:0034446;GO:1905050;GO:0007165;GO:0032989;GO:0071840;GO:0048869;GO:0044093;GO:0048518;GO:0065007;GO:0031589;GO:1905048;GO:0060255;GO:0030162;GO:0009893;GO:0000904;GO:0000902;GO:0051345;GO:0001568;GO:0016043;GO:0043085;GO:0065009;GO:0098602;GO:0050790;GO:0050794;GO:0008150;GO:0010604;GO:0051336;GO:0051129;GO:0051128;GO:0009653;GO:1901201;GO:0044699;GO:1901202;GO:0051246;GO:…	K20909	ANTXR	hsa04621	NOD-like receptor signaling pathway	------	------	PF05586.8;PF05587.10;PF00092.25;PF13519.3	Ant_C;Anth_Ig;VWA;VWA_2	Anthrax receptor C-terminus region;Anthrax receptor extracellular domain;von Willebrand factor type A domain;von Willebrand factor type A domain	plasma membrane	3	6	62.7	High
F5H0R1	Speckle targeted PIP5K1A-regulated poly(A) polymerase OS=Homo sapiens OX=9606 GN=TUT1 PE=1 SV=1	0.792049	-0.336339	0.01045	down	yes	0.777	0.981	BP:histone mRNA catabolic process;BP:organic cyclic compound metabolic process;BP:organic cyclic compound catabolic process;BP:snRNA processing;BP:ncRNA processing;BP:pre-mRNA cleavage required for polyadenylation;BP:heterocycle metabolic process;BP:aromatic compound catabolic process;BP:mRNA polyadenylation;BP:mRNA cleavage;BP:nitrogen compound metabolic process;BP:ncRNA metabolic process;BP:org…	GO:0071044;GO:1901360;GO:1901361;GO:0016180;GO:0034470;GO:0098789;GO:0046483;GO:0019439;GO:0006378;GO:0006379;GO:0006807;GO:0034660;GO:1901575;GO:0044260;GO:0046700;GO:0008150;GO:0008152;GO:0034655;GO:0016070;GO:0016071;GO:0016073;GO:0044270;GO:0008334;GO:0044248;GO:0034641;GO:0006139;GO:0009987;GO:0006725;GO:0090501;GO:0043170;GO:0000956;GO:0090304;GO:0090305;GO:0043631;GO:0071704;GO:0098787;GO:…	K18709	TUT1	------	------	COG5260	L:Replication, recombination and repair	PF03828.16	PAP_assoc	Cid1 family poly A polymerase	cytoplasmic	1	2	98.4	Medium
Q8NI22	Multiple coagulation factor deficiency protein 2 OS=Homo sapiens OX=9606 GN=MCFD2 PE=1 SV=1	0.759259	-0.397335	0.02348	down	yes	0.7585	0.999	BP:protein localization;BP:regulation of phosphate metabolic process;BP:cytokine-mediated signaling pathway;BP:regulation of metabolic process;BP:macrophage differentiation;BP:monocyte differentiation;BP:positive regulation of response to stimulus;BP:vesicle coating;BP:signal transduction;BP:cell surface receptor signaling pathway;BP:enzyme linked receptor protein signaling pathway;BP:transmembra…	GO:0008104;GO:0019220;GO:0019221;GO:0019222;GO:0030225;GO:0030224;GO:0048584;GO:0006901;GO:0007165;GO:0007166;GO:0007167;GO:0007169;GO:0071840;GO:0044710;GO:0010604;GO:0043207;GO:0071704;GO:0009966;GO:0048869;GO:0018193;GO:0002252;GO:0016310;GO:0048518;GO:0048519;GO:0002067;GO:0002065;GO:0042127;GO:0060255;GO:0048583;GO:2001141;GO:0051707;GO:0042325;GO:0023056;GO:0042327;GO:0009607;GO:0016192;GO:…	K20364	MCFD2	------	------	------	------	PF13405.3;PF13499.3;PF00036.29	EF-hand_6;EF-hand_7;EF-hand_1	EF-hand domain;EF-hand domain pair;EF hand	ER	2	28	16.4	High
Q9UBU8	Mortality factor 4-like protein 1 OS=Homo sapiens OX=9606 GN=MORF4L1 PE=1 SV=2	0.766332	-0.383959	0.04948	down	yes	0.7625	0.995	BP:regulation of primary metabolic process;BP:regulation of metabolic process;BP:protein acylation;BP:protein acetylation;BP:G1/S transition of mitotic cell cycle;BP:protein deacetylation;BP:organic cyclic compound biosynthetic process;BP:organic cyclic compound metabolic process;BP:single-organism metabolic process;BP:negative regulation of macromolecule metabolic process;BP:double-strand break …	GO:0080090;GO:0019222;GO:0043543;GO:0006473;GO:0000082;GO:0006476;GO:1901362;GO:1901360;GO:0044710;GO:0010605;GO:0006302;GO:0040029;GO:0018193;GO:0016458;GO:0006260;GO:0048519;GO:0016570;GO:0006281;GO:0060255;GO:0006475;GO:2001141;GO:0046483;GO:0019538;GO:0018205;GO:0033554;GO:0019438;GO:0016569;GO:0009892;GO:0009890;GO:0010629;GO:0006807;GO:0050789;GO:0097659;GO:0044267;GO:0044260;GO:0018394;GO:…	K11339	MORF4L1, MRG15, EAF3	------	------	------	------	PF05712.10;PF11717.5	MRG;Tudor-knot	MRG;RNA binding activity-knot of a chromodomain	cytoplasmic	2	8	41.4	High
Q99571	P2X purinoceptor 4 OS=Homo sapiens OX=9606 GN=P2RX4 PE=1 SV=2	0.753493	-0.408334	0.007908	down	yes	0.755	1.002	BP:hemostasis;BP:regulation of secretion;BP:positive regulation of secretion;BP:regulation of transport;BP:blood coagulation;BP:regulation of calcium-mediated signaling;BP:action potential;BP:regulation of phosphate metabolic process;BP:cellular response to stimulus;BP:regulation of response to stimulus;BP:inorganic ion transmembrane transport;BP:phosphatidylinositol metabolic process;BP:glycerol…	GO:0007599;GO:0051046;GO:0051047;GO:0051049;GO:0007596;GO:0050848;GO:0001508;GO:0019220;GO:0051716;GO:0048583;GO:0098660;GO:0046488;GO:0046486;GO:0065009;GO:0042327;GO:0010632;GO:0019538;GO:0009893;GO:0009891;GO:0035556;GO:0050789;GO:0051347;GO:0006886;GO:0002684;GO:0002682;GO:0071840;GO:0006629;GO:1903649;GO:0042325;GO:2000377;GO:0006623;GO:0043412;GO:1903522;GO:0009267;GO:0032890;GO:0032892;GO:…	K05218	P2RX4	hsa04020;hsa04080	Calcium signaling pathway;Neuroactive ligand-receptor interaction	------	------	PF00864.16	P2X_receptor	ATP P2X receptor	ER	2	7	43.3	High
Q9NX46	ADP-ribose glycohydrolase ARH3 OS=Homo sapiens OX=9606 GN=ADPRHL2 PE=1 SV=1	0.776036	-0.365804	0.01741	down	yes	0.7675	0.989	BP:cell development;BP:female gamete generation;BP:organic cyclic compound biosynthetic process;BP:organic cyclic compound metabolic process;BP:cellular response to superoxide;BP:cellular response to stimulus;BP:cellular developmental process;BP:germ cell development;BP:developmental process involved in reproduction;BP:spermatogenesis;BP:cellular process involved in reproduction in multicellular …	GO:0048468;GO:0007292;GO:1901362;GO:1901360;GO:0071451;GO:0051716;GO:0048869;GO:0007281;GO:0003006;GO:0007283;GO:0022412;GO:0010035;GO:0046483;GO:0044702;GO:0044707;GO:0033554;GO:0019438;GO:0070887;GO:0000305;GO:0000303;GO:0000302;GO:0006807;GO:0097659;GO:1901576;GO:0044260;GO:0071450;GO:0006366;GO:0048477;GO:0018130;GO:0006950;GO:0008150;GO:0008152;GO:0034654;GO:0016070;GO:0044271;GO:0050896;GO:…	K11687	ADPRHL2	------	------	COG1397	O:Posttranslational modification, protein turnover, chaperones	PF03747.11	ADP_ribosyl_GH	ADP-ribosylglycohydrolase	mitochondrial	6	27	38.9	High
Q8N584	Tetratricopeptide repeat protein 39C OS=Homo sapiens OX=9606 GN=TTC39C PE=2 SV=2	0.74256	-0.429421	0.001574	down	yes	0.7485	1.008	------	------	------	------	------	------	------	------	PF10300.6;PF07719.14;PF10345.6	DUF3808;TPR_2;Cohesin_load	Protein of unknown function;Tetratricopeptide repeat;Cohesin loading factor	cytoplasmic	1	2	65.8	High
Q9UFC0	Leucine-rich repeat and WD repeat-containing protein 1 OS=Homo sapiens OX=9606 GN=LRWD1 PE=1 SV=2	0.771328	-0.374584	0.007311	down	yes	0.764	0.9905	BP:regulation of primary metabolic process;BP:regulation of metabolic process;BP:nucleobase-containing compound metabolic process;BP:organic cyclic compound biosynthetic process;BP:cellular component organization or biogenesis;BP:RNA biosynthetic process;BP:DNA replication;BP:regulation of macromolecule metabolic process;BP:establishment of protein localization;BP:regulation of RNA biosynthetic p…	GO:0080090;GO:0019222;GO:0006139;GO:1901362;GO:0071840;GO:0032774;GO:0006260;GO:0060255;GO:0045184;GO:2001141;GO:0046483;GO:0006270;GO:0050789;GO:0019438;GO:1901576;GO:0044260;GO:0016043;GO:0065007;GO:1901360;GO:0018130;GO:0009889;GO:0050794;GO:0008150;GO:0008152;GO:0034654;GO:0051234;GO:0016070;GO:0044271;GO:0070199;GO:0006355;GO:0010556;GO:0006351;GO:0071169;GO:0044249;GO:0034641;GO:0034645;GO:…	------	------	------	------	COG4886	S:Function unknown	PF12799.4;PF13855.3	LRR_4;LRR_8	Leucine Rich repeats;Leucine rich repeat	peroxisomal	4	11	70.8	High
Q9BSE5	Agmatinase, mitochondrial OS=Homo sapiens OX=9606 GN=AGMAT PE=1 SV=2	0.689306	-0.536783	0.01554	down	yes	0.7155	1.038	BP:single-organism metabolic process;BP:primary metabolic process;BP:spermidine metabolic process;BP:polyamine biosynthetic process;BP:alpha-amino acid metabolic process;BP:carboxylic acid metabolic process;BP:polyamine metabolic process;BP:cellular biogenic amine biosynthetic process;BP:cellular nitrogen compound metabolic process;BP:nitrogen compound metabolic process;BP:arginine metabolic proc…	GO:0044710;GO:0044238;GO:0008216;GO:0006596;GO:1901605;GO:0019752;GO:0006595;GO:0042401;GO:0034641;GO:0006807;GO:0006525;GO:0007276;GO:0009064;GO:0007283;GO:1901576;GO:0022414;GO:0006986;GO:0033388;GO:0097164;GO:0006520;GO:0071704;GO:1901160;GO:1901162;GO:0009987;GO:0048609;GO:0009308;GO:0009309;GO:0009445;GO:0044271;GO:0009446;GO:0006082;GO:0006950;GO:0044711;GO:0008150;GO:0008152;GO:0048232;GO:…	K01480	speB	hsa00330	Arginine and proline metabolism	COG0010	E:Amino acid transport and metabolism	PF00491.18	Arginase	Arginase family	mitochondrial	2	11	37.6	High
Q05209	Tyrosine-protein phosphatase non-receptor type 12 OS=Homo sapiens OX=9606 GN=PTPN12 PE=1 SV=3	0.786952	-0.345652	0.01039	down	yes	0.772	0.981	BP:protein localization;BP:developmental growth;BP:protein dephosphorylation;BP:negative regulation of response to stimulus;BP:regulation of response to stimulus;BP:signal transduction;BP:cell surface receptor signaling pathway;BP:enzyme linked receptor protein signaling pathway;BP:transmembrane receptor protein tyrosine kinase signaling pathway;BP:cellular response to stimulus;BP:negative regula…	GO:0008104;GO:0048589;GO:0006470;GO:0048585;GO:0048583;GO:0007165;GO:0007166;GO:0007167;GO:0007169;GO:0051716;GO:0009968;GO:0009966;GO:0070849;GO:0070848;GO:0048519;GO:0033036;GO:0045184;GO:0010033;GO:0019538;GO:0042246;GO:0010648;GO:0050789;GO:0044267;GO:0044260;GO:0065007;GO:0044699;GO:0006810;GO:0034097;GO:0009888;GO:0050794;GO:0043412;GO:0036211;GO:0008150;GO:0008152;GO:0051234;GO:0071345;GO:…	K18024	PTPN12_18_22	------	------	COG5599	T:Signal transduction mechanisms	PF00102.24	Y_phosphatase	Protein-tyrosine phosphatase	cytoplasmic	4	7	88.1	High
P05452	Tetranectin OS=Homo sapiens OX=9606 GN=CLEC3B PE=1 SV=3	0.77789	-0.362361	0.02973	down	yes	0.767	0.986	BP:regulation of primary metabolic process;BP:regulation of metabolic process;BP:ossification;BP:cellular response to stimulus;BP:response to growth factor;BP:positive regulation of biological process;BP:regulation of cell proliferation;BP:regulation of macromolecule metabolic process;BP:regulation of proteolysis;BP:response to organic substance;BP:vesicle-mediated transport;BP:single-multicellul…	GO:0080090;GO:0019222;GO:0001503;GO:0051716;GO:0070848;GO:0048518;GO:0042127;GO:0060255;GO:0030162;GO:0010033;GO:0016192;GO:0044707;GO:0010468;GO:0009893;GO:0032940;GO:0010628;GO:0006887;GO:0045055;GO:0065007;GO:0006810;GO:0009888;GO:0050794;GO:0008150;GO:0051234;GO:0010604;GO:0046903;GO:0070613;GO:0050896;GO:1903319;GO:1903317;GO:0070887;GO:0044699;GO:0009719;GO:0051246;GO:0051247;GO:0032270;GO:…	K17520	CLEC3B	------	------	------	------	PF00059.18	Lectin_C	Lectin C-type domain	ER	2	16	22.5	High
Q8WXH0	Nesprin-2 OS=Homo sapiens OX=9606 GN=SYNE2 PE=1 SV=3	0.749501	-0.415998	0.003182	down	yes	0.751	1.002	BP:protein localization;BP:membrane organization;BP:establishment or maintenance of cell polarity;BP:signal transduction;BP:cell surface receptor signaling pathway;BP:establishment of organelle localization;BP:maintenance of location in cell;BP:regulation of cell projection organization;BP:cellular component organization or biogenesis;BP:cellular macromolecule localization;BP:positive regulation …	GO:0008104;GO:0061024;GO:0007163;GO:0007165;GO:0007166;GO:0051656;GO:0051651;GO:0031344;GO:0071840;GO:0070727;GO:0048518;GO:0048519;GO:0033036;GO:0007605;GO:0007600;GO:0045185;GO:0010970;GO:0003008;GO:0016477;GO:0060491;GO:0022604;GO:0044707;GO:0022603;GO:0006928;GO:0051640;GO:0050789;GO:0016043;GO:0050793;GO:0065007;GO:1902017;GO:0065008;GO:0007186;GO:0098602;GO:0098609;GO:0010761;GO:0050953;GO:…	K19346	SYNE2	------	------	COG5069	Z:Cytoskeleton	PF00307.28;PF10541.6;PF00435.18;PF11971.5	CH;KASH;Spectrin;CAMSAP_CH	Calponin homology;Nuclear envelope localisation domain;Spectrin repeat;CAMSAP CH domain	cytoplasmic	3	0	795.9	High
A0A087WZE9	High mobility group nucleosome-binding domain-containing protein 3 OS=Homo sapiens OX=9606 GN=HMGN3 PE=1 SV=1	0.747258	-0.420321	0.003891	down	yes	0.7495	1.003	BP:regulation of peptide transport;BP:regulation of primary metabolic process;BP:regulation of metabolic process;BP:regulation of transport;BP:regulation of response to stimulus;BP:regulation of homeostatic process;BP:positive regulation of macromolecule metabolic process;BP:positive regulation of molecular function;BP:positive regulation of biological process;BP:regulation of macromolecule metab…	GO:0090087;GO:0080090;GO:0019222;GO:0051049;GO:0048583;GO:0032844;GO:0010604;GO:0044093;GO:0048518;GO:0060255;GO:0090276;GO:2001141;GO:0009893;GO:0009891;GO:0010628;GO:0051223;GO:0050789;GO:0050708;GO:0065007;GO:0065009;GO:0065008;GO:0070201;GO:0009889;GO:0050796;GO:0050794;GO:0008150;GO:0061178;GO:0006355;GO:0010557;GO:0006357;GO:0051046;GO:1903530;GO:0023051;GO:0010646;GO:0032880;GO:1903508;GO:…	------	------	------	------	------	------	PF01101.15	HMG14_17	HMG14 and HMG17	cytoplasmic	1	7	13.9	High
P0CG13	Chromosome transmission fidelity protein 8 homolog OS=Homo sapiens OX=9606 GN=CHTF8 PE=1 SV=1	0.741551	-0.431383	0.01188	down	yes	0.746	1.006	BP:regulation of primary metabolic process;BP:regulation of metabolic process;BP:cellular component organization or biogenesis;BP:regulation of DNA-directed DNA polymerase activity;BP:positive regulation of DNA-directed DNA polymerase activity;BP:positive regulation of macromolecule metabolic process;BP:DNA replication;BP:positive regulation of molecular function;BP:positive regulation of biologi…	GO:0080090;GO:0019222;GO:0071840;GO:1900262;GO:1900264;GO:0010604;GO:0006260;GO:0044093;GO:0048518;GO:0051054;GO:0051052;GO:0060255;GO:0046483;GO:0006275;GO:0009893;GO:0009891;GO:0006807;GO:0007064;GO:0050789;GO:0007062;GO:1901576;GO:0051347;GO:0044260;GO:0016043;GO:0065007;GO:0044699;GO:0065009;GO:2000278;GO:0050790;GO:0009889;GO:0050794;GO:0008150;GO:0008152;GO:0051338;GO:0010557;GO:0010556;GO:…	K11270	CTF8	------	------	------	------	PF09696.7	Ctf8	Ctf8	cytoplasmic	1	11	13.3	High
Q5JPE7	Nodal modulator 2 OS=Homo sapiens OX=9606 GN=NOMO2 PE=1 SV=1	0.792733	-0.335093	0.01266	down	yes	0.7745	0.977	BP:protein localization;BP:establishment of localization in cell;BP:single-organism process;BP:biological regulation;BP:organic substance transport;BP:macromolecule localization;BP:endosomal transport;BP:transport;BP:establishment of protein localization;BP:protein transport;BP:single-organism transport;BP:biological_process;BP:retrograde transport, endosome to Golgi;BP:single-organism intracellu…	GO:0008104;GO:0051649;GO:0044699;GO:0065007;GO:0071702;GO:0033036;GO:0016197;GO:0006810;GO:0045184;GO:0015031;GO:0044765;GO:0008150;GO:0042147;GO:1902582;GO:0031648;GO:0051234;GO:0051179;GO:1902578;GO:0016482;GO:0046907;GO:0065008;GO:0016192;GO:0007034;GO:0031647;GO:0005783;GO:0005789;GO:0031224;GO:0043227;GO:0043226;GO:0005575;GO:0031090;GO:0016021;GO:0016020;GO:0044432;GO:0030904;GO:0098588;GO:…	------	------	------	------	------	------	PF13620.3;PF05738.10;PF09430.7;PF13715.3	CarboxypepD_reg;Cna_B;DUF2012;CarbopepD_reg_2	Carboxypeptidase regulatory-like domain;Cna protein B-type domain;Protein of unknown function;CarboxypepD_reg-like domain	ER	2	37	139.4	High
Q9BUN8	Derlin-1 OS=Homo sapiens OX=9606 GN=DERL1 PE=1 SV=1	0.793545	-0.333616	0.01756	down	yes	0.7745	0.976	BP:symbiont intracellular protein transport in host;BP:protein localization;BP:regulation of metabolic process;BP:organonitrogen compound biosynthetic process;BP:signal transduction;BP:cellular component organization or biogenesis;BP:regulation of primary metabolic process;BP:single-organism catabolic process;BP:single-organism metabolic process;BP:response to unfolded protein;BP:positive regulat…	GO:0030581;GO:0008104;GO:0019222;GO:1901566;GO:0007165;GO:0071840;GO:0080090;GO:0044712;GO:0044710;GO:0006986;GO:0010604;GO:0070647;GO:0075733;GO:0044419;GO:0032446;GO:0044093;GO:0048518;GO:0033036;GO:0060255;GO:0045184;GO:0051708;GO:0030163;GO:1901564;GO:0051701;GO:0010033;GO:0051704;GO:0065008;GO:0019538;GO:0050789;GO:0016567;GO:0033554;GO:0022607;GO:0006457;GO:0009893;GO:0036503;GO:0044267;GO:…	K11519	DERL1	hsa04141;hsa05014	Protein processing in endoplasmic reticulum;Amyotrophic lateral sclerosi	COG5291	S:Function unknown	PF04511.12	DER1	Der1-like family	ER	3	12	28.8	High
E5RK69	Annexin OS=Homo sapiens OX=9606 GN=ANXA6 PE=1 SV=1	0.76272	-0.390774	0.004518	down	yes	0.757	0.9925	CC:intrinsic component of membrane;CC:cellular_component;CC:integral component of membrane;CC:membrane part;MF:molecular transducer activity;MF:molecular_function;MF:binding;MF:anion binding;MF:phospholipid binding;MF:calcium-dependent phospholipid binding;MF:ligand-gated ion channel activity;MF:ion binding;MF:calcium ion binding;MF:passive transmembrane transporter activity;MF:metal ion binding;…	GO:0031224;GO:0005575;GO:0016021;GO:0044425;GO:0060089;GO:0003674;GO:0005488;GO:0043168;GO:0005543;GO:0005544;GO:0015276;GO:0043167;GO:0005509;GO:0022803;GO:0046872;GO:0005216;GO:0043169;GO:0005215;GO:0005230;GO:0008289;GO:0022891;GO:0022892;GO:0015075;GO:0022857;GO:0015267;GO:0022836;GO:0022834;GO:0022838;GO:0099600;GO:0004872	------	------	------	------	------	------	PF00191.17	Annexin	Annexin	cytoplasmic	1	63	51.7	High
P84095	Rho-related GTP-binding protein RhoG OS=Homo sapiens OX=9606 GN=RHOG PE=1 SV=1	0.775635	-0.366551	0.01421	down	yes	0.764	0.985	BP:regulation of primary metabolic process;BP:regulation of metabolic process;BP:regulation of response to stimulus;BP:regulation of cell projection assembly;BP:signal transduction;BP:cell chemotaxis;BP:positive regulation of establishment of protein localization to plasma membrane;BP:regulation of establishment of protein localization to plasma membrane;BP:cellular component organization or biog…	GO:0080090;GO:0019222;GO:0048583;GO:0060491;GO:0007165;GO:0060326;GO:0090004;GO:0090003;GO:0071840;GO:0042330;GO:0009966;GO:0001775;GO:0044093;GO:0048518;GO:0042127;GO:0051056;GO:0006935;GO:0060255;GO:0002275;GO:2001141;GO:0051704;GO:0016192;GO:0048870;GO:0006355;GO:0002376;GO:0002274;GO:0009893;GO:0009891;GO:0090630;GO:0006928;GO:0045321;GO:0032940;GO:0010628;GO:0045935;GO:0035556;GO:0050789;GO:…	K07863	RHOG	hsa05132;hsa05131;hsa05100	Salmonella infection;Shigellosis;Bacterial invasion of epithelial cells	COG1100	R:General function prediction only	PF00071.19;PF08477.10;PF00025.18	Ras;Roc;Arf	Ras family;Ras of Complex, Roc, domain of DAPkinase;ADP-ribosylation factor family	cytoplasmic	7	45	21.3	High
Q8WUX9	Charged multivesicular body protein 7 OS=Homo sapiens OX=9606 GN=CHMP7 PE=1 SV=1	0.79702	-0.327313	0.03864	down	yes	0.7755	0.973	BP:protein localization;BP:regulation of primary metabolic process;BP:regulation of metabolic process;BP:membrane budding;BP:membrane organization;BP:establishment of organelle localization;BP:cellular component organization or biogenesis;BP:cellular macromolecule localization;BP:cell separation after cytokinesis;BP:interspecies interaction between organisms;BP:viral life cycle;BP:biological regu…	GO:0008104;GO:0080090;GO:0019222;GO:0006900;GO:0061024;GO:0051656;GO:0071840;GO:0070727;GO:0000920;GO:0044419;GO:0019058;GO:0065007;GO:0033036;GO:0060255;GO:0031468;GO:1904903;GO:2001141;GO:0051704;GO:0016197;GO:0016050;GO:0022607;GO:0016043;GO:0006810;GO:0009889;GO:0050794;GO:0044802;GO:0044803;GO:0051234;GO:0046907;GO:0039702;GO:0006355;GO:0010556;GO:0008150;GO:0071168;GO:0043241;GO:0044699;GO:…	K15053	CHMP7	hsa04144	Endocytosis	------	------	PF03357.18	Snf7	Snf7	cytoplasmic	3	12	50.9	High
Q9UHW5	GPN-loop GTPase 3 OS=Homo sapiens OX=9606 GN=GPN3 PE=1 SV=2	0.784584	-0.35	0.03866	down	yes	0.7685	0.9795	BP:protein folding;BP:regulation of organelle organization;BP:regulation of cellular component organization;BP:regulation of biological process;BP:regulation of cytoskeleton organization;BP:biological regulation;BP:positive regulation of organelle organization;BP:positive regulation of cellular component organization;BP:cellular process;BP:regulation of cellular process;BP:biological_process;BP:p…	GO:0006457;GO:0033043;GO:0051128;GO:0050789;GO:0051493;GO:0065007;GO:0010638;GO:0051130;GO:0009987;GO:0050794;GO:0008150;GO:0051495;GO:0048518;GO:0048522;GO:0044464;GO:0043229;GO:0005739;GO:0016272;GO:0043227;GO:0043226;GO:0005737;GO:0070062;GO:0005634;GO:0032991;GO:1903561;GO:0031982;GO:0043234;GO:0043230;GO:0043231;GO:0005829;GO:0005575;GO:0044444;GO:0044424;GO:0044421;GO:0043168;GO:0035639;GO:…	K06883	K06883	------	------	------	------	PF03029.14	ATP_bind_1	Conserved hypothetical ATP binding protein	cytoplasmic	3	20	32.7	High
Q14161	ARF GTPase-activating protein GIT2 OS=Homo sapiens OX=9606 GN=GIT2 PE=1 SV=2	0.769504	-0.378	0.01642	down	yes	0.7595	0.987	BP:asymmetric protein localization;BP:protein localization;BP:regulation of metabolic process;BP:regulation of response to stimulus;BP:behavior;BP:auditory receptor cell stereocilium organization;BP:membrane organization;BP:regulation of G-protein coupled receptor protein signaling pathway;BP:establishment or maintenance of cell polarity;BP:behavioral response to pain;BP:cellular component organi…	GO:0008105;GO:0008104;GO:0019222;GO:0048583;GO:0007610;GO:0060088;GO:0061024;GO:0008277;GO:0007163;GO:0048266;GO:0071840;GO:0045786;GO:0042330;GO:0009966;GO:0048869;GO:0009611;GO:1902414;GO:0044419;GO:0044093;GO:0048518;GO:0048519;GO:0033036;GO:0006935;GO:0060255;GO:0006903;GO:0051668;GO:0065009;GO:0051704;GO:0044700;GO:0016192;GO:0048870;GO:0044708;GO:0044802;GO:0007154;GO:0098916;GO:0042060;GO:…	K12487	GIT2	hsa04144	Endocytosis	------	------	PF12205.5;PF16559.2;PF01412.15;PF08518.8;PF12796.4;PF13857.3;PF13637.3	GIT1_C;GIT_CC;ArfGap;GIT_SHD;Ank_2;Ank_5;Ank_4	G protein-coupled receptor kinase-interacting protein 1 C term;GIT coiled-coil Rho guanine nucleotide exchange factor;Putative GTPase activating protein for Arf;Spa2 homology domain;Ankyrin repeats;Ankyrin repeats;Ankyrin repeats	cytoplasmic	2	8	84.5	High
J3KN01	Afadin OS=Homo sapiens OX=9606 GN=AFDN PE=1 SV=1	0.656546	-0.607031	0.02379	down	yes	0.692	1.054	BP:adherens junction organization;BP:cell junction organization;BP:cell development;BP:regulation of biological process;BP:endothelial cell development;BP:signaling;BP:establishment of endothelial intestinal barrier;BP:regulation of GTPase activity;BP:establishment of endothelial barrier;BP:positive regulation of catalytic activity;BP:positive regulation of GTPase activity;BP:positive regulation …	GO:0034332;GO:0034330;GO:0048468;GO:0050789;GO:0001885;GO:0023052;GO:0090557;GO:0043087;GO:0061028;GO:0043085;GO:0043547;GO:0051345;GO:0048869;GO:0071840;GO:0016043;GO:0065007;GO:0044093;GO:0065009;GO:0022610;GO:0002064;GO:0032502;GO:0007267;GO:0050790;GO:0044767;GO:0008150;GO:0045216;GO:0007155;GO:0007154;GO:0050794;GO:0051336;GO:0044700;GO:0044699;GO:0048856;GO:0044763;GO:0009987;GO:0007165;GO:…	K05702	AF6, MLLT4	hsa04024;hsa04670;hsa04530;hsa04015;hsa04014;hsa04520	cAMP signaling pathway;Leukocyte transendothelial migration;Tight junction;Rap1 signaling pathway;Ras signaling pathway;Adherens junction	------	------	PF00788.20;PF01843.16;PF00595.21;PF00498.23	RA;DIL;PDZ;FHA	Ras association;DIL domain;PDZ domain;FHA domain	nuclear	2	1	207.5	High
Q12789	General transcription factor 3C polypeptide 1 OS=Homo sapiens OX=9606 GN=GTF3C1 PE=1 SV=4	0.763131	-0.389997	0.00236	down	yes	0.7555	0.99	BP:regulation of primary metabolic process;BP:regulation of metabolic process;BP:organic cyclic compound biosynthetic process;BP:organic cyclic compound metabolic process;BP:organic substance metabolic process;BP:transcription initiation from RNA polymerase III promoter;BP:transcription from RNA polymerase III promoter;BP:ncRNA processing;BP:regulation of macromolecule metabolic process;BP:matura…	GO:0080090;GO:0019222;GO:1901362;GO:1901360;GO:0071704;GO:0006384;GO:0006383;GO:0034470;GO:0060255;GO:0000462;GO:2001141;GO:0046483;GO:0044249;GO:0050789;GO:0019438;GO:0034660;GO:0097659;GO:1901576;GO:0044260;GO:0065007;GO:0006364;GO:0018130;GO:0006139;GO:0009304;GO:0009889;GO:0009303;GO:0008150;GO:0008152;GO:0034654;GO:0050794;GO:0016070;GO:0016072;GO:0044271;GO:0006355;GO:0010556;GO:0006351;GO:…	K15199	GTF3C1	------	------	------	------	PF04182.9	B-block_TFIIIC	B-block binding subunit of TFIIIC	nuclear	6	4	238.7	High
Q86YQ8	Copine-8 OS=Homo sapiens OX=9606 GN=CPNE8 PE=1 SV=2	0.761616	-0.392864	0.002237	down	yes	0.754	0.99	BP:phosphatidic acid biosynthetic process;BP:glycerophospholipid metabolic process;BP:regulation of biological process;BP:cellular biosynthetic process;BP:signal transduction;BP:intracellular signal transduction;BP:cellular lipid metabolic process;BP:single-organism process;BP:glycerolipid biosynthetic process;BP:single-organism metabolic process;BP:single-organism biosynthetic process;BP:organic…	GO:0006654;GO:0006650;GO:0050789;GO:0044249;GO:0007165;GO:0035556;GO:0044255;GO:0044699;GO:0045017;GO:0044710;GO:0044711;GO:0071704;GO:0065007;GO:0006644;GO:0006629;GO:1901576;GO:0009987;GO:0050794;GO:0009058;GO:0044763;GO:0008152;GO:0046474;GO:0046486;GO:0090407;GO:0048017;GO:0008610;GO:0044238;GO:0008654;GO:0044237;GO:0006796;GO:0006793;GO:0019637;GO:0008150;GO:0046473;GO:0043227;GO:0070062;GO:…	------	------	------	------	------	------	PF07002.13;PF00168.27;PF10138.6	Copine;C2;vWA-TerF-like	Copine;C2 domain;vWA found in TerF C terminus	cytoplasmic	5	15	63.1	High
A0A494C0K7	Mediator of RNA polymerase II transcription subunit 27 OS=Homo sapiens OX=9606 GN=MED27 PE=1 SV=1	0.694849	-0.525228	0.008778	down	yes	0.715	1.029	BP:regulation of primary metabolic process;BP:regulation of metabolic process;BP:organic cyclic compound biosynthetic process;BP:organic cyclic compound metabolic process;BP:protein modification by small protein conjugation or removal;BP:protein modification by small protein conjugation;BP:regulation of macromolecule metabolic process;BP:regulation of RNA biosynthetic process;BP:heterocycle metab…	GO:0080090;GO:0019222;GO:1901362;GO:1901360;GO:0070647;GO:0032446;GO:0060255;GO:2001141;GO:0046483;GO:0019827;GO:0044707;GO:0019538;GO:0016567;GO:0019438;GO:0006807;GO:0050789;GO:1901576;GO:0044260;GO:0065007;GO:0006367;GO:0018130;GO:0009889;GO:0050794;GO:0098727;GO:0043412;GO:0036211;GO:0008150;GO:0008152;GO:0034654;GO:0016070;GO:0044271;GO:0006355;GO:0010556;GO:0006352;GO:0032774;GO:0044249;GO:…	K15170	MED27	hsa04919	Thyroid hormone signaling pathway	------	------	------	------	------	cytoplasmic	2	9	36.4	High
Q03393	6-pyruvoyl tetrahydrobiopterin synthase OS=Homo sapiens OX=9606 GN=PTS PE=1 SV=1	0.692233	-0.53067	0.0253	down	yes	0.713	1.03	BP:regulation of primary metabolic process;BP:regulation of metabolic process;BP:DNA strand elongation involved in nuclear cell cycle DNA replication;BP:small molecule metabolic process;BP:organic cyclic compound biosynthetic process;BP:organic cyclic compound metabolic process;BP:single-organism metabolic process;BP:single-organism biosynthetic process;BP:positive regulation of DNA-directed DNA …	GO:0080090;GO:0019222;GO:1902319;GO:0044281;GO:1901362;GO:1901360;GO:0044710;GO:0044711;GO:1900264;GO:0010604;GO:0006301;GO:0044093;GO:0048518;GO:0051054;GO:0051052;GO:0006281;GO:0060255;GO:0043436;GO:0046483;GO:1901564;GO:1901566;GO:0006273;GO:0006272;GO:0006271;GO:0019985;GO:0042176;GO:0006275;GO:0070987;GO:0033554;GO:0019438;GO:0009896;GO:1903364;GO:0009894;GO:0051716;GO:0009893;GO:0009891;GO:…	K01737	queD, ptpS, PTS	hsa00790	Folate biosynthesis	COG0720	H:Coenzyme transport and metabolism	PF01242.16	PTPS	6-pyruvoyl tetrahydropterin synthase	mitochondrial	1	16	16.4	Medium
J3QR07	YTH domain-containing protein 1 OS=Homo sapiens OX=9606 GN=YTHDC1 PE=1 SV=1	0.714567	-0.484859	0.005841	down	yes	0.726	1.016	BP:cellular component assembly;BP:regulation of nucleobase-containing compound metabolic process;BP:regulation of primary metabolic process;BP:regulation of metabolic process;BP:macromolecular complex subunit organization;BP:cellular metabolic process;BP:regulation of cellular metabolic process;BP:nucleic acid metabolic process;BP:regulation of mRNA splicing, via spliceosome;BP:cellular nitrogen …	GO:0022607;GO:0019219;GO:0080090;GO:0019222;GO:0043933;GO:0044237;GO:0031323;GO:0090304;GO:0048024;GO:0034641;GO:0006807;GO:0034622;GO:0071840;GO:0043170;GO:0006396;GO:0050789;GO:0071826;GO:0044260;GO:0010608;GO:0016071;GO:0016043;GO:0071704;GO:0022618;GO:0065007;GO:1901360;GO:0050684;GO:0065003;GO:0010468;GO:0006139;GO:0060255;GO:0009987;GO:0006725;GO:0050794;GO:0000375;GO:0000377;GO:0008150;GO:…	K20100	YTHDC1	------	------	------	------	PF04146.12	YTH	YT521-B-like domain	nuclear	4	8	85.5	High
Q7Z7K0	COX assembly mitochondrial protein homolog OS=Homo sapiens OX=9606 GN=CMC1 PE=1 SV=1	0.787583	-0.344495	0.02904	down	yes	0.7675	0.9745	CC:plasma membrane region;CC:membrane;CC:intracellular organelle;CC:non-membrane-bounded organelle;CC:membrane-bounded organelle;CC:organelle;CC:cell junction;CC:synaptic membrane;CC:mitochondrion;CC:neuron part;CC:synapse part;CC:neuron projection;CC:postsynaptic density;CC:plasma membrane part;CC:membrane region;CC:cell body;CC:postsynaptic specialization;CC:cell projection;CC:dendrite;CC:intra…	GO:0098590;GO:0016020;GO:0043229;GO:0043228;GO:0043227;GO:0043226;GO:0030054;GO:0097060;GO:0005739;GO:0097458;GO:0044456;GO:0043005;GO:0014069;GO:0044459;GO:0098589;GO:0044297;GO:0099572;GO:0042995;GO:0030425;GO:0043231;GO:0043232;GO:0045211;GO:0043025;GO:0044464;GO:0005575;GO:0044444;GO:0044424;GO:0044425;GO:0019207;GO:0019899;GO:0003674;GO:0005488;GO:0004857;GO:0098772;GO:0043169;GO:0008427;GO:…	K18171	CMC1	------	------	------	------	PF08583.7	Cmc1	Cytochrome c oxidase biogenesis protein Cmc1 like	cytoplasmic	2	25	12.5	High
Q96LD4	E3 ubiquitin-protein ligase TRIM47 OS=Homo sapiens OX=9606 GN=TRIM47 PE=1 SV=2	0.73976	-0.43487	0.00615	down	yes	0.7405	1.001	BP:cellular homeostasis;BP:cardiac muscle tissue development;BP:anatomical structure homeostasis;BP:cell development;BP:muscle cell cellular homeostasis;BP:homeostatic process;BP:membrane organization;BP:heart process;BP:muscle structure development;BP:single-organism process;BP:muscle organ development;BP:cellular developmental process;BP:cellular component organization;BP:animal organ developme…	GO:0019725;GO:0048738;GO:0060249;GO:0048468;GO:0046716;GO:0042592;GO:0061024;GO:0003015;GO:0061061;GO:0044699;GO:0007517;GO:0048869;GO:0016043;GO:0048513;GO:0065007;GO:0071840;GO:0065008;GO:0032502;GO:0055001;GO:0032501;GO:0003008;GO:0009987;GO:0009888;GO:0044767;GO:0008150;GO:0048856;GO:0014706;GO:0060047;GO:0060537;GO:0044763;GO:0003013;GO:0016021;GO:0043229;GO:0043228;GO:0043227;GO:0043226;GO:…	K12023	TRIM47	------	------	------	------	PF15227.3;PF13445.3;PF00097.22;PF00643.21;PF13920.3;PF13923.3;PF13639.3;PF14634.3;PF13765.3	zf-C3HC4_4;zf-RING_UBOX;zf-C3HC4;zf-B_box;zf-C3HC4_3;zf-C3HC4_2;zf-RING_2;zf-RING_5;PRY	zinc finger of C3HC4-type, RING;RING-type zinc-finger;Zinc finger, C3HC4 type;B-box zinc finger;Zinc finger, C3HC4 type;Zinc finger, C3HC4 type;Ring finger domain;zinc-RING finger domain;SPRY-associated domain	cytoplasmic	8	21	69.5	High
P11171	Protein 4.1 OS=Homo sapiens OX=9606 GN=EPB41 PE=1 SV=4	0.799793	-0.322301	0.04249	down	yes	0.773	0.9665	BP:circulatory system process;BP:cellular component organization or biogenesis;BP:macromolecular complex assembly;BP:positive regulation of molecular function;BP:positive regulation of biological process;BP:regulation of cell shape;BP:regulation of cellular component organization;BP:regulation of cellular process;BP:system process;BP:regulation of biological process;BP:regulation of cell morphoge…	GO:0003013;GO:0071840;GO:0065003;GO:0044093;GO:0048518;GO:0008360;GO:0051128;GO:0050794;GO:0003008;GO:0050789;GO:0022604;GO:0022607;GO:0022603;GO:0032092;GO:0016043;GO:0008643;GO:0050793;GO:0065007;GO:0044699;GO:0065009;GO:0065008;GO:0008015;GO:0006812;GO:0006811;GO:0006810;GO:0006814;GO:0008150;GO:0051234;GO:0030866;GO:0030865;GO:0043393;GO:1903827;GO:0032880;GO:0015672;GO:0032501;GO:0009987;GO:…	K06107	EPB41, 4.1R	------	------	------	------	PF05902.10;PF09380.7;PF04382.10;PF08736.8;PF09379.7;PF00373.15	4_1_CTD;FERM_C;SAB;FA;FERM_N;FERM_M	4.1 protein C-terminal domain;FERM C-terminal PH-like domain;SAB domain;FERM adjacent;FERM N-terminal domain;FERM central domain	nuclear	2	4	97	High
A0A0D9SEY1	Mitogen-activated protein kinase kinase kinase kinase 4 OS=Homo sapiens OX=9606 GN=MAP4K4 PE=1 SV=1	0.76077	-0.394467	0.009949	down	yes	0.7505	0.9865	BP:regulation of nucleobase-containing compound metabolic process;BP:regulation of primary metabolic process;BP:regulation of metabolic process;BP:phosphorylation;BP:regulation of cellular metabolic process;BP:cellular protein metabolic process;BP:cellular macromolecule metabolic process;BP:regulation of cellular macromolecule biosynthetic process;BP:regulation of biological process;BP:organic su…	GO:0019219;GO:0080090;GO:0019222;GO:0016310;GO:0031323;GO:0044267;GO:0044260;GO:2000112;GO:0050789;GO:0071704;GO:0010556;GO:0065007;GO:0031326;GO:0010468;GO:0006468;GO:0060255;GO:0009987;GO:0009889;GO:0006464;GO:0050794;GO:0043412;GO:0036211;GO:0008150;GO:1903506;GO:0008152;GO:2001141;GO:0044238;GO:0019538;GO:0051252;GO:0044237;GO:0043170;GO:0006355;GO:0006796;GO:0006357;GO:0006793;GO:0051171;GO:…	------	------	------	------	------	------	PF00069.22;PF00780.19;PF07714.14	Pkinase;CNH;Pkinase_Tyr	Protein kinase domain;CNH domain;Protein tyrosine kinase	nuclear	2	2	151	High
Q9UPQ0	LIM and calponin homology domains-containing protein 1 OS=Homo sapiens OX=9606 GN=LIMCH1 PE=1 SV=4	0.792979	-0.334646	0.02401	down	yes	0.768	0.9685	BP:actomyosin structure organization;BP:regulation of small GTPase mediated signal transduction;BP:actin cytoskeleton organization;BP:regulation of signaling;BP:regulation of biological process;BP:single-organism process;BP:regulation of cell communication;BP:regulation of signal transduction;BP:cellular component organization;BP:biological regulation;BP:cellular component organization or biogene…	GO:0031032;GO:0051056;GO:0030036;GO:0023051;GO:0050789;GO:0044699;GO:0010646;GO:0009966;GO:0016043;GO:0065007;GO:0071840;GO:0032012;GO:0030029;GO:0046578;GO:0009987;GO:0048583;GO:0050794;GO:0008150;GO:1902531;GO:0006996;GO:0007010;GO:1902589;GO:0044763;GO:0098590;GO:0045202;GO:0005737;GO:0016020;GO:0044456;GO:0044459;GO:0097060;GO:0098589;GO:0045211;GO:0060077;GO:0044425;GO:0044464;GO:0005575;GO:…	------	------	------	------	------	------	PF15949.2;PF00307.28;PF00412.19	DUF4757;CH;LIM	Domain of unknown function;Calponin homology;LIM domain	cytoplasmic	9	11	121.8	High
P36894	Bone morphogenetic protein receptor type-1A OS=Homo sapiens OX=9606 GN=BMPR1A PE=1 SV=2	0.784687	-0.349812	0.03969	down	yes	0.7635	0.973	BP:regulation of intracellular protein transport;BP:regulation of transport;BP:regulation of phosphate metabolic process;BP:outflow tract morphogenesis;BP:cellular response to stimulus;BP:mesenchymal cell development;BP:regulation of metabolic process;BP:cell development;BP:regulation of epithelial cell proliferation;BP:somitogenesis;BP:fibrous ring of heart morphogenesis;BP:regulation of phospho…	GO:0033157;GO:0051049;GO:0019220;GO:0003151;GO:0051716;GO:0014031;GO:0019222;GO:0048468;GO:0050678;GO:0001756;GO:1905285;GO:0042325;GO:0042327;GO:0019538;GO:1904589;GO:0090342;GO:0009893;GO:0009891;GO:0048568;GO:0017004;GO:0030500;GO:0051222;GO:0051223;GO:0050789;GO:0003206;GO:0003203;GO:0003208;GO:0071840;GO:1901861;GO:0014032;GO:0070201;GO:0070169;GO:1903649;GO:0070167;GO:0043412;GO:0002053;GO:…	K04673	BMPR1A, ALK3, CD292	hsa04350;hsa05418;hsa04550;hsa04390;hsa04060	TGF-beta signaling pathway;Fluid shear stress and atherosclerosis;Signaling pathways regulating pluripotency of stem cells;Hippo signaling pathway;Cytokine-cytokine receptor interaction	------	------	PF07714.14;PF00069.22;PF08515.9;PF01064.20	Pkinase_Tyr;Pkinase;TGF_beta_GS;Activin_recp	Protein tyrosine kinase;Protein kinase domain;Transforming growth factor beta type I GS-motif;Activin types I and II receptor domain	ER	1	3	60.2	High
Q9NVV0	Trimeric intracellular cation channel type B OS=Homo sapiens OX=9606 GN=TMEM38B PE=1 SV=1	0.681686	-0.552821	0.01017	down	yes	0.7035	1.032	BP:nuclear export;BP:nuclear transport;BP:establishment of organelle localization;BP:cellular component organization or biogenesis;BP:cellular component organization;BP:inorganic cation transmembrane transport;BP:inorganic ion transmembrane transport;BP:potassium ion transport;BP:cation transport;BP:ion transport;BP:transport;BP:biological_process;BP:establishment of localization;BP:intracellular…	GO:0051168;GO:0051169;GO:0051656;GO:0071840;GO:0016043;GO:0098662;GO:0098660;GO:0006813;GO:0006812;GO:0006811;GO:0006810;GO:0008150;GO:0051234;GO:0046907;GO:0071805;GO:0033750;GO:0033753;GO:0042273;GO:0071804;GO:1902578;GO:0022613;GO:0015672;GO:0030001;GO:0055085;GO:0044699;GO:0000055;GO:0000054;GO:0030036;GO:0009987;GO:0030029;GO:0006913;GO:0034220;GO:0044765;GO:0044763;GO:0051649;GO:0051179;GO:…	------	------	------	------	------	------	PF05197.10	TRIC	TRIC channel	peroxisomal	1	4	32.5	Medium
P49916	DNA ligase 3 OS=Homo sapiens OX=9606 GN=LIG3 PE=1 SV=2	0.799793	-0.322302	0.03308	down	yes	0.771	0.964	BP:regulation of primary metabolic process;BP:regulation of metabolic process;BP:;BP:purine ribonucleoside monophosphate metabolic process;BP:nucleotide biosynthetic process;BP:ribonucleoside monophosphate metabolic process;BP:organic cyclic compound biosynthetic process;BP:organic cyclic compound metabolic process;BP:single-organism metabolic process;BP:single-organism biosynthetic process;BP:pi…	GO:0080090;GO:0019222;GO:0033151;GO:0009167;GO:0009165;GO:0009161;GO:1901362;GO:1901360;GO:0044710;GO:0044711;GO:0042440;GO:0006302;GO:0071840;GO:0006541;GO:0006266;GO:0009064;GO:0048519;GO:0006177;GO:0051053;GO:0006283;GO:0006281;GO:0060255;GO:0046037;GO:0090296;GO:0006288;GO:0006289;GO:0043436;GO:0046129;GO:0046128;GO:0042455;GO:0046483;GO:1901564;GO:1901566;GO:0006271;GO:0006275;GO:0002376;GO:…	K10776	LIG3	hsa03410	Base excision repair	COG1793	L:Replication, recombination and repair	PF01068.18;PF04675.11;PF16759.2;PF00645.15;PF04679.12;PF16589.2	DNA_ligase_A_M;DNA_ligase_A_N;LIG3_BRCT;zf-PARP;DNA_ligase_A_C;BRCT_2	ATP dependent DNA ligase domain;DNA ligase N terminus;DNA ligase 3 BRCT domain;Pol;ATP dependent DNA ligase C terminal region;BRCT domain, a BRCA1 C-terminus domain	cytoplasmic	5	7	112.8	High
J3QQJ0	SAP30-binding protein (Fragment) OS=Homo sapiens OX=9606 GN=SAP30BP PE=1 SV=1	0.756073	-0.403403	0.03821	down	yes	0.747	0.988	BP:regulation of primary metabolic process;BP:regulation of metabolic process;BP:regulation of cellular biosynthetic process;BP:regulation of cellular metabolic process;BP:positive regulation of cell death;BP:cell death;BP:regulation of cell death;BP:single-organism process;BP:regulation of cellular macromolecule biosynthetic process;BP:regulation of biological process;BP:regulation of nucleobase…	GO:0080090;GO:0019222;GO:0031326;GO:0031323;GO:0010942;GO:0008219;GO:0010941;GO:0044699;GO:2000112;GO:0050789;GO:0019219;GO:0065007;GO:0048518;GO:0010468;GO:0006915;GO:0060255;GO:0009987;GO:0009889;GO:1903506;GO:0050794;GO:0012501;GO:0044763;GO:0051171;GO:2001141;GO:0051252;GO:0006355;GO:0010556;GO:0008150;GO:0048522;GO:0043229;GO:0043228;GO:0043226;GO:0005856;GO:0005575;GO:0045111;GO:0005654;GO:…	------	------	------	------	------	------	PF07818.10	HCNGP	HCNGP-like protein	cytoplasmic	2	8	35.9	High
E9PLP8	Cleavage stimulation factor subunit 3 OS=Homo sapiens OX=9606 GN=CSTF3 PE=1 SV=2	0.77289	-0.371665	0.01271	down	yes	0.7555	0.9775	BP:RNA biosynthetic process;BP:RNA splicing, via transesterification reactions with bulged adenosine as nucleophile;BP:nucleic acid metabolic process;BP:nucleobase-containing compound biosynthetic process;BP:cellular nitrogen compound metabolic process;BP:nitrogen compound metabolic process;BP:cellular metabolic process;BP:RNA polyadenylation;BP:organic substance biosynthetic process;BP:organic c…	GO:0032774;GO:0000377;GO:0090304;GO:0034654;GO:0034641;GO:0006807;GO:0044237;GO:0043631;GO:1901576;GO:1901362;GO:0044699;GO:0044267;GO:0044710;GO:0006486;GO:0016071;GO:0071704;GO:1901360;GO:0031124;GO:0006369;GO:0008380;GO:0018130;GO:0090305;GO:0006139;GO:0006725;GO:0009987;GO:0070085;GO:0006464;GO:0000375;GO:0043412;GO:0043413;GO:0044763;GO:0031123;GO:0008152;GO:0044723;GO:0044271;GO:0009059;GO:…	K14408	CSTF3, RNA14	hsa03015	mRNA surveillance pathway	COG5107	A:RNA processing and modification	PF05843.11	Suf	Suppressor of forked protein	cytoplasmic	11	19	86.2	High
E7EVC7	Autophagy-related protein 16-1 OS=Homo sapiens OX=9606 GN=ATG16L1 PE=1 SV=1	0.797718	-0.32605	0.04935	down	yes	0.769	0.964	------	------	------	------	------	------	------	------	PF08614.8;PF00400.29;PF12894.4	ATG16;WD40;ANAPC4_WD40	Autophagy protein 16;WD domain, G-beta repeat;Anaphase-promoting complex subunit 4 WD40 domain	cytoplasmic	2	8	70	High
P68133	Actin, alpha skeletal muscle OS=Homo sapiens OX=9606 GN=ACTA1 PE=1 SV=1	0.717758	-0.478431	0.01071	down	yes	0.7235	1.008	BP:regulation of metabolic process;BP:cell development;BP:muscle system process;BP:cellular component organization or biogenesis;BP:cellular response to stimulus;BP:response to inorganic substance;BP:positive regulation of macromolecule metabolic process;BP:cellular developmental process;BP:response to mechanical stimulus;BP:positive regulation of biological process;BP:muscle contraction;BP:regul…	GO:0019222;GO:0048468;GO:0003012;GO:0071840;GO:0051716;GO:0010035;GO:0010604;GO:0048869;GO:0009612;GO:0048518;GO:0006936;GO:0060255;GO:0030049;GO:0030048;GO:0010033;GO:0003008;GO:0009605;GO:0010243;GO:0009725;GO:0044707;GO:0009893;GO:0006928;GO:0050789;GO:0016049;GO:0016043;GO:0048741;GO:0065007;GO:0014070;GO:0009719;GO:0008150;GO:0044767;GO:1901698;GO:1901699;GO:0010038;GO:0070887;GO:0010226;GO:…	K12314;K12315;K10354	ACTC1;ACTA1;ACTG2	hsa05410;hsa05414;hsa04260;hsa04261;hsa04270	Hypertrophic cardiomyopath;Dilated cardiomyopathy;Cardiac muscle contraction;Adrenergic signaling in cardiomyocytes;Vascular smooth muscle contraction	COG5277	Z:Cytoskeleton	PF00022.16	Actin	Actin	cytoplasmic	1	49	42	High
Q9P0J1	[Pyruvate dehydrogenase [acetyl-transferring]]-phosphatase 1, mitochondrial OS=Homo sapiens OX=9606 GN=PDP1 PE=1 SV=3	0.745464	-0.42379	0.01911	down	yes	0.7395	0.992	BP:negative regulation of apoptotic signaling pathway;BP:protein localization;BP:regulation of primary metabolic process;BP:regulation of metabolic process;BP:regulation of apoptotic signaling pathway;BP:regulation of acetyl-CoA biosynthetic process from pyruvate;BP:protein dephosphorylation;BP:negative regulation of response to stimulus;BP:regulation of RNA biosynthetic process;BP:regulation of …	GO:2001234;GO:0008104;GO:0080090;GO:0019222;GO:2001233;GO:0010510;GO:0006470;GO:0048585;GO:2001141;GO:0048583;GO:2000113;GO:0045039;GO:0007165;GO:0007166;GO:0007007;GO:0007006;GO:0007005;GO:0042762;GO:0051716;GO:0010605;GO:0009968;GO:0070727;GO:0009966;GO:0010257;GO:0022900;GO:0044093;GO:0022904;GO:0043281;GO:0048519;GO:0033036;GO:0010565;GO:0051196;GO:0071300;GO:0060255;GO:0060548;GO:0045184;GO:…	K01102	PDP	------	------	COG0631	T:Signal transduction mechanisms	PF00481.18	PP2C	Protein phosphatase 2C	mitochondrial	8	29	61	High
Q96GK7	Fumarylacetoacetate hydrolase domain-containing protein 2A OS=Homo sapiens OX=9606 GN=FAHD2A PE=1 SV=1	0.784132	-0.350832	0.02185	down	yes	0.761	0.9705	BP:biological_process;BP:metabolic process;CC:intracellular organelle;CC:membrane-bounded organelle;CC:organelle;CC:mitochondrion;CC:intracellular membrane-bounded organelle;CC:cell part;CC:cellular_component;CC:cytoplasmic part;CC:intracellular part;MF:molecular_function;MF:binding;MF:methyltransferase activity;MF:cation binding;MF:ion binding;MF:transferase activity;MF:transferase activity, tra…	GO:0008150;GO:0008152;GO:0043229;GO:0043227;GO:0043226;GO:0005739;GO:0043231;GO:0044464;GO:0005575;GO:0044444;GO:0044424;GO:0003674;GO:0005488;GO:0008168;GO:0043169;GO:0043167;GO:0016740;GO:0016741;GO:0046872;GO:0016787;GO:0008757;GO:0016300;GO:0008173;GO:0030696;GO:0030697;GO:0008175;GO:0003824	------	------	------	------	COG0179	Q:Secondary metabolites biosynthesis, transport and catabolism	PF01557.15	FAA_hydrolase	Fumarylacetoacetate	mitochondrial	1	32	34.6	High
O75348	V-type proton ATPase subunit G 1 OS=Homo sapiens OX=9606 GN=ATP6V1G1 PE=1 SV=3	0.767739	-0.381313	0.02679	down	yes	0.752	0.9795	BP:protein localization;BP:regulation of metabolic process;BP:regulation of response to stimulus;BP:iron ion homeostasis;BP:iron ion transport;BP:signal transduction;BP:cell surface receptor signaling pathway;BP:enzyme linked receptor protein signaling pathway;BP:inorganic ion homeostasis;BP:transmembrane receptor protein tyrosine kinase signaling pathway;BP:cellular component organization or bio…	GO:0008104;GO:0019222;GO:0048583;GO:0055072;GO:0006826;GO:0007165;GO:0007166;GO:0007167;GO:0098771;GO:0007169;GO:0071840;GO:0051716;GO:0033036;GO:0019725;GO:0045851;GO:0045184;GO:0048878;GO:0050789;GO:0009894;GO:0022607;GO:0006457;GO:0055076;GO:0015992;GO:0006885;GO:0016043;GO:0065003;GO:0071453;GO:0065007;GO:0098662;GO:0098660;GO:0065008;GO:0006818;GO:0006812;GO:0006811;GO:0006810;GO:0050794;GO:…	K02152	ATPeV1G, ATP6G	hsa05120;hsa04966;hsa00190;hsa05323;hsa04721;hsa04145;hsa05110;hsa04150	Epithelial cell signaling in Helicobacter pylori infection;Collecting duct acid secretion;Oxidative phosphorylation;Rheumatoid arthritis;Synaptic vesicle cycle;Phagosome;Vibrio cholerae infection;mTOR signaling pathway	------	------	PF03179.12	V-ATPase_G	Vacuolar	cytoplasmic	4	38	13.7	High
O95149	Snurportin-1 OS=Homo sapiens OX=9606 GN=SNUPN PE=1 SV=1	0.763627	-0.38906	0.007323	down	yes	0.7495	0.9815	BP:nuclear transport;BP:protein localization;BP:protein dephosphorylation;BP:cellular component organization or biogenesis;BP:cellular macromolecule localization;BP:macromolecule localization;BP:organic substance transport;BP:protein import into nucleus;BP:snRNA import into nucleus;BP:establishment of protein localization;BP:protein metabolic process;BP:cellular component assembly;BP:cellular pro…	GO:0051169;GO:0008104;GO:0006470;GO:0071840;GO:0070727;GO:0033036;GO:0071702;GO:0006606;GO:0061015;GO:0045184;GO:0019538;GO:0022607;GO:0044267;GO:0000387;GO:0044260;GO:0006886;GO:0016043;GO:0065003;GO:0006810;GO:0043412;GO:0036211;GO:0008150;GO:0008152;GO:0051236;GO:0051234;GO:0050658;GO:0046907;GO:0051030;GO:0050657;GO:0015931;GO:0016311;GO:0035335;GO:0044699;GO:0022618;GO:1902593;GO:0072594;GO:…	K13151	SNUPN, RNUT1	hsa03013	RNA transport	------	------	PF11538.5	Snurportin1	Snurportin1	cytoplasmic	1	3	41.1	High
O14787	Transportin-2 OS=Homo sapiens OX=9606 GN=TNPO2 PE=1 SV=3	0.750253	-0.414551	0.03081	down	yes	0.742	0.989	BP:nuclear transport;BP:protein localization;BP:cellular component organization or biogenesis;BP:cellular macromolecule localization;BP:blood vessel morphogenesis;BP:macromolecule localization;BP:protein import into nucleus;BP:NLS-bearing protein import into nucleus;BP:establishment of protein localization;BP:cellular component assembly;BP:ribosomal protein import into nucleus;BP:intracellular pr…	GO:0051169;GO:0008104;GO:0071840;GO:0070727;GO:0048514;GO:0033036;GO:0006606;GO:0006607;GO:0045184;GO:0022607;GO:0006610;GO:0006886;GO:0016043;GO:0065003;GO:0048646;GO:0009887;GO:0006461;GO:0006810;GO:0008150;GO:0051234;GO:0046907;GO:0072594;GO:0009653;GO:0044699;GO:0032502;GO:0017038;GO:0000059;GO:0033365;GO:0034504;GO:0043933;GO:0034622;GO:0060978;GO:0001525;GO:0071822;GO:0048844;GO:1902593;GO:…	K18727	TNPO2, IPO3, KPNB2B	------	------	------	------	PF13513.3;PF02985.19;PF13646.3;PF12717.4;PF00514.20;PF03810.16;PF12755.4;PF01602.17	HEAT_EZ;HEAT;HEAT_2;Cnd1;Arm;IBN_N;Vac14_Fab1_bd;Adaptin_N	HEAT-like repeat;HEAT repeat;HEAT repeats;non-SMC mitotic condensation complex subunit 1;Armadillo/beta-catenin-like repeat;Importin-beta N-terminal domain;Vacuolar 14 Fab1-binding region;Adaptin N terminal region	cytoplasmic	2	10	101.3	High
Q14534	Squalene monooxygenase OS=Homo sapiens OX=9606 GN=SQLE PE=1 SV=3	0.774641	-0.368401	0.01978	down	yes	0.7545	0.974	BP:regulation of metabolic process;BP:small molecule metabolic process;BP:small molecule biosynthetic process;BP:organic cyclic compound biosynthetic process;BP:organic cyclic compound metabolic process;BP:single-organism metabolic process;BP:single-organism biosynthetic process;BP:regulation of cholesterol biosynthetic process;BP:secondary alcohol biosynthetic process;BP:secondary alcohol metabo…	GO:0019222;GO:0044281;GO:0044283;GO:1901362;GO:1901360;GO:0044710;GO:0044711;GO:0045540;GO:1902653;GO:1902652;GO:0010033;GO:0055114;GO:0044707;GO:0090181;GO:0050789;GO:1901576;GO:0019216;GO:0065007;GO:0044699;GO:1902930;GO:0006629;GO:0009889;GO:0050810;GO:0008152;GO:0044767;GO:0012501;GO:0050896;GO:0006695;GO:0006694;GO:0008150;GO:1901617;GO:1901615;GO:0016126;GO:0016125;GO:0046165;GO:0009987;GO:…	K00511	SQLE, ERG1	hsa00100	Steroid biosynthesis	COG0654;COG0654	C:Energy production and conversion;H:Coenzyme transport and metabolism	PF08491.7;PF01494.16;PF01266.21	SE;FAD_binding_3;DAO	Squalene epoxidase;FAD binding domain;FAD dependent oxidoreductase	ER	2	8	63.9	High
P29558	RNA-binding motif, single-stranded-interacting protein 1 OS=Homo sapiens OX=9606 GN=RBMS1 PE=1 SV=3	0.734069	-0.446012	0.03332	down	yes	0.7315	0.9965	BP:regulation of metabolic process;BP:regulation of protein metabolic process;BP:regulation of cellular metabolic process;BP:nucleic acid metabolic process;BP:cellular biosynthetic process;BP:cellular nitrogen compound metabolic process;BP:nitrogen compound metabolic process;BP:cellular macromolecule biosynthetic process;BP:organic cyclic compound metabolic process;BP:regulation of primary metabo…	GO:0019222;GO:0051246;GO:0031323;GO:0090304;GO:0044249;GO:0034641;GO:0006807;GO:0034645;GO:1901360;GO:0080090;GO:0006139;GO:0044260;GO:0010608;GO:2000112;GO:0050789;GO:0071704;GO:0006260;GO:0031326;GO:0010468;GO:1901576;GO:0060255;GO:0009889;GO:0009987;GO:0006725;GO:0034248;GO:0009058;GO:0009059;GO:0008150;GO:0051171;GO:0008152;GO:0050794;GO:0046483;GO:0016070;GO:0044238;GO:0032268;GO:0006417;GO:…	------	------	------	------	------	------	PF00076.19	RRM_1	RNA recognition motif.	cytoplasmic	1	6	44.5	High
Q9Y6E0	Serine/threonine-protein kinase 24 OS=Homo sapiens OX=9606 GN=STK24 PE=1 SV=1	0.747219	-0.420396	0.02886	down	yes	0.739	0.989	BP:negative regulation of T cell proliferation;BP:regulation of phosphate metabolic process;BP:regulation of primary metabolic process;BP:negative regulation of homotypic cell-cell adhesion;BP:regulation of homotypic cell-cell adhesion;BP:positive regulation of response to stimulus;BP:regulation of response to stimulus;BP:activation of protein kinase activity;BP:negative regulation of organelle o…	GO:0042130;GO:0019220;GO:0080090;GO:0034111;GO:0034110;GO:0048584;GO:0048583;GO:0032147;GO:0010639;GO:0051985;GO:0007162;GO:0007165;GO:0010965;GO:0031344;GO:0071840;GO:0009267;GO:0044710;GO:0045786;GO:0019222;GO:0009966;GO:0009967;GO:0000165;GO:0043067;GO:0033043;GO:0045664;GO:0048513;GO:0048869;GO:0044093;GO:0048518;GO:0065007;GO:0031324;GO:0042127;GO:0032269;GO:0032434;GO:0010605;GO:1902100;GO:…	K08838	STK24_25_MST4	------	------	------	------	PF00069.22;PF07714.14	Pkinase;Pkinase_Tyr	Protein kinase domain;Protein tyrosine kinase	cytoplasmic	2	9	49.3	High
Q14691	DNA replication complex GINS protein PSF1 OS=Homo sapiens OX=9606 GN=GINS1 PE=1 SV=1	0.619494	-0.690838	0.02993	down	yes	0.661	1.067	BP:DNA strand elongation involved in nuclear cell cycle DNA replication;BP:organic cyclic compound metabolic process;BP:single-organism metabolic process;BP:cellular component organization or biogenesis;BP:DNA replication;BP:DNA geometric change;BP:ncRNA processing;BP:maturation of 5.8S rRNA;BP:maturation of SSU-rRNA from tricistronic rRNA transcrip;BP:maturation of 5.8S rRNA from tricistronic rR…	GO:1902319;GO:1901360;GO:0044710;GO:0071840;GO:0006260;GO:0032392;GO:0034470;GO:0000460;GO:0000462;GO:0000466;GO:0046483;GO:0006271;GO:0071103;GO:0006807;GO:0034660;GO:1901576;GO:0044260;GO:0016043;GO:0006364;GO:0008150;GO:0008152;GO:0016070;GO:0016071;GO:0016072;GO:0044249;GO:0034641;GO:0034645;GO:0044699;GO:0006139;GO:0022616;GO:0008283;GO:0032508;GO:0009987;GO:0006725;GO:1902983;GO:0030490;GO:…	K10732	GINS1, PSF1	------	------	COG5230	S:Function unknown	------	------	------	cytoplasmic	1	7	23	Medium
F5GZG1	Ras-related protein Rap-1b (Fragment) OS=Homo sapiens OX=9606 GN=RAP1B PE=1 SV=8	0.737425	-0.439433	0.04212	down	yes	0.733	0.994	BP:regulation of phosphate metabolic process;BP:regulation of primary metabolic process;BP:regulation of metabolic process;BP:regulation of ERK1 and ERK2 cascade;BP:negative regulation of secretion;BP:regulation of transport;BP:regulation of intracellular transport;BP:positive regulation of response to stimulus;BP:cell development;BP:signal transduction;BP:establishment of endothelial barrier;BP:…	GO:0019220;GO:0080090;GO:0019222;GO:0070372;GO:0051048;GO:0051049;GO:0032386;GO:0048584;GO:0048468;GO:0007165;GO:0061028;GO:0071840;GO:0051716;GO:0009966;GO:0048869;GO:0045955;GO:0009967;GO:0048518;GO:0048519;GO:0002064;GO:0051051;GO:1901888;GO:0060255;GO:0048583;GO:0042327;GO:0051591;GO:0043434;GO:0050804;GO:0010033;GO:0042325;GO:0065008;GO:0071320;GO:1903531;GO:0009725;GO:0010243;GO:0001505;GO:…	K04353;K07836	RAP1B;RAP1A	hsa04530;hsa04972;hsa04611;hsa05211;hsa04024;hsa04670;hsa04720;hsa04015;hsa04014;hsa04510;hsa04010;hsa04722;hsa04062	Tight junction;Pancreatic secretion;Platelet activation;Renal cell carcinoma;cAMP signaling pathway;Leukocyte transendothelial migration;Long-term potentiation;Rap1 signaling pathway;Ras signaling pathway;Focal adhesion;MAPK signaling pathway;Neurotrophin signaling pathway;Chemokine signaling pathway	COG1100	R:General function prediction only	PF00071.19;PF08477.10	Ras;Roc	Ras family;Ras of Complex, Roc, domain of DAPkinase	cytoplasmic	1	47	13.8	High
H0YMV8	40S ribosomal protein S27 OS=Homo sapiens OX=9606 GN=RPS27L PE=1 SV=1	0.78686	-0.345821	0.02883	down	yes	0.7605	0.9665	BP:organonitrogen compound biosynthetic process;BP:primary metabolic process;BP:cellular biosynthetic process;BP:cellular macromolecule biosynthetic process;BP:organic substance biosynthetic process;BP:single-organism process;BP:single-organism metabolic process;BP:cellular nitrogen compound biosynthetic process;BP:cellular macromolecule metabolic process;BP:peptide biosynthetic process;BP:organi…	GO:1901566;GO:0044238;GO:0044249;GO:0034645;GO:1901576;GO:0044699;GO:0044710;GO:0044271;GO:0044260;GO:0043043;GO:0071704;GO:0043170;GO:0044267;GO:0009987;GO:0009058;GO:0009059;GO:0008150;GO:0008152;GO:1901564;GO:0055114;GO:0043604;GO:0019538;GO:0034641;GO:0044237;GO:0006807;GO:0043603;GO:0006518;GO:0006412;GO:1990904;GO:0043229;GO:0043228;GO:0030529;GO:0043226;GO:0032991;GO:0005840;GO:0043232;GO:…	K02978	RP-S27e, RPS27	hsa03010	Ribosome	COG2051	J:Translation, ribosomal structure and biogenesis	PF01667.14	Ribosomal_S27e	Ribosomal protein S27	ER	1	32	11.3	High
Q9NS62	Thrombospondin type-1 domain-containing protein 1 OS=Homo sapiens OX=9606 GN=THSD1 PE=2 SV=1	0.712798	-0.488436	0.04168	down	yes	0.7185	1.008	BP:regulation of transport;BP:muscle system process;BP:signal transduction;BP:regulation of ion transmembrane transport;BP:regulation of transmembrane transport;BP:potassium ion export;BP:muscle contraction;BP:response to calcium ion;BP:regulation of potassium ion transmembrane transport;BP:response to metal ion;BP:response to inorganic substance;BP:system process;BP:single organism signaling;BP:…	GO:0051049;GO:0003012;GO:0007165;GO:0034765;GO:0034762;GO:0071435;GO:0006936;GO:0051592;GO:1901379;GO:0010038;GO:0010035;GO:0003008;GO:0044700;GO:0044707;GO:0061024;GO:0098916;GO:0042391;GO:0032412;GO:1904062;GO:0044802;GO:0050789;GO:0016043;GO:0065007;GO:0098662;GO:0098660;GO:0065009;GO:0065008;GO:0008016;GO:0006813;GO:0006812;GO:0006811;GO:0006810;GO:0050794;GO:0008150;GO:0051239;GO:0051234;GO:…	------	------	------	------	------	------	PF00090.16	TSP_1	Thrombospondin type 1 domain	plasma membrane	1	1	94.5	Medium
P25106	Atypical chemokine receptor 3 OS=Homo sapiens OX=9606 GN=ACKR3 PE=1 SV=3	0.70504	-0.504224	0.0279	down	yes	0.7135	1.012	BP:regulation of secretion;BP:positive regulation of secretion;BP:regulation of transport;BP:positive regulation of neutrophil activation;BP:positive regulation of leukocyte mediated immunity;BP:regulation of leukocyte mediated immunity;BP:small molecule metabolic process;BP:regulation of neutrophil activation;BP:small molecule biosynthetic process;BP:cellular response to stimulus;BP:regulation o…	GO:0051046;GO:0051047;GO:0051049;GO:1902565;GO:0002705;GO:0002703;GO:0044281;GO:1902563;GO:0044283;GO:0051716;GO:1904298;GO:0043207;GO:1902932;GO:0060548;GO:0043902;GO:1905322;GO:0042327;GO:0009607;GO:0009605;GO:0009609;GO:0009608;GO:1904994;GO:0032414;GO:0009893;GO:0032412;GO:0009891;GO:0010863;GO:0050789;GO:0045987;GO:0051345;GO:0045408;GO:0006887;GO:0002687;GO:0002684;GO:0002685;GO:0002682;GO:…	K04304	CXCR7, RDC1	hsa04060	Cytokine-cytokine receptor interaction	------	------	PF00001.18	7tm_1	7 transmembrane receptor	cytoplasmic	1	4	41.5	High
A0A3B3ITJ4	Heterogeneous nuclear ribonucleoprotein L (Fragment) OS=Homo sapiens OX=9606 GN=HNRNPL PE=1 SV=1	0.766906	-0.382879	0.03128	down	yes	0.7485	0.976	BP:regulation of primary metabolic process;BP:regulation of metabolic process;BP:regulation of mRNA processing;BP:regulation of cellular metabolic process;BP:regulation of mRNA splicing, via spliceosome;BP:regulation of biological process;BP:regulation of alternative mRNA splicing, via spliceosome;BP:regulation of RNA splicing;BP:regulation of nucleobase-containing compound metabolic process;BP:b…	GO:0080090;GO:0019222;GO:0050684;GO:0031323;GO:0048024;GO:0050789;GO:0000381;GO:0043484;GO:0019219;GO:0065007;GO:0010468;GO:0060255;GO:0050794;GO:0008150;GO:0051171;GO:0051252;GO:1903311;GO:0035770;GO:0043226;GO:0043229;GO:0043228;GO:1990904;GO:0005654;GO:0030529;GO:0032991;GO:0005575;GO:0043232;GO:0044464;GO:0044446;GO:0044428;GO:0044424;GO:0044422;GO:0003674;GO:0005488;GO:0003676;GO:0003677;GO:…	------	------	------	------	------	------	PF13893.3;PF00076.19	RRM_5;RRM_1	RNA recognition motif.;RNA recognition motif.	cytoplasmic	1	54	59.2	High
P03928	ATP synthase protein 8 OS=Homo sapiens OX=9606 GN=MT-ATP8 PE=1 SV=1	0.65499	-0.610454	0.01473	down	yes	0.6825	1.042	BP:purine ribonucleoside monophosphate metabolic process;BP:nucleotide biosynthetic process;BP:small molecule metabolic process;BP:ribonucleoside monophosphate metabolic process;BP:organic cyclic compound biosynthetic process;BP:purine nucleoside biosynthetic process;BP:organic cyclic compound metabolic process;BP:mitochondrion organization;BP:single-organism metabolic process;BP:single-organism …	GO:0009167;GO:0009165;GO:0044281;GO:0009161;GO:1901362;GO:0042451;GO:1901360;GO:0007005;GO:0044710;GO:0044711;GO:1990542;GO:0009199;GO:0098662;GO:0009206;GO:0009205;GO:0009201;GO:0046034;GO:0098660;GO:0007006;GO:0006839;GO:0046129;GO:0046128;GO:0042455;GO:0046483;GO:1901564;GO:1901566;GO:0061024;GO:0006163;GO:0006164;GO:0019637;GO:0009163;GO:0009142;GO:0009144;GO:0009145;GO:1902589;GO:0006807;GO:…	K02125	ATPeF08, MTATP8, ATP8	hsa05016;hsa05010;hsa05012;hsa00190	Huntington's disease;Alzheimer's disease;Parkinson's disease;Oxidative phosphorylation	------	------	PF00895.17	ATP-synt_8	ATP synthase protein 8	extracellular	1	16	8	Medium
Q9UJW0	Dynactin subunit 4 OS=Homo sapiens OX=9606 GN=DCTN4 PE=1 SV=1	0.778236	-0.36172	0.02883	down	yes	0.7545	0.9695	BP:positive regulation of multicellular organismal process;BP:regulation of metabolic process;BP:cellular response to stimulus;BP:positive regulation of macromolecule metabolic process;BP:response to external biotic stimulus;BP:establishment of nucleus localization;BP:cellular developmental process;BP:positive regulation of biological process;BP:regulation of macromolecule metabolic process;BP:po…	GO:0051240;GO:0019222;GO:0051716;GO:0010604;GO:0043207;GO:0040023;GO:0048869;GO:0048518;GO:0060255;GO:0010628;GO:2001141;GO:0051707;GO:0010033;GO:0046483;GO:0002504;GO:0009607;GO:0016192;GO:0000398;GO:0002376;GO:0009893;GO:0050789;GO:0006807;GO:0048002;GO:0051656;GO:0006888;GO:0044260;GO:0065007;GO:1901360;GO:0045893;GO:0019882;GO:0019884;GO:0034097;GO:0019886;GO:0006810;GO:0009889;GO:0050794;GO:…	K10426	DCTN4	hsa04962;hsa05016	Vasopressin-regulated water reabsorption;Huntington's disease	------	------	PF05502.10	Dynactin_p62	Dynactin p62 family	cytoplasmic	3	16	52.3	High
Q92530	Proteasome inhibitor PI31 subunit OS=Homo sapiens OX=9606 GN=PSMF1 PE=1 SV=2	0.781912	-0.354922	0.04184	down	yes	0.7565	0.9675	BP:regulation of metabolic process;BP:negative regulation of response to stimulus;BP:positive regulation of response to stimulus;BP:regulation of response to stimulus;BP:behavior;BP:learning or memory;BP:positive regulation of defense response;BP:regulation of Wnt signaling pathway;BP:signal transduction;BP:cell surface receptor signaling pathway;BP:enzyme linked receptor protein signaling pathwa…	GO:0019222;GO:0048585;GO:0048584;GO:0048583;GO:0007610;GO:0007611;GO:0031349;GO:0030111;GO:0007165;GO:0007166;GO:0007167;GO:0007169;GO:0023014;GO:0019221;GO:0031330;GO:0051346;GO:0044710;GO:0010605;GO:0010604;GO:0009968;GO:0009966;GO:0009967;GO:0000165;GO:0070646;GO:0032446;GO:0033238;GO:0044093;GO:0044092;GO:0048518;GO:0048519;GO:0060255;GO:1904667;GO:0050776;GO:0030162;GO:0030163;GO:0097485;GO:…	K06700	PSMF1	hsa03050	Proteasome	------	------	PF11566.5;PF08577.8	PI31_Prot_N;PI31_Prot_C	PI31 proteasome regulator N-terminal;PI31 proteasome regulator	cytoplasmic	2	8	29.8	High
P37173	TGF-beta receptor type-2 OS=Homo sapiens OX=9606 GN=TGFBR2 PE=1 SV=2	0.76848	-0.379919	0.02089	down	yes	0.7485	0.974	BP:regulation of phosphate metabolic process;BP:outflow tract morphogenesis;BP:cellular response to stimulus;BP:regulation of metabolic process;BP:response to hypoxia;BP:developmental cell growth;BP:peptidyl-threonine modification;BP:positive regulation of stem cell differentiation;BP:animal organ regeneration;BP:cell development;BP:regulation of protein kinase activity;BP:germ cell development;B…	GO:0019220;GO:0003151;GO:0051716;GO:0019222;GO:0001666;GO:0048588;GO:0018210;GO:2000738;GO:0031100;GO:0048468;GO:0045859;GO:0007281;GO:0001755;GO:0010634;GO:0042327;GO:0009605;GO:0019538;GO:0042693;GO:0042692;GO:0048562;GO:0048565;GO:0009893;GO:0009891;GO:0048568;GO:1901342;GO:0010862;GO:0050789;GO:0003206;GO:0051347;GO:0003203;GO:2000017;GO:0003208;GO:2000015;GO:0002684;GO:0002682;GO:0022603;GO:…	K04388	TGFBR2	hsa04350;hsa04659;hsa05220;hsa05212;hsa05210;hsa04010;hsa05200;hsa05202;hsa05142;hsa04520;hsa04390;hsa04144;hsa04068;hsa04380;hsa05166;hsa04060;hsa04933	TGF-beta signaling pathway;Th17 cell differentiation;Chronic myeloid leukemia;Pancreatic cancer;Colorectal cancer;MAPK signaling pathway;Pathways in cancer;Transcriptional misregulation in cancer;Chagas diseas;Adherens junction;Hippo signaling pathway;Endocytosis;FoxO signaling pathway;Osteoclast differentiation;HTLV-I infection;Cytokine-cytokine receptor interaction;AGE-RAGE signaling pathway in…	------	------	PF08917.7;PF07714.14;PF00069.22	ecTbetaR2;Pkinase_Tyr;Pkinase	Transforming growth factor beta receptor 2 ectodomain;Protein tyrosine kinase;Protein kinase domain	plasma membrane	1	2	64.5	Medium
Q9NQH7	Xaa-Pro aminopeptidase 3 OS=Homo sapiens OX=9606 GN=XPNPEP3 PE=1 SV=1	0.791363	-0.337588	0.03875	down	yes	0.7605	0.961	BP:regulation of intracellular protein transport;BP:protein localization;BP:hemostasis;BP:regulation of transport;BP:regulation of intracellular transport;BP:blood coagulation;BP:membrane organization;BP:renal system process;BP:positive regulation of intracellular transport;BP:cellular component organization or biogenesis;BP:cellular developmental process;BP:glomerular filtration;BP:epithelial ce…	GO:0033157;GO:0008104;GO:0007599;GO:0051049;GO:0032386;GO:0007596;GO:0061024;GO:0003014;GO:0032388;GO:0071840;GO:0048869;GO:0003094;GO:0030855;GO:0048518;GO:0032438;GO:0002065;GO:0051050;GO:0050931;GO:0048073;GO:0048070;GO:0045184;GO:1903955;GO:0003008;GO:0044707;GO:0019538;GO:0010638;GO:0016050;GO:0022607;GO:0048087;GO:1903651;GO:0050821;GO:0051222;GO:0051223;GO:0006886;GO:0016043;GO:0065007;GO:…	K01262	pepP	------	------	COG0006	E:Amino acid transport and metabolism	PF00557.21;PF05195.13	Peptidase_M24;AMP_N	Metallopeptidase family M24;Aminopeptidase P, N-terminal domain	mitochondrial	6	20	57	High
O15020	Spectrin beta chain, non-erythrocytic 2 OS=Homo sapiens OX=9606 GN=SPTBN2 PE=1 SV=3	0.782902	-0.353097	0.0355	down	yes	0.7555	0.965	BP:regulation of cytoskeleton organization;BP:developmental growth;BP:behavior;BP:regulation of actin polymerization or depolymerization;BP:negative regulation of cytoskeleton organization;BP:signal transduction;BP:multicellular organism growth;BP:single-organism metabolic process;BP:cellular component organization or biogenesis;BP:MAPK cascade;BP:positive regulation of molecular function;BP:nega…	GO:0051493;GO:0048589;GO:0007610;GO:0008064;GO:0051494;GO:0007165;GO:0035264;GO:0044710;GO:0071840;GO:0000165;GO:0044093;GO:0048519;GO:0021692;GO:1901880;GO:0002495;GO:0097485;GO:0065009;GO:0016192;GO:0002504;GO:0044707;GO:0019538;GO:0044708;GO:0010639;GO:0002376;GO:0031333;GO:0032535;GO:0022607;GO:1901879;GO:0006928;GO:0043244;GO:0048002;GO:0035556;GO:0050789;GO:0044267;GO:0006888;GO:0043547;GO:…	K06115	SPTB	------	------	COG5069	Z:Cytoskeleton	PF00435.18;PF00307.28;PF15410.3;PF00169.26;PF11971.5	Spectrin;CH;PH_9;PH;CAMSAP_CH	Spectrin repeat;Calponin homology;Pleckstrin homology domain;PH domain;CAMSAP CH domain	cytoplasmic	11	12	271.2	High
Q9Y4B5	Microtubule cross-linking factor 1 OS=Homo sapiens OX=9606 GN=MTCL1 PE=1 SV=5	0.745814	-0.423112	0.005237	down	yes	0.735	0.9855	BP:regulation of intracellular protein transport;BP:positive regulation of intracellular transport;BP:regulation of metabolic process;BP:regulation of transport;BP:regulation of intracellular transport;BP:establishment or maintenance of cell polarity;BP:cellular component organization or biogenesis;BP:positive regulation of molecular function;BP:positive regulation of biological process;BP:positi…	GO:0033157;GO:0032388;GO:0019222;GO:0051049;GO:0032386;GO:0007163;GO:0071840;GO:0044093;GO:0048518;GO:0051050;GO:0009894;GO:0061245;GO:0045197;GO:0051222;GO:0051223;GO:0050789;GO:0035088;GO:1904951;GO:0051345;GO:0016043;GO:0065007;GO:1903829;GO:0065009;GO:0051130;GO:0070201;GO:0050790;GO:0050794;GO:0008150;GO:0051336;GO:0043085;GO:0051128;GO:1903827;GO:1903533;GO:0044699;GO:0032880;GO:0060341;GO:…	------	------	------	------	------	------	PF11365.5;PF14818.3	DUF3166;DUF4482	Protein of unknown function;Domain of unknown function	cytoplasmic	1	1	209.4	Medium
I3L2E1	Clusterin-associated protein 1 OS=Homo sapiens OX=9606 GN=CLUAP1 PE=4 SV=1	0.607009	-0.720209	0.02909	down	yes	0.6495	1.07	------	------	------	------	------	------	------	------	------	------	------	mitochondrial	1	17	5	Medium
Q02127	Dihydroorotate dehydrogenase (quinone), mitochondrial OS=Homo sapiens OX=9606 GN=DHODH PE=1 SV=3	0.783195	-0.352557	0.02975	down	yes	0.755	0.964	BP:lactation;BP:nucleotide biosynthetic process;BP:small molecule metabolic process;BP:pyrimidine nucleoside monophosphate biosynthetic process;BP:pyrimidine nucleoside biosynthetic process;BP:organic cyclic compound biosynthetic process;BP:single-multicellular organism process;BP:organic cyclic compound metabolic process;BP:response to L-arginine;BP:response to amino acid;BP:single-organism meta…	GO:0007595;GO:0009165;GO:0044281;GO:0009130;GO:0046134;GO:1901362;GO:0044707;GO:1901360;GO:1903576;GO:0043200;GO:0044710;GO:0044711;GO:0019856;GO:0044205;GO:0009218;GO:0042455;GO:0048518;GO:0051704;GO:0009174;GO:0009173;GO:0051128;GO:0010033;GO:0055114;GO:0046483;GO:0044703;GO:1901564;GO:0009605;GO:1901566;GO:0044706;GO:0010243;GO:0031667;GO:0019438;GO:0009163;GO:0022603;GO:0042493;GO:0009124;GO:…	K00254	DHODH, pyrD	hsa00240	Pyrimidine metabolism	COG0167	F:Nucleotide transport and metabolism	PF01180.18	DHO_dh	Dihydroorotate dehydrogenase	mitochondrial	5	13	42.8	High
H7C1M2	Protein SON (Fragment) OS=Homo sapiens OX=9606 GN=SON PE=1 SV=1	0.776112	-0.365664	0.02508	down	yes	0.7505	0.967	BP:regulation of primary metabolic process;BP:regulation of metabolic process;BP:organic cyclic compound metabolic process;BP:single-organism metabolic process;BP:negative regulation of biological process;BP:cytokinesis;BP:DNA repair;BP:regulation of macromolecule metabolic process;BP:negative regulation of cell death;BP:heterocycle metabolic process;BP:cellular response to stress;BP:nitrogen com…	GO:0080090;GO:0019222;GO:1901360;GO:0044710;GO:0048519;GO:0000910;GO:0006281;GO:0060255;GO:0060548;GO:0046483;GO:0033554;GO:0006807;GO:0050789;GO:0044260;GO:0016043;GO:0065007;GO:0071840;GO:0051716;GO:0050794;GO:0006950;GO:0008150;GO:0008152;GO:0016070;GO:0016071;GO:0050896;GO:0034641;GO:0044699;GO:0006139;GO:0043484;GO:0009987;GO:0006725;GO:0006974;GO:0007010;GO:0051252;GO:0043170;GO:0000226;GO:…	------	------	------	------	------	------	PF01585.20;PF14709.4;PF00035.23;PF17069.2	G-patch;DND1_DSRM;dsrm;RSRP	G-patch domain;double strand RNA binding domain from DEAD END PROTEIN 1;Double-stranded RNA binding motif;Arginine/Serine-Rich protein 1	cytoplasmic	1	17	159.9	High
Q6UN15	Pre-mRNA 3'-end-processing factor FIP1 OS=Homo sapiens OX=9606 GN=FIP1L1 PE=1 SV=1	0.779793	-0.358837	0.03456	down	yes	0.7525	0.965	BP:nuclear transport;BP:nuclear export;BP:organic cyclic compound biosynthetic process;BP:organic cyclic compound metabolic process;BP:organic substance transport;BP:heterocycle metabolic process;BP:mRNA splicing, via spliceosome;BP:aromatic compound biosynthetic process;BP:mRNA polyadenylation;BP:mRNA cleavage;BP:nitrogen compound metabolic process;BP:mRNA transport;BP:organic substance biosynth…	GO:0051169;GO:0051168;GO:1901362;GO:1901360;GO:0071702;GO:0046483;GO:0000398;GO:0019438;GO:0006378;GO:0006379;GO:0006807;GO:0051028;GO:1901576;GO:0044260;GO:0006369;GO:0018130;GO:0006810;GO:0008150;GO:0008152;GO:0034654;GO:0051236;GO:0051234;GO:0016070;GO:0016071;GO:0050658;GO:0044271;GO:0046907;GO:0050657;GO:0009059;GO:0006353;GO:0015931;GO:0032774;GO:0044249;GO:0034641;GO:0006139;GO:0008380;GO:…	K14405	FIP1L1, FIP1	hsa03015	mRNA surveillance pathway	COG5213	A:RNA processing and modification	PF05182.10	Fip1	Fip1 motif	nuclear	1	24	66.5	High
P02787	Serotransferrin OS=Homo sapiens OX=9606 GN=TF PE=1 SV=3	0.640057	-0.643727	0.02579	down	yes	0.6695	1.046	BP:protein localization;BP:regulation of lymphocyte mediated immunity;BP:regulation of primary metabolic process;BP:regulation of metabolic process;BP:anatomical structure homeostasis;BP:regulation of transport;BP:positive regulation of response to stimulus;BP:regulation of response to stimulus;BP:positive regulation of homeostatic process;BP:regulation of homeostatic process;BP:membrane organiza…	GO:0008104;GO:0002706;GO:0080090;GO:0019222;GO:0060249;GO:0051049;GO:0048584;GO:0048583;GO:0032846;GO:0032844;GO:0061024;GO:0002705;GO:0055072;GO:0006826;GO:0002700;GO:0098771;GO:0048260;GO:0002573;GO:0071840;GO:0002708;GO:0051716;GO:0046852;GO:0070663;GO:0045830;GO:0048869;GO:0055076;GO:0048518;GO:0050801;GO:0019725;GO:0034112;GO:0051054;GO:0051052;GO:0051050;GO:0060255;GO:0002822;GO:0034110;GO:…	K14736	TF	hsa04066;hsa04978;hsa04216	HIF-1 signaling pathway;Mineral absorption;Ferroptosis	------	------	PF00405.14;PF12974.4	Transferrin;Phosphonate-bd	Transferrin;ABC transporter, phosphonate, periplasmic substrate-binding protein	extracellular	1	2	77	High
A0A2R8Y5A3	Catenin beta-1 OS=Homo sapiens OX=9606 GN=CTNNB1 PE=1 SV=1	0.758073	-0.399592	0.01331	down	yes	0.7395	0.9755	BP:nuclear transport;BP:cell-cell junction organization;BP:regulation of transport;BP:T cell activation;BP:establishment of organelle localization;BP:establishment of vesicle localization;BP:cellular response to stimulus;BP:regulation of animal organ formation;BP:morphogenesis of an endothelium;BP:anatomical structure homeostasis;BP:regulation of cytoskeleton organization;BP:regulation of epithel…	GO:0051169;GO:0045216;GO:0051049;GO:0042110;GO:0051656;GO:0051650;GO:0051716;GO:0003156;GO:0003159;GO:0060249;GO:0051493;GO:0030856;GO:0030857;GO:0030855;GO:0033233;GO:0048806;GO:0030858;GO:0033234;GO:2000648;GO:0061548;GO:0061549;GO:0060548;GO:0051291;GO:0032846;GO:0001759;GO:2000142;GO:0065009;GO:0097480;GO:0042325;GO:0042327;GO:0065008;GO:0009605;GO:0019538;GO:0010638;GO:0048732;GO:0006275;GO:…	K02105	CTNNB1	hsa04550;hsa05130;hsa05213;hsa05210;hsa05216;hsa05217;hsa05215;hsa05418;hsa04670;hsa04510;hsa05412;hsa05166;hsa04310;hsa05100;hsa05205;hsa05200;hsa04015;hsa04520;hsa04390;hsa04919;hsa05224;hsa04916	Signaling pathways regulating pluripotency of stem cells;Pathogenic Escherichia coli infection;Endometrial cancer;Colorectal cancer;Thyroid cancer;Basal cell carcinoma;Prostate cancer;Fluid shear stress and atherosclerosis;Leukocyte transendothelial migration;Focal adhesion;Arrhythmogenic right ventricular cardiomyopath;HTLV-I infection;Wnt signaling pathway;Bacterial invasion of epithelial cells…	COG0035	F:Nucleotide transport and metabolism	PF00514.20;PF12717.4;PF01602.17	Arm;Cnd1;Adaptin_N	Armadillo/beta-catenin-like repeat;non-SMC mitotic condensation complex subunit 1;Adaptin N terminal region	cytoplasmic	6	20	85.6	High
O95758	Polypyrimidine tract-binding protein 3 OS=Homo sapiens OX=9606 GN=PTBP3 PE=1 SV=2	0.748851	-0.417249	0.01125	down	yes	0.7335	0.9795	BP:regulation of primary metabolic process;BP:regulation of metabolic process;BP:cell maturation;BP:organic cyclic compound metabolic process;BP:response to unfolded protein;BP:negative regulation of macromolecule metabolic process;BP:cellular developmental process;BP:negative regulation of biological process;BP:regulation of macromolecule metabolic process;BP:response to organic substance;BP:het…	GO:0080090;GO:0019222;GO:0048469;GO:1901360;GO:0006986;GO:0010605;GO:0048869;GO:0048519;GO:0060255;GO:0010033;GO:0046483;GO:0006457;GO:0006807;GO:0050789;GO:0044260;GO:0065007;GO:0050793;GO:0050794;GO:0006950;GO:0008150;GO:0008152;GO:0016070;GO:0050896;GO:0033119;GO:0030154;GO:0034641;GO:0043249;GO:0009892;GO:0009653;GO:0044699;GO:0006139;GO:0043484;GO:0008380;GO:0032502;GO:0016071;GO:0009987;GO:…	K17844	PTBP3, ROD1	------	------	------	------	PF13893.3;PF00076.19	RRM_5;RRM_1	RNA recognition motif.;RNA recognition motif.	cytoplasmic	3	12	59.7	High
P17096	High mobility group protein HMG-I/HMG-Y OS=Homo sapiens OX=9606 GN=HMGA1 PE=1 SV=3	0.7577	-0.400301	0.01254	down	yes	0.738	0.974	BP:regulation of chromosome organization;BP:nuclear transport;BP:regulation of primary metabolic process;BP:regulation of metabolic process;BP:positive regulation of response to stimulus;BP:regulation of response to stimulus;BP:organic cyclic compound biosynthetic process;BP:macromolecular complex assembly;BP:single-organism metabolic process;BP:negative regulation of macromolecule metabolic proc…	GO:0033044;GO:0051169;GO:0080090;GO:0019222;GO:0048584;GO:0048583;GO:1901362;GO:0065003;GO:0044710;GO:0010605;GO:0010604;GO:0043207;GO:0009615;GO:0040029;GO:0044419;GO:0048869;GO:0048518;GO:0048519;GO:0046483;GO:0006268;GO:0034728;GO:0042127;GO:0032392;GO:0006284;GO:0006281;GO:0060255;GO:0006366;GO:0051129;GO:2001141;GO:0031507;GO:0051707;GO:0051704;GO:0044702;GO:0009607;GO:0009605;GO:0010639;GO:…	K09282	HMGA1	------	------	------	------	------	------	------	cytoplasmic	4	31	11.7	High
Q7KZN9	Cytochrome c oxidase assembly protein COX15 homolog OS=Homo sapiens OX=9606 GN=COX15 PE=1 SV=1	0.782405	-0.354013	0.04332	down	yes	0.7515	0.9605	BP:porphyrin-containing compound metabolic process;BP:porphyrin-containing compound biosynthetic process;BP:organic cyclic compound biosynthetic process;BP:single-multicellular organism process;BP:organic cyclic compound metabolic process;BP:macromolecular complex assembly;BP:single-organism metabolic process;BP:single-organism biosynthetic process;BP:pigment metabolic process;BP:heme biosyntheti…	GO:0006778;GO:0006779;GO:1901362;GO:0044707;GO:1901360;GO:0065003;GO:0044710;GO:0044711;GO:0042440;GO:0006783;GO:0006784;GO:0022900;GO:0022904;GO:0030041;GO:0055114;GO:0046483;GO:1901564;GO:1901566;GO:0022607;GO:0006123;GO:0017004;GO:0006807;GO:1901576;GO:0051186;GO:0015992;GO:0051188;GO:0016043;GO:0033014;GO:0033013;GO:0098662;GO:0098660;GO:0018130;GO:0006818;GO:0006812;GO:0006811;GO:0006810;GO:…	K02259	COX15	hsa00860;hsa00190	Porphyrin and chlorophyll metabolism;Oxidative phosphorylation	COG1612	O:Posttranslational modification, protein turnover, chaperones	PF02628.12	COX15-CtaA	Cytochrome oxidase assembly protein	mitochondrial	5	14	46	High
Q96BP2	Coiled-coil-helix-coiled-coil-helix domain-containing protein 1 OS=Homo sapiens OX=9606 GN=CHCHD1 PE=1 SV=1	0.7577	-0.400301	0.01365	down	yes	0.738	0.974	BP:regulation of primary metabolic process;BP:regulation of metabolic process;BP:negative regulation of response to stimulus;BP:positive regulation of response to stimulus;BP:regulation of tumor necrosis factor-mediated signaling pathway;BP:positive regulation of defense response;BP:negative regulation of defense response;BP:signal transduction;BP:cell surface receptor signaling pathway;BP:regula…	GO:0080090;GO:0019222;GO:0048585;GO:0048584;GO:0010803;GO:0031349;GO:0031348;GO:0007165;GO:0007166;GO:0031347;GO:0050728;GO:0044711;GO:0010605;GO:0009966;GO:0070431;GO:0071840;GO:0070647;GO:0050727;GO:0032446;GO:0044092;GO:0048518;GO:0065007;GO:0060255;GO:0048583;GO:0051090;GO:2001141;GO:0043433;GO:1901564;GO:1901566;GO:0019538;GO:0002040;GO:0016055;GO:0070423;GO:0002376;GO:0016567;GO:0010629;GO:…	------	------	------	------	------	------	PF06747.10	CHCH	CHCH domain	mitochondrial	1	14	13.5	High
Q96G74	OTU domain-containing protein 5 OS=Homo sapiens OX=9606 GN=OTUD5 PE=1 SV=1	0.720603	-0.472723	0.006522	down	yes	0.717	0.995	BP:organophosphate catabolic process;BP:purine-containing compound catabolic process;BP:nucleotide catabolic process;BP:purine ribonucleoside monophosphate metabolic process;BP:nucleoside catabolic process;BP:small molecule metabolic process;BP:ribonucleoside monophosphate metabolic process;BP:purine nucleoside monophosphate catabolic process;BP:purine ribonucleoside catabolic process;BP:organic …	GO:0046434;GO:0072523;GO:0009166;GO:0009167;GO:0009164;GO:0044281;GO:0009161;GO:0009128;GO:0046130;GO:1901360;GO:1901361;GO:0044712;GO:0044710;GO:1901565;GO:0043207;GO:0071704;GO:0070647;GO:0070646;GO:0048519;GO:0070536;GO:0015961;GO:1901564;GO:0046128;GO:0010033;GO:0046483;GO:0009607;GO:0009605;GO:0019538;GO:0043647;GO:0006163;GO:0071108;GO:0006807;GO:0032496;GO:0050789;GO:0044267;GO:1901575;GO:…	K12655	OTUD5, DUBA	hsa04622	RIG-I-like receptor signaling pathway	------	------	PF02338.16	OTU	OTU-like cysteine protease	cytoplasmic	1	3	60.6	Medium
Q9NUG6	p53 and DNA damage-regulated protein 1 OS=Homo sapiens OX=9606 GN=PDRG1 PE=1 SV=2	0.769907	-0.377244	0.04689	down	yes	0.7445	0.967	BP:cardiac muscle tissue growth;BP:protein folding;BP:developmental growth;BP:regulation of homotypic cell-cell adhesion;BP:regulation of cell adhesion;BP:negative regulation of binding;BP:regulation of cell-cell adhesion;BP:negative regulation of cell adhesion;BP:heart trabecula morphogenesis;BP:anatomical structure morphogenesis;BP:regulation of biological process;BP:negative regulation of cell…	GO:0055017;GO:0006457;GO:0048589;GO:0034110;GO:0030155;GO:0051100;GO:0022407;GO:0007162;GO:0061384;GO:0009653;GO:0050789;GO:0022408;GO:0061383;GO:0032091;GO:0003206;GO:0040007;GO:0051240;GO:0055010;GO:0003209;GO:0009611;GO:0003222;GO:0065007;GO:0044699;GO:0048729;GO:0044092;GO:0048518;GO:0048519;GO:0065009;GO:0032502;GO:0032501;GO:0055008;GO:0034111;GO:0009987;GO:0042060;GO:0050794;GO:0044767;GO:…	------	------	------	------	------	------	PF01920.17	Prefoldin_2	Prefoldin subunit	cytoplasmic	1	10	15.5	Medium
A0A0A0MT44	Filamin-B OS=Homo sapiens OX=9606 GN=FLNB PE=1 SV=1	0.700298	-0.513959	0.01712	down	yes	0.7045	1.006	BP:cell development;BP:signal transduction;BP:maintenance of location in cell;BP:cellular component organization or biogenesis;BP:single-organism metabolic process;BP:cellular developmental process;BP:skeletal muscle tissue development;BP:epithelial cell development;BP:maintenance of protein location;BP:regulation of biological process;BP:cell morphogenesis involved in differentiation;BP:cell mor…	GO:0048468;GO:0007165;GO:0051651;GO:0071840;GO:0044710;GO:0048869;GO:0007519;GO:0002064;GO:0045185;GO:0050789;GO:0000904;GO:0000902;GO:0016043;GO:0065007;GO:0065008;GO:0006629;GO:0009888;GO:0050794;GO:0008150;GO:0008152;GO:0051235;GO:0003334;GO:0030154;GO:0003382;GO:0009653;GO:0044699;GO:0032502;GO:0032507;GO:0009987;GO:0030036;GO:0014706;GO:0032989;GO:0071704;GO:0030029;GO:0044767;GO:0044763;GO:…	K04437	FLNA	hsa05205;hsa05132;hsa04510;hsa04010	Proteoglycans in cancer;Salmonella infection;Focal adhesion;MAPK signaling pathway	------	------	PF00630.16	Filamin	Filamin/ABP280 repeat	cytoplasmic	1	59	20.7	High
P61964	WD repeat-containing protein 5 OS=Homo sapiens OX=9606 GN=WDR5 PE=1 SV=1	0.784559	-0.350046	0.03818	down	yes	0.752	0.9585	BP:protein methylation;BP:regulation of primary metabolic process;BP:regulation of metabolic process;BP:protein acylation;BP:protein acetylation;BP:internal protein amino acid acetylation;BP:skeletal system development;BP:positive regulation of transcription, DNA-templated;BP:histone H3-K4 methylation;BP:organic substance biosynthetic process;BP:cellular component morphogenesis;BP:organic cyclic …	GO:0006479;GO:0080090;GO:0019222;GO:0043543;GO:0006473;GO:0006475;GO:0001501;GO:0045893;GO:0051568;GO:1901576;GO:0032989;GO:1901362;GO:0071840;GO:0044710;GO:0010604;GO:0048869;GO:0018193;GO:0032446;GO:0048518;GO:0065007;GO:0043966;GO:0043967;GO:0060255;GO:2001141;GO:0032990;GO:1903706;GO:0046483;GO:0044707;GO:0019538;GO:0018205;GO:0019438;GO:0051252;GO:0045652;GO:0016569;GO:0009893;GO:0018022;GO:…	K14963	WDR5, SWD3, CPS30	------	------	------	------	PF00400.29;PF12894.4;PF08662.8;PF11715.5;PF17005.2	WD40;ANAPC4_WD40;eIF2A;Nup160;WD40_like	WD domain, G-beta repeat;Anaphase-promoting complex subunit 4 WD40 domain;Eukaryotic translation initiation factor eIF2A;Nucleoporin Nup120/160;WD40-like domain	cytoplasmic	5	26	36.6	High
Q86UU1	Pleckstrin homology-like domain family B member 1 OS=Homo sapiens OX=9606 GN=PHLDB1 PE=1 SV=1	0.769788	-0.377467	0.02615	down	yes	0.744	0.9665	BP:regulation of stem cell differentiation;BP:regulation of primary metabolic process;BP:regulation of metabolic process;BP:positive regulation of stem cell differentiation;BP:regulation of response to stimulus;BP:signal transduction;BP:cell surface receptor signaling pathway;BP:organic cyclic compound biosynthetic process;BP:single-multicellular organism process;BP:cellular component organizatio…	GO:2000736;GO:0080090;GO:0019222;GO:2000738;GO:0048583;GO:0007165;GO:0007166;GO:1901362;GO:0044707;GO:0071840;GO:0032774;GO:0065003;GO:0010604;GO:0009968;GO:0009966;GO:0048869;GO:0010720;GO:0048518;GO:0048519;GO:0048585;GO:0060255;GO:0045995;GO:2001141;GO:0030512;GO:0046483;GO:0019827;GO:0023057;GO:0016055;GO:0035019;GO:0019438;GO:0098727;GO:0070507;GO:0022604;GO:0051130;GO:0022607;GO:0009893;GO:…	------	------	------	------	------	------	PF00169.26	PH	PH domain	nuclear	2	2	151.1	High
Q9NQ34	Transmembrane protein 9B OS=Homo sapiens OX=9606 GN=TMEM9B PE=1 SV=1	0.750256	-0.414545	0.02612	down	yes	0.733	0.977	BP:regulation of primary metabolic process;BP:regulation of metabolic process;BP:positive regulation of response to stimulus;BP:regulation of response to stimulus;BP:regulation of signal transduction;BP:organic cyclic compound biosynthetic process;BP:organic cyclic compound metabolic process;BP:positive regulation of signal transduction;BP:positive regulation of biological process;BP:positive reg…	GO:0080090;GO:0019222;GO:0048584;GO:0048583;GO:0009966;GO:1901362;GO:1901360;GO:0009967;GO:0048518;GO:0043123;GO:0060255;GO:2001141;GO:0046483;GO:0034641;GO:0006807;GO:0050789;GO:0097659;GO:1901576;GO:0044260;GO:0065007;GO:0018130;GO:0006139;GO:0009889;GO:0050794;GO:0008150;GO:0008152;GO:0019438;GO:0034654;GO:1902533;GO:1902531;GO:0016070;GO:0044271;GO:0006355;GO:0010556;GO:0006351;GO:0032774;GO:…	------	------	------	------	------	------	PF05434.8	Tmemb_9	TMEM9	ER	2	25	22.5	High
P12429	Annexin A3 OS=Homo sapiens OX=9606 GN=ANXA3 PE=1 SV=3	0.747444	-0.419963	0.008863	down	yes	0.731	0.978	BP:phagocytosis;BP:regulation of primary metabolic process;BP:regulation of metabolic process;BP:regulation of RNA biosynthetic process;BP:secretion by cell;BP:organic cyclic compound biosynthetic process;BP:organic cyclic compound metabolic process;BP:single-organism metabolic process;BP:single-organism biosynthetic process;BP:pigment metabolic process;BP:response to external biotic stimulus;BP:…	GO:0006909;GO:0080090;GO:0019222;GO:2001141;GO:0032940;GO:1901362;GO:1901360;GO:0044710;GO:0044711;GO:0042440;GO:0043207;GO:0071704;GO:0044550;GO:0009617;GO:0070848;GO:0043324;GO:0048513;GO:0044093;GO:0044092;GO:0048518;GO:1903506;GO:0015842;GO:0051054;GO:0051052;GO:0031100;GO:0060255;GO:0031960;GO:0007600;GO:0002275;GO:0006836;GO:0007605;GO:0009607;GO:0051707;GO:0010033;GO:0051704;GO:0010634;GO:…	K17089	ANXA3	------	------	------	------	PF00191.17	Annexin	Annexin	cytoplasmic	17	65	36.4	High
A0A0G2JPR0	Complement C4-A OS=Homo sapiens OX=9606 GN=C4A PE=1 SV=1	0.754368	-0.40666	0.01313	down	yes	0.734	0.973	BP:detection of biotic stimulus;BP:detection of chemical stimulus;BP:regulation of primary metabolic process;BP:regulation of metabolic process;BP:regulation of transport;BP:positive regulation of response to stimulus;BP:regulation of response to stimulus;BP:regulation of defense response;BP:single-organism metabolic process;BP:negative regulation of macromolecule metabolic process;BP:response to…	GO:0009595;GO:0009593;GO:0080090;GO:0019222;GO:0051049;GO:0048584;GO:0048583;GO:0031347;GO:0044710;GO:0010605;GO:0043207;GO:0050727;GO:0044092;GO:0048518;GO:0065007;GO:2000425;GO:0098581;GO:0060255;GO:2000257;GO:0032268;GO:0030162;GO:2000427;GO:0002673;GO:0009607;GO:0010033;GO:0009605;GO:0019538;GO:0002376;GO:0045087;GO:0009892;GO:0002920;GO:0050789;GO:0051346;GO:0002684;GO:0002682;GO:0044699;GO:…	K03989	C4	hsa05133;hsa05322;hsa04610;hsa05150	Pertussis;Systemic lupus erythematosus;Complement and coagulation cascades;Staphylococcus aureus infection	------	------	PF07678.11;PF07677.11;PF00207.19;PF01759.18;PF07703.11;PF01835.16;PF10569.6;PF01821.15	A2M_comp;A2M_recep;A2M;NTR;A2M_N_2;A2M_N;Thiol-ester_cl;ANATO	A-macroglobulin complement component;A-macroglobulin receptor;Alpha-2-macroglobulin family;UNC-6/NTR/C345C module;Alpha-2-macroglobulin family N-terminal region;MG2 domain;Alpha-macro-globulin thiol-ester bond-forming region;Anaphylotoxin-like domain	Golgi apparatus	4	3	192.8	High
P05114	Non-histone chromosomal protein HMG-14 OS=Homo sapiens OX=9606 GN=HMGN1 PE=1 SV=3	0.749359	-0.41627	0.01185	down	yes	0.731	0.9755	BP:response to abiotic stimulus;BP:regulation of phosphate metabolic process;BP:cytokine-mediated signaling pathway;BP:regulation of secretion;BP:positive regulation of secretion;BP:regulation of transport;BP:positive regulation of response to stimulus;BP:regulation of response to stimulus;BP:positive regulation of production of molecular mediator of immune response;BP:cell surface receptor signa…	GO:0009628;GO:0019220;GO:0019221;GO:0051046;GO:0051047;GO:0051049;GO:0048584;GO:0048583;GO:0002702;GO:0007166;GO:0002700;GO:1901360;GO:0080090;GO:0044710;GO:0019222;GO:0009966;GO:0009967;GO:0000165;GO:0030852;GO:0044093;GO:0009314;GO:0048518;GO:0002682;GO:0040034;GO:0042127;GO:1902680;GO:0006283;GO:0006281;GO:0060255;GO:0032784;GO:0032786;GO:0006289;GO:1903708;GO:0032268;GO:0048050;GO:2001141;GO:…	K11299	HMGN1	hsa05168	Herpes simplex infection	------	------	PF01101.15	HMG14_17	HMG14 and HMG17	cytoplasmic	4	28	10.7	High
P00156	Cytochrome b OS=Homo sapiens OX=9606 GN=MT-CYB PE=1 SV=2	0.706	-0.50226	0.000185	down	yes	0.706	1	BP:photosynthesis;BP:single-organism metabolic process;BP:hyperosmotic salinity response;BP:electron transport chain;BP:respiratory electron transport chain;BP:inorganic cation transmembrane transport;BP:animal organ regeneration;BP:inorganic ion transmembrane transport;BP:response to calcium ion;BP:response to metal ion;BP:response to peptide hormone;BP:response to inorganic substance;BP:respons…	GO:0015979;GO:0044710;GO:0042538;GO:0022900;GO:0022904;GO:0098662;GO:0031100;GO:0098660;GO:0051592;GO:0010038;GO:0043434;GO:0010035;GO:0010033;GO:0055114;GO:0009605;GO:0010243;GO:0031667;GO:0042493;GO:0006122;GO:0045471;GO:0015992;GO:0015990;GO:0014070;GO:0006818;GO:0006812;GO:0006811;GO:0006810;GO:0006950;GO:0008150;GO:0008152;GO:0009266;GO:0051234;GO:0036293;GO:0050896;GO:0036296;GO:0015988;GO:…	K00412	CYTB, petB	hsa00190;hsa04260;hsa04932;hsa05016;hsa05010;hsa05012	Oxidative phosphorylation;Cardiac muscle contraction;Non-alcoholic fatty liver diseas;Huntington's disease;Alzheimer's disease;Parkinson's disease	COG1290	C:Energy production and conversion	PF00033.16;PF13631.3;PF00032.14	Cytochrome_B;Cytochrom_B_N_2;Cytochrom_B_C	Cytochrome b/b6/petB;Cytochrome;Cytochrome	cytoplasmic	1	2	42.7	High
Q13485	Mothers against decapentaplegic homolog 4 OS=Homo sapiens OX=9606 GN=SMAD4 PE=1 SV=1	0.752826	-0.409611	0.01998	down	yes	0.7325	0.973	BP:regulation of intracellular protein transport;BP:regulation of muscle hypertrophy;BP:regulation of secretion;BP:positive regulation of secretion;BP:regulation of transport;BP:inorganic ion homeostasis;BP:regulation of phosphate metabolic process;BP:neural crest cell differentiation;BP:cellular response to stimulus;BP:regulation of metabolic process;BP:epithelial cell differentiation;BP:positiv…	GO:0033157;GO:0014743;GO:0051046;GO:0051047;GO:0051049;GO:0098771;GO:0019220;GO:0014033;GO:0051716;GO:0019222;GO:0030855;GO:2000738;GO:0060548;GO:0007283;GO:0044060;GO:0097485;GO:0065009;GO:0046483;GO:0042325;GO:0042327;GO:0042326;GO:0019538;GO:0009566;GO:0051253;GO:0009894;GO:0051252;GO:0009892;GO:0009893;GO:0009890;GO:0009891;GO:0051254;GO:0060065;GO:0035556;GO:0051223;GO:0050789;GO:0000904;GO:…	K04501	SMAD4	hsa04350;hsa04659;hsa04550;hsa04371;hsa05212;hsa04110;hsa05200;hsa05210;hsa04520;hsa04390;hsa04068;hsa05220;hsa05166;hsa04310;hsa05161;hsa04933	TGF-beta signaling pathway;Th17 cell differentiation;Signaling pathways regulating pluripotency of stem cells;Apelin signaling pathway;Pancreatic cancer;Cell cycle;Pathways in cancer;Colorectal cancer;Adherens junction;Hippo signaling pathway;FoxO signaling pathway;Chronic myeloid leukemia;HTLV-I infection;Wnt signaling pathway;Hepatitis B;AGE-RAGE signaling pathway in diabetic complications	------	------	PF03166.11;PF03165.13	MH2;MH1	MH2 domain;MH1 domain	cytoplasmic	2	5	60.4	High
Q7KZI7	Serine/threonine-protein kinase MARK2 OS=Homo sapiens OX=9606 GN=MARK2 PE=1 SV=2	0.772869	-0.371704	0.04118	down	yes	0.7435	0.962	BP:regulation of phosphate metabolic process;BP:regulation of primary metabolic process;BP:regulation of metabolic process;BP:activation of protein kinase activity;BP:establishment or maintenance of cell polarity;BP:signal transduction;BP:cell surface receptor signaling pathway;BP:regulation of macromolecule biosynthetic process;BP:organic cyclic compound biosynthetic process;BP:organic cyclic co…	GO:0019220;GO:0080090;GO:0019222;GO:0032147;GO:0007163;GO:0007165;GO:0007166;GO:0010556;GO:1901362;GO:1901360;GO:1901361;GO:0044712;GO:0044710;GO:0010605;GO:0010604;GO:0048869;GO:0071840;GO:0051493;GO:0018193;GO:0044419;GO:0045664;GO:0045666;GO:0044093;GO:0048518;GO:0048519;GO:0060255;GO:0019439;GO:0045859;GO:0010976;GO:0010975;GO:2001141;GO:0051179;GO:1903008;GO:0046483;GO:0042325;GO:0042327;GO:…	K08798	MARK	------	------	------	------	PF00069.22;PF07714.14;PF02149.16;PF14531.3	Pkinase;Pkinase_Tyr;KA1;Kinase-like	Protein kinase domain;Protein tyrosine kinase;Kinase associated domain 1;Kinase-like	cytoplasmic	1	2	87.9	High
Q86VS8	Protein Hook homolog 3 OS=Homo sapiens OX=9606 GN=HOOK3 PE=1 SV=2	0.737621	-0.439048	0.01032	down	yes	0.7225	0.9795	BP:protein localization;BP:single-multicellular organism process;BP:cellular component organization or biogenesis;BP:protein localization to centrosome;BP:negative regulation of cell development;BP:negative regulation of biological process;BP:macromolecule localization;BP:establishment of protein localization;BP:interkinetic nuclear migration;BP:early endosome to late endosome transport;BP:vesicl…	GO:0008104;GO:0044707;GO:0071840;GO:0071539;GO:0010721;GO:0048519;GO:0033036;GO:0045184;GO:0022027;GO:0045022;GO:0016192;GO:0019827;GO:0050789;GO:0007032;GO:0016043;GO:0098927;GO:0065007;GO:0050793;GO:0006810;GO:0050794;GO:0098727;GO:0008150;GO:0051239;GO:0051234;GO:0097150;GO:0046907;GO:0070727;GO:0051961;GO:0051960;GO:0051241;GO:0008333;GO:0060284;GO:0007041;GO:0007040;GO:0044699;GO:0050767;GO:…	K16536	HOOK3	------	------	------	------	PF05622.9	HOOK	HOOK protein	cytoplasmic	2	6	83.1	High
P27701	CD82 antigen OS=Homo sapiens OX=9606 GN=CD82 PE=1 SV=1	0.763911	-0.388524	0.02954	down	yes	0.7345	0.9615	BP:circadian regulation of gene expression;BP:regulation of primary metabolic process;BP:regulation of metabolic process;BP:signal transduction;BP:cell surface receptor signaling pathway;BP:organic cyclic compound biosynthetic process;BP:organic cyclic compound metabolic process;BP:RNA biosynthetic process;BP:single-organism metabolic process;BP:negative regulation of macromolecule metabolic proc…	GO:0032922;GO:0080090;GO:0019222;GO:0007165;GO:0007166;GO:1901362;GO:1901360;GO:0032774;GO:0044710;GO:0010605;GO:0048511;GO:0048518;GO:0048519;GO:0006664;GO:0006665;GO:0060255;GO:0032787;GO:0010628;GO:0042752;GO:0051591;GO:2001141;GO:0043436;GO:1901564;GO:0010033;GO:0046483;GO:0044702;GO:0044707;GO:0010243;GO:0046683;GO:0019438;GO:0044281;GO:0009892;GO:0009893;GO:0009890;GO:0009891;GO:0051254;GO:…	K06509	KAI1, CD82, TSPAN27	hsa04115	p53 signaling pathway	------	------	PF00335.17	Tetraspannin	Tetraspanin family	lysosomal	4	15	29.6	High
Q5SW96	Low density lipoprotein receptor adapter protein 1 OS=Homo sapiens OX=9606 GN=LDLRAP1 PE=1 SV=3	0.703666	-0.507036	0.04877	down	yes	0.7005	0.9955	BP:regulation of primary metabolic process;BP:regulation of metabolic process;BP:positive regulation of receptor-mediated endocytosis involved in cholesterol transport;BP:regulation of transport;BP:positive regulation of response to stimulus;BP:regulation of response to stimulus;BP:membrane organization;BP:small molecule metabolic process;BP:positive regulation of receptor-mediated endocytosis;BP…	GO:0080090;GO:0019222;GO:1905602;GO:0051049;GO:0048584;GO:0048583;GO:0061024;GO:0044281;GO:0048260;GO:0090003;GO:0071840;GO:0044710;GO:0009967;GO:0045834;GO:0048518;GO:0051050;GO:1902652;GO:0030301;GO:0016192;GO:0023056;GO:0044707;GO:0019538;GO:0048878;GO:0009893;GO:0015918;GO:0015850;GO:0090181;GO:0042982;GO:0044260;GO:0016043;GO:0065007;GO:1901360;GO:0065009;GO:0065008;GO:0051130;GO:0070201;GO:…	K12474	LDLRAP1, ARH	hsa04144	Endocytosis	------	------	PF00640.20;PF14719.3;PF08416.10	PID;PID_2;PTB	Phosphotyrosine interaction domain;Phosphotyrosine interaction domain;Phosphotyrosine-binding domain	mitochondrial	1	4	33.9	High
A0A0C4DFX9	Negative elongation factor A OS=Homo sapiens OX=9606 GN=NELFA PE=1 SV=1	0.698898	-0.516847	0.001505	down	yes	0.6975	0.998	BP:regulation of primary metabolic process;BP:regulation of metabolic process;BP:regulation of histone H3-K4 methylation;BP:regulation of histone modification;BP:positive regulation of histone modification;BP:cellular response to stimulus;BP:negative regulation of macromolecule metabolic process;BP:positive regulation of macromolecule metabolic process;BP:positive regulation of biological process…	GO:0080090;GO:0019222;GO:0051569;GO:0031056;GO:0031058;GO:0051716;GO:0010605;GO:0010604;GO:0048518;GO:0048519;GO:0060255;GO:0032784;GO:0032785;GO:0031060;GO:0031062;GO:2001141;GO:0044707;GO:0010638;GO:0010629;GO:0009892;GO:0009893;GO:0009890;GO:0009891;GO:0010628;GO:0050789;GO:1901576;GO:0044260;GO:0065007;GO:0051130;GO:0033554;GO:0050792;GO:0009889;GO:0050794;GO:0043902;GO:0043903;GO:0006950;GO:…	K15179	WHSC2, NELFA	------	------	------	------	------	------	------	cytoplasmic	7	23	58.5	High
Q15022	Polycomb protein SUZ12 OS=Homo sapiens OX=9606 GN=SUZ12 PE=1 SV=3	0.721545	-0.470839	0.0219	down	yes	0.71	0.984	BP:protein methylation;BP:regulation of primary metabolic process;BP:regulation of metabolic process;BP:nucleobase-containing compound metabolic process;BP:organic cyclic compound biosynthetic process;BP:cellular component organization or biogenesis;BP:RNA biosynthetic process;BP:single-organism metabolic process;BP:negative regulation of cell cycle;BP:protein modification by small protein conjug…	GO:0006479;GO:0080090;GO:0019222;GO:0006139;GO:1901362;GO:0071840;GO:0032774;GO:0044710;GO:0045786;GO:0070647;GO:0040029;GO:0018193;GO:0032446;GO:0048518;GO:0048519;GO:0042127;GO:0016571;GO:0060255;GO:0070734;GO:2001141;GO:0007076;GO:0010032;GO:0046483;GO:0044702;GO:0044249;GO:0019538;GO:0016567;GO:0019438;GO:0016569;GO:0071103;GO:0009892;GO:0009890;GO:0018022;GO:0010629;GO:0050789;GO:0044267;GO:…	K11463	SUZ12	------	------	------	------	PF09733.6	VEFS-Box	VEFS-Box of polycomb protein	nuclear	2	4	83	High
P04921	Glycophorin-C OS=Homo sapiens OX=9606 GN=GYPC PE=1 SV=1	0.71046	-0.493175	0.005692	down	yes	0.703	0.9895	BP:cellular cation homeostasis;BP:anion transport;BP:inorganic ion homeostasis;BP:cellular homeostasis;BP:organic anion transport;BP:spermatogenesis;BP:cell-cell adhesion via plasma-membrane adhesion molecules;BP:single organism reproductive process;BP:cell motility;BP:chemical homeostasis;BP:immune system process;BP:bicarbonate transport;BP:digestive tract development;BP:movement of cell or subc…	GO:0030003;GO:0006820;GO:0098771;GO:0019725;GO:0015711;GO:0007283;GO:0098742;GO:0044702;GO:0048870;GO:0048878;GO:0002376;GO:0015701;GO:0048565;GO:0006928;GO:0006885;GO:0065007;GO:0044699;GO:0065008;GO:0006810;GO:0098609;GO:0006811;GO:0008150;GO:0051234;GO:0050801;GO:0051453;GO:0007157;GO:0022610;GO:0008037;GO:0048609;GO:0009987;GO:0006873;GO:0030004;GO:0048232;GO:0055080;GO:0055082;GO:0032502;GO:…	K06576	GYPC, CD236	hsa05144	Malaria	------	------	------	------	------	cytoplasmic	1	20	13.8	High
Q9Y5U2	Protein TSSC4 OS=Homo sapiens OX=9606 GN=TSSC4 PE=1 SV=3	0.76027	-0.395415	0.03119	down	yes	0.731	0.9615	BP:positive regulation of translational elongation;BP:regulation of metabolic process;BP:protein homotetramerization;BP:protein homooligomerization;BP:organic cyclic compound biosynthetic process;BP:cellular component organization or biogenesis;BP:regulation of primary metabolic process;BP:single-organism metabolic process;BP:positive regulation of macromolecule metabolic process;BP:posttranscrip…	GO:0045901;GO:0019222;GO:0051289;GO:0051260;GO:1901362;GO:0071840;GO:0080090;GO:0044710;GO:0010604;GO:0010608;GO:0048518;GO:0070537;GO:0016570;GO:0006448;GO:0060255;GO:2001141;GO:0046483;GO:0019538;GO:0033554;GO:0019438;GO:0016569;GO:0009893;GO:0009891;GO:0010628;GO:0097659;GO:0044267;GO:1901575;GO:0044265;GO:0006357;GO:0016043;GO:0065003;GO:0065007;GO:0007049;GO:0045727;GO:0016579;GO:0016578;GO:…	------	------	------	------	------	------	PF15264.3	TSSC4	Tumour suppressing sub-chromosomal transferable candidate 4	cytoplasmic	1	4	34.3	High
Q9C0B2	Cilia- and flagella-associated protein 74 OS=Homo sapiens OX=9606 GN=CFAP74 PE=2 SV=3	0.778245	-0.361704	0.0498	down	yes	0.7405	0.9515	BP:RNA modification;BP:single-multicellular organism process;BP:organic cyclic compound metabolic process;BP:DNA dealkylation involved in DNA repair;BP:single-organism metabolic process;BP:DNA modification;BP:regulation of cell proliferation;BP:regulation of fat cell proliferation;BP:regulation of respiratory system process;BP:oxidation-reduction process;BP:heterocycle metabolic process;BP:demeth…	GO:0009451;GO:0044707;GO:1901360;GO:0006307;GO:0044710;GO:0006304;GO:0042127;GO:0070344;GO:0044065;GO:0055114;GO:0046483;GO:0070988;GO:0070989;GO:0042245;GO:0022607;GO:0070350;GO:0006807;GO:0035552;GO:0035553;GO:0044260;GO:0035082;GO:0016043;GO:0065007;GO:0071840;GO:0010883;GO:0065008;GO:0048646;GO:0050793;GO:0009888;GO:0050794;GO:0043412;GO:0044728;GO:0008150;GO:0008152;GO:0016070;GO:0001578;GO:…	------	------	------	------	------	------	PF15780.2	ASH	Abnormal spindle-like microcephaly-assoc'd, ASPM-SPD-2-Hydin	cytoplasmic	1	0	178.5	Medium
Q86VI3	Ras GTPase-activating-like protein IQGAP3 OS=Homo sapiens OX=9606 GN=IQGAP3 PE=1 SV=2	0.726391	-0.461182	0.0191	down	yes	0.7115	0.9795	BP:exocytosis;BP:regulation of phosphate metabolic process;BP:regulation of primary metabolic process;BP:regulation of metabolic process;BP:positive regulation of response to stimulus;BP:G1/S transition of mitotic cell cycle;BP:activation of protein kinase activity;BP:protein localization;BP:signal transduction;BP:cellular component organization or biogenesis;BP:cellular response to stimulus;BP:n…	GO:0006887;GO:0019220;GO:0080090;GO:0019222;GO:0048584;GO:0000082;GO:0032147;GO:0008104;GO:0007165;GO:0071840;GO:0051716;GO:0010605;GO:0010604;GO:0070727;GO:0009966;GO:0009967;GO:0000165;GO:0046879;GO:0044093;GO:0048518;GO:0048519;GO:0033036;GO:0042127;GO:0060255;GO:0048583;GO:0045859;GO:0042221;GO:0010033;GO:0016192;GO:0042325;GO:0042327;GO:0019538;GO:0015833;GO:0032535;GO:0009892;GO:0009893;GO:…	K05767	IQGAP2_3	hsa04810	Regulation of actin cytoskeleton	COG5261	Z:Cytoskeleton	PF00616.16;PF03836.12;PF00307.28;PF00612.24	RasGAP;RasGAP_C;CH;IQ	GTPase-activator protein for Ras-like GTPase;RasGAP C-terminus;Calponin homology;IQ calmodulin-binding motif	cytoplasmic	1	3	184.6	High
P19388	DNA-directed RNA polymerases I, II, and III subunit RPABC1 OS=Homo sapiens OX=9606 GN=POLR2E PE=1 SV=4	0.750518	-0.414042	0.02514	down	yes	0.725	0.966	BP:regulation of primary metabolic process;BP:regulation of metabolic process;BP:7-methylguanosine RNA capping;BP:nucleobase-containing compound metabolic process;BP:RNA splicing, via transesterification reactions with bulged adenosine as nucleophile;BP:signal transduction;BP:cell surface receptor signaling pathway;BP:enzyme linked receptor protein signaling pathway;BP:transmembrane receptor prot…	GO:0080090;GO:0019222;GO:0009452;GO:0006139;GO:0000377;GO:0007165;GO:0007166;GO:0007167;GO:0007169;GO:1901362;GO:1901360;GO:0006361;GO:0044710;GO:0010605;GO:0010604;GO:0098781;GO:0010608;GO:0040029;GO:0044419;GO:0048518;GO:0048519;GO:0051704;GO:0006383;GO:0006281;GO:0060255;GO:0006289;GO:0060147;GO:0000375;GO:2001141;GO:0044403;GO:0046483;GO:0019827;GO:0032481;GO:0035019;GO:0000398;GO:0006370;GO:…	K03013	RPB5, POLR2E	hsa04623;hsa03020;hsa05169;hsa00230;hsa05016;hsa00240	Cytosolic DNA-sensing pathway;RNA polymerase;Epstein-Barr virus infection;Purine metabolism;Huntington's disease;Pyrimidine metabolism	COG2012	K:Transcription	PF01191.16;PF03871.11	RNA_pol_Rpb5_C;RNA_pol_Rpb5_N	RNA polymerase Rpb5, C-terminal domain;RNA polymerase Rpb5, N-terminal domain	cytoplasmic	5	46	24.5	High
Q96EN8	Molybdenum cofactor sulfurase OS=Homo sapiens OX=9606 GN=MOCOS PE=1 SV=2	0.69	-0.535332	0.00546	down	yes	0.69	1	BP:Mo-molybdopterin cofactor biosynthetic process;BP:coenzyme metabolic process;BP:nucleoside triphosphate metabolic process;BP:purine nucleoside triphosphate metabolic process;BP:cellular biosynthetic process;BP:cellular nitrogen compound metabolic process;BP:nitrogen compound metabolic process;BP:coenzyme biosynthetic process;BP:small molecule metabolic process;BP:purine-containing compound met…	GO:0006777;GO:0006732;GO:0009141;GO:0009144;GO:0044249;GO:0034641;GO:0006807;GO:0009108;GO:0044281;GO:0072521;GO:1901362;GO:0009259;GO:1901360;GO:0006139;GO:0044710;GO:0051186;GO:0043545;GO:0042278;GO:0051189;GO:0051188;GO:0071704;GO:0009199;GO:0044699;GO:0018130;GO:0009205;GO:0046039;GO:0019720;GO:0019693;GO:1901576;GO:0009987;GO:0006725;GO:0009150;GO:0009058;GO:0044711;GO:0008150;GO:0009116;GO:…	K15631	ABA3	hsa00790	Folate biosynthesis	COG3217;COG0520	R:General function prediction only;E:Amino acid transport and metabolism	PF03476.13;PF00266.16;PF03473.14	MOSC_N;Aminotran_5;MOSC	MOSC N-terminal beta barrel domain;Aminotransferase class-V;MOSC domain	cytoplasmic	3	5	98.1	High
Q8WVJ2	NudC domain-containing protein 2 OS=Homo sapiens OX=9606 GN=NUDCD2 PE=1 SV=1	0.756237	-0.40309	0.02537	down	yes	0.7275	0.962	BP:negative regulation of transferase activity;BP:regulation of phosphate metabolic process;BP:regulation of primary metabolic process;BP:regulation of metabolic process;BP:regulation of cell cycle process;BP:signal transduction;BP:negative regulation of macromolecule metabolic process;BP:negative regulation of molecular function;BP:positive regulation of biological process;BP:negative regulation…	GO:0051348;GO:0019220;GO:0080090;GO:0019222;GO:0010564;GO:0007165;GO:0010605;GO:0044092;GO:0048518;GO:0048519;GO:0060255;GO:0045859;GO:0042325;GO:0042326;GO:0050789;GO:0033673;GO:0009892;GO:0035556;GO:0090068;GO:0007346;GO:0043549;GO:0065007;GO:0007049;GO:0065009;GO:0050790;GO:0050794;GO:1901987;GO:0008150;GO:1901989;GO:0031400;GO:0051338;GO:0030307;GO:0051128;GO:1901990;GO:1901992;GO:0006457;GO:…	------	------	------	------	------	------	PF04969.13	CS	CS domain	cytoplasmic	6	58	17.7	High
P49761	Dual specificity protein kinase CLK3 OS=Homo sapiens OX=9606 GN=CLK3 PE=1 SV=3	0.701462	-0.511562	0.01059	down	yes	0.6955	0.9915	BP:regulation of primary metabolic process;BP:regulation of metabolic process;BP:peptidyl-tyrosine modification;BP:peptidyl-amino acid modification;BP:response to radiation;BP:negative regulation of biological process;BP:regulation of macromolecule metabolic process;BP:response to organic substance;BP:protein metabolic process;BP:negative regulation of metabolic process;BP:negative regulation of …	GO:0080090;GO:0019222;GO:0018212;GO:0018193;GO:0009314;GO:0048519;GO:0060255;GO:0010033;GO:0019538;GO:0009892;GO:0009890;GO:0032526;GO:0010906;GO:0044267;GO:0044260;GO:0065007;GO:0006111;GO:0045912;GO:0045721;GO:0009889;GO:0050794;GO:0043412;GO:0036211;GO:0008150;GO:0008152;GO:0043255;GO:0050896;GO:0006109;GO:0016310;GO:0046777;GO:0010212;GO:0043484;GO:0044238;GO:0009987;GO:0010675;GO:0010677;GO:…	K08823	CLK	------	------	------	------	PF00069.22;PF07714.14	Pkinase;Pkinase_Tyr	Protein kinase domain;Protein tyrosine kinase	mitochondrial	1	2	73.5	Medium
O60353	Frizzled-6 OS=Homo sapiens OX=9606 GN=FZD6 PE=1 SV=2	0.733025	-0.448066	0.01487	down	yes	0.7125	0.972	BP:regulation of primary metabolic process;BP:regulation of metabolic process;BP:negative regulation of response to stimulus;BP:regulation of response to stimulus;BP:regulation of Wnt signaling pathway;BP:establishment of tissue polarity;BP:signal transduction;BP:cell surface receptor signaling pathway;BP:establishment of body hair or bristle planar orientation;BP:midbrain morphogenesis;BP:single…	GO:0080090;GO:0019222;GO:0048585;GO:0048583;GO:0030111;GO:0007164;GO:0007165;GO:0007166;GO:0048104;GO:1904693;GO:0044710;GO:0010605;GO:0009968;GO:0009966;GO:0035567;GO:0044092;GO:0048519;GO:0051172;GO:0060255;GO:0051090;GO:0048598;GO:2001141;GO:0043433;GO:0030168;GO:0090175;GO:0044707;GO:0016055;GO:1902679;GO:1901135;GO:0044281;GO:0009892;GO:0048105;GO:0009890;GO:0022603;GO:0008152;GO:0010629;GO:…	K02376	FZD6	hsa04550;hsa05205;hsa05200;hsa05217;hsa05224;hsa04916;hsa04390;hsa05166;hsa04310;hsa04150	Signaling pathways regulating pluripotency of stem cells;Proteoglycans in cancer;Pathways in cancer;Basal cell carcinoma;Breast cancer;Melanogenesis;Hippo signaling pathway;HTLV-I infection;Wnt signaling pathway;mTOR signaling pathway	------	------	PF01534.14;PF01392.19	Frizzled;Fz	Frizzled/Smoothened family membrane region;Fz domain	ER	4	11	79.2	High
Q14004	Cyclin-dependent kinase 13 OS=Homo sapiens OX=9606 GN=CDK13 PE=1 SV=2	0.556377	-0.845865	0.02982	down	yes	0.602	1.082	BP:regulation of stem cell differentiation;BP:negative regulation of stem cell differentiation;BP:regulation of metabolic process;BP:regulation of cellular macromolecule biosynthetic process;BP:regulation of RNA biosynthetic process;BP:RNA splicing, via transesterification reactions with bulged adenosine as nucleophile;BP:regulation of macromolecule biosynthetic process;BP:organic cyclic compound…	GO:2000736;GO:2000737;GO:0019222;GO:2000112;GO:2001141;GO:0000377;GO:0010556;GO:1901362;GO:0080090;GO:0002263;GO:0071840;GO:0001775;GO:0044419;GO:0048513;GO:0048518;GO:0048519;GO:0046483;GO:0016192;GO:0042127;GO:0060255;GO:0071704;GO:0051704;GO:0044707;GO:0002274;GO:0000398;GO:0010468;GO:0051783;GO:0019538;GO:0010628;GO:0051252;GO:0022607;GO:0009893;GO:0009891;GO:0051254;GO:0045321;GO:0006807;GO:…	K08819	CDK12_13	------	------	------	------	PF00069.22;PF07714.14	Pkinase;Pkinase_Tyr	Protein kinase domain;Protein tyrosine kinase	nuclear	1	2	164.8	High
Q9BQP7	Mitochondrial genome maintenance exonuclease 1 OS=Homo sapiens OX=9606 GN=MGME1 PE=1 SV=1	0.763751	-0.388826	0.03845	down	yes	0.729	0.9545	BP:mitochondrial DNA metabolic process;BP:nucleic acid metabolic process;BP:cellular biosynthetic process;BP:cellular nitrogen compound metabolic process;BP:nitrogen compound metabolic process;BP:cellular macromolecule biosynthetic process;BP:mitochondrial DNA repair;BP:cellular component organization or biogenesis;BP:nucleobase-containing compound metabolic process;BP:single-organism metabolic p…	GO:0032042;GO:0090304;GO:0044249;GO:0034641;GO:0006807;GO:0034645;GO:0043504;GO:0071840;GO:0006139;GO:0044710;GO:0000002;GO:0044260;GO:1901360;GO:0016043;GO:0006264;GO:0071704;GO:0006260;GO:0007005;GO:0006261;GO:0009058;GO:0006281;GO:0009987;GO:0006725;GO:0051716;GO:0006974;GO:0006950;GO:0009059;GO:0044763;GO:0008152;GO:0046483;GO:0006996;GO:0044238;GO:0044699;GO:0090305;GO:0050896;GO:0044237;GO:…	K19465	MGME1, DDK1	------	------	------	------	PF12705.4	PDDEXK_1	PD	mitochondrial	3	18	39.4	High
Q5T5C0	Syntaxin-binding protein 5 OS=Homo sapiens OX=9606 GN=STXBP5 PE=1 SV=1	0.608987	-0.715518	0.01311	down	yes	0.637	1.046	BP:protein localization;BP:regulation of secretion;BP:positive regulation of secretion;BP:regulation of transport;BP:regulation of response to stimulus;BP:cellular developmental process;BP:positive regulation of molecular function;BP:epithelial cell differentiation;BP:positive regulation of biological process;BP:macromolecule localization;BP:positive regulation of transport;BP:regulation of macro…	GO:0008104;GO:0051046;GO:0051047;GO:0051049;GO:0048583;GO:0048869;GO:0044093;GO:0030855;GO:0048518;GO:0033036;GO:0051050;GO:0060255;GO:0045184;GO:0016192;GO:0044707;GO:0019538;GO:0030193;GO:0018149;GO:0051223;GO:0050789;GO:0044267;GO:0050708;GO:0043547;GO:0044260;GO:0006887;GO:1900046;GO:0065007;GO:0065009;GO:0065008;GO:0070201;GO:0006810;GO:0050790;GO:0050794;GO:0043412;GO:0036211;GO:0008150;GO:…	K08518	STXBP5, SRO7_77	------	------	------	------	PF08366.10;PF00400.29;PF08596.7	LLGL;WD40;Lgl_C	LLGL2;WD domain, G-beta repeat;Lethal giant larva	cytoplasmic	1	2	127.5	High
Q9HA64	Ketosamine-3-kinase OS=Homo sapiens OX=9606 GN=FN3KRP PE=1 SV=2	0.738366	-0.437592	0.03238	down	yes	0.714	0.967	BP:pyrimidine ribonucleotide metabolic process;BP:nucleotide biosynthetic process;BP:small molecule metabolic process;BP:ribonucleoside monophosphate metabolic process;BP:pyrimidine nucleoside biosynthetic process;BP:organic cyclic compound biosynthetic process;BP:pyrimidine ribonucleoside metabolic process;BP:pyrimidine ribonucleoside biosynthetic process;BP:single-organism metabolic process;BP:…	GO:0009218;GO:0009165;GO:0044281;GO:0009161;GO:0046134;GO:1901362;GO:0046131;GO:0046132;GO:0044710;GO:0044711;GO:0044206;GO:0010138;GO:0009201;GO:0046036;GO:0009209;GO:0009208;GO:0009174;GO:0009173;GO:0042455;GO:0046483;GO:0044211;GO:1901564;GO:1901566;GO:0019538;GO:0019438;GO:0009163;GO:0009148;GO:0009141;GO:0009142;GO:0009147;GO:0006807;GO:1901576;GO:0044260;GO:0006206;GO:1901360;GO:0019637;GO:…	K15523	FN3KRP	------	------	COG3001	G:Carbohydrate transport and metabolism	PF03881.11;PF01636.20	Fructosamin_kin;APH	Fructosamine kinase;Phosphotransferase enzyme family	cytoplasmic	4	18	34.4	High
Q9UBW8	COP9 signalosome complex subunit 7a OS=Homo sapiens OX=9606 GN=COPS7A PE=1 SV=1	0.726337	-0.461288	0.02072	down	yes	0.706	0.972	BP:organic cyclic compound biosynthetic process;BP:cellular component organization or biogenesis;BP:single-organism metabolic process;BP:protein modification by small protein conjugation or removal;BP:protein modification by small protein removal;BP:transcription-coupled nucleotide-excision repair;BP:DNA repair;BP:nucleotide-excision repair;BP:heterocycle metabolic process;BP:single-multicellular…	GO:1901362;GO:0071840;GO:0044710;GO:0070647;GO:0070646;GO:0006283;GO:0006281;GO:0006289;GO:0046483;GO:0044707;GO:0019538;GO:0000715;GO:0033554;GO:0019438;GO:0022604;GO:0022603;GO:0006807;GO:0050789;GO:0097659;GO:1901576;GO:0044260;GO:0016043;GO:0050793;GO:0065007;GO:1901360;GO:0018130;GO:0006139;GO:0000338;GO:0051716;GO:0050794;GO:0043412;GO:0036211;GO:0008150;GO:0008152;GO:0034654;GO:0016070;GO:…	K12180	COPS7, CSN7	------	------	------	------	PF01399.24	PCI	PCI domain	cytoplasmic	4	27	30.3	High
Q00536	Cyclin-dependent kinase 16 OS=Homo sapiens OX=9606 GN=CDK16 PE=1 SV=1	0.71875	-0.476438	0.009269	down	yes	0.7015	0.976	BP:axon extension;BP:regulation of peptide transport;BP:developmental growth;BP:developmental cell growth;BP:regulation of transport;BP:regulation of response to stimulus;BP:behavior;BP:cellular component organization or biogenesis;BP:nitrogen compound transport;BP:cellular developmental process;BP:hormone secretion;BP:neuron projection extension;BP:organic substance transport;BP:organic substanc…	GO:0048675;GO:0090087;GO:0048589;GO:0048588;GO:0051049;GO:0048583;GO:0007610;GO:0071840;GO:0071705;GO:0048869;GO:0046879;GO:1990138;GO:0071702;GO:0071704;GO:0007283;GO:0023061;GO:0072511;GO:0016192;GO:0044702;GO:0044707;GO:0044708;GO:0019538;GO:0070509;GO:0031175;GO:0051223;GO:0044267;GO:0010646;GO:0016049;GO:0044260;GO:0006887;GO:0016043;GO:0065007;GO:0065008;GO:0070201;GO:0006812;GO:0006811;GO:…	K08820	CDK16, PCTK1	------	------	------	------	PF00069.22;PF07714.14;PF14531.3	Pkinase;Pkinase_Tyr;Kinase-like	Protein kinase domain;Protein tyrosine kinase;Kinase-like	cytoplasmic	1	4	55.7	High
J3KTA1	F-box and leucine-rich repeat protein 20, isoform CRA_a OS=Homo sapiens OX=9606 GN=FBXL20 PE=1 SV=1	0.735127	-0.443935	0.02162	down	yes	0.7105	0.9665	BP:defense response;BP:multicellular organismal process;BP:single-multicellular organism process;BP:single-organism behavior;BP:response to stimulus;BP:behavior;BP:response to stress;BP:behavioral defense response;BP:fear response;BP:multicellular organismal response to stress;BP:biological_process;BP:single-organism process;BP:behavioral fear response;CC:cytoplasm;CC:cell part;CC:cellular_compon…	GO:0006952;GO:0032501;GO:0044707;GO:0044708;GO:0050896;GO:0007610;GO:0006950;GO:0002209;GO:0042596;GO:0033555;GO:0008150;GO:0044699;GO:0001662;GO:0005737;GO:0044464;GO:0005575;GO:0044424	K10268	FBXL2_20	------	------	------	------	PF12799.4;PF13516.3;PF12937.4;PF00646.30	LRR_4;LRR_6;F-box-like;F-box	Leucine Rich repeats;Leucine Rich repeat;F-box-like;F-box domain	cytoplasmic	2	5	48.5	High
Q96D53	Atypical kinase COQ8B, mitochondrial OS=Homo sapiens OX=9606 GN=COQ8B PE=1 SV=2	0.753661	-0.408012	0.03322	down	yes	0.7205	0.956	BP:small molecule metabolic process;BP:small molecule biosynthetic process;BP:single-organism metabolic process;BP:single-organism biosynthetic process;BP:organic substance metabolic process;BP:oxidoreduction coenzyme metabolic process;BP:cerebellar Purkinje cell layer morphogenesis;BP:protein metabolic process;BP:cellular protein metabolic process;BP:cofactor metabolic process;BP:cellular macrom…	GO:0044281;GO:0044283;GO:0044710;GO:0044711;GO:0071704;GO:0006733;GO:0021692;GO:0019538;GO:0044267;GO:0051186;GO:0044260;GO:1901663;GO:0051188;GO:1901661;GO:0044699;GO:0043412;GO:0036211;GO:0008150;GO:0008152;GO:0044767;GO:0006732;GO:0016310;GO:0044249;GO:0009653;GO:0006744;GO:0006743;GO:0032502;GO:0009987;GO:0043170;GO:0009108;GO:0006468;GO:1901576;GO:0006464;GO:0009058;GO:0044763;GO:0044238;GO:…	K08869	ADCK, ABC1	------	------	COG0661	R:General function prediction only	PF03109.13	ABC1	ABC1 family	mitochondrial	1	4	60	High
P57721	Poly(rC)-binding protein 3 OS=Homo sapiens OX=9606 GN=PCBP3 PE=2 SV=2	0.726056	-0.461848	0.01607	down	yes	0.705	0.971	BP:regulation of primary metabolic process;BP:regulation of metabolic process;BP:small molecule metabolic process;BP:small molecule biosynthetic process;BP:organic cyclic compound biosynthetic process;BP:organic cyclic compound metabolic process;BP:single-organism metabolic process;BP:single-organism biosynthetic process;BP:negative regulation of macromolecule metabolic process;BP:dicarboxylic ac…	GO:0080090;GO:0019222;GO:0044281;GO:0044283;GO:1901362;GO:1901360;GO:0044710;GO:0044711;GO:0010605;GO:0043650;GO:0048519;GO:0046483;GO:0060255;GO:2001141;GO:0043436;GO:0009072;GO:0009073;GO:0043648;GO:1901564;GO:1901566;GO:0016053;GO:0050789;GO:1902679;GO:0019438;GO:0009892;GO:0009890;GO:1901576;GO:0044260;GO:0019219;GO:0065007;GO:0009889;GO:0050794;GO:0008150;GO:0008152;GO:0016070;GO:0008652;GO:…	K21444	PCBP3_4	------	------	------	------	PF00013.26;PF07650.14;PF13083.3	KH_1;KH_2;KH_4	KH domain;KH domain;KH domain	cytoplasmic	1	20	39.4	High
P42025	Beta-centractin OS=Homo sapiens OX=9606 GN=ACTR1B PE=1 SV=1	0.634146	-0.657112	0.01388	down	yes	0.65	1.025	BP:cell activation involved in immune response;BP:leukocyte activation involved in immune response;BP:antigen processing and presentation of peptide or polysaccharide antigen via MHC class II;BP:vesicle-mediated transport;BP:myeloid leukocyte activation;BP:immune system process;BP:myeloid cell activation involved in immune response;BP:leukocyte activation;BP:antigen processing and presentation of…	GO:0002263;GO:0002366;GO:0002504;GO:0016192;GO:0002274;GO:0002376;GO:0002275;GO:0045321;GO:0048002;GO:0002283;GO:0006887;GO:0045055;GO:0019882;GO:0019884;GO:0019886;GO:0006810;GO:0001775;GO:0008150;GO:0051234;GO:0046903;GO:0043312;GO:0002495;GO:0044699;GO:0009987;GO:0036230;GO:0032940;GO:0042119;GO:0002478;GO:0043299;GO:0044765;GO:0044763;GO:0051179;GO:1902578;GO:0002252;GO:0031974;GO:0031983;GO:…	K16575	ACTR1, ARP1	------	------	COG5277	Z:Cytoskeleton	PF00022.16	Actin	Actin	cytoplasmic	2	19	42.3	High
Q9NP73	Putative bifunctional UDP-N-acetylglucosamine transferase and deubiquitinase ALG13 OS=Homo sapiens OX=9606 GN=ALG13 PE=1 SV=2	0.761328	-0.39341	0.049	down	yes	0.7225	0.949	BP:nuclear transport;BP:protein localization;BP:membrane organization;BP:signal transduction;BP:cellular component organization or biogenesis;BP:single-organism metabolic process;BP:single-organism biosynthetic process;BP:animal organ development;BP:macromolecule localization;BP:establishment of protein localization;BP:myeloid cell activation involved in immune response;BP:regulation of cellular …	GO:0051169;GO:0008104;GO:0061024;GO:0007165;GO:0071840;GO:0044710;GO:0044711;GO:0048513;GO:0033036;GO:0045184;GO:0002275;GO:0050794;GO:0016192;GO:0002274;GO:0002376;GO:0019538;GO:0045321;GO:0035556;GO:1901576;GO:0006887;GO:0016043;GO:0045055;GO:0002366;GO:0065007;GO:0006629;GO:0006810;GO:0001775;GO:0008150;GO:0008152;GO:0051234;GO:0044767;GO:0046903;GO:0034389;GO:0007420;GO:0046907;GO:0044765;GO:…	K07432	ALG13	hsa00510	N-Glycan biosynthesis	COG5017	S:Function unknown	PF04101.13;PF02338.16	Glyco_tran_28_C;OTU	Glycosyltransferase family 28 C-terminal domain;OTU-like cysteine protease	cytoplasmic	1	1	126	Medium
Q9UMF0	Intercellular adhesion molecule 5 OS=Homo sapiens OX=9606 GN=ICAM5 PE=1 SV=3	0.733402	-0.447323	0.03168	down	yes	0.707	0.964	BP:phagocytosis;BP:regulation of response to stimulus;BP:single organism cell adhesion;BP:cellular component organization or biogenesis;BP:single organismal cell-cell adhesion;BP:single-organism process;BP:taxis;BP:cellular component organization;BP:regulation of biological process;BP:regulation of immune system process;BP:extracellular structure organization;BP:biological regulation;BP:biologica…	GO:0006909;GO:0048583;GO:0098602;GO:0071840;GO:0016337;GO:0044699;GO:0042330;GO:0016043;GO:0050789;GO:0002682;GO:0043062;GO:0065007;GO:0022610;GO:0009987;GO:0006935;GO:0098609;GO:0006810;GO:0044765;GO:0008150;GO:0007155;GO:0051234;GO:0051179;GO:1902578;GO:0040011;GO:0050776;GO:0006897;GO:0016192;GO:0044763;GO:0030198;GO:0005886;GO:0043229;GO:0043227;GO:0043226;GO:0005737;GO:0005615;GO:0031226;GO:…	K06769	ICAM5, TLCN	------	------	------	------	PF13895.3;PF13927.3;PF07679.13;PF00047.22;PF03921.11	Ig_2;Ig_3;I-set;ig;ICAM_N	Immunoglobulin domain;Immunoglobulin domain;Immunoglobulin I-set domain;Immunoglobulin domain;Intercellular adhesion molecule	plasma membrane	1	1	97.1	Medium
R4GMX8	Ran-binding protein 10 OS=Homo sapiens OX=9606 GN=RANBP10 PE=1 SV=1	0.742827	-0.428901	0.03511	down	yes	0.712	0.9585	------	------	------	------	------	------	------	------	PF10607.6;PF00622.25	CLTH;SPRY	CTLH/CRA C-terminal to LisH motif domain;SPRY domain	cytoplasmic	1	3	70.4	High
Q8NBN7	Retinol dehydrogenase 13 OS=Homo sapiens OX=9606 GN=RDH13 PE=1 SV=2	0.722022	-0.469886	0.02209	down	yes	0.7	0.9695	BP:developmental process;BP:response to abiotic stimulus;BP:metabolic process;BP:establishment of localization in cell;BP:cell development;BP:retina layer formation;BP:small molecule metabolic process;BP:retinol metabolic process;BP:cellular lipid metabolic process;BP:retinoid metabolic process;BP:eye photoreceptor cell development;BP:single-organism metabolic process;BP:photoreceptor cell develo…	GO:0032502;GO:0009628;GO:0008152;GO:0051649;GO:0048468;GO:0010842;GO:0044281;GO:0042572;GO:0044255;GO:0001523;GO:0042462;GO:0044710;GO:0042461;GO:0006066;GO:0010817;GO:0048869;GO:0009416;GO:0034754;GO:0071704;GO:0065007;GO:0044699;GO:0009314;GO:0016101;GO:0009644;GO:0065008;GO:0044763;GO:0048646;GO:0048666;GO:0006810;GO:0006629;GO:0044238;GO:0006721;GO:0006720;GO:0009987;GO:0044767;GO:0044765;GO:…	K11161	RDH13	------	------	COG1028;COG1028	Q:Secondary metabolites biosynthesis, transport and catabolism;I:Lipid transport and metabolism	PF00106.22;PF13561.3;PF08659.7;PF01370.18	adh_short;adh_short_C2;KR;Epimerase	short chain dehydrogenase;Enoyl;KR domain;NAD dependent epimerase/dehydratase family	ER	2	11	35.9	High
Q9Y2X7	ARF GTPase-activating protein GIT1 OS=Homo sapiens OX=9606 GN=GIT1 PE=1 SV=2	0.714946	-0.484094	0.01307	down	yes	0.696	0.9735	BP:regulation of response to stimulus;BP:RNA modification;BP:regulation of G-protein coupled receptor protein signaling pathway;BP:signal transduction;BP:cell surface receptor signaling pathway;BP:enzyme linked receptor protein signaling pathway;BP:transmembrane receptor protein tyrosine kinase signaling pathway;BP:regulation of signal transduction;BP:positive regulation of molecular function;BP:…	GO:0048583;GO:0009451;GO:0008277;GO:0007165;GO:0007166;GO:0007167;GO:0007169;GO:0009966;GO:0044093;GO:0034470;GO:0046483;GO:0000154;GO:0034660;GO:0016049;GO:0043547;GO:0044260;GO:0065007;GO:0006364;GO:0065009;GO:0043085;GO:0050794;GO:0043412;GO:0008150;GO:0008152;GO:0048254;GO:0048013;GO:0016070;GO:0016072;GO:0016310;GO:0034641;GO:0023051;GO:0010646;GO:0043087;GO:0051336;GO:0044699;GO:0006139;GO:…	K05737	GIT1	hsa05120;hsa04144;hsa04810	Epithelial cell signaling in Helicobacter pylori infection;Endocytosis;Regulation of actin cytoskeleton	------	------	PF12205.5;PF16559.2;PF08518.8;PF01412.15;PF12796.4;PF13637.3;PF13857.3	GIT1_C;GIT_CC;GIT_SHD;ArfGap;Ank_2;Ank_4;Ank_5	G protein-coupled receptor kinase-interacting protein 1 C term;GIT coiled-coil Rho guanine nucleotide exchange factor;Spa2 homology domain;Putative GTPase activating protein for Arf;Ankyrin repeats;Ankyrin repeats;Ankyrin repeats	cytoplasmic	3	7	84.3	High
P60891	Ribose-phosphate pyrophosphokinase 1 OS=Homo sapiens OX=9606 GN=PRPS1 PE=1 SV=2	0.66517	-0.588206	2.2e-05	down	yes	0.6665	1.002	BP:purine ribonucleoside monophosphate metabolic process;BP:nucleotide biosynthetic process;BP:small molecule metabolic process;BP:small molecule biosynthetic process;BP:organic cyclic compound biosynthetic process;BP:organic cyclic compound metabolic process;BP:single-organism metabolic process;BP:single-organism biosynthetic process;BP:pigment metabolic process;BP:glutamine metabolic process;BP…	GO:0009167;GO:0009165;GO:0044281;GO:0044283;GO:1901362;GO:1901360;GO:0044710;GO:0044711;GO:0042440;GO:0006541;GO:0006542;GO:0048513;GO:0031100;GO:0046033;GO:0043436;GO:0046129;GO:0046128;GO:0042455;GO:0046483;GO:1901564;GO:1901566;GO:0016053;GO:0006163;GO:0006167;GO:0006164;GO:0019438;GO:0009163;GO:0009161;GO:0006807;GO:0009064;GO:1901576;GO:0009127;GO:0009124;GO:0019637;GO:0018130;GO:0006220;GO:…	K00948	PRPS, prsA	hsa01230;hsa00030;hsa01200;hsa00230	Biosynthesis of amino acids;Pentose phosphate pathway;Carbon metabolism;Purine metabolism	COG0462	F:Nucleotide transport and metabolism	PF13793.3;PF14572.3;PF00156.24	Pribosyltran_N;Pribosyl_synth;Pribosyltran	N-terminal domain of ribose phosphate pyrophosphokinase;Phosphoribosyl synthetase-associated domain;Phosphoribosyl transferase domain	cytoplasmic	4	38	34.8	High
A0A140T912	HLA class I histocompatibility antigen, C alpha chain OS=Homo sapiens OX=9606 GN=HLA-C PE=1 SV=1	0.759494	-0.39689	0.04888	down	yes	0.72	0.948	BP:immune system process;BP:antigen processing and presentation of peptide antigen;BP:antigen processing and presentation of peptide antigen via MHC class I;BP:antigen processing and presentation;BP:biological_process;BP:immune response;BP:antigen processing and presentation of peptide or polysaccharide antigen via MHC class II;BP:response to stimulus;CC:intrinsic component of membrane;CC:integra…	GO:0002376;GO:0048002;GO:0002474;GO:0019882;GO:0008150;GO:0006955;GO:0002504;GO:0050896;GO:0031224;GO:0016021;GO:0016020;GO:0044459;GO:0043234;GO:0042611;GO:0042613;GO:0042612;GO:0032991;GO:0005575;GO:0044464;GO:0098797;GO:0098796;GO:0044425;GO:0003674;GO:0005488;GO:0042277;GO:0042605;GO:0033218;GO:0003823	------	------	------	------	------	------	PF00129.15;PF07654.12;PF06623.8;PF13927.3	MHC_I;C1-set;MHC_I_C;Ig_3	Class I Histocompatibility antigen, domains alpha 1 and 2;Immunoglobulin C1-set domain;MHC_I C-terminus;Immunoglobulin domain	plasma membrane	2	43	41.4	High
Q02539	Histone H1.1 OS=Homo sapiens OX=9606 GN=H1-1 PE=1 SV=3	0.712526	-0.488986	0.01745	down	yes	0.694	0.974	BP:primary metabolic process;BP:regulation of primary metabolic process;BP:regulation of metabolic process;BP:regulation of transport;BP:negative regulation of cellular metabolic process;BP:macromolecular complex subunit organization;BP:positive regulation of receptor-mediated endocytosis;BP:organic cyclic compound biosynthetic process;BP:cellular component organization or biogenesis;BP:RNA biosy…	GO:0044238;GO:0080090;GO:0019222;GO:0051049;GO:0031324;GO:0043933;GO:0048260;GO:1901362;GO:0071840;GO:0032774;GO:0007517;GO:0010605;GO:0048869;GO:0010033;GO:0048511;GO:0045667;GO:0048513;GO:0045661;GO:0044092;GO:0048518;GO:0048519;GO:0045668;GO:0051052;GO:0051050;GO:0060255;GO:0065004;GO:0030903;GO:2001141;GO:0043433;GO:0046483;GO:0044702;GO:0044707;GO:0044249;GO:0001822;GO:0006275;GO:0043068;GO:…	K11275	H1_5	------	------	------	------	PF00538.16	Linker_histone	linker histone H1 and H5 family	nuclear	1	21	21.8	High
P14649	Myosin light chain 6B OS=Homo sapiens OX=9606 GN=MYL6B PE=1 SV=1	0.543016	-0.880934	0.02924	down	yes	0.587	1.081	BP:muscle system process;BP:organic cyclic compound metabolic process;BP:skeletal muscle tissue development;BP:interspecies interaction between organisms;BP:multi-organism process;BP:muscle contraction;BP:muscle filament sliding;BP:actin filament-based movement;BP:heterocycle metabolic process;BP:viral RNA genome replication;BP:movement of cell or subcellular component;BP:nitrogen compound metabo…	GO:0003012;GO:1901360;GO:0007519;GO:0044419;GO:0051704;GO:0006936;GO:0030049;GO:0030048;GO:0046483;GO:0039694;GO:0006928;GO:0006807;GO:0044260;GO:0006139;GO:0003008;GO:0009888;GO:0008150;GO:0008152;GO:0016070;GO:0039703;GO:0034641;GO:0044699;GO:0033275;GO:0032502;GO:0032501;GO:0019079;GO:0009987;GO:0006725;GO:0043170;GO:0044033;GO:0090304;GO:0014706;GO:0071704;GO:0030029;GO:0044764;GO:0044763;GO:…	K12751	MYL6	hsa04530;hsa04921;hsa04270	Tight junction;Oxytocin signaling pathway;Vascular smooth muscle contraction	COG5126;COG5126;COG5126	D:Cell cycle control, cell division, chromosome partitioning;Z:Cytoskeleton;T:Signal transduction mechanisms	PF13405.3;PF00036.29;PF13499.3	EF-hand_6;EF-hand_1;EF-hand_7	EF-hand domain;EF hand;EF-hand domain pair	cytoplasmic	1	19	22.8	High
Q9NRY2	SOSS complex subunit C OS=Homo sapiens OX=9606 GN=INIP PE=1 SV=1	0.702758	-0.5089	0.005911	down	yes	0.688	0.979	BP:primary metabolic process;BP:response to radiation;BP:nucleobase-containing compound metabolic process;BP:protein localization;BP:nucleic acid metabolic process;BP:cellular nitrogen compound metabolic process;BP:nitrogen compound metabolic process;BP:protein transport;BP:organic cyclic compound metabolic process;BP:single-organism metabolic process;BP:response to ionizing radiation;BP:cellular…	GO:0044238;GO:0009314;GO:0006139;GO:0008104;GO:0090304;GO:0034641;GO:0006807;GO:0015031;GO:1901360;GO:0044710;GO:0010212;GO:0044260;GO:0045184;GO:0071704;GO:0044699;GO:0071702;GO:0033036;GO:0009987;GO:0044765;GO:0006281;GO:0009306;GO:0006810;GO:0006725;GO:0051716;GO:0006974;GO:0006950;GO:0008150;GO:0008152;GO:0051649;GO:0051234;GO:0051179;GO:1902578;GO:0046483;GO:0009628;GO:0046903;GO:0046907;GO:…	------	------	------	------	------	------	PF15925.2	SOSSC	SOSS complex subunit C	cytoplasmic	1	13	11.4	High
P54750	Calcium/calmodulin-dependent 3',5'-cyclic nucleotide phosphodiesterase 1A OS=Homo sapiens OX=9606 GN=PDE1A PE=1 SV=2	0.70051	-0.513522	0.008099	down	yes	0.6865	0.98	BP:cyclic nucleotide catabolic process;BP:organophosphate catabolic process;BP:nucleotide catabolic process;BP:signal transduction;BP:organic cyclic compound metabolic process;BP:organic cyclic compound catabolic process;BP:single-organism catabolic process;BP:single-organism metabolic process;BP:regulation of cell proliferation;BP:organonitrogen compound catabolic process;BP:cellular catabolic p…	GO:0009214;GO:0046434;GO:0009166;GO:0007165;GO:1901360;GO:1901361;GO:0044712;GO:0044710;GO:0042127;GO:1901565;GO:0044248;GO:1901564;GO:0006163;GO:0019439;GO:0044281;GO:0042493;GO:0006807;GO:0006198;GO:0006195;GO:0042981;GO:0050789;GO:1901575;GO:0046483;GO:0065007;GO:0019637;GO:0007186;GO:0009150;GO:0009154;GO:0046700;GO:0009261;GO:0008150;GO:0008152;GO:0034655;GO:0050794;GO:0044270;GO:0050896;GO:…	K13755	PDE1	hsa04020;hsa00230;hsa05032;hsa04742;hsa04740;hsa04924	Calcium signaling pathway;Purine metabolism;Morphine addiction;Taste transduction;Olfactory transduction;Renin secretion	------	------	PF00233.16;PF08499.9	PDEase_I;PDEase_I_N	3'5'-cyclic nucleotide phosphodiesterase;3'5'-cyclic nucleotide phosphodiesterase N-terminal	cytoplasmic	1	4	61.2	High
Q8NHQ1	Centrosomal protein of 70 kDa OS=Homo sapiens OX=9606 GN=CEP70 PE=1 SV=2	0.706455	-0.501331	0.01018	down	yes	0.6895	0.976	BP:G2/M transition of mitotic cell cycle;BP:cellular component morphogenesis;BP:cellular component organization or biogenesis;BP:single-organism catabolic process;BP:single-organism metabolic process;BP:cellular developmental process;BP:regulation of cytoskeleton organization;BP:biological regulation;BP:regulation of microtubule cytoskeleton organization;BP:regulation of biological process;BP:cil…	GO:0000086;GO:0032989;GO:0071840;GO:0044712;GO:0044710;GO:0048869;GO:0051493;GO:0065007;GO:0070507;GO:0050789;GO:0097711;GO:1901575;GO:0016043;GO:0016042;GO:0006629;GO:0060271;GO:0050794;GO:1901987;GO:0008150;GO:0008152;GO:0033043;GO:0051128;GO:1901990;GO:0032886;GO:0009653;GO:0044699;GO:0010564;GO:0032502;GO:0009987;GO:0048858;GO:0044839;GO:0030030;GO:1903047;GO:0044770;GO:0044772;GO:0022402;GO:…	K16802	CEP70	------	------	------	------	------	------	------	cytoplasmic	1	1	69.7	Low
O75818	Ribonuclease P protein subunit p40 OS=Homo sapiens OX=9606 GN=RPP40 PE=1 SV=3	0.723085	-0.467763	0.02133	down	yes	0.6985	0.966	BP:tRNA 5'-leader removal;BP:nucleic acid metabolic process;BP:nucleic acid phosphodiester bond hydrolysis;BP:cellular nitrogen compound metabolic process;BP:nitrogen compound metabolic process;BP:ncRNA metabolic process;BP:ncRNA processing;BP:organic cyclic compound metabolic process;BP:nucleobase-containing compound metabolic process;BP:cellular macromolecule metabolic process;BP:organic substa…	GO:0001682;GO:0090304;GO:0090305;GO:0034641;GO:0006807;GO:0034660;GO:0034470;GO:1901360;GO:0006139;GO:0044260;GO:0071704;GO:0006364;GO:0016070;GO:0008033;GO:0009987;GO:0006725;GO:0008150;GO:0008152;GO:0046483;GO:0090502;GO:0044238;GO:0016072;GO:0090501;GO:0044237;GO:0043170;GO:0006399;GO:0006396;GO:1990904;GO:0030681;GO:0043227;GO:0005737;GO:0005732;GO:0005655;GO:0005634;GO:0030529;GO:0005654;GO:…	K14530	RPP40	hsa03008;hsa03013	Ribosome biogenesis in eukaryotes;RNA transport	------	------	PF08584.8	Ribonuc_P_40	Ribonuclease P 40kDa	mitochondrial	3	16	41.8	High
Q9BRQ8	Apoptosis-inducing factor 2 OS=Homo sapiens OX=9606 GN=AIFM2 PE=1 SV=1	0.698875	-0.516893	0.007301	down	yes	0.6835	0.978	BP:membrane organization;BP:inner mitochondrial membrane organization;BP:mitochondrial membrane organization;BP:mitochondrion organization;BP:single-organism metabolic process;BP:electron transport chain;BP:respiratory electron transport chain;BP:positive regulation of biological process;BP:oxidation-reduction process;BP:cellular response to stress;BP:regulation of apoptotic process;BP:regulation…	GO:0061024;GO:0007007;GO:0007006;GO:0007005;GO:0044710;GO:0022900;GO:0022904;GO:0048518;GO:0055114;GO:0033554;GO:0042981;GO:0050789;GO:0016043;GO:0065007;GO:0071840;GO:0051716;GO:0050794;GO:0006950;GO:0044802;GO:0008152;GO:0012501;GO:0050896;GO:0008150;GO:0042407;GO:0044699;GO:0009987;GO:0006974;GO:0008637;GO:0010942;GO:0006091;GO:0010941;GO:0008219;GO:0043065;GO:0043067;GO:0043068;GO:0006915;GO:…	------	------	------	------	COG1252;COG1251;COG0446	C:Energy production and conversion;	PF07992.11;PF00070.24;PF13738.3	Pyr_redox_2;Pyr_redox;Pyr_redox_3	Pyridine nucleotide-disulphide oxidoreductase;Pyridine nucleotide-disulphide oxidoreductase;Pyridine nucleotide-disulphide oxidoreductase	cytoplasmic	6	24	40.5	High
[truncated: 129 more rows]
